# Supplementary material for: Understanding electrostatics and covalency effects in highly anisotropic organometallic sandwich dysprosium complexes [Dy(CmRm)2] (where R = H, SiH3, CH3 and m = 4 to 9): a computational perspective
Source: Royal Society of Chemistry journal article supplement (doi:10.1039/d3dt01646c), 2023-01-01
Supplement: d3dt01646c1.pdf [file d3dt01646c1.pdf]

Supporting Information

**Understanding Electrostatics and Covalency Effects in Highly Anisotropic Organometallic Sandwich Dysprosium Complexes [Dy(C<sub>m</sub>R<sub>m</sub>)<sub>2</sub>] (where R = H, SiH<sub>3</sub>, CH<sub>3</sub> and m = 4 to 9): A Computational Perspective**

*Ibtesham Tarannum, Shruti Moorthy, Saurabh Kumar Singh\**

*Department of Chemistry, Indian Institute of Technology Hyderabad, Kandi, Sangareddy, Telangana, India-502285*

## Table of Contents

|                                                                                                                                                                                                                                                                                                                                                           |    |
|-----------------------------------------------------------------------------------------------------------------------------------------------------------------------------------------------------------------------------------------------------------------------------------------------------------------------------------------------------------|----|
| <b>Figure S1:</b> DFT optimized structures of complexes <b>1-6</b> . (Colour code: Dy (magenta), Si (green), C (grey), H (white)).....                                                                                                                                                                                                                    | 5  |
| <b>Table S1(a):</b> Comparison of selected structural parameters of complex <b>5</b> at different level of theory with the X-ray crystal structure. ....                                                                                                                                                                                                  | 6  |
| <b>Table S1(b):</b> Comparison of selected structural parameters of <b>1-6</b> optimized at BP86 level of theory and relevant X-ray crystal structures. ....                                                                                                                                                                                              | 6  |
| <b>Table S2:</b> EDA analysis for $[\text{Dy}(\text{C}_m\text{R}_m)_2]$ (where R = H, SiH <sub>3</sub> , CH <sub>3</sub> m = 4 to 9, and n = 1, 3) complexes. All the values provided here are in the kcal/mol. ....                                                                                                                                      | 6  |
| <b>Table S3:</b> Percentage contribution of the decomposed energies to the total bonding energy for complexes <b>1-6</b> along with fragmentation scheme. ....                                                                                                                                                                                            | 7  |
| <b>Table S4:</b> AILFT computed the Slater Condon parameters $F^2$ , $F^4$ , and $F^6$ , the one-electron effective parameters for spin-orbit coupling ( $\zeta$ ) for complexes <b>1-6</b> at NEVPT2 level of theory. The values in the parenthesis are the CASSCF computed values. All the values provided here are in the cm <sup>-1</sup> . ....      | 7  |
| <b>Table S5:</b> AILFT computed the Racah parameters $E^1$ , $E^2$ , and $E^3$ for complexes <b>1-6</b> at NEVPT2 level of theory. The values in the parenthesis are the CASSCF computed values. All the values provided here are in the cm <sup>-1</sup> .....                                                                                           | 7  |
| <b>Table S6:</b> Reduction (%) in Slater Condon parameter $F^2$ , $F^4$ , and $F^6$ and Racah parameters $E^1$ , $E^2$ , and $E^3$ for complexes <b>1-6</b> at NEVPT2 level of theory. The values in the parenthesis are the CASSCF computed values. ....                                                                                                 | 8  |
| <b>Figure S2:</b> AILFT-NEVPT2 computed trends in the reduction (%) in Racah parameters $E^1$ , $E^2$ , and $E^3$ for complexes <b>1-6</b> . ....                                                                                                                                                                                                         | 9  |
| <b>Figure S3:</b> AILFT-CASSCF computed trends in the reduction (%) in Racah parameters $E^1$ , $E^2$ , and $E^3$ for complexes <b>1-6</b> . ....                                                                                                                                                                                                         | 9  |
| <b>Figure S4:</b> AILFT-NEVPT2 computed trends in the reduction (%) in Slater Condon parameters $F^2$ , $F^4$ , and $F^6$ for complexes <b>1-6</b> . ....                                                                                                                                                                                                 | 10 |
| <b>Figure S5:</b> AILFT-CASSCF computed trends in the reduction (%) in Slater Condon parameters $F^2$ , $F^4$ , and $F^6$ for complexes <b>1-6</b> . ....                                                                                                                                                                                                 | 10 |
| <b>Table S7:</b> Comparison of CASSCF-Derived Mulliken Charges <sup>a</sup> for the Dy <sup>III</sup> Ion in complex <b>1-6</b> . ....                                                                                                                                                                                                                    | 10 |
| <b>Scheme S1:</b> Schematic representation of cone angle ( $\angle L_{\text{cent}}\text{-M-L}$ ) in DFT optimized geometries of <b>1 – 6</b> complexes.....                                                                                                                                                                                               | 11 |
| <b>Figure S6:</b> CASSCF/NEVPT2 computed the trends of Barrier height ( $U_{\text{cal}}$ ) for complexes <b>1-6</b> (blue squares) and <b>1Q-6Q</b> (red circles). ....                                                                                                                                                                                   | 12 |
| <b>Figure S7:</b> CASSCF/NEVPT2 computed Splitting of <sup>6</sup> H and <sup>6</sup> F states under Crystal field (grey bars) and Ligand field (blue bars) for the complex <b>1</b> . ....                                                                                                                                                               | 12 |
| <b>Figure S8:</b> DFT computed charges on ligands (by summing up the charges of the atoms attached to the respective carbons of the ring) using CHELPG (CHarges from ELectrostatic Potential Grid) method for complexes <b>1-6</b> . ....                                                                                                                 | 13 |
| <b>Figure S9:</b> SINGLE_ANISO computed g-tensor orientation along with g-values and wave function decomposition for ground state Kramer doublet for complexes <b>1-6</b> (cyan) and <b>1Q-6Q</b> (yellow). The wave function decomposition for <b>1Q-6Q</b> is 100% $ \pm 15/2\rangle$ . Color code: Dy (magenta); C (grey); Si (green); H (white). .... | 14 |
| <b>Table S8:</b> SINGLE_ANISO computed the properties of the two lowest Kramers' doublets of the <sup>6</sup> H <sub>15/2</sub> multiplet in complexes <b>1Q-6Q</b> . ....                                                                                                                                                                                | 15 |
| <b>Figure S10:</b> CASSCF/NEVPT2 computed the trends of Kramers' Doublets (in cm <sup>-1</sup> ) for <b>1Q-6Q</b> . ....                                                                                                                                                                                                                                  | 16 |
| <b>Figure S11:</b> AILFT-NEVPT2 splitting pattern of 4f orbitals in complexes <b>1Q-6Q</b> . ....                                                                                                                                                                                                                                                         | 16 |
| <b>Table S9:</b> SINGLE_ANISO computed the properties of the two lowest Kramers' doublets of the <sup>6</sup> H <sub>15/2</sub> multiplet for $[\text{Dy}(\text{CH}_3)_2]^+$ and $[\text{Dy}(\text{CH}_3)_4]^-$ . ....                                                                                                                                    | 17 |

|                                                                                                                                                                                                                                                                                                                                                                                                                                                                                                                                     |    |
|-------------------------------------------------------------------------------------------------------------------------------------------------------------------------------------------------------------------------------------------------------------------------------------------------------------------------------------------------------------------------------------------------------------------------------------------------------------------------------------------------------------------------------------|----|
| <b>Figure S12:</b> AILFT-NEVPT2 computed splitting pattern of 4 <i>f</i> orbitals in [Dy(CH <sub>3</sub> ) <sub>2</sub> ] <sup>+</sup> , [Dy(C <sub>4</sub> (SiH <sub>3</sub> ) <sub>4</sub> ) <sub>2</sub> ] <sup>-</sup> ( <b>1</b> ), [Dy(C <sub>5</sub> (CH <sub>3</sub> ) <sub>5</sub> ) <sub>2</sub> ] <sup>+</sup> ( <b>2</b> ), [Dy(C <sub>8</sub> H <sub>8</sub> ) <sub>2</sub> ] <sup>-</sup> ( <b>5</b> ) and [Dy(CH <sub>3</sub> ) <sub>4</sub> ] <sup>-</sup> along with the <i>g</i> values for ground state KDs..... | 17 |
| <b>Figure S13:</b> <i>Ab-Initio</i> computed blockade barrier for magnetic relaxation for complexes <b>1-6</b> . The blue line indicates the KDs as a function of magnetic moments. The black, red, and green lines represent thermal, QTM, and possible Orbach relaxations. ....                                                                                                                                                                                                                                                   | 18 |
| <b>Figure S14:</b> <i>Ab-Initio</i> computed blockade barrier for magnetic relaxation for <b>1<sub>Q</sub>-6<sub>Q</sub></b> . The blue line indicates the KDs as a function of magnetic moments. The black, red, and green lines represent thermal, QTM, and possible Orbach relaxations. ....                                                                                                                                                                                                                                     | 19 |
| <b>Table S10:</b> CASSCF computed 21 roots of sextet (red) along with 224 roots of quartet and 490 roots of doublet states for [Dy(C <sub>4</sub> (SiH <sub>3</sub> ) <sub>4</sub> ) <sub>2</sub> ] <sup>-</sup> complex. All the values are reported herein cm <sup>-1</sup> . ....                                                                                                                                                                                                                                                | 20 |
| <b>Table S13:</b> NEVPT2 computed 21 roots of sextet (red) along with 224 roots of quartet and 490 roots of doublet states for [Dy(C <sub>4</sub> (SiH <sub>3</sub> ) <sub>4</sub> ) <sub>2</sub> ] <sup>-</sup> complex. All the values are reported herein cm <sup>-1</sup> . ....                                                                                                                                                                                                                                                | 21 |
| <b>Table S14:</b> CASSCF computed the spin-orbit states for [Dy(C <sub>4</sub> (SiH <sub>3</sub> ) <sub>4</sub> ) <sub>2</sub> ] <sup>-</sup> complex. All the values are reported here in cm <sup>-1</sup> . ....                                                                                                                                                                                                                                                                                                                  | 23 |
| <b>Table S15:</b> NEVPT2 computed the spin-orbit states for [Dy(C <sub>4</sub> (SiH <sub>3</sub> ) <sub>4</sub> ) <sub>2</sub> ] <sup>-</sup> complex. All the values are reported here in cm <sup>-1</sup> . ....                                                                                                                                                                                                                                                                                                                  | 24 |
| <b>Table S16:</b> CASSCF computed 21 roots of sextet (red) along with 224 roots of quartet and 490 roots of doublet states for [Dy(C <sub>5</sub> H <sub>5</sub> ) <sub>2</sub> ] <sup>+</sup> complex. All the values are reported herein cm <sup>-1</sup> . ....                                                                                                                                                                                                                                                                  | 26 |
| <b>Table S17:</b> NEVPT2 computed 21 roots of sextet (red) along with 224 roots of quartet and 490 roots of doublet states for [Dy(C <sub>5</sub> H <sub>5</sub> ) <sub>2</sub> ] <sup>+</sup> complex. All the values are reported herein cm <sup>-1</sup> . ....                                                                                                                                                                                                                                                                  | 28 |
| <b>Table S18:</b> CASSCF computed the spin-orbit states for [Dy(C <sub>5</sub> H <sub>5</sub> ) <sub>2</sub> ] <sup>+</sup> complex. All the values are reported here in cm <sup>-1</sup> . ....                                                                                                                                                                                                                                                                                                                                    | 29 |
| <b>Table S19:</b> NEVPT2 computed the spin-orbit states for [Dy(C <sub>5</sub> H <sub>5</sub> ) <sub>2</sub> ] <sup>+</sup> complex. All the values are reported here in cm <sup>-1</sup> . ....                                                                                                                                                                                                                                                                                                                                    | 31 |
| <b>Table S20:</b> CASSCF computed 21 roots of sextet (red) along with 224 roots of quartet and 490 roots of doublet states for [Dy(C <sub>6</sub> H <sub>6</sub> ) <sub>2</sub> ] <sup>3+</sup> complex. All the values are reported herein cm <sup>-1</sup> . ....                                                                                                                                                                                                                                                                 | 33 |
| <b>Table S21:</b> NEVPT2 computed 21 roots of sextet (red) along with 224 roots of quartet and 490 roots of doublet states for [Dy(C <sub>6</sub> H <sub>6</sub> ) <sub>2</sub> ] <sup>3+</sup> complex. All the values are reported herein cm <sup>-1</sup> . ....                                                                                                                                                                                                                                                                 | 35 |
| <b>Table S22:</b> CASSCF computed the spin-orbit states for [Dy(C <sub>6</sub> H <sub>6</sub> ) <sub>2</sub> ] <sup>3+</sup> complex. All the values are reported here in cm <sup>-1</sup> . ....                                                                                                                                                                                                                                                                                                                                   | 36 |
| <b>Table S23:</b> NEVPT2 computed the spin-orbit states for [Dy(C <sub>6</sub> H <sub>6</sub> ) <sub>2</sub> ] <sup>3+</sup> complex. All the values are reported here in cm <sup>-1</sup> . ....                                                                                                                                                                                                                                                                                                                                   | 38 |
| <b>Table S24:</b> CASSCF computed 21 roots of sextet (red) along with 224 roots of quartet and 490 roots of doublet states for [Dy(C <sub>7</sub> H <sub>7</sub> ) <sub>2</sub> ] <sup>3-</sup> complex. All the values are reported herein cm <sup>-1</sup> . ....                                                                                                                                                                                                                                                                 | 40 |
| <b>Table S25:</b> NEVPT2 computed 21 roots of sextet (red) along with 224 roots of quartet and 490 roots of doublet states for [Dy(C <sub>7</sub> H <sub>7</sub> ) <sub>2</sub> ] <sup>3-</sup> complex. All the values are reported herein cm <sup>-1</sup> . ....                                                                                                                                                                                                                                                                 | 41 |
| <b>Table S26:</b> CASSCF computed the spin-orbit states for [Dy(C <sub>7</sub> H <sub>7</sub> ) <sub>2</sub> ] <sup>3-</sup> complex. All the values are reported here in cm <sup>-1</sup> . ....                                                                                                                                                                                                                                                                                                                                   | 43 |
| <b>Table S27:</b> NEVPT2 computed the spin-orbit states for [Dy(C <sub>7</sub> H <sub>7</sub> ) <sub>2</sub> ] <sup>3-</sup> complex. All the values are reported here in cm <sup>-1</sup> . ....                                                                                                                                                                                                                                                                                                                                   | 45 |
| <b>Table S28:</b> CASSCF computed 21 roots of sextet (red) along with 224 roots of quartet and 490 roots of doublet states for [Dy(C <sub>8</sub> H <sub>8</sub> ) <sub>2</sub> ] <sup>-</sup> complex. All the values are reported herein cm <sup>-1</sup> . ....                                                                                                                                                                                                                                                                  | 46 |
| <b>Table S29:</b> NEVPT2 computed 21 roots of sextet (red) along with 224 roots of quartet and 490 roots of doublet states for [Dy(C <sub>8</sub> H <sub>8</sub> ) <sub>2</sub> ] <sup>-</sup> complex. All the values are reported herein cm <sup>-1</sup> . ....                                                                                                                                                                                                                                                                  | 48 |

|                                                                                                                                                                                                                                           |    |
|-------------------------------------------------------------------------------------------------------------------------------------------------------------------------------------------------------------------------------------------|----|
| <b>Table S30:</b> CASSCF computed the spin-orbit states for $[\text{Dy}(\text{C}_8\text{H}_8)_2]^-$ complex. All the values are reported here in $\text{cm}^{-1}$ .....                                                                   | 50 |
| <b>Table S31:</b> NEVPT2 computed the spin-orbit states for $[\text{Dy}(\text{C}_8\text{H}_8)_2]^-$ complex. All the values are reported here in $\text{cm}^{-1}$ .....                                                                   | 52 |
| <b>Table S32:</b> CASSCF computed 21 roots of sextet (red) along with 224 roots of quartet and 490 roots of doublet states for $[\text{Dy}(\text{C}_9\text{H}_9)_2]^+$ complex. All the values are reported herein $\text{cm}^{-1}$ ..... | 53 |
| <b>Table S33:</b> NEVPT2 computed 21 roots of sextet (red) along with 224 roots of quartet and 490 roots of doublet states for $[\text{Dy}(\text{C}_9\text{H}_9)_2]^+$ complex. All the values are reported herein $\text{cm}^{-1}$ ..... | 55 |
| <b>Table S34:</b> CASSCF computed the spin-orbit states for $[\text{Dy}(\text{C}_9\text{H}_9)_2]^+$ complex. All the values are reported here in $\text{cm}^{-1}$ .....                                                                   | 57 |
| <b>Table S35:</b> NEVPT2 computed the spin-orbit states for $[\text{Dy}(\text{C}_9\text{H}_9)_2]^+$ complex. All the values are reported here in $\text{cm}^{-1}$ .....                                                                   | 59 |
| <b>Table S36:</b> NEVPT2 computed the eight low lying Kramer Doublets for $\mathbf{1}_Q - \mathbf{6}_Q$ . All the values are reported here in $\text{cm}^{-1}$ .....                                                                      | 60 |
| <b>Table S37:</b> DFT-optimized geometry coordinates.....                                                                                                                                                                                 | 61 |
| <b>EDA Input File</b> .....                                                                                                                                                                                                               | 64 |
| <b>CASSCF Input File</b> .....                                                                                                                                                                                                            | 66 |
| <b>References</b> .....                                                                                                                                                                                                                   | 70 |

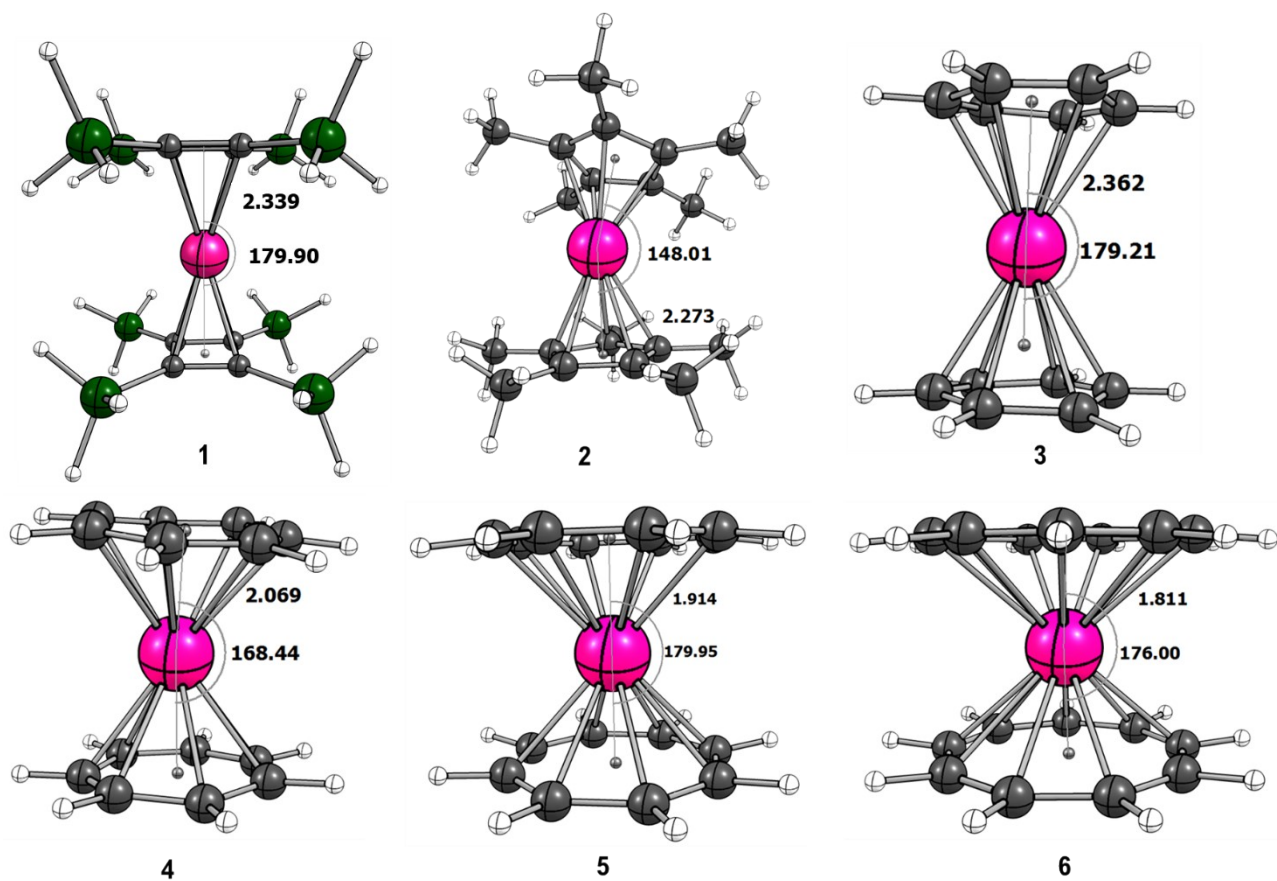

**Figure S1:** DFT optimized structures of complexes 1-6. (Colour code: Dy (magenta), Si (green), C (grey), H (white)).

**Table S1(a):** Comparison of selected structural parameters of complex 5 at different level of theory with the X-ray crystal structure.

| [Dy(C <sub>8</sub> H <sub>8</sub> ) <sub>2</sub> ] <sup>-</sup> | X-ray crystal structure | BP86  | B3LYP | TPSSh | M06   | wB97X-D3 |
|-----------------------------------------------------------------|-------------------------|-------|-------|-------|-------|----------|
| Avg. Dy-L (Å)                                                   | 2.641                   | 2.664 | 2.674 | 2.651 | 2.663 | 2.656    |
| Dy-L <sub>cent</sub> (Å)                                        | 1.918                   | 1.912 | 1.932 | 1.897 | 1.921 | 1.910    |
| ∠ L <sub>cent</sub> -M-L <sub>cent</sub> (°)                    | 180                     | 180   | 180   | 180   | 180   | 180      |

**Table S1(b):** Comparison of selected structural parameters of 1-6 optimized at BP86 level of theory and relevant X-ray crystal structures.

| DFT Optimized geometry                                                             |                          |                                          | Reported X-ray crystal structure                                                                                                       |                      |                                          |      |
|------------------------------------------------------------------------------------|--------------------------|------------------------------------------|----------------------------------------------------------------------------------------------------------------------------------------|----------------------|------------------------------------------|------|
| Species                                                                            | Dy-L <sub>cent</sub> (Å) | ∠ L <sub>cent</sub> -M-L <sub>cent</sub> | Species                                                                                                                                | L <sub>cent</sub> -M | ∠ L <sub>cent</sub> -M-L <sub>cent</sub> | ref  |
| [Dy(C <sub>4</sub> (SiH <sub>3</sub> ) <sub>4</sub> ) <sub>2</sub> ] <sup>1-</sup> | 2.339                    | 179.9°                                   | [Dy(C <sub>4</sub> (Si(CH <sub>3</sub> ) <sub>3</sub> ) <sub>4</sub> (C <sub>5</sub> (CH <sub>3</sub> ) <sub>4</sub> <sup>t</sup> Bu)] | 2.273*               | 141.5°                                   | [1]  |
| [Dy(C <sub>5</sub> (CH <sub>3</sub> ) <sub>5</sub> ) <sub>2</sub> ] <sup>+</sup>   | 2.273                    | 148.0°                                   | [Dy(C <sub>5</sub> (CH <sub>3</sub> ) <sub>5</sub> ) <sub>2</sub> (NH <sub>3</sub> )] <sup>+</sup>                                     | 2.347                | 143.9°                                   | [2]* |
| [Dy(C <sub>6</sub> H <sub>6</sub> ) <sub>2</sub> ] <sup>3+</sup>                   | 2.362                    | 179.2°                                   | [Mo(C <sub>6</sub> H <sub>6</sub> )] <sup>3+</sup>                                                                                     | 1.779                | 176.3°                                   | [3]  |
| [Dy(C <sub>7</sub> H <sub>7</sub> ) <sub>2</sub> ] <sup>3-</sup>                   | 2.070                    | 168.4°                                   | [U(C <sub>7</sub> H <sub>7</sub> ) <sub>2</sub> ] <sup>3-</sup>                                                                        | 1.986                | 180.0°                                   | [4]  |
| [Dy(C <sub>8</sub> H <sub>8</sub> ) <sub>2</sub> ] <sup>-</sup>                    | 1.912                    | 180.0°                                   | [Dy(C <sub>8</sub> H <sub>8</sub> ) <sub>2</sub> ] <sup>-</sup>                                                                        | 1.921                | 180.0°                                   | [5]  |
| [Dy(C <sub>9</sub> H <sub>9</sub> ) <sub>2</sub> ] <sup>+</sup>                    | 1.809                    | 179.9°                                   | [Dy(C <sub>9</sub> H <sub>9</sub> )(C <sub>8</sub> H <sub>8</sub> )]                                                                   | 1.875*               | 173.0°                                   | [6]  |

\*NH<sub>3</sub> is directly bonded with {DyCp<sub>2</sub>};  
 The avg. ∠L<sub>cent</sub>-M-L<sub>cent</sub> bond angle in DFT optimized geometry of various substituted [DyCp<sub>2</sub>]<sup>+</sup> complexes ranges between 144° to 162° (see *J. Am. Chem. Soc.*, 2021, 143, 5943)  
 \*Dy-(C<sub>4</sub>(Si(CH<sub>3</sub>)<sub>3</sub>)<sub>4</sub>(centroid), \*Dy-(C<sub>9</sub>H<sub>9</sub>)(centroid);

**Table S2:** EDA analysis for [Dy(C<sub>m</sub>R<sub>m</sub>)<sub>2</sub>] (where R = H, SiH<sub>3</sub>, CH<sub>3</sub> m = 4 to 9, and n = 1, 3) complexes. All the values provided here are in the kcal/mol.

| Parameters                                                                 | 1      | 2      | 3      | 4      | 5      | 6      |
|----------------------------------------------------------------------------|--------|--------|--------|--------|--------|--------|
| <b>Orbital Interaction</b>                                                 | -147.1 | -144.5 | -123.6 | -172.6 | -139.4 | -134.9 |
| <b>Pauli Repulsion</b>                                                     | 106.9  | 109.0  | 52.9   | 121.6  | 101.8  | 82.9   |
| <b>Electrostatic Energy</b>                                                | -273.9 | -267.5 | -49.8  | -157.9 | -281.4 | -226.8 |
| <b>Dispersion correction</b>                                               | -8.6   | -8.2   | -2.9   | -4.6   | -6.2   | -7.9   |
| <b>Total Binding Energy</b>                                                | -322.7 | -311.3 | -123.4 | -213.5 | -325.1 | -286.7 |
| <b>% of covalency</b>                                                      | 34.9   | 35.1   | 71.3   | 52.2   | 33.1   | 37.3   |
| % of covalency = E <sub>orb</sub> /(E <sub>orb</sub> + E <sub>elec</sub> ) |        |        |        |        |        |        |

**Table S3:** Percentage contribution of the decomposed energies to the total bonding energy for complexes **1-6** along with fragmentation scheme.

| Full Complex | $f_1$                                                                             | $f_2$                                                            | $E_{orb}$ (%) | $E_{Pauli}$ (%) | $E_{disp}$ (%) | $E_{elec}$ (%) |
|--------------|-----------------------------------------------------------------------------------|------------------------------------------------------------------|---------------|-----------------|----------------|----------------|
| <b>1</b>     | {Dy(C <sub>4</sub> (SiH <sub>3</sub> ) <sub>4</sub> )} <sup>+</sup>               | {C <sub>4</sub> (SiH <sub>3</sub> ) <sub>4</sub> } <sup>2-</sup> | 45.6          | 33.1            | 2.6            | 84.9           |
| <b>2</b>     | {Dy(C <sub>5</sub> (CH <sub>3</sub> ) <sub>5</sub> ) <sub>2</sub> } <sup>2+</sup> | {C <sub>5</sub> (CH <sub>3</sub> ) <sub>5</sub> } <sup>-</sup>   | 46.4          | 35.0            | 2.6            | 85.9           |
| <b>3</b>     | {Dy(C <sub>6</sub> H <sub>6</sub> ) <sub>3</sub> } <sup>3+</sup>                  | {C <sub>6</sub> H <sub>6</sub> }                                 | 100.2         | 42.9            | 2.3            | 40.4           |
| <b>4</b>     | {Dy(C <sub>7</sub> H <sub>7</sub> )}                                              | {C <sub>7</sub> H <sub>7</sub> } <sup>3-</sup>                   | 80.8          | 57.0            | 2.2            | 74.0           |
| <b>5</b>     | {Dy(C <sub>8</sub> H <sub>8</sub> ) <sub>2</sub> } <sup>+</sup>                   | {C <sub>8</sub> H <sub>8</sub> } <sup>2-</sup>                   | 42.9          | 31.3            | 1.9            | 86.6           |
| <b>6</b>     | {Dy(C <sub>9</sub> H <sub>9</sub> ) <sub>3</sub> } <sup>2+</sup>                  | {C <sub>9</sub> H <sub>9</sub> } <sup>-</sup>                    | 47.1          | 28.9            | 2.7            | 79.1           |

% contribution to total binding energy =  $(E/E_{tot}) * 100$

Here  $f_1$  and  $f_2$  represents two different fragments for the EDA calculations.

**Table S4:** AILFT computed the Slater Condon parameters  $F^2$ ,  $F^4$ , and  $F^6$ , the one-electron effective parameters for spin-orbit coupling ( $\zeta$ ) for complexes **1-6** at NEVPT2 level of theory. The values in the parenthesis are the CASSCF computed values. All the values provided here are in the cm<sup>-1</sup>.

|         | Dy(III) ion            | 1                      | 2                      | 3                     | 4                      | 5                      | 6                      |
|---------|------------------------|------------------------|------------------------|-----------------------|------------------------|------------------------|------------------------|
| $F^2$   | 109944.1<br>(121779.1) | 107554.8<br>(120594.4) | 107539.3<br>(120548.2) | 108269.8<br>(20974.2) | 107370.3<br>(120501.4) | 107540.5<br>(120568.6) | 107807.3<br>(120729.8) |
| $F^4$   | 70794.3<br>(76392.7)   | 69972.8<br>(75434.4)   | 69953.4<br>(75453.8)   | 70206.1<br>(75752.6)  | 69768.4<br>(75519.5)   | 69846.3<br>(75592.5)   | 70019.8<br>(75722.8)   |
| $F^6$   | 55305.7<br>(54949.3)   | 54658.3<br>(54329.1)   | 54696.4<br>(54344.9)   | 54872.6<br>(54527.4)  | 54629.0<br>(54338.7)   | 54666.4<br>(54379)     | 54763.2<br>(54460.1)   |
| $\zeta$ | 1740.2                 | 1730.5                 | 1729.3                 | 1733.9                | 1728.7                 | 1729.3                 | 1731.0                 |

**Table S5:** AILFT computed the Racah parameters  $E^1$ ,  $E^2$ , and  $E^3$  for complexes **1-6** at NEVPT2 level of theory. The values in the parenthesis are the CASSCF computed values. All the values provided here are in the cm<sup>-1</sup>.

|       | Dy(III) ion        | 1                  | 2                  | 3                  | 4                  | 5                  | 6                  |
|-------|--------------------|--------------------|--------------------|--------------------|--------------------|--------------------|--------------------|
| $E^1$ | 7140.2<br>(7670.5) | 7018.7<br>(7588.3) | 7018.9<br>(7587.6) | 7055.4<br>(7614.9) | 7006.6<br>(7587.3) | 7015.5<br>(7592.6) | 7031.7<br>(7603.7) |
| $E^2$ | 38.5<br>(42.6)     | 37.5<br>(42.2)     | 37.5<br>(42.2)     | 37.8<br>(42.3)     | 37.4<br>(42.1)     | 37.5<br>(42.1)     | 37.6<br>(42.2)     |
| $E^3$ | 716.5<br>(815.9)   | 700.0<br>(808.0)   | 699.7<br>(807.6)   | 704.8<br>(810.6)   | 698.4<br>(807.4)   | 699.6<br>(807.9)   | 701.5<br>(809.0)   |

Supporting Information

The Racah parameters  $E^1$ ,  $E^2$  and  $E^3$  (for f-electrons), can be stated in terms of the Slater-Condon parameters  $F^2$ ,  $F^4$ , and  $F^6$ , using the following equation:

$$F_2 = \frac{F^2}{225} \dots\dots\dots(1)$$

$$F_4 = \frac{F^4}{1089} \dots\dots\dots(2)$$

$$F_6 = \frac{F^6}{7361.64} \dots\dots\dots(3)$$

$$E^1 = \frac{70F_2 + 231F_4 + 2002F_6}{9} \dots\dots\dots(4)$$

$$E^2 = \frac{F_2 - 3F_4 + 7F_6}{9} \dots\dots\dots(5)$$

$$E^3 = \frac{5F_2 + 6F_4 + 91F_6}{3} \dots\dots\dots(6)$$

**Table S6:** Reduction (%) in Slater Condon parameter  $F^2$ ,  $F^4$ , and  $F^6$  and Racah parameters  $E^1$ ,  $E^2$ , and  $E^3$  for complexes **1-6** at NEVPT2 level of theory. The values in the parenthesis are the CASSCF computed values.

|          | $F^2(\%)$ | $F^4(\%)$ | $F^6(\%)$ | $E^1(\%)$ | $E^2(\%)$ | $E^3(\%)$ | $\zeta(\%)$ |
|----------|-----------|-----------|-----------|-----------|-----------|-----------|-------------|
| <b>1</b> | 2.2(1.0)  | 1.2(1.3)  | 1.2(1.1)  | 1.7(1.1)  | 2.6(0.8)  | 2.3(1.0)  | 0.6         |
| <b>2</b> | 2.2(1.0)  | 1.2(1.2)  | 1.1(1.1)  | 1.7(1.1)  | 2.6(0.9)  | 2.4(1.0)  | 0.6         |
| <b>3</b> | 1.5(0.7)  | 0.8(0.8)  | 0.8(0.8)  | 1.2(0.7)  | 1.8(0.6)  | 1.6(0.7)  | 0.4         |
| <b>4</b> | 2.3(1.0)  | 1.4(1.1)  | 1.2(1.1)  | 1.9(1.1)  | 2.7(1.0)  | 2.5(1.0)  | 0.7         |
| <b>5</b> | 2.2(1.0)  | 1.3(1.0)  | 1.2(1.0)  | 1.7(1.0)  | 2.5(1.0)  | 2.4(1.0)  | 0.6         |
| <b>6</b> | 1.9(0.9)  | 1.1(0.9)  | 1.0(0.9)  | 1.5(0.9)  | 2.3(0.9)  | 2.1(0.9)  | 0.5         |

Reduction (%) = [1 - (complex/free-ion)] \* 100

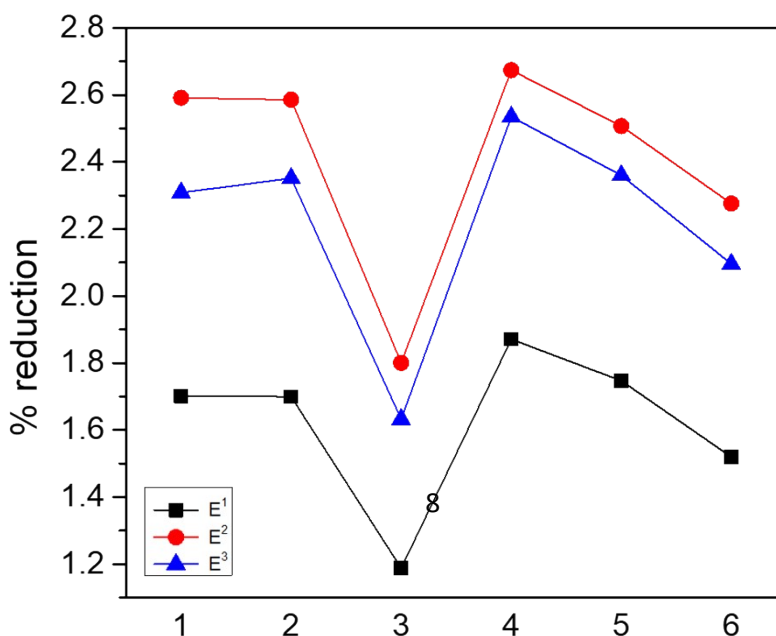



**Figure S2:** AILFT-NEVPT2 computed trends in the reduction (%) in Racah parameters  $E^1$ ,  $E^2$ , and  $E^3$  for complexes 1-6.

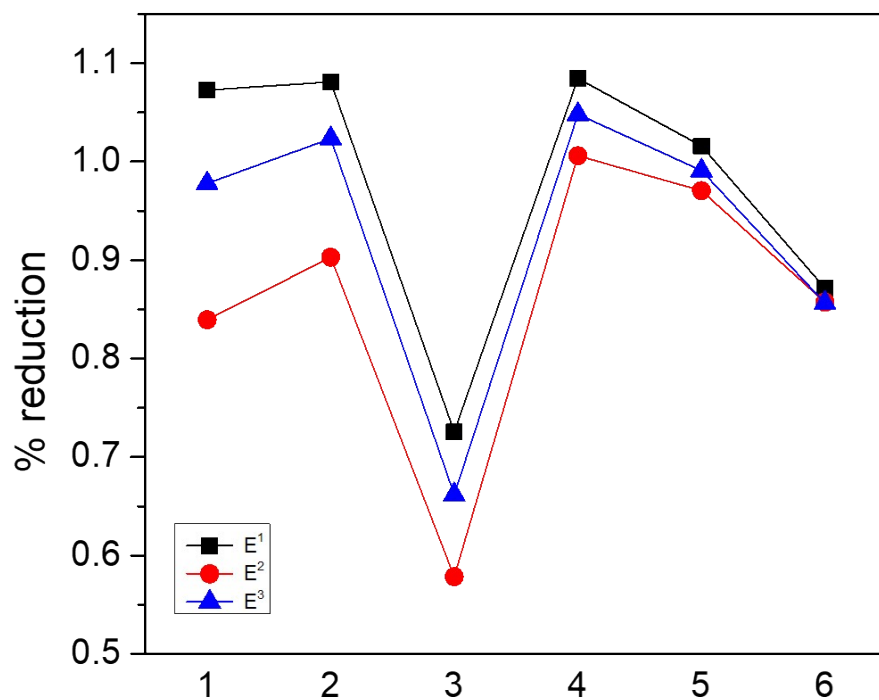

**Figure S3:** AILFT-CASSCF computed trends in the reduction (%) in Racah parameters  $E^1$ ,  $E^2$ , and  $E^3$  for complexes 1-6.

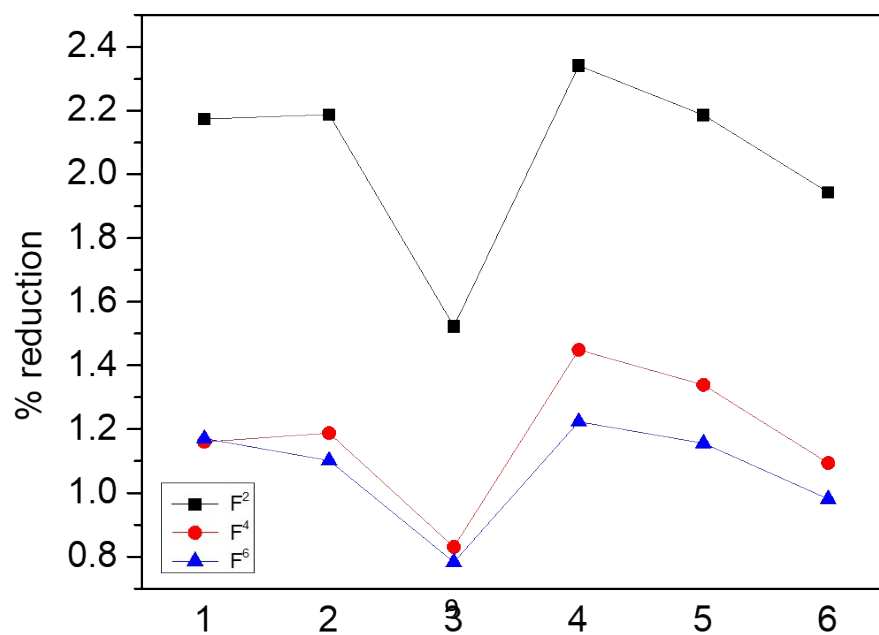

**Figure S4:** AILFT-NEVPT2 computed trends in the reduction (%) in Slater Condon parameters  $F^2$ ,  $F^4$ , and  $F^6$  for complexes 1-6.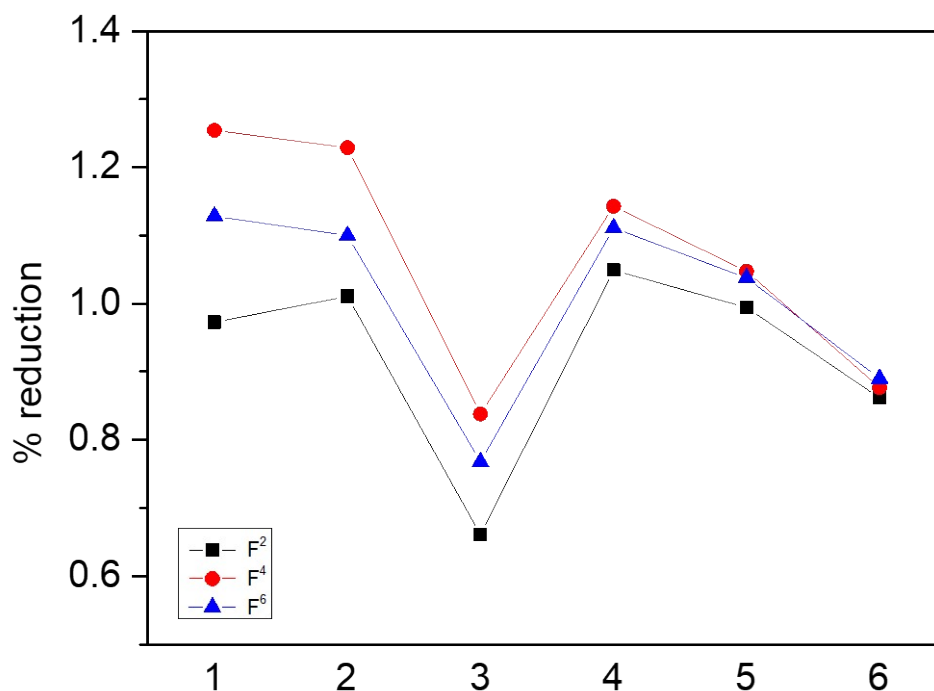**Figure S5:** AILFT-CASSCF computed trends in the reduction (%) in Slater Condon parameters  $F^2$ ,  $F^4$ , and  $F^6$  for complexes 1-6.**Table**

| Complex | Total | 4f   | 5d   | 6s   | 6p   |
|---------|-------|------|------|------|------|
| 1       | 1.24  | 0.14 | 0.69 | 0.35 | 0.59 |
| 2       | 1.19  | 0.14 | 0.95 | 0.32 | 0.41 |
| 3       | 0.54  | 0.27 | 0.84 | 0.45 | 0.90 |
| 4       | 0.71  | 0.19 | 1.39 | 0.20 | 0.51 |
| 5       | 0.64  | 0.41 | 1.29 | 0.10 | 0.56 |
| 6       | 0.58  | 0.53 | 1.27 | 0.06 | 0.56 |

<sup>a</sup>The total charge of the Dy<sup>III</sup> Ion and the electron populations of 4f, 5d, 6p, and 6s orbitals are presented.

**S7:**Comparison of CASSCF-Derived Mulliken Charges<sup>a</sup> for the Dy<sup>III</sup> Ion in complex 1-6.

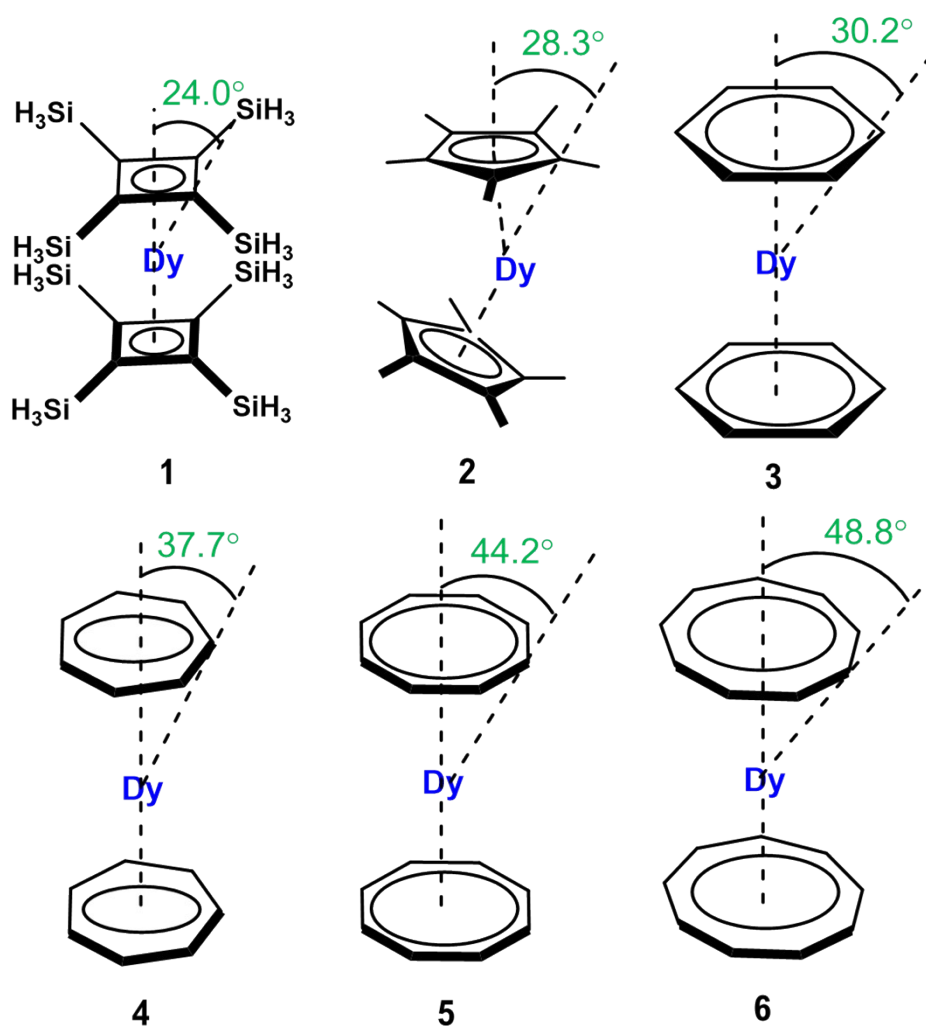

**Scheme S1:** Schematic representation of cone angle ( $\angle L_{\text{cent}}\text{-M-L}$ ) in DFT optimized geometries of **1** – **6** complexes.

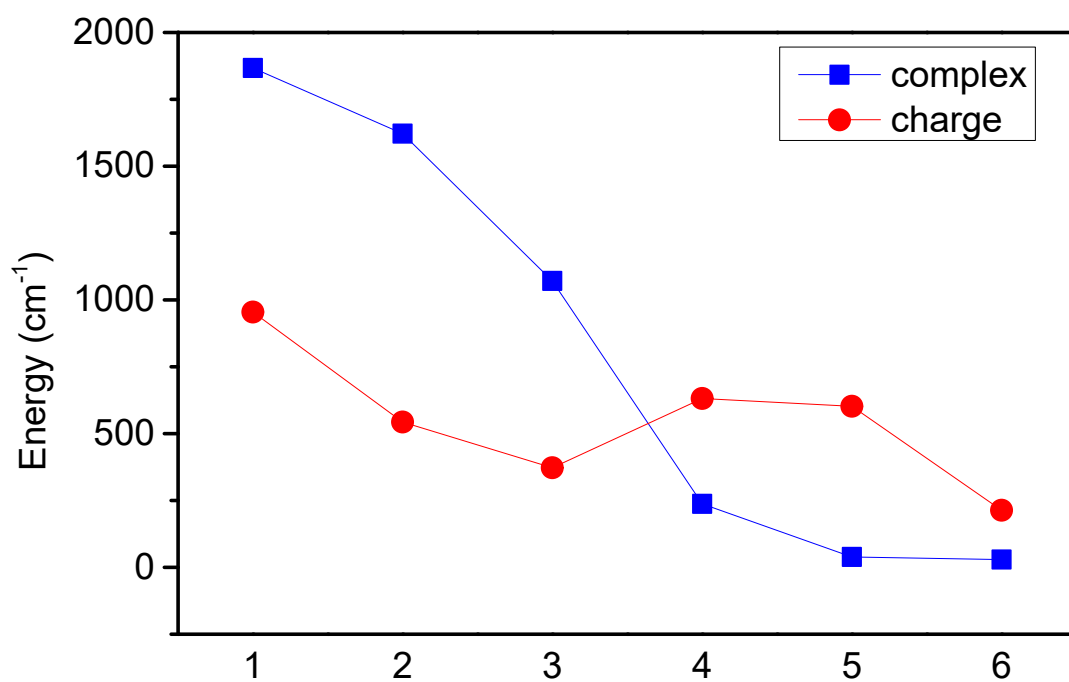

**Figure S6:** CASSCF/NEVPT2 computed the trends of Barrier height ( $U_{cal}$ ) for complexes **1-6** (blue squares) and **1<sub>Q</sub>-6<sub>Q</sub>** (red circles).

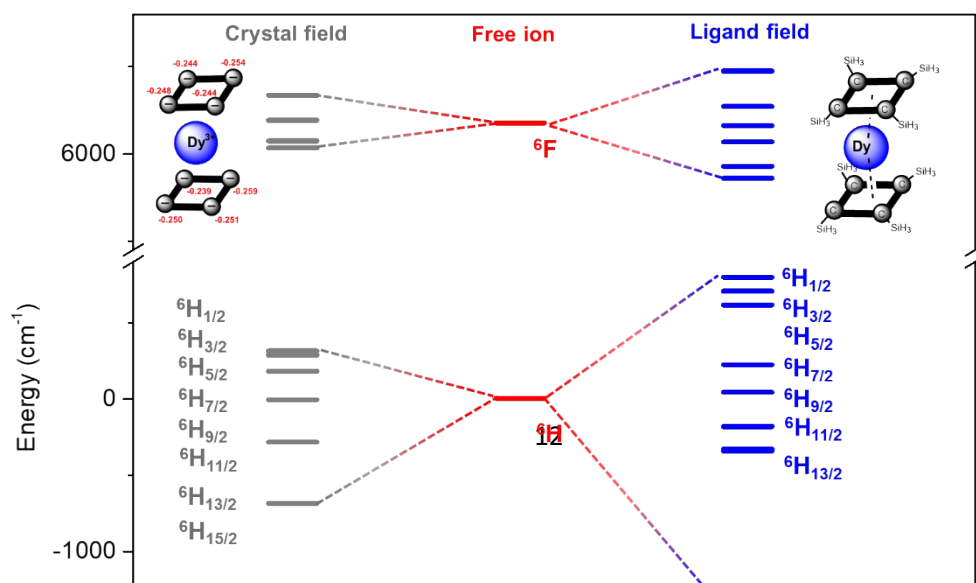

**Figure S7:** CASSCF/NEVPT2 computed Splitting of  ${}^6\text{H}$  and  ${}^6\text{F}$  states under Crystal field (grey bars) and Ligand field (blue bars) for the complex 1.

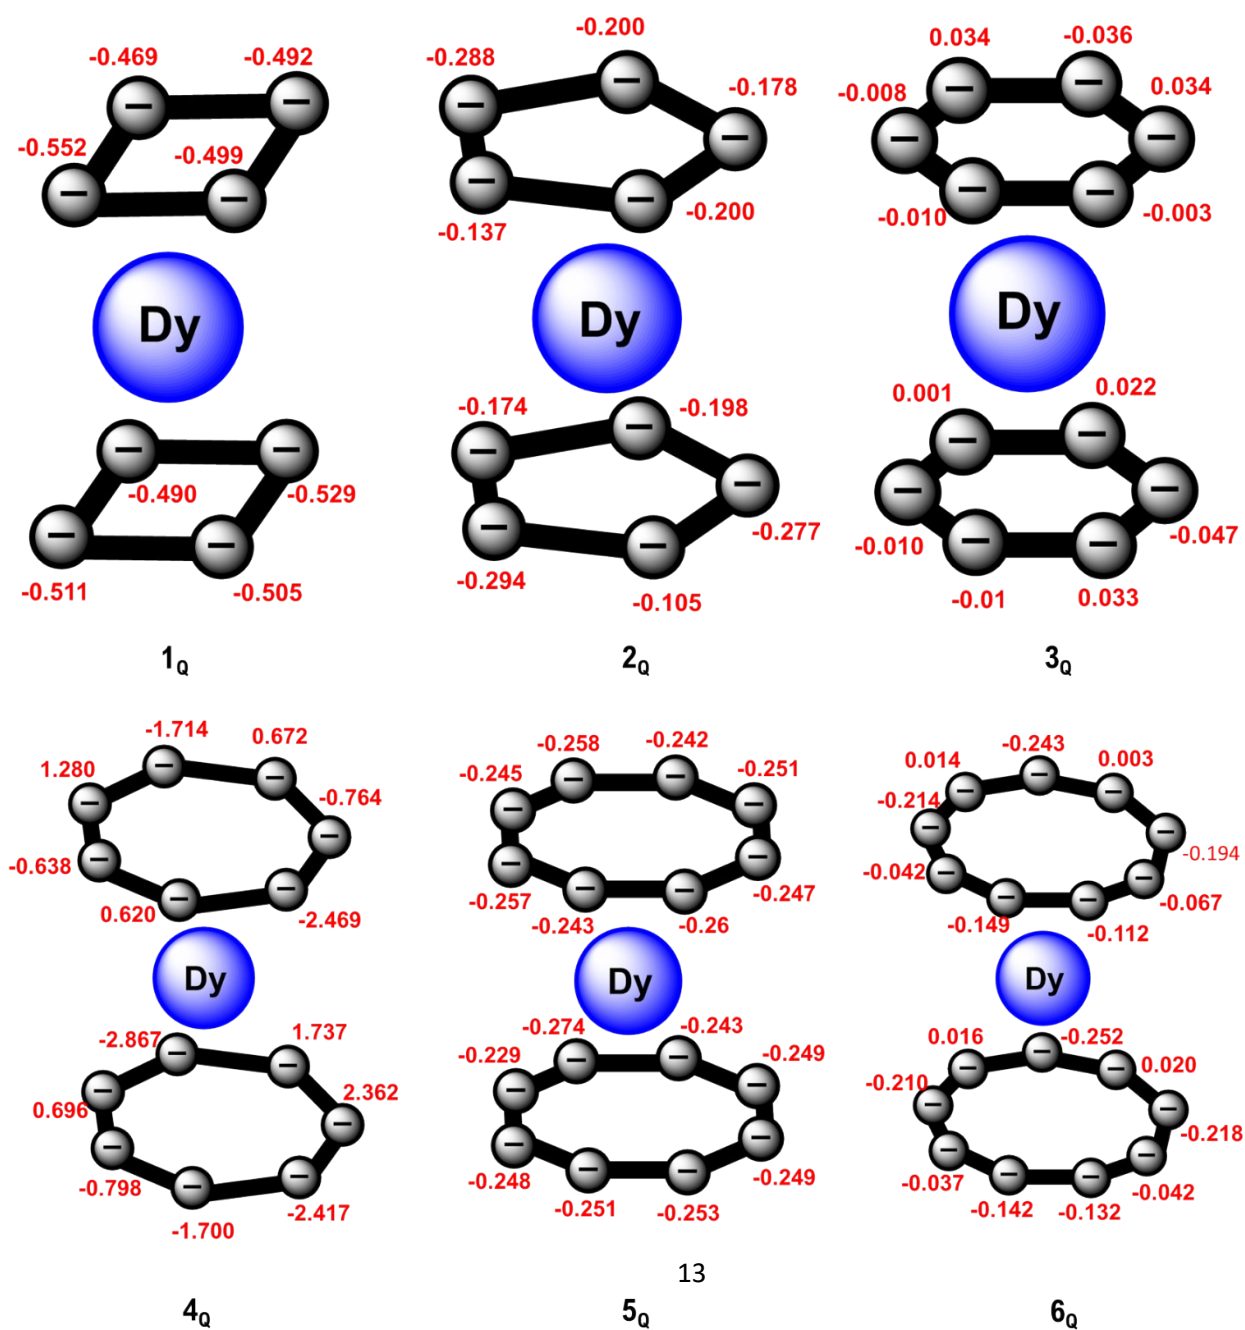

**Figure S8:** DFT computed charges on ligands (by summing up the charges of the atoms attached to the respective carbons of the ring) using CHELPG (CHarges from ELectrostatic Potential Grid) method for complexes 1-6.

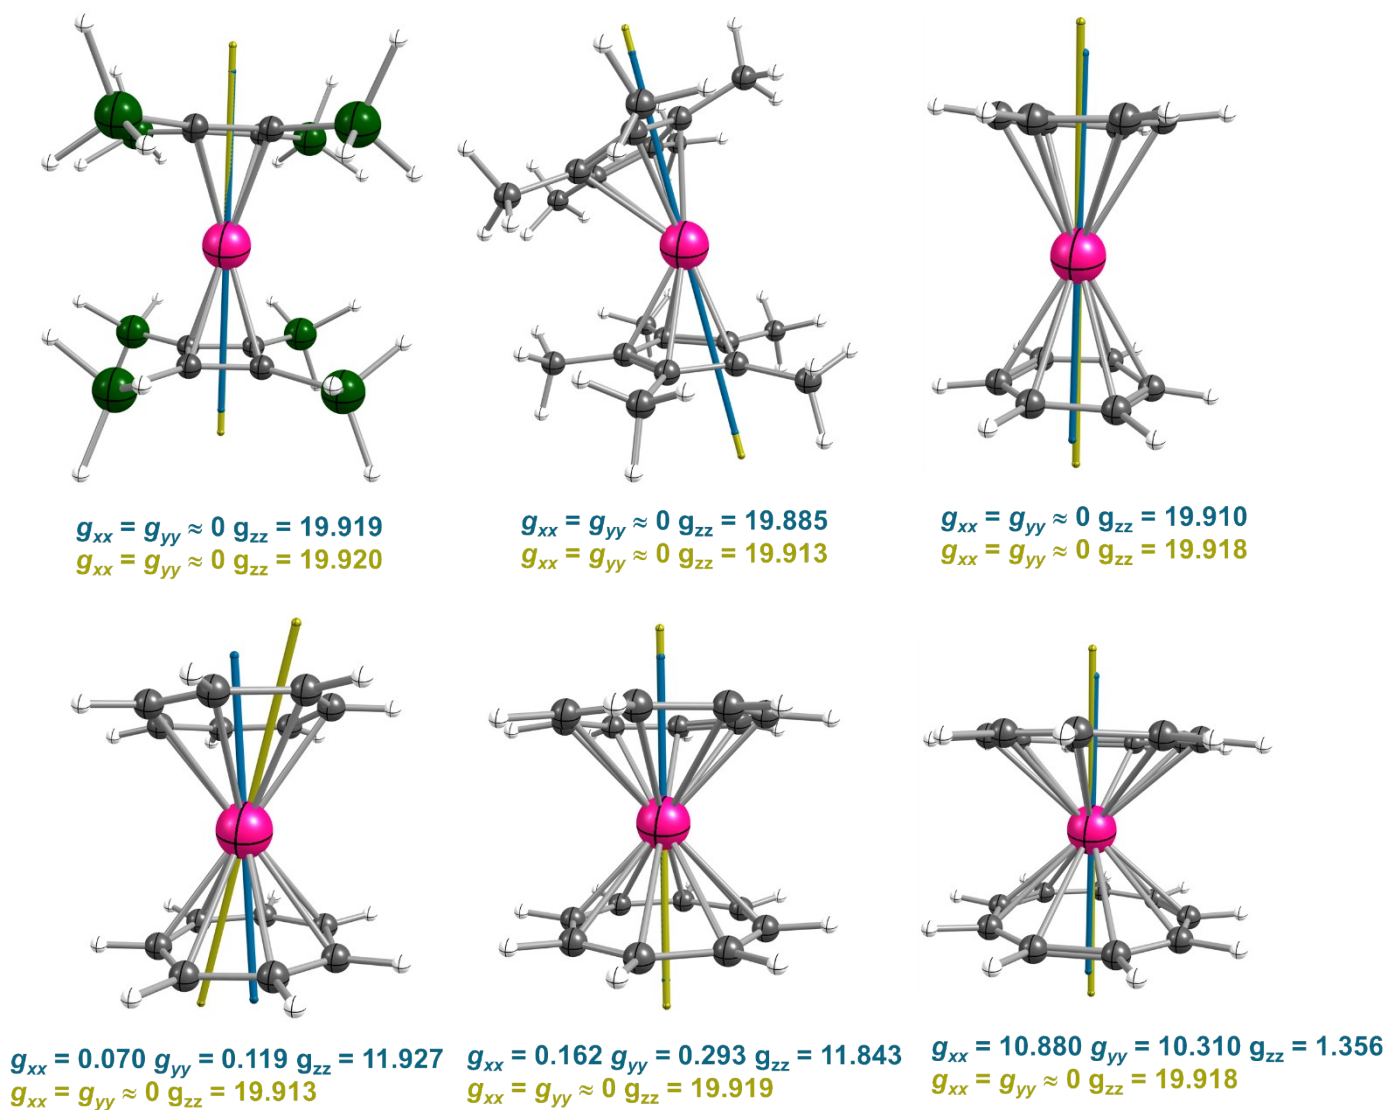

**Figure S9:** SINGLE\_ANISO computed g-tensor orientation along with g-values and wave function decomposition for ground state Kramer doublet for complexes **1-6** (cyan) and **1<sub>Q</sub>-6<sub>Q</sub>** (yellow). The wave function decomposition for **1<sub>Q</sub>-6<sub>Q</sub>** is 100%  $|\pm 15/2\rangle$ . Color code: Dy (magenta); C (grey); Si (green); H (white).

**Table S8:** SINGLE\_ANISO computed the properties of the two lowest Kramers' doublets of the  ${}^6\text{H}_{15/2}$  multiplet in complexes **1<sub>Q</sub>-6<sub>Q</sub>**.

| Complex        | KD  | E / cm <sup>-1</sup> | g <sub>xx</sub> | g <sub>yy</sub> | g <sub>zz</sub> | $\theta$ | K <sub>QTM</sub> | $m_J$              | U <sub>cal</sub> /cm <sup>-1</sup> |
|----------------|-----|----------------------|-----------------|-----------------|-----------------|----------|------------------|--------------------|------------------------------------|
| 1 <sub>Q</sub> | KD1 | 0.0                  | 0.000           | 0.000           | 19.920          | -        | 0.18E-08         | $ \pm 15/2\rangle$ | 954.5                              |
|                | KD2 | 249.4                | 0.000           | 0.000           | 17.140          | 0.0      | 0.16E-07         | $ \pm 13/2\rangle$ |                                    |
| 2 <sub>Q</sub> | KD1 | 0.0                  | 0.000           | 0.000           | 19.913          | -        | 0.61E-07         | $ \pm 15/2\rangle$ | 543.0                              |
|                | KD2 | 138.4                | 0.000           | 0.000           | 17.178          | 0.1      | 0.71E-06         | $ \pm 13/2\rangle$ |                                    |
| 3 <sub>Q</sub> | KD1 | 0.0                  | 0.000           | 0.000           | 19.918          | -        | 0.20E-07         | $ \pm 15/2\rangle$ | 372.5                              |
|                | KD2 | 94.7                 | 0.000           | 0.000           | 17.216          | 3.8      | 0.30E-05         | $ \pm 13/2\rangle$ |                                    |
| 4 <sub>Q</sub> | KD1 | 0.0                  | 0.000           | 0.000           | 19.913          | -        | 0.21E-05         | $ \pm 15/2\rangle$ | 631.2                              |
|                | KD2 | 174.2                | 0.000           | 0.000           | 17.161          | 2.0      | 0.11E-03         | $ \pm 13/2\rangle$ |                                    |
| 5 <sub>Q</sub> | KD1 | 0.0                  | 0.000           | 0.000           | 19.919          | -        | 0.32E-09         | $ \pm 15/2\rangle$ | 602.2                              |
|                | KD2 | 122.2                | 0.000           | 0.000           | 17.205          | 0.4      | 0.80E-07         | $ \pm 13/2\rangle$ |                                    |
| 6 <sub>Q</sub> | KD1 | 0.0                  | 0.000           | 0.000           | 19.918          | -        | 0.20E-05         | $ \pm 15/2\rangle$ | 213.7                              |
|                | KD2 | 32.1                 | 0.000           | 0.000           | 17.247          | 0.7      | 0.24E-04         | $ \pm 13/2\rangle$ |                                    |

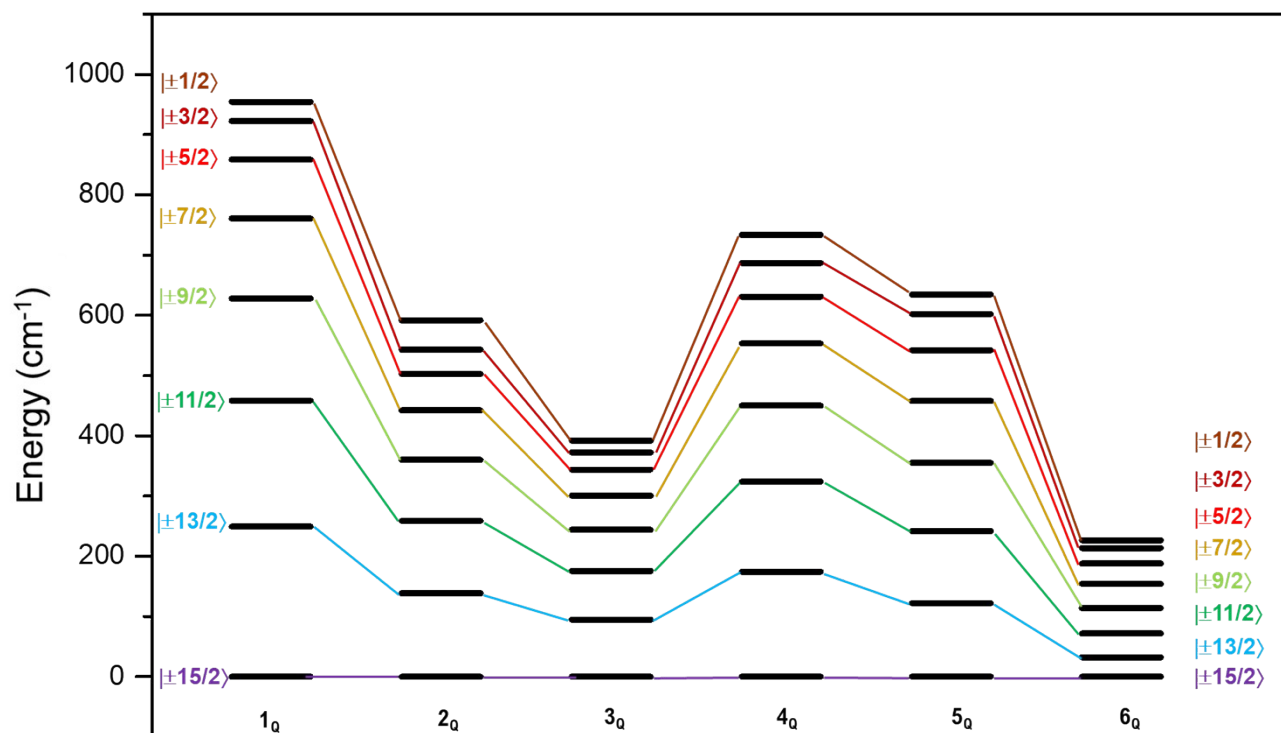

**Figure S10:** CASSCF/NEVPT2 computed the trends of Kramer's Doublets (in  $\text{cm}^{-1}$ ) for  $1_Q$ - $6_Q$ .

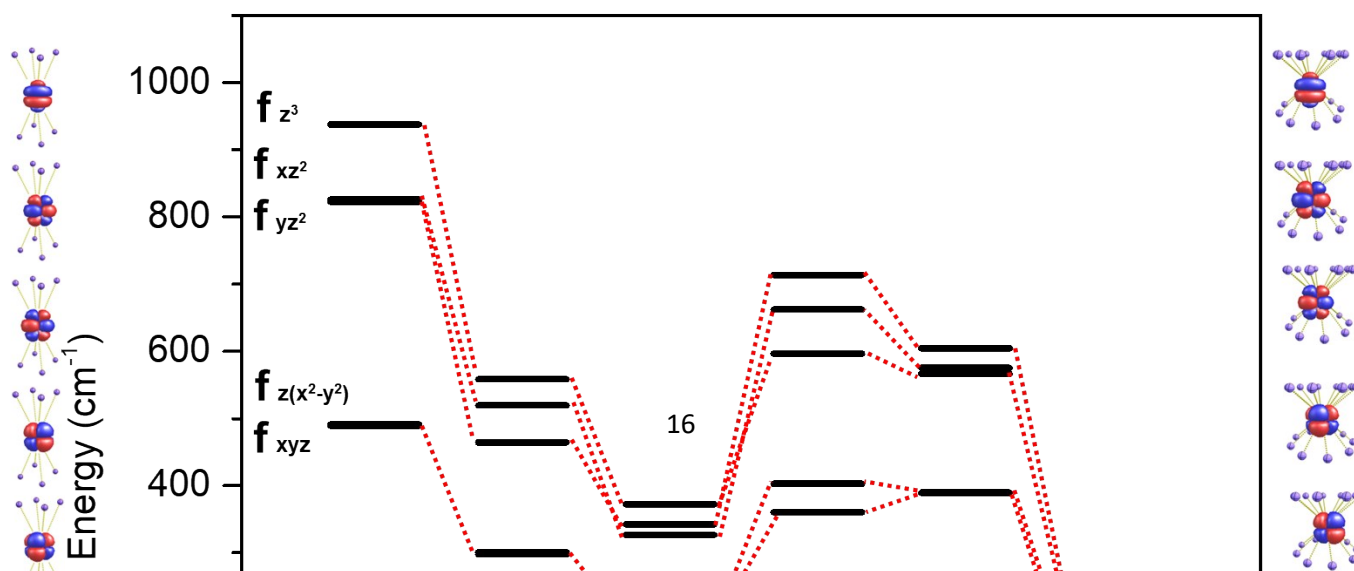



**Figure S11:** AILFT-NEVPT2 splitting pattern of 4*f* orbitals in complexes **1Q-6Q**.**Table S9:** SINGLE\_ANISO computed the properties of the two lowest Kramers' doublets of the  ${}^6\text{H}_{15/2}$  multiplet for  $[\text{Dy}(\text{CH}_3)_2]^+$  and  $[\text{Dy}(\text{CH}_3)_4]^-$ .

| Complex                        | KD  | E / $\text{cm}^{-1}$ | $g_{xx}$ | $g_{yy}$ | $g_{zz}$ | $\theta$ | $K_{\text{QTM}}$ | $m_J$              | $U_{\text{cal}}/\text{cm}^{-1}$ |
|--------------------------------|-----|----------------------|----------|----------|----------|----------|------------------|--------------------|---------------------------------|
| $[\text{Dy}(\text{CH}_3)_2]^+$ | KD1 | 0.0                  | 0.0000   | 0.0000   | 19.9127  | -        | 0.173E-08        | $ \pm 15/2\rangle$ | 3022.6                          |
|                                | KD2 | 824.4                | 0.0000   | 0.0000   | 16.7536  | 0.0      | 0.16E-05         | $ \pm 13/2\rangle$ |                                 |
| $[\text{Dy}(\text{CH}_3)_4]^-$ | KD1 | 0.0                  | 12.214   | 8.646    | 1.131    | -        | 0.35E+01         | $ \pm 1/2\rangle$  | 63.5                            |
|                                | KD2 | 63.5                 | 9.381    | 6.084    | 2.258    | 0.0      | 0.26E+01         | $ \pm 3/2\rangle$  |                                 |

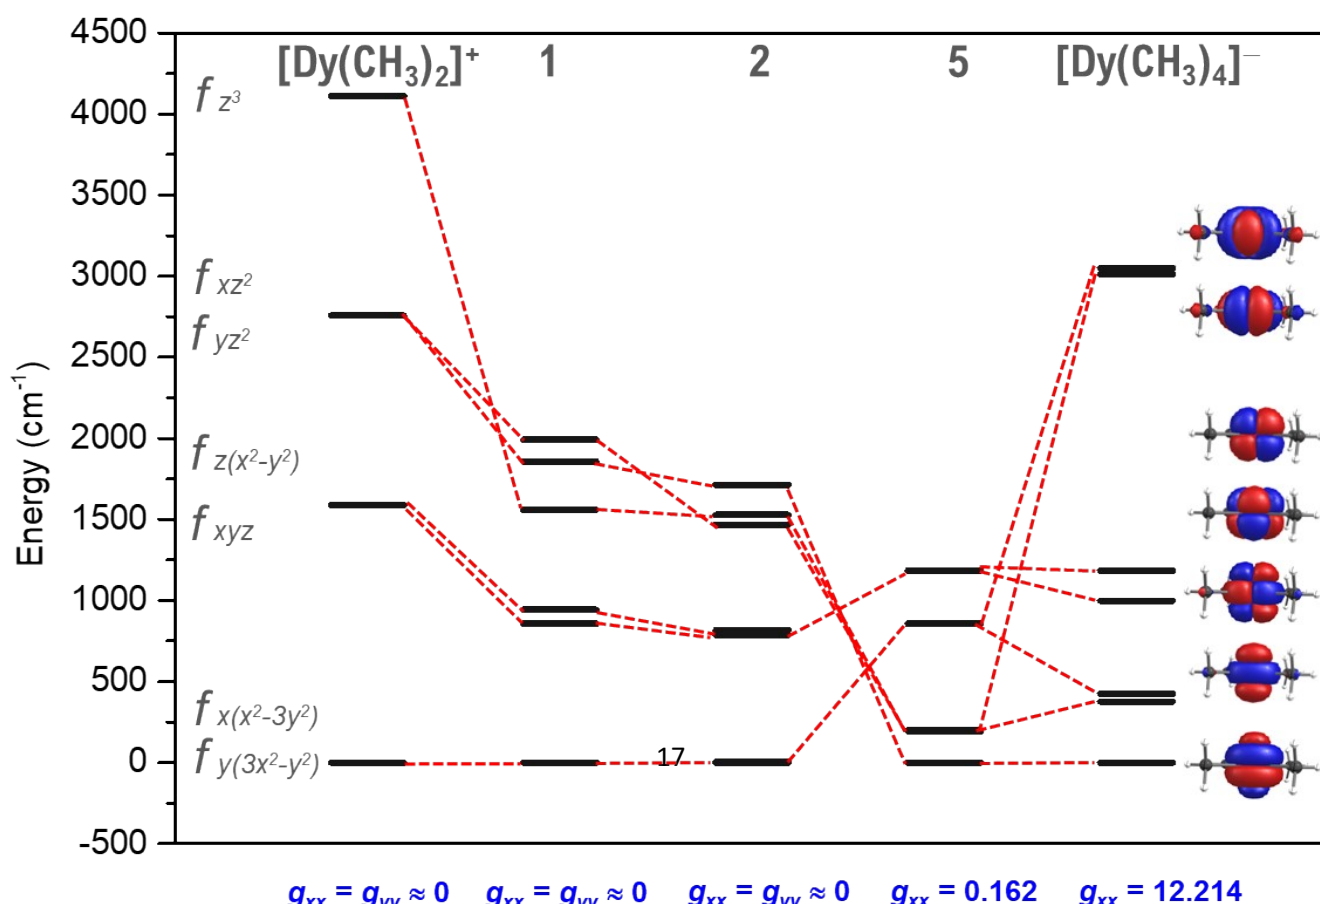

**Figure S12:** AILFT-NEVPT2 computed splitting pattern of 4*f* orbitals in [Dy(CH<sub>3</sub>)<sub>2</sub>]<sup>+</sup>, [Dy(C<sub>4</sub>(SiH<sub>3</sub>)<sub>4</sub>)<sub>2</sub>]<sup>-</sup> (**1**), [Dy(C<sub>5</sub>(CH<sub>3</sub>)<sub>5</sub>)<sub>2</sub>]<sup>+</sup> (**2**), [Dy(C<sub>8</sub>H<sub>8</sub>)<sub>2</sub>]<sup>-</sup> (**5**) and [Dy(CH<sub>3</sub>)<sub>4</sub>]<sup>-</sup> along with the *g* values for ground state KDs.

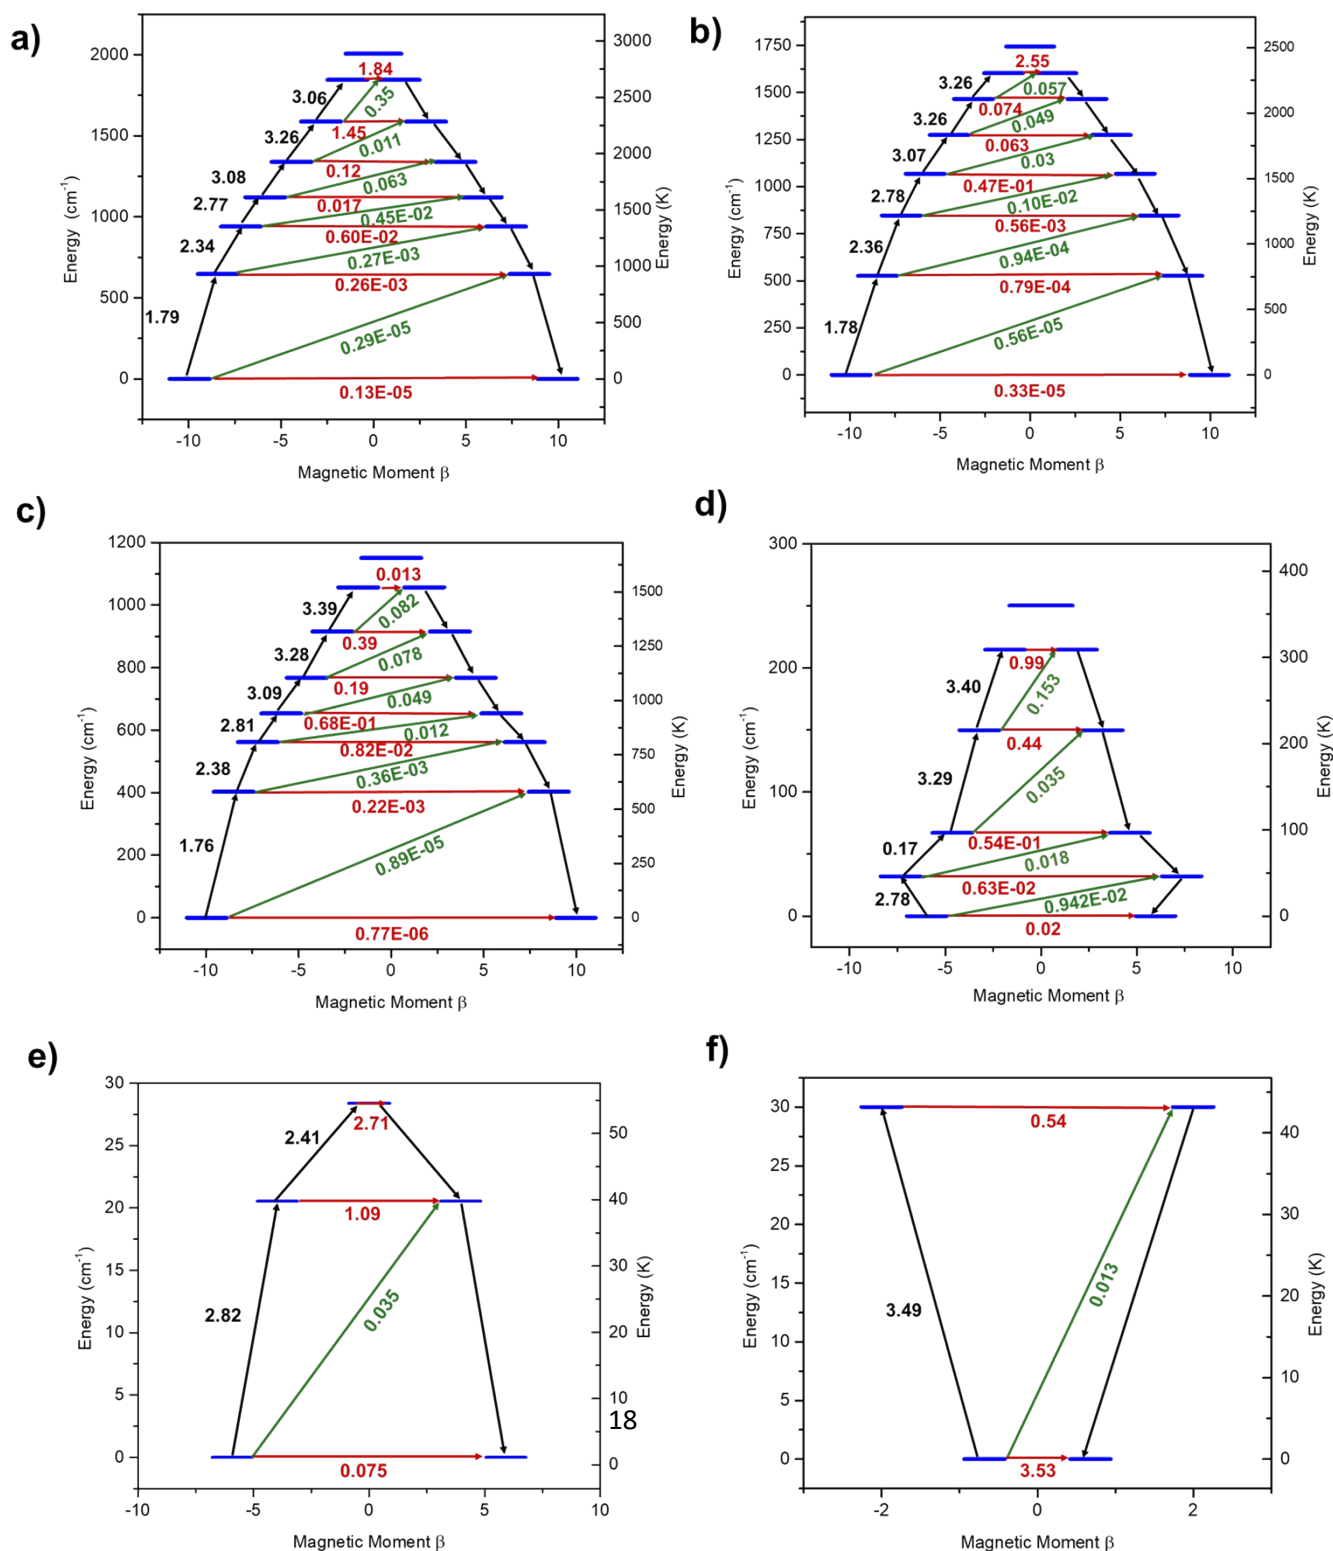

**Figure S13:** *Ab-Initio* computed blockade barrier for magnetic relaxation for complexes **1-6**. The blue line indicates the KDs as a function of magnetic moments. The black, red, and green lines represent thermal, QTM, and possible Orbach relaxations.

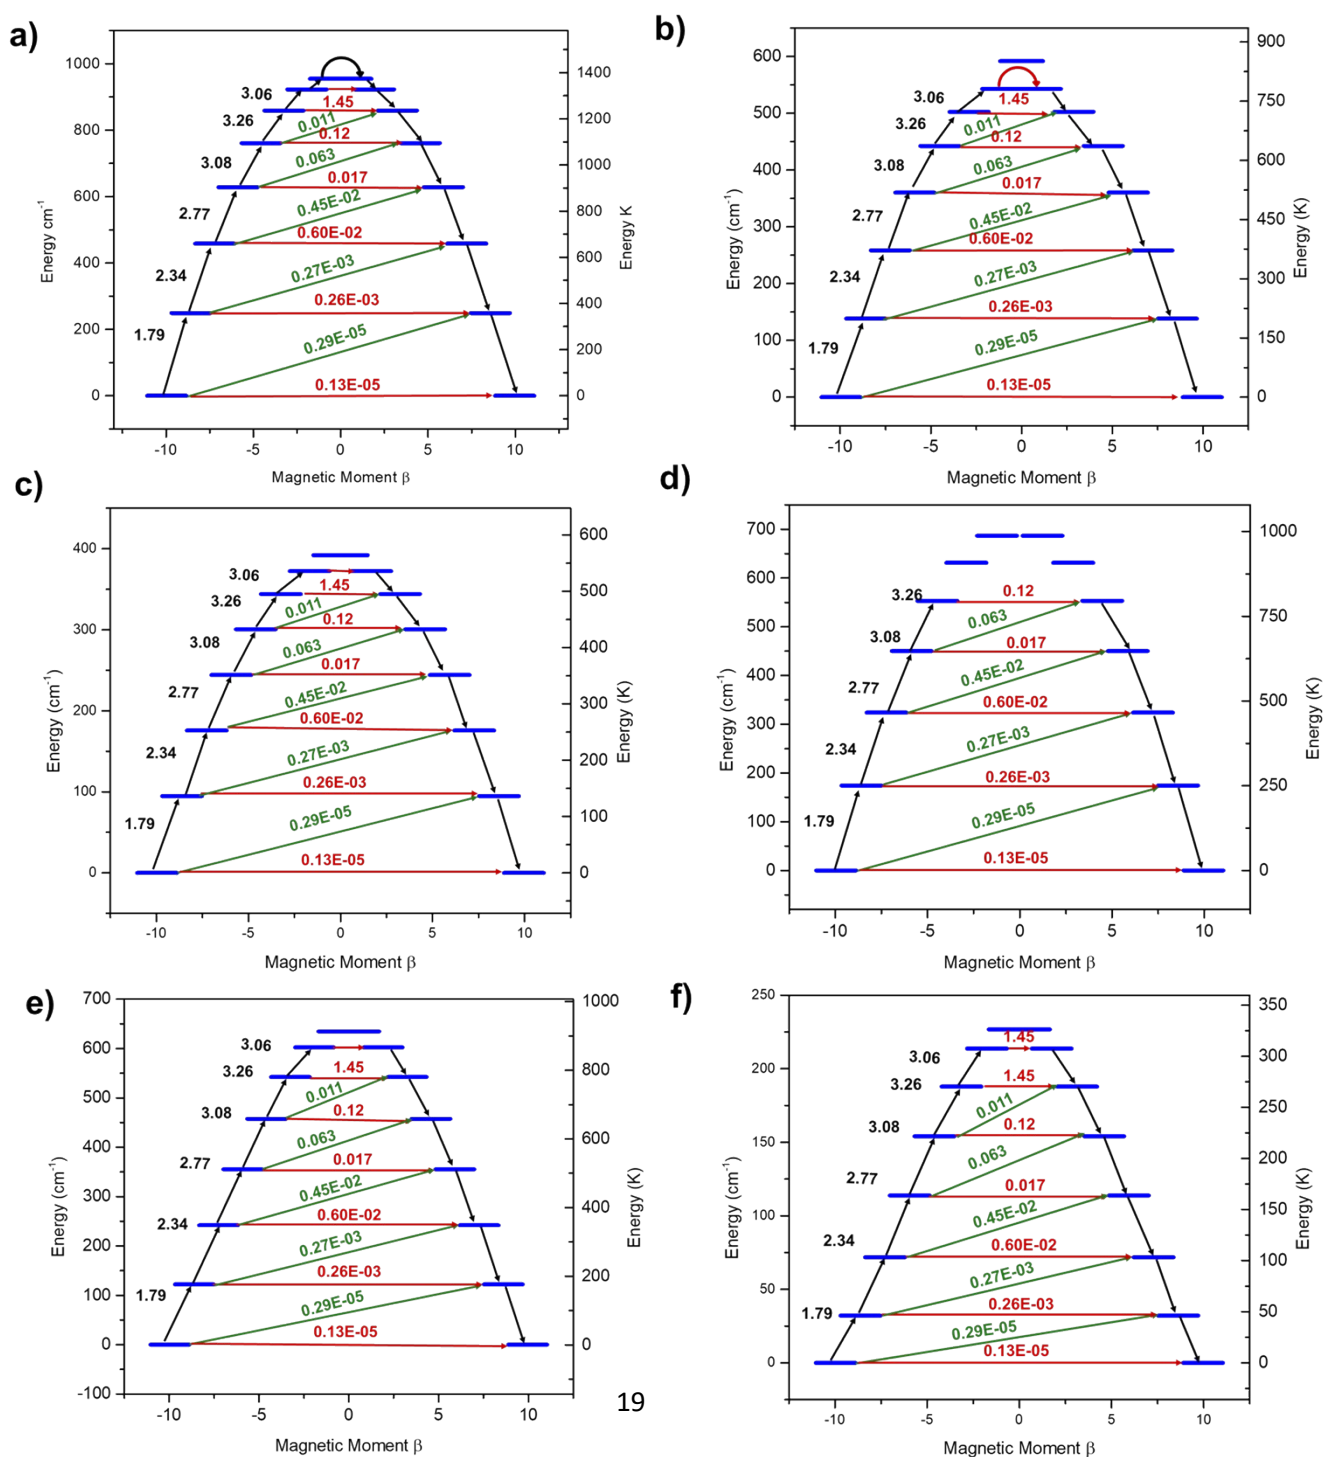

**Figure S14:** *Ab-Initio* computed blockade barrier for magnetic relaxation for  $1Q-6Q$ . The blue line indicates the KDs as a function of magnetic moments. The black, red, and green lines represent thermal, QTM, and possible Orbach relaxations.

**Table S10:** CASSCF computed 21 roots of sextet (red) along with 224 roots of quartet and 490 roots of doublet states for  $[Dy(C_4(SiH_3)_4)_2]^-$  complex. All the values are reported herein  $cm^{-1}$ .

| 1                |         |         |         |         |         |          |
|------------------|---------|---------|---------|---------|---------|----------|
| Spin free States |         |         |         |         |         |          |
| CASSCF           |         |         |         |         |         |          |
| 0.0              | 34532.6 | 44053.5 | 55693.1 | 64401.5 | 86308.5 | 101789.6 |
| 1065.7           | 34533.5 | 44088.2 | 55712.3 | 66594.9 | 86357.7 | 101791.4 |
| 1067.0           | 34645.8 | 44088.2 | 55723.1 | 66766.3 | 86372.3 | 101814.7 |
| 1128.3           | 34645.9 | 44238.9 | 55760.0 | 67390.3 | 86801.4 | 102689.6 |
| 1132.8           | 34786.6 | 44239.4 | 55780.4 | 67463.8 | 86805.0 | 102785.1 |
| 1474.1           | 34885.7 | 44271.3 | 55841.4 | 67515.5 | 86842.7 | 102825.0 |
| 1549.9           | 34901.7 | 44271.3 | 55848.7 | 67676.6 | 86908.5 | 102980.8 |
| 1862.2           | 34912.4 | 44691.9 | 55974.3 | 67703.5 | 86967.7 | 103008.6 |
| 1950.0           | 34920.0 | 44725.2 | 55977.0 | 67927.7 | 87083.3 | 103177.8 |
| 2031.1           | 35030.8 | 44789.1 | 56135.4 | 67929.8 | 87087.8 | 103181.1 |
| 8350.3           | 35042.0 | 44929.6 | 56135.7 | 68254.2 | 87335.8 | 103335.2 |
| 8402.0           | 37071.2 | 44967.9 | 56196.8 | 68254.7 | 87346.4 | 103335.3 |
| 8542.3           | 37071.3 | 45056.9 | 56287.1 | 68651.1 | 87428.8 | 103804.9 |
| 8583.5           | 37182.9 | 45057.1 | 56287.2 | 68828.2 | 87460.5 | 103804.9 |
| 8614.1           | 37183.1 | 45062.8 | 56364.0 | 68828.2 | 87505.9 | 105046.2 |
| 8837.6           | 37346.9 | 45095.5 | 56364.2 | 69731.0 | 87715.2 | 105351.9 |
| 8838.5           | 37369.4 | 45157.9 | 56409.8 | 69731.3 | 87715.8 | 105457.0 |
| 33852.6          | 37381.9 | 45163.7 | 56442.8 | 69745.4 | 87722.6 | 105893.7 |
| 35810.4          | 37405.5 | 45280.2 | 56449.0 | 69745.4 | 87729.6 | 105941.3 |
| 35985.1          | 37405.5 | 45293.8 | 56452.6 | 69759.4 | 88284.5 | 106303.0 |
| 24616.7          | 37441.6 | 45335.1 | 56588.4 | 69760.0 | 88284.9 | 106380.1 |
| 24616.7          | 37442.1 | 45335.6 | 56588.7 | 69877.7 | 88624.0 | 106437.0 |
| 24952.5          | 37472.8 | 45340.9 | 56595.3 | 69877.7 | 88624.0 | 106505.2 |
| 24954.1          | 37525.2 | 45341.0 | 56596.4 | 69880.3 | 89050.7 | 106507.0 |
| 25009.5          | 37644.3 | 45384.7 | 56652.7 | 69886.4 | 89050.8 | 106551.7 |
| 25048.0          | 37645.1 | 45385.3 | 56658.8 | 69950.1 | 89230.6 | 106552.0 |
| 25077.8          | 37654.5 | 45438.7 | 56719.6 | 69950.1 | 89230.6 | 106561.1 |
| 25114.6          | 37658.5 | 45644.8 | 56719.8 | 70030.2 | 89399.0 | 106578.3 |
| 25127.2          | 37732.7 | 45645.9 | 56772.0 | 70034.3 | 89399.0 | 107494.8 |
| 25152.4          | 37765.3 | 45645.9 | 56772.0 | 70074.0 | 93476.6 | 107497.5 |
| 25154.3          | 37769.7 | 45733.1 | 56885.9 | 71037.7 | 93477.2 | 108327.4 |
| 25299.0          | 37842.3 | 46212.8 | 56905.8 | 71095.2 | 93676.9 | 108328.2 |
| 25301.7          | 37875.6 | 46212.8 | 56906.3 | 71188.3 | 93711.2 | 110011.0 |
| 25306.9          | 37953.9 | 46473.8 | 56912.7 | 71996.1 | 93890.5 | 110012.4 |
| 25309.5          | 38096.8 | 46548.3 | 56914.6 | 72044.7 | 93976.2 | 110794.2 |
| 25642.7          | 38345.5 | 46751.6 | 56922.0 | 73337.6 | 93981.8 | 110815.4 |
| 25645.0          | 38407.5 | 47508.3 | 56930.4 | 73386.6 | 95212.0 | 111010.9 |
| 25665.8          | 38411.9 | 47551.7 | 56943.6 | 73568.3 | 95212.1 | 111080.6 |
| 25667.6          | 38550.7 | 47598.1 | 56952.9 | 73644.1 | 95514.8 | 111217.7 |
| 25673.9          | 38561.0 | 47676.4 | 56953.2 | 73732.5 | 95532.0 | 114011.9 |
| 25675.8          | 38773.0 | 47679.2 | 56978.8 | 73817.5 | 95535.1 | 115398.2 |
| 25689.0          | 38773.0 | 47745.8 | 56982.0 | 73834.1 | 95537.3 | 115569.6 |
| 25699.5          | 38792.1 | 47746.9 | 57021.4 | 73872.8 | 95594.9 | 119563.3 |
| 25711.6          | 38792.2 | 47747.0 | 57075.0 | 76790.3 | 95595.7 | 119589.9 |
| 25717.9          | 39064.7 | 47758.9 | 57077.0 | 76795.4 | 95697.9 | 119691.6 |
| 25748.4          | 39079.7 | 47839.8 | 57078.0 | 76802.3 | 95732.7 | 119823.2 |
| 25752.4          | 39100.3 | 47867.3 | 57088.8 | 76819.2 | 95870.2 | 119861.1 |
| 25759.6          | 39132.2 | 47915.2 | 57088.9 | 76839.3 | 95871.7 | 120138.3 |
| 25773.7          | 39152.0 | 47983.3 | 57597.8 | 76857.5 | 95884.2 | 120143.0 |
| 25777.9          | 39188.7 | 48001.6 | 57603.4 | 76858.9 | 96087.4 | 120495.1 |

## Supporting Information

|         |         |         |         |         |          |          |
|---------|---------|---------|---------|---------|----------|----------|
| 25789.5 | 39246.2 | 48140.8 | 57653.5 | 77215.4 | 96104.4  | 120495.5 |
| 25797.7 | 39264.3 | 48143.9 | 57653.5 | 77215.9 | 96144.8  | 120889.6 |
| 25799.3 | 39268.6 | 48203.3 | 58058.8 | 77293.3 | 96189.2  | 120889.6 |
| 25856.0 | 39273.7 | 48203.6 | 58067.2 | 77293.4 | 96220.3  | 121393.2 |
| 25863.1 | 39277.4 | 48380.1 | 58094.6 | 77450.3 | 96253.6  | 121393.2 |
| 25974.4 | 41743.3 | 48380.4 | 58098.4 | 77965.9 | 96277.0  | 122320.5 |
| 25974.4 | 41836.8 | 48597.7 | 58277.5 | 77967.1 | 96288.2  | 122320.5 |
| 26277.1 | 41842.4 | 48598.0 | 58393.2 | 78660.4 | 96348.1  | 122346.0 |
| 26278.5 | 41842.6 | 48714.5 | 58417.3 | 78676.2 | 96582.8  | 122381.8 |
| 26509.8 | 41850.1 | 48714.5 | 58465.0 | 79379.2 | 96583.1  | 123629.4 |
| 26509.8 | 41894.1 | 49112.4 | 58465.5 | 79416.9 | 96612.6  | 123723.5 |
| 26897.4 | 41899.5 | 49112.4 | 59053.2 | 79452.1 | 96642.8  | 123965.9 |
| 26900.5 | 41920.0 | 49551.1 | 59053.9 | 79452.1 | 96645.9  | 131562.1 |
| 26930.8 | 41964.5 | 49551.1 | 59070.7 | 79476.0 | 96759.7  | 131922.7 |
| 26931.2 | 41975.6 | 50042.4 | 59107.6 | 79783.5 | 96834.5  | 132055.5 |
| 27119.4 | 42044.4 | 50042.4 | 59167.0 | 79783.6 | 96977.3  | 132667.1 |
| 27172.7 | 42045.8 | 50282.1 | 59360.0 | 79914.8 | 97004.7  | 132698.7 |
| 27192.7 | 42289.2 | 50282.1 | 59536.0 | 79918.9 | 97005.6  | 134034.5 |
| 29501.5 | 42289.2 | 51730.1 | 59536.9 | 79928.0 | 97018.7  | 134035.8 |
| 29501.5 | 42516.1 | 51751.7 | 59673.9 | 79975.4 | 97104.0  | 139226.1 |
| 29837.0 | 42561.7 | 51754.9 | 59785.8 | 79980.1 | 97104.0  | 139226.3 |
| 29837.7 | 42561.7 | 51799.4 | 60185.0 | 79980.2 | 97213.6  | 139739.8 |
| 29855.2 | 42571.7 | 51807.8 | 60185.0 | 79997.2 | 97306.8  | 139739.9 |
| 29858.1 | 42704.9 | 51844.7 | 60273.5 | 80001.5 | 97346.7  | 140578.7 |
| 29875.8 | 42717.2 | 51894.4 | 60303.2 | 80009.9 | 97422.6  | 140585.9 |
| 29876.8 | 42736.1 | 51903.1 | 60305.8 | 80121.0 | 97480.4  | 140895.9 |
| 29929.5 | 42736.1 | 51911.6 | 60320.7 | 80123.9 | 97484.5  | 140968.3 |
| 29929.5 | 42778.3 | 51970.2 | 60682.8 | 80155.7 | 97487.0  | 140968.9 |
| 30070.2 | 42778.3 | 51971.2 | 60686.4 | 80162.5 | 97493.0  | 142256.0 |
| 30087.2 | 43122.4 | 52144.4 | 60754.7 | 80174.0 | 97583.4  | 142401.9 |
| 30262.7 | 43143.5 | 52144.5 | 60830.5 | 80186.7 | 97710.5  | 143839.3 |
| 30279.0 | 43209.9 | 52301.5 | 60832.6 | 80186.9 | 97721.7  | 145756.0 |
| 30323.2 | 43218.0 | 52372.5 | 61245.8 | 80293.9 | 97723.4  | 145756.1 |
| 31388.6 | 43451.5 | 52395.1 | 61265.4 | 80296.0 | 98130.1  | 146560.7 |
| 31424.3 | 43476.6 | 52523.3 | 61723.1 | 80506.6 | 98130.2  | 146563.1 |
| 31428.7 | 43489.7 | 52556.1 | 61723.2 | 80506.6 | 98292.0  | 146946.4 |
| 31468.3 | 43491.1 | 52665.4 | 61785.0 | 80681.5 | 98424.1  | 146975.1 |
| 31468.3 | 43510.1 | 52669.0 | 61809.3 | 80681.6 | 98750.9  | 146986.0 |
| 31522.7 | 43514.0 | 52743.1 | 61859.6 | 80812.9 | 98750.9  | 147038.6 |
| 31540.6 | 43547.4 | 52743.3 | 61947.6 | 80812.9 | 99330.9  | 147040.9 |
| 31636.2 | 43547.4 | 52753.9 | 61959.8 | 81013.7 | 99330.9  | 147047.3 |
| 31636.8 | 43549.1 | 52754.0 | 62195.7 | 81013.7 | 99378.2  | 147054.9 |
| 31650.5 | 43552.8 | 52775.8 | 62196.5 | 81388.0 | 99378.2  | 173538.9 |
| 31651.2 | 43555.8 | 52776.0 | 62556.2 | 81388.0 | 99465.1  | 173676.5 |
| 31715.1 | 43580.5 | 53238.5 | 62556.3 | 84290.2 | 99470.5  | 173967.8 |
| 31715.9 | 43620.4 | 53238.5 | 63022.9 | 84778.9 | 100943.0 | 175049.2 |
| 31744.8 | 43637.3 | 54707.1 | 63022.9 | 84896.0 | 100943.0 | 175111.5 |
| 31745.0 | 43668.0 | 55001.5 | 63315.3 | 85849.6 | 101154.7 | 177865.7 |
| 31759.5 | 43669.1 | 55008.8 | 63315.3 | 85905.7 | 101154.8 | 178183.2 |
| 31759.6 | 43704.7 | 55134.9 | 64131.6 | 86027.9 | 101486.5 | 178188.0 |
| 33114.6 | 43759.2 | 55140.5 | 64138.4 | 86048.4 | 101486.6 | 178237.4 |
| 33139.6 | 43761.1 | 55469.2 | 64192.8 | 86204.8 | 101736.6 | 178367.9 |
| 33222.9 | 43808.7 | 55490.0 | 64227.5 | 86274.4 | 101742.7 | 179895.4 |
| 33273.2 | 43865.2 | 55560.4 | 64234.7 | 86276.7 | 101778.2 | 180005.6 |
| 33380.1 | 44053.5 | 55560.5 | 64257.8 | 86306.2 | 101780.4 |          |

**Table S13:** NEVPT2 computed 21 roots of sextet (red) along with 224 roots of quartet and 490 roots of doublet states for  $[\text{Dy}(\text{C}_4(\text{SiH}_3)_2)_2]^-$  complex. All the values are reported herein  $\text{cm}^{-1}$ .

| 1                |         |         |         |         |         |         |
|------------------|---------|---------|---------|---------|---------|---------|
| Spin free States |         |         |         |         |         |         |
| NEVPT2           |         |         |         |         |         |         |
| 0.1              | 33248.2 | 43969.3 | 52843.2 | 59885.9 | 79879.6 | 94408.9 |
| 1031.7           | 33249.2 | 43978.3 | 52857.7 | 60422.7 | 79939.8 | 94425.3 |
| 1044.8           | 33463.8 | 43996.5 | 52943.9 | 60634.5 | 79956.4 | 94430.7 |
| 1213.8           | 33464.1 | 44010.0 | 52951.6 | 62643.2 | 79973.6 | 94436.5 |
| 1217.7           | 33563.6 | 44014.5 | 52965.9 | 63522.1 | 79976.2 | 94709.9 |
| 1421.0           | 33719.6 | 44105.2 | 53029.9 | 63628.1 | 80048.3 | 94858.2 |
| 1604.6           | 33749.6 | 44335.4 | 53154.3 | 63684.4 | 80052.7 | 94897.5 |
| 2008.1           | 33781.7 | 44335.5 | 53309.5 | 63874.9 | 80120.5 | 94898.6 |
| 2097.3           | 33786.0 | 44574.6 | 53311.0 | 63924.7 | 80315.6 | 95036.5 |
| 2190.5           | 33934.6 | 44574.6 | 53402.9 | 64148.0 | 80328.5 | 95063.0 |
| 7117.8           | 33970.2 | 44641.1 | 53416.2 | 64152.2 | 81000.4 | 95121.8 |
| 7188.5           | 34672.3 | 44641.1 | 53717.6 | 64449.7 | 81002.1 | 95285.6 |
| 7332.7           | 34893.5 | 44651.8 | 53915.2 | 64451.2 | 81032.4 | 95291.8 |
| 7427.8           | 35056.0 | 44654.4 | 53921.3 | 65086.1 | 81052.5 | 95442.5 |

Supporting Information

|         |         |         |         |         |         |          |
|---------|---------|---------|---------|---------|---------|----------|
| 7548.1  | 35150.8 | 44803.1 | 54002.1 | 65086.2 | 81099.5 | 95443.4  |
| 7742.6  | 35165.9 | 44803.1 | 54015.6 | 65196.8 | 81205.5 | 95517.2  |
| 7745.7  | 35174.6 | 44906.9 | 54050.1 | 65263.8 | 81217.9 | 95582.1  |
| 28478.6 | 35193.1 | 44982.6 | 54070.2 | 65935.9 | 81231.3 | 96078.6  |
| 30539.7 | 35713.6 | 45021.1 | 54072.7 | 66059.5 | 81280.8 | 96078.6  |
| 30753.7 | 36108.4 | 45025.0 | 54082.3 | 66119.1 | 81923.7 | 96204.5  |
| 23974.6 | 36112.4 | 45028.5 | 54347.3 | 66552.7 | 81923.8 | 96205.1  |
| 24284.8 | 36189.2 | 45059.6 | 54347.7 | 66553.4 | 81941.9 | 96231.0  |
| 24503.4 | 36207.1 | 45086.7 | 54397.5 | 66575.7 | 81942.4 | 96236.4  |
| 24571.4 | 37677.9 | 45109.7 | 54404.7 | 66576.1 | 82196.3 | 96874.3  |
| 24606.4 | 37677.9 | 45120.8 | 54470.7 | 66620.4 | 82196.3 | 97012.7  |
| 24627.5 | 37735.2 | 45150.3 | 54477.9 | 66620.4 | 83018.5 | 97044.3  |
| 24648.9 | 37735.9 | 45236.5 | 54488.4 | 66734.8 | 83018.5 | 97054.1  |
| 24695.2 | 37993.0 | 45262.6 | 54488.5 | 66769.7 | 83587.7 | 97101.6  |
| 24868.5 | 37994.5 | 45268.5 | 54488.5 | 66795.6 | 83587.7 | 98141.8  |
| 24985.2 | 38002.6 | 45414.3 | 54488.7 | 66795.6 | 85397.3 | 98147.6  |
| 24991.9 | 38090.0 | 45425.9 | 54506.5 | 66800.2 | 85398.1 | 99000.3  |
| 25146.1 | 38092.7 | 45431.1 | 54552.0 | 66931.7 | 85522.5 | 99001.2  |
| 25177.5 | 38157.7 | 45660.2 | 54552.5 | 66931.7 | 85585.0 | 100615.1 |
| 25304.0 | 38218.4 | 45667.7 | 54570.9 | 66948.0 | 85696.4 | 100617.2 |
| 25314.3 | 38275.6 | 45849.0 | 54582.7 | 66955.1 | 85887.5 | 101517.5 |
| 25366.8 | 38275.7 | 45849.0 | 54635.0 | 66962.3 | 85893.2 | 101557.2 |
| 25422.1 | 38432.8 | 45863.9 | 54637.7 | 67093.3 | 87625.6 | 101720.3 |
| 25425.3 | 38434.6 | 45864.2 | 54677.1 | 67263.3 | 87694.7 | 101804.8 |
| 25442.5 | 38437.0 | 45954.2 | 54678.2 | 67474.6 | 87694.8 | 101975.9 |
| 25446.7 | 38437.3 | 45982.6 | 54701.5 | 67566.8 | 87835.4 | 103908.3 |
| 25467.5 | 38453.8 | 45982.6 | 54710.5 | 67673.5 | 88195.6 | 105305.8 |
| 25568.7 | 38458.9 | 46154.9 | 54729.7 | 68149.8 | 88237.9 | 105520.7 |
| 25577.9 | 38458.9 | 46154.9 | 54744.2 | 68181.4 | 88245.2 | 110446.2 |
| 25660.5 | 38461.8 | 46211.3 | 54770.1 | 70268.1 | 88365.4 | 110475.8 |
| 25722.1 | 38604.6 | 46211.6 | 55006.3 | 70402.3 | 88470.5 | 110586.3 |
| 25739.0 | 38705.8 | 49420.9 | 55041.3 | 70420.6 | 88584.4 | 110723.7 |
| 25759.6 | 38780.2 | 50071.3 | 55046.9 | 70452.2 | 88595.3 | 110790.2 |
| 25878.0 | 38802.1 | 50080.6 | 55052.9 | 70461.7 | 88598.1 | 111066.7 |
| 25885.3 | 38809.5 | 50091.7 | 55056.7 | 70464.2 | 88614.3 | 111091.4 |
| 26025.6 | 38818.4 | 50123.9 | 55108.3 | 70468.7 | 88713.0 | 111101.2 |
| 26251.9 | 38836.2 | 50131.1 | 55137.2 | 70494.9 | 88756.5 | 111116.3 |
| 26327.6 | 38916.6 | 50137.3 | 55204.4 | 70628.2 | 88792.0 | 111471.7 |
| 26404.0 | 38923.8 | 50199.5 | 55499.3 | 70628.3 | 88890.6 | 111472.5 |
| 26465.5 | 38939.8 | 50215.5 | 55499.4 | 71033.4 | 88919.2 | 111853.7 |
| 26469.8 | 38946.7 | 50249.9 | 55655.2 | 71033.5 | 89111.0 | 111853.7 |
| 26667.3 | 38969.4 | 50262.1 | 55659.7 | 71036.1 | 89146.6 | 112340.0 |
| 27034.0 | 39608.3 | 50278.5 | 55662.9 | 71043.5 | 89364.2 | 112340.1 |
| 27085.3 | 39678.1 | 50358.6 | 55808.6 | 71329.5 | 89414.5 | 112505.8 |
| 27311.4 | 39986.2 | 50367.0 | 55809.3 | 71342.1 | 89440.1 | 112616.2 |
| 27369.4 | 39997.1 | 50382.4 | 55850.1 | 72176.7 | 89448.0 | 112884.2 |
| 27525.5 | 40454.1 | 50385.8 | 56034.7 | 72306.1 | 89453.3 | 113451.1 |
| 27608.1 | 40558.4 | 50400.1 | 56059.9 | 72374.3 | 89552.5 | 113451.1 |
| 27622.1 | 40580.0 | 50429.8 | 56096.4 | 74859.2 | 89574.6 | 118598.6 |
| 27973.3 | 40688.3 | 50474.1 | 56112.3 | 75136.5 | 89728.5 | 119066.0 |
| 27973.3 | 40791.3 | 50478.3 | 56154.8 | 75136.5 | 89753.6 | 119232.0 |
| 28714.9 | 40906.3 | 50529.7 | 56170.5 | 75402.7 | 89761.2 | 119741.2 |
| 28714.9 | 41302.7 | 50538.5 | 56266.8 | 75544.9 | 89817.1 | 119803.0 |
| 29670.3 | 41384.7 | 50583.1 | 56303.4 | 75568.5 | 89831.6 | 121284.4 |
| 29670.3 | 41561.8 | 50583.5 | 56303.5 | 75569.4 | 89844.4 | 121287.8 |
| 30031.8 | 41891.2 | 50790.7 | 56664.8 | 75716.0 | 89949.5 | 127085.4 |
| 30034.0 | 41891.8 | 50791.8 | 56674.3 | 75733.4 | 90040.8 | 127086.7 |
| 30035.9 | 42248.4 | 51190.5 | 56891.3 | 75795.7 | 90150.6 | 127552.4 |
| 30049.6 | 42462.3 | 51190.5 | 57011.0 | 75799.9 | 90223.8 | 127552.7 |
| 30117.7 | 42597.8 | 51366.7 | 57271.1 | 75830.0 | 90262.2 | 128608.7 |
| 30126.9 | 42923.6 | 51459.7 | 57271.4 | 76139.7 | 90289.3 | 128621.1 |
| 30294.3 | 43009.3 | 51485.7 | 57595.5 | 76169.7 | 90301.0 | 128901.0 |
| 30295.4 | 43021.9 | 51657.9 | 57615.6 | 76204.6 | 90320.3 | 128944.6 |
| 30310.8 | 43044.7 | 51657.9 | 57641.4 | 76319.8 | 90332.5 | 128987.3 |
| 30310.8 | 43089.6 | 51671.5 | 57648.4 | 76399.5 | 90377.5 | 129043.8 |
| 30448.4 | 43089.7 | 51692.2 | 57648.8 | 76546.1 | 90975.6 | 129095.9 |
| 30481.8 | 43126.2 | 51807.4 | 57680.9 | 76580.7 | 90975.7 | 130743.7 |
| 30525.5 | 43232.9 | 51807.8 | 57682.6 | 76581.2 | 91057.3 | 132871.4 |
| 30546.1 | 43282.4 | 51834.5 | 57886.1 | 76589.6 | 91089.9 | 132871.6 |
| 30596.5 | 43328.5 | 51838.0 | 57927.7 | 76768.6 | 91186.7 | 133825.7 |
| 30619.4 | 43354.7 | 51851.1 | 58137.6 | 77017.3 | 91194.0 | 133832.0 |
| 30736.1 | 43457.3 | 51851.4 | 58144.8 | 77074.4 | 91432.6 | 134263.5 |
| 30817.0 | 43458.6 | 51894.5 | 58196.8 | 77100.2 | 91435.4 | 134287.1 |
| 32185.0 | 43460.8 | 51894.7 | 58216.8 | 77248.7 | 91896.4 | 134335.8 |
| 32233.3 | 43484.9 | 51943.6 | 58300.8 | 77266.9 | 91896.6 | 134398.5 |
| 32237.4 | 43503.0 | 51943.8 | 58362.8 | 77491.5 | 92714.5 | 134402.9 |
|         | 43530.6 | 52032.9 | 58387.3 | 77491.7 | 92714.5 | 134433.8 |

## Supporting Information

|         |         |         |         |         |         |          |
|---------|---------|---------|---------|---------|---------|----------|
| 32352.5 | 43531.0 | 52151.8 | 58647.5 | 77729.3 | 93132.2 | 134437.4 |
| 32397.3 | 43535.2 | 52151.9 | 58649.9 | 77729.5 | 93132.2 | 156513.3 |
| 32397.3 | 43546.5 | 52453.7 | 59065.6 | 77864.6 | 93380.9 | 156590.3 |
| 32410.1 | 43723.3 | 52453.7 | 59065.8 | 77864.6 | 93380.9 | 156983.9 |
| 32535.4 | 43741.5 | 52457.2 | 59569.3 | 78030.6 | 93539.6 | 157663.4 |
| 32537.9 | 43743.9 | 52463.8 | 59589.8 | 78030.6 | 93539.6 | 157782.2 |
| 32551.2 | 43778.5 | 52497.9 | 59607.9 | 78489.2 | 93721.8 | 160261.9 |
| 32551.6 | 43784.6 | 52516.2 | 59608.0 | 78489.2 | 93721.9 | 160320.1 |
| 32617.7 | 43809.6 | 52673.8 | 59610.3 | 79238.1 | 94114.3 | 160396.5 |
| 32620.4 | 43810.2 | 52687.2 | 59623.9 | 79309.2 | 94114.5 | 160706.7 |
| 32658.3 | 43841.8 | 52725.7 | 59706.9 | 79532.3 | 94323.4 | 160931.1 |
| 32658.9 | 43853.6 | 52725.7 | 59736.0 | 79566.7 | 94343.4 | 162989.2 |
| 32679.8 | 43874.3 | 52821.8 | 59805.7 | 79838.8 | 94369.5 | 163237.2 |
| 32680.4 | 43969.1 | 52843.2 | 59805.7 | 79859.2 | 94406.4 |          |

**Table S14:** CASSCF computed the spin-orbit states for  $[\text{Dy}(\text{C}_4(\text{SiH}_3)_4)_2]^-$  complex. All the values are reported here in  $\text{cm}^{-1}$ .

| 1                 |         |         |         |         |         |         |          |
|-------------------|---------|---------|---------|---------|---------|---------|----------|
| Spin orbit states |         |         |         |         |         |         |          |
| CASSCF            |         |         |         |         |         |         |          |
| 0.0               | 31177.8 | 40563.9 | 50701.8 | 61324.7 | 70842.5 | 90105.5 | 105583.3 |
| 597.8             | 31224.2 | 40817.3 | 50726.2 | 61366.2 | 70932.4 | 90280.5 | 105849.5 |
| 933.6             | 31829.9 | 40847.8 | 50763.3 | 61411.0 | 71001.2 | 90285.2 | 105867.2 |
| 1153.6            | 32142.3 | 40858.5 | 50777.6 | 61418.9 | 71187.9 | 90379.4 | 106096.5 |
| 1364.3            | 32286.3 | 40885.3 | 50784.3 | 61563.8 | 71828.9 | 90425.1 | 106325.6 |
| 1576.1            | 32339.2 | 40900.3 | 50801.3 | 61614.9 | 72254.5 | 90445.5 | 106334.6 |
| 1768.8            | 32349.4 | 40997.3 | 50852.0 | 61645.4 | 72333.4 | 90708.4 | 106397.9 |
| 1904.8            | 32358.1 | 41019.9 | 50879.0 | 61707.9 | 72383.9 | 90765.0 | 106430.3 |
| 3446.4            | 32375.9 | 41082.0 | 51087.5 | 61806.4 | 72465.3 | 90797.3 | 106661.0 |
| 3584.2            | 32395.9 | 41102.0 | 51112.3 | 61813.1 | 72717.5 | 90987.0 | 106716.3 |
| 4009.5            | 32415.3 | 41127.8 | 51194.5 | 61860.8 | 73092.4 | 90995.4 | 106791.5 |
| 4351.5            | 32469.5 | 41144.4 | 51215.0 | 61881.4 | 73339.0 | 91126.2 | 106924.1 |
| 4523.9            | 32525.3 | 41182.6 | 51276.1 | 61901.5 | 73547.9 | 91203.8 | 107052.6 |
| 4617.4            | 32605.1 | 41203.3 | 51300.4 | 61941.3 | 74557.1 | 91218.4 | 107746.8 |
| 4712.1            | 32617.6 | 41222.5 | 51334.7 | 61970.1 | 74582.5 | 91220.7 | 107858.7 |
| 5839.7            | 32621.5 | 41298.5 | 51339.6 | 61979.0 | 74687.9 | 91243.5 | 108075.4 |
| 5945.1            | 32638.0 | 41464.9 | 51421.8 | 62015.7 | 74919.3 | 91336.5 | 108198.6 |
| 6282.1            | 32827.8 | 41654.1 | 51531.4 | 62114.7 | 74992.4 | 91359.7 | 108227.0 |
| 6616.1            | 32861.9 | 42361.6 | 51535.4 | 62232.7 | 75127.9 | 91527.4 | 108283.0 |
| 6738.2            | 32939.4 | 42471.5 | 51552.5 | 62237.0 | 75132.9 | 91550.5 | 108290.9 |
| 6821.0            | 33239.6 | 42570.6 | 51566.1 | 62251.8 | 75194.6 | 91573.8 | 109293.3 |
| 7693.9            | 33279.2 | 42579.6 | 51652.1 | 62304.5 | 75224.1 | 91657.4 | 109541.0 |
| 7796.4            | 33381.2 | 42766.8 | 51676.9 | 62337.5 | 75246.9 | 91881.6 | 109883.2 |
| 8066.8            | 33460.2 | 43054.5 | 51746.6 | 62365.1 | 75263.4 | 91953.6 | 109983.0 |
| 8384.3            | 33609.9 | 43119.5 | 51772.7 | 62573.5 | 75351.0 | 92016.1 | 110043.2 |
| 8471.0            | 34088.4 | 43216.0 | 51862.7 | 62628.4 | 75371.7 | 92110.2 | 110156.7 |
| 9087.1            | 34113.3 | 43286.1 | 52032.2 | 62630.0 | 75405.0 | 92146.3 | 110218.4 |
| 9190.3            | 34151.6 | 43312.4 | 52070.9 | 62657.7 | 75455.2 | 92266.6 | 110286.8 |
| 9681.3            | 34190.3 | 43399.5 | 52178.6 | 62693.3 | 75503.9 | 92282.9 | 110413.9 |
| 9768.9            | 34206.7 | 43431.4 | 52292.9 | 62763.4 | 75732.1 | 92377.4 | 110455.6 |
| 10069.1           | 34228.8 | 43471.3 | 52306.8 | 62775.7 | 75738.7 | 92493.7 | 110501.9 |
| 10431.8           | 34251.3 | 43477.0 | 52326.3 | 62779.1 | 75759.9 | 92573.4 | 110700.4 |
| 10472.5           | 34312.6 | 43512.6 | 52354.9 | 62832.3 | 75868.5 | 92830.2 | 110833.2 |
| 10524.6           | 34382.2 | 43516.8 | 52436.0 | 62843.5 | 75891.2 | 93047.5 | 111073.7 |
| 10572.5           | 34422.5 | 43565.9 | 52440.2 | 62861.3 | 75966.8 | 93309.9 | 111375.6 |
| 10644.2           | 34464.4 | 43599.4 | 52512.7 | 63005.1 | 76008.5 | 93400.1 | 111487.1 |
| 10666.8           | 34524.1 | 43615.9 | 52585.5 | 63079.3 | 76058.9 | 94031.2 | 111611.7 |
| 10851.8           | 34540.4 | 43628.8 | 52607.2 | 63235.8 | 76135.8 | 94201.8 | 112217.9 |
| 10936.2           | 34636.7 | 43710.1 | 52773.9 | 63292.5 | 76222.3 | 94573.7 | 113251.3 |
| 11812.3           | 34641.4 | 43721.8 | 53026.1 | 63361.7 | 76400.4 | 95210.0 | 113307.6 |
| 11907.9           | 34682.1 | 44784.2 | 53028.8 | 63470.8 | 77621.1 | 95239.3 | 113339.7 |
| 11934.4           | 34713.9 | 44863.2 | 53254.6 | 63525.2 | 77646.5 | 95363.1 | 113426.6 |
| 11971.3           | 34744.9 | 44988.4 | 53357.1 | 63639.2 | 78005.3 | 95520.3 | 113689.1 |
| 12080.9           | 34758.8 | 44993.2 | 53373.7 | 63767.6 | 78730.6 | 95740.5 | 113909.8 |
| 13528.1           | 34832.5 | 45014.2 | 53749.2 | 63787.4 | 79219.2 | 95826.4 | 114251.5 |
| 13594.5           | 35011.5 | 45089.6 | 53928.2 | 63813.0 | 80037.3 | 96347.2 | 114520.9 |
| 13640.7           | 35156.0 | 45183.9 | 54175.4 | 63831.1 | 80612.8 | 96952.8 | 114587.0 |
| 13675.0           | 35272.4 | 45260.7 | 54577.3 | 63935.0 | 81122.6 | 96997.5 | 114701.2 |
| 14856.0           | 35765.2 | 45443.1 | 54693.6 | 63973.2 | 81273.2 | 97096.0 | 114931.1 |
| 14880.3           | 35828.1 | 45448.5 | 54813.0 | 64091.1 | 81414.6 | 97134.1 | 115117.6 |

## Supporting Information

|         |         |         |         |         |         |          |          |
|---------|---------|---------|---------|---------|---------|----------|----------|
| 14919.3 | 35999.3 | 45587.7 | 54835.4 | 64105.1 | 81474.3 | 97614.3  | 115236.1 |
| 15683.5 | 36007.3 | 45593.9 | 54924.8 | 64140.1 | 81479.4 | 97629.6  | 115851.6 |
| 15698.3 | 36065.4 | 45617.8 | 54942.4 | 64151.1 | 81520.0 | 97687.5  | 116076.6 |
| 16213.9 | 36073.5 | 45651.3 | 54965.0 | 64180.8 | 81587.2 | 97763.7  | 116483.4 |
| 24485.6 | 36188.5 | 45713.0 | 54999.2 | 64271.8 | 81624.8 | 97946.5  | 116496.7 |
| 24583.6 | 36237.6 | 45719.3 | 55035.4 | 64279.4 | 81823.2 | 97981.7  | 116778.4 |
| 24643.9 | 36241.4 | 45817.9 | 55048.9 | 64296.1 | 81834.3 | 98520.3  | 117832.4 |
| 24718.6 | 36246.1 | 45819.2 | 55061.4 | 64313.3 | 81873.0 | 98688.7  | 117874.7 |
| 24826.3 | 36329.3 | 45845.2 | 55073.1 | 64413.4 | 81919.0 | 98709.5  | 118113.7 |
| 24976.6 | 36423.9 | 45930.1 | 55180.6 | 64581.7 | 81933.9 | 98887.9  | 118246.3 |
| 24980.9 | 36528.5 | 45988.8 | 55316.8 | 64625.9 | 81946.4 | 99459.0  | 118584.9 |
| 25214.8 | 36690.9 | 46044.3 | 55328.8 | 64637.4 | 82100.8 | 99961.2  | 120522.7 |
| 25628.0 | 36830.6 | 46127.0 | 55346.8 | 64712.3 | 82134.0 | 100024.3 | 121766.8 |
| 25707.3 | 36845.1 | 46326.3 | 55608.8 | 64727.8 | 82178.3 | 100060.5 | 125050.2 |
| 25817.3 | 37175.2 | 46673.0 | 55764.2 | 65154.3 | 82206.0 | 100144.0 | 125172.9 |
| 25850.3 | 37237.6 | 46698.3 | 55785.4 | 65448.3 | 82257.1 | 100332.4 | 125350.6 |
| 25895.5 | 37338.7 | 46780.6 | 55843.2 | 65493.3 | 82271.4 | 100624.2 | 125605.4 |
| 26783.1 | 37459.4 | 46790.6 | 55889.2 | 65598.2 | 82295.1 | 100660.8 | 125883.4 |
| 27167.7 | 37557.4 | 46858.4 | 55941.0 | 65782.4 | 82315.6 | 100765.8 | 125904.0 |
| 27229.3 | 37561.3 | 46864.7 | 55964.8 | 65809.0 | 82493.9 | 100781.8 | 126077.1 |
| 27264.7 | 37571.7 | 46960.5 | 55987.4 | 65840.6 | 82512.5 | 100796.1 | 126279.9 |
| 27308.3 | 37584.1 | 47010.7 | 56108.4 | 65904.0 | 82547.3 | 100809.4 | 126351.7 |
| 27351.6 | 37627.7 | 47029.6 | 56153.5 | 66021.4 | 82560.0 | 101238.4 | 126714.5 |
| 27533.5 | 37705.7 | 47045.2 | 56199.8 | 66038.7 | 82656.8 | 101439.8 | 126989.2 |
| 27556.3 | 37810.2 | 47061.6 | 56239.4 | 66192.0 | 82816.7 | 101660.0 | 127115.0 |
| 27602.2 | 37875.4 | 47075.2 | 56283.2 | 66301.7 | 83178.5 | 101731.5 | 127563.4 |
| 27608.6 | 37890.3 | 47121.3 | 56404.1 | 66392.1 | 83554.5 | 101844.6 | 127975.0 |
| 27622.2 | 38023.1 | 47145.9 | 56441.5 | 66483.4 | 83691.3 | 101850.3 | 128166.3 |
| 27646.6 | 38026.5 | 47274.1 | 56624.0 | 66654.5 | 84461.5 | 101882.7 | 129025.6 |
| 27674.3 | 38136.6 | 47293.9 | 56816.9 | 66735.7 | 84578.6 | 101904.2 | 129147.5 |
| 27679.4 | 38140.9 | 47304.3 | 56905.8 | 66748.2 | 84744.5 | 101928.5 | 129325.4 |
| 27725.7 | 38180.7 | 47317.5 | 57230.6 | 66782.3 | 84749.3 | 101993.9 | 129391.8 |
| 27971.0 | 38305.0 | 47509.0 | 57600.0 | 67124.4 | 84794.0 | 102006.8 | 130809.8 |
| 28096.9 | 38314.7 | 47606.3 | 58010.8 | 67146.6 | 84838.3 | 102120.4 | 136281.6 |
| 28234.5 | 38340.9 | 47786.9 | 58045.0 | 67193.6 | 84891.7 | 102176.2 | 136839.6 |
| 28464.8 | 38362.3 | 47875.3 | 58081.2 | 67256.8 | 84946.7 | 102391.7 | 138044.1 |
| 28563.5 | 38392.9 | 47976.3 | 58122.4 | 67329.7 | 84977.5 | 102522.4 | 139150.5 |
| 28590.1 | 38425.3 | 47995.3 | 58162.6 | 67342.3 | 85039.4 | 102746.7 | 139581.5 |
| 28689.2 | 38529.1 | 48079.6 | 58215.6 | 67398.0 | 85178.5 | 102818.3 | 140390.3 |
| 28732.3 | 38563.7 | 48116.9 | 58257.7 | 67442.9 | 85238.8 | 103171.8 | 141458.6 |
| 28751.7 | 38683.0 | 48173.6 | 58543.4 | 67474.5 | 85337.5 | 103281.6 | 143699.3 |
| 28768.8 | 38694.7 | 48174.2 | 59171.3 | 67547.7 | 85378.0 | 103392.1 | 144026.2 |
| 28825.9 | 38855.8 | 48300.8 | 59190.9 | 67633.9 | 85402.1 | 103395.2 | 144471.9 |
| 28839.8 | 38984.6 | 48323.9 | 59242.1 | 67649.3 | 85465.1 | 103405.8 | 144959.7 |
| 28857.9 | 39138.0 | 48503.6 | 59300.0 | 67750.0 | 85508.0 | 103432.1 | 145150.4 |
| 28931.9 | 39146.4 | 48750.5 | 59433.5 | 67751.2 | 85552.6 | 103465.4 | 146447.2 |
| 28960.0 | 39162.7 | 49218.8 | 59509.1 | 67784.1 | 85579.3 | 103667.1 | 147139.2 |
| 28997.8 | 39181.9 | 49267.0 | 59554.7 | 68011.2 | 85604.8 | 103708.8 | 147278.2 |
| 29061.4 | 39190.5 | 49276.5 | 59593.1 | 68022.3 | 85626.7 | 103771.2 | 147778.2 |
| 29077.0 | 39343.9 | 49312.3 | 59731.2 | 68053.6 | 85638.6 | 103822.0 | 147931.4 |
| 29130.9 | 39419.9 | 49353.9 | 59800.3 | 68087.5 | 85676.2 | 103841.3 | 148061.0 |
| 29154.8 | 39514.8 | 49391.3 | 59811.2 | 68108.7 | 85692.5 | 103859.9 | 150033.4 |
| 29203.3 | 39558.7 | 49486.8 | 60065.7 | 68127.5 | 85742.8 | 104069.6 | 150331.4 |
| 29288.9 | 39560.6 | 49496.9 | 60123.7 | 68389.4 | 85777.2 | 104122.7 | 150718.8 |
| 29304.0 | 39566.4 | 49620.1 | 60219.3 | 68398.9 | 85780.0 | 104243.2 | 151102.2 |
| 29443.4 | 39572.8 | 49709.0 | 60273.5 | 68425.0 | 85862.6 | 104272.9 | 151169.4 |
| 29450.5 | 39582.3 | 49722.5 | 60303.5 | 68452.9 | 85930.8 | 104308.9 | 151214.3 |
| 29534.9 | 39596.7 | 49775.5 | 60356.0 | 68576.6 | 85946.6 | 104457.1 | 151227.3 |
| 29577.5 | 39615.7 | 49808.5 | 60501.5 | 68746.0 | 86021.3 | 104529.7 | 153319.6 |
| 29603.0 | 39679.6 | 49828.0 | 60572.8 | 68810.2 | 86207.8 | 104561.6 | 154219.0 |
| 29631.8 | 39692.1 | 49850.5 | 60630.3 | 69117.4 | 86239.6 | 104591.6 | 154716.7 |
| 29686.9 | 39767.2 | 49996.6 | 60636.0 | 69307.0 | 86395.0 | 104776.8 | 154844.1 |
| 29702.0 | 39808.4 | 50052.5 | 60691.7 | 69469.4 | 86553.1 | 104801.3 | 154883.4 |
| 29718.8 | 39850.2 | 50145.7 | 60765.9 | 69485.8 | 86670.5 | 104814.5 | 177155.9 |
| 30254.0 | 39934.9 | 50275.8 | 60778.2 | 69549.8 | 86811.8 | 104861.5 | 177967.1 |
| 30428.8 | 40020.1 | 50366.1 | 60789.6 | 69833.4 | 86814.1 | 104873.2 | 179590.1 |
| 30675.0 | 40104.0 | 50375.4 | 60824.4 | 69906.4 | 86927.4 | 105059.0 | 181180.2 |
| 30782.3 | 40162.2 | 50395.1 | 60912.9 | 69983.8 | 86965.9 | 105135.1 | 182355.9 |
| 30810.9 | 40167.8 | 50477.7 | 60935.3 | 70000.7 | 87076.0 | 105274.5 | 182789.2 |
| 30846.9 | 40221.8 | 50487.8 | 60944.5 | 70148.6 | 87197.7 | 105304.3 | 182920.0 |
| 30882.2 | 40235.0 | 50526.1 | 60969.5 | 70222.7 | 88009.7 | 105315.1 | 182949.5 |
| 30935.9 | 40348.1 | 50545.0 | 61002.3 | 70277.1 | 89396.1 | 105334.5 | 184002.7 |
| 31055.2 | 40393.2 | 50554.7 | 61104.9 | 70314.4 | 89539.8 | 105367.1 | 185585.3 |
| 31083.3 | 40421.7 | 50582.7 | 61136.6 | 70570.6 | 89549.4 | 105381.7 | 186068.3 |
| 31112.6 | 40534.6 | 50635.0 | 61216.4 | 70579.5 | 89783.2 | 105434.6 | 187620.7 |
| 31176.7 |         |         |         |         |         |          |          |



**Table S15:** NEVPT2 computed the spin-orbit states for  $[\text{Dy}(\text{C}_4(\text{SiH}_3)_4)_2]^-$  complex. All the values are reported here in  $\text{cm}^{-1}$ .

| 1                 |         |         |         |         |         |         |          |
|-------------------|---------|---------|---------|---------|---------|---------|----------|
| Spin orbit states |         |         |         |         |         |         |          |
| NEVPT2            |         |         |         |         |         |         |          |
| 0.0               | 31450.3 | 40097.1 | 49671.8 | 58945.6 | 67120.6 | 83611.5 | 98533.0  |
| 662.0             | 31461.5 | 40130.0 | 49979.9 | 58971.3 | 67188.0 | 83647.1 | 98628.6  |
| 958.0             | 31602.4 | 40152.5 | 50195.0 | 59057.2 | 67264.0 | 83789.7 | 98830.8  |
| 1142.2            | 31673.1 | 40222.2 | 50290.7 | 59208.3 | 67453.8 | 83849.7 | 98864.4  |
| 1360.9            | 31763.3 | 40229.7 | 50317.5 | 59288.5 | 67518.5 | 83862.9 | 98929.1  |
| 1609.7            | 31797.8 | 40270.8 | 50447.0 | 59301.8 | 67797.1 | 83932.8 | 99043.6  |
| 1867.5            | 31893.2 | 40282.7 | 50503.9 | 59333.6 | 67869.3 | 84009.0 | 99113.2  |
| 2027.4            | 31950.6 | 40405.2 | 50635.4 | 59351.4 | 68019.4 | 84094.4 | 99123.5  |
| 3518.4            | 32048.9 | 40410.2 | 50660.8 | 59380.6 | 68407.8 | 84108.4 | 99268.2  |
| 3543.6            | 32080.8 | 40416.1 | 50719.9 | 59426.1 | 68505.6 | 84113.8 | 99276.2  |
| 4045.9            | 32089.7 | 40535.1 | 50771.1 | 59501.3 | 68595.8 | 84149.8 | 99317.3  |
| 4427.6            | 32188.0 | 40593.9 | 50815.8 | 59605.9 | 68895.1 | 84204.6 | 99584.8  |
| 4588.3            | 32231.5 | 40598.1 | 50868.9 | 59609.7 | 68969.3 | 84207.1 | 99757.5  |
| 4665.7            | 32289.6 | 40622.8 | 50931.6 | 59687.9 | 69006.2 | 84393.6 | 99935.6  |
| 4785.5            | 32297.4 | 40638.6 | 50939.6 | 59780.7 | 69287.9 | 84456.9 | 100255.0 |
| 5866.7            | 32319.3 | 40688.0 | 50996.6 | 59871.6 | 69329.7 | 84506.6 | 100384.0 |
| 5907.7            | 32368.1 | 40719.7 | 51016.8 | 59879.9 | 69356.3 | 84610.4 | 100394.7 |
| 6294.4            | 32423.3 | 40815.1 | 51436.8 | 59889.8 | 69631.9 | 84693.8 | 100620.1 |
| 6665.2            | 32569.2 | 40819.7 | 51970.8 | 59932.0 | 69817.5 | 84741.4 | 100641.7 |
| 6758.0            | 32625.7 | 40975.4 | 52308.3 | 59951.9 | 70040.1 | 84802.9 | 100694.2 |
| 6845.9            | 32792.1 | 41140.9 | 52326.6 | 60009.6 | 70690.0 | 84838.3 | 100733.1 |
| 7686.2            | 32827.2 | 41180.3 | 52392.0 | 60028.7 | 70957.5 | 84858.4 | 100778.4 |
| 7787.2            | 32940.9 | 41226.7 | 52436.1 | 60057.1 | 71198.9 | 84894.7 | 100804.0 |
| 8054.0            | 33061.6 | 41299.7 | 52504.7 | 60074.5 | 71386.4 | 85044.5 | 100845.0 |
| 8363.1            | 33201.7 | 41303.3 | 52584.7 | 60104.7 | 71410.4 | 85074.4 | 100877.8 |
| 8507.1            | 33219.4 | 41317.3 | 52621.7 | 60107.1 | 71436.7 | 85355.6 | 101214.2 |
| 9031.6            | 33273.5 | 41356.2 | 52673.7 | 60114.5 | 71868.3 | 85392.4 | 101255.6 |
| 9183.5            | 33298.8 | 41485.1 | 52697.8 | 60290.2 | 71947.6 | 85464.3 | 101340.5 |
| 9215.9            | 33329.5 | 41499.0 | 52735.6 | 60354.3 | 71953.7 | 85545.4 | 101363.3 |
| 9283.3            | 33396.1 | 41539.1 | 52751.8 | 60372.2 | 72008.9 | 85673.8 | 101427.9 |
| 9316.6            | 33558.3 | 41592.1 | 52803.5 | 60380.6 | 72087.9 | 85816.8 | 101632.5 |
| 9405.6            | 33599.5 | 41614.5 | 52942.2 | 60407.4 | 72145.1 | 85977.4 | 101662.1 |
| 9499.6            | 33739.7 | 41705.9 | 52952.8 | 60413.1 | 72193.7 | 86036.3 | 101702.5 |
| 9680.6            | 33823.5 | 42044.9 | 52956.1 | 60450.9 | 72251.4 | 86190.4 | 101746.4 |
| 9736.5            | 33868.4 | 42343.5 | 52971.7 | 60469.9 | 72300.3 | 86233.4 | 101824.8 |
| 9793.9            | 33935.3 | 42541.9 | 52979.3 | 60510.9 | 72359.2 | 86729.9 | 101968.1 |
| 10060.2           | 34071.1 | 42792.8 | 53001.0 | 60557.7 | 72580.0 | 86767.0 | 102345.6 |
| 10547.7           | 34204.0 | 43074.7 | 53071.3 | 60619.2 | 72633.4 | 86937.1 | 103034.3 |
| 10659.0           | 34234.1 | 44040.6 | 53086.9 | 60636.7 | 72661.7 | 87360.2 | 103663.5 |
| 10804.1           | 34388.4 | 44047.2 | 53214.4 | 60661.0 | 72670.8 | 88087.0 | 103724.6 |
| 10877.8           | 34553.7 | 44059.1 | 53274.2 | 60678.0 | 72724.0 | 88586.4 | 103752.1 |
| 10898.0           | 34599.2 | 44162.2 | 53371.4 | 60731.8 | 72814.2 | 88690.4 | 103911.3 |
| 10968.7           | 34626.9 | 44269.5 | 53526.7 | 60830.2 | 72869.5 | 88804.6 | 104753.1 |
| 10993.5           | 34702.6 | 44317.6 | 53541.9 | 61011.1 | 72879.9 | 88916.7 | 104850.4 |
| 12369.4           | 34736.3 | 44359.8 | 53597.0 | 61050.9 | 72891.3 | 89191.3 | 104986.4 |
| 12473.5           | 34748.0 | 44499.2 | 53612.6 | 61068.2 | 73790.1 | 89215.3 | 105186.2 |
| 12503.8           | 34780.9 | 44511.4 | 53645.1 | 61106.6 | 74051.9 | 89546.1 | 105247.5 |
| 12579.6           | 34850.8 | 44541.7 | 53660.0 | 61148.6 | 74929.9 | 89692.4 | 105508.8 |
| 13668.7           | 34891.3 | 44559.3 | 53686.4 | 61158.5 | 75091.2 | 89785.7 | 105705.6 |
| 13706.9           | 34928.0 | 44637.9 | 53705.0 | 61195.0 | 75142.0 | 89953.4 | 105823.6 |
| 13769.4           | 35108.5 | 44705.3 | 53889.9 | 61241.2 | 75171.2 | 90566.2 | 106189.3 |
| 14463.1           | 35176.6 | 44768.7 | 53999.3 | 61289.7 | 75287.5 | 90639.7 | 106331.6 |
| 14495.5           | 35203.1 | 44852.3 | 54014.1 | 61385.8 | 75318.1 | 90664.9 | 106562.6 |
| 14998.9           | 35266.0 | 45105.0 | 54057.0 | 61409.6 | 75330.5 | 90789.1 | 106914.4 |
| 23814.7           | 35302.1 | 45158.9 | 54424.1 | 61438.8 | 75350.2 | 90929.8 | 107114.7 |
| 23862.8           | 35386.7 | 45197.0 | 54634.0 | 61461.3 | 75443.0 | 91143.4 | 107415.5 |
| 24123.6           | 35497.2 | 45512.1 | 54734.4 | 61625.6 | 75448.2 | 91156.5 | 108301.3 |
| 24271.3           | 35667.7 | 45724.5 | 54817.9 | 61675.4 | 75457.6 | 91215.5 | 108501.2 |
| 24355.4           | 35917.5 | 45759.5 | 54852.8 | 61696.6 | 75534.8 | 91628.9 | 108636.4 |
| 24837.1           | 35982.1 | 45804.9 | 54924.5 | 61725.0 | 75578.9 | 92178.8 | 108685.4 |
| 24846.6           | 36068.5 | 45936.9 | 54936.8 | 61764.8 | 75633.9 | 92373.5 | 108876.9 |
| 24947.3           | 36074.6 | 46271.2 | 54966.5 | 62213.9 | 75793.7 | 92584.2 | 110417.0 |
| 25583.1           | 36093.0 | 46381.5 | 55014.9 | 62262.9 | 75915.1 | 92836.6 | 111619.2 |
| 25617.6           | 36269.0 | 46522.3 | 55132.4 | 62310.2 | 75974.8 | 93059.7 | 116016.4 |
| 25699.8           | 36327.3 | 46580.0 | 55152.2 | 62383.2 | 75981.6 | 93066.6 | 116154.2 |
| 25770.7           | 36400.0 | 46584.7 | 55275.6 | 62454.3 | 75983.9 | 93185.2 | 116363.2 |
| 25791.0           | 36450.5 | 46647.7 | 55346.1 | 62478.1 | 76008.0 | 93210.4 | 116649.4 |
| 25865.4           | 36481.5 | 46651.7 | 55480.0 | 62500.6 | 76010.0 | 93264.1 | 116813.2 |
| 25967.0           | 36508.9 | 46686.3 | 55527.4 | 62544.5 | 76048.2 | 93293.0 | 116830.7 |
| 26012.0           | 36513.2 | 46721.8 | 55609.1 | 62588.2 | 76124.8 | 93399.2 | 116950.0 |
| 26124.9           | 36545.8 | 46759.8 | 55650.5 | 62669.1 | 76156.1 | 93476.0 | 117023.2 |

## Supporting Information

|         |         |         |         |         |         |         |          |
|---------|---------|---------|---------|---------|---------|---------|----------|
| 26325.9 | 36698.3 | 46781.0 | 55709.4 | 62711.9 | 76315.4 | 93631.4 | 117312.9 |
| 26473.7 | 36704.2 | 46808.3 | 55748.5 | 62734.9 | 76341.5 | 93678.0 | 117330.5 |
| 27648.0 | 36741.9 | 46840.9 | 55785.0 | 62981.9 | 76491.4 | 93755.8 | 117724.0 |
| 27712.5 | 36800.7 | 46899.1 | 55825.4 | 63022.1 | 76543.1 | 93777.4 | 117881.4 |
| 27771.7 | 36837.2 | 46923.9 | 55876.0 | 63071.7 | 76571.1 | 93840.3 | 118132.1 |
| 27799.3 | 36863.9 | 46975.7 | 55926.2 | 63137.8 | 76619.3 | 93888.0 | 118152.0 |
| 27829.3 | 36940.7 | 46985.5 | 55932.8 | 63251.3 | 76763.3 | 94377.4 | 118249.7 |
| 27994.9 | 36978.0 | 46996.8 | 56018.0 | 63439.9 | 77927.4 | 94424.4 | 118329.4 |
| 28153.0 | 37014.8 | 47020.1 | 56053.0 | 63479.9 | 78457.7 | 94453.1 | 118572.2 |
| 28247.4 | 37219.1 | 47025.0 | 56139.0 | 63494.8 | 78536.9 | 94516.0 | 119204.8 |
| 28265.3 | 37237.5 | 47088.1 | 56306.1 | 63580.8 | 78806.8 | 94689.2 | 119752.0 |
| 28358.5 | 37270.8 | 47168.6 | 56453.4 | 63659.3 | 78913.4 | 94837.9 | 120323.9 |
| 28466.6 | 37322.0 | 47259.1 | 56479.2 | 63854.5 | 78984.6 | 95047.5 | 123523.2 |
| 28515.7 | 37733.4 | 47417.6 | 56481.1 | 63949.0 | 79056.0 | 95061.6 | 124066.0 |
| 28719.0 | 37848.5 | 47454.3 | 56635.5 | 64001.9 | 79091.6 | 95111.0 | 125319.3 |
| 28791.7 | 37861.9 | 47475.4 | 56789.9 | 64063.0 | 79117.7 | 95121.7 | 126398.8 |
| 28823.1 | 37887.2 | 47508.5 | 56833.1 | 64092.3 | 79412.7 | 95163.2 | 126865.2 |
| 28922.4 | 37915.4 | 47550.2 | 56923.0 | 64119.0 | 79735.1 | 95250.9 | 127675.5 |
| 29047.8 | 37965.2 | 47605.4 | 56945.8 | 64154.2 | 79869.5 | 95273.7 | 128850.7 |
| 29086.4 | 38062.4 | 47674.6 | 56978.3 | 64165.1 | 80030.2 | 95288.3 | 131542.6 |
| 29131.3 | 38069.9 | 47690.5 | 57052.9 | 64182.8 | 80140.5 | 95441.8 | 131855.4 |
| 29184.2 | 38081.4 | 47707.8 | 57069.7 | 64304.2 | 80198.6 | 95613.9 | 132397.8 |
| 29310.4 | 38089.8 | 47713.1 | 57118.9 | 64384.7 | 80379.5 | 95677.9 | 133000.8 |
| 29357.2 | 38126.8 | 47758.9 | 57142.5 | 64452.3 | 80590.7 | 95695.2 | 133184.0 |
| 29421.6 | 38274.7 | 47789.3 | 57176.7 | 64496.9 | 80678.4 | 95786.1 | 133983.6 |
| 29477.7 | 38286.6 | 47819.7 | 57209.2 | 64550.9 | 80818.9 | 95880.9 | 134321.9 |
| 29519.1 | 38302.5 | 47824.3 | 57216.1 | 64583.3 | 80917.2 | 95997.4 | 134761.4 |
| 29572.4 | 38333.9 | 47830.0 | 57229.5 | 64588.9 | 80933.8 | 96250.6 | 135089.6 |
| 29643.8 | 38361.2 | 47912.1 | 57236.4 | 64606.1 | 80941.1 | 96495.3 | 135851.9 |
| 29670.7 | 38444.2 | 47925.1 | 57255.8 | 64772.3 | 80991.1 | 96613.3 | 136091.2 |
| 29696.3 | 38487.9 | 47961.9 | 57329.8 | 64826.6 | 81082.6 | 96680.2 | 137179.2 |
| 29756.2 | 38535.6 | 47979.7 | 57388.8 | 64857.3 | 81095.0 | 96702.8 | 137220.1 |
| 29780.3 | 38562.5 | 47985.2 | 57404.6 | 64918.7 | 81181.1 | 96772.2 | 138003.6 |
| 29839.8 | 38564.8 | 48033.6 | 57492.1 | 65113.9 | 81217.4 | 96779.1 | 138454.9 |
| 29975.1 | 38681.2 | 48051.2 | 57529.8 | 65154.4 | 81276.2 | 96937.0 | 138527.1 |
| 30045.6 | 38702.6 | 48079.9 | 57540.8 | 65189.1 | 81373.4 | 97034.7 | 138601.1 |
| 30059.6 | 38725.4 | 48134.6 | 57583.0 | 65200.7 | 81487.9 | 97089.2 | 138633.3 |
| 30404.2 | 38768.4 | 48170.6 | 57725.0 | 65309.7 | 81626.3 | 97152.8 | 140519.6 |
| 30550.4 | 38871.7 | 48293.5 | 57818.3 | 65498.7 | 81660.2 | 97182.9 | 141551.8 |
| 30576.3 | 38894.7 | 48336.8 | 57855.7 | 65507.8 | 82022.8 | 97202.2 | 142107.8 |
| 30675.0 | 38937.7 | 48466.7 | 57933.8 | 65554.7 | 82068.5 | 97273.4 | 142264.1 |
| 30759.7 | 38996.1 | 48601.2 | 58103.3 | 65621.7 | 82078.8 | 97296.9 | 142305.2 |
| 30804.1 | 39164.1 | 48611.7 | 58203.6 | 65667.6 | 82091.5 | 97323.2 | 160126.0 |
| 30886.2 | 39251.2 | 48658.2 | 58383.8 | 65946.5 | 82266.9 | 97438.4 | 160857.4 |
| 30913.5 | 39258.5 | 48748.7 | 58417.8 | 65981.0 | 82286.0 | 97463.7 | 162220.9 |
| 31016.0 | 39281.3 | 49029.5 | 58476.5 | 65988.7 | 82472.8 | 97491.1 | 164109.6 |
| 31109.2 | 39361.6 | 49033.5 | 58561.1 | 66100.8 | 82630.0 | 97516.2 | 165055.5 |
| 31125.1 | 39368.4 | 49104.7 | 58705.4 | 66173.9 | 82646.6 | 97579.5 | 165222.2 |
| 31142.4 | 39536.5 | 49194.1 | 58752.8 | 66222.1 | 82680.8 | 97727.0 | 165326.2 |
| 31194.3 | 39965.1 | 49244.4 | 58834.4 | 66237.8 | 82926.0 | 97745.6 | 165557.4 |
| 31235.5 | 39996.8 | 49315.6 | 58839.9 | 66282.7 | 82946.2 | 97861.7 | 167164.0 |
| 31240.9 | 40039.3 | 49415.4 | 58880.7 | 66436.4 | 83048.7 | 97889.7 | 167891.5 |
| 31289.6 | 40060.8 | 49457.4 | 58928.9 | 66602.3 | 83162.2 | 98019.2 | 168595.4 |
| 31342.9 | 40065.8 | 49501.2 | 58937.6 | 66691.1 | 83411.5 | 98400.0 | 170786.3 |
| 31410.1 |         |         |         |         |         |         |          |

**Table S16:** CASSCF computed 21 roots of sextet (red) along with 224 roots of quartet and 490 roots of doublet states for  $[\text{Dy}(\text{C}_5\text{H}_5)_2]^+$  complex. All the values are reported herein  $\text{cm}^{-1}$ .

| 2                |         |         |         |         |          |  |
|------------------|---------|---------|---------|---------|----------|--|
| Spin free states |         |         |         |         |          |  |
| CASSCF           |         |         |         |         |          |  |
| 0.1              | 37261.5 | 47391.8 | 57776.6 | 79875.8 | 98435.4  |  |
| 845.1            | 37286.6 | 47439.9 | 57842.1 | 79878.8 | 98435.4  |  |
| 846.0            | 37286.8 | 47442.0 | 57845.6 | 79884.7 | 98881.1  |  |
| 1083.7           | 37336.2 | 47618.5 | 58073.1 | 79901.6 | 98881.1  |  |
| 1086.6           | 37342.2 | 47623.9 | 58097.5 | 79904.9 | 99010.0  |  |
| 1395.3           | 37346.8 | 47684.7 | 58157.1 | 79912.2 | 99010.0  |  |
| 1398.6           | 37455.1 | 47692.4 | 58197.4 | 79923.0 | 99253.0  |  |
| 1584.8           | 37456.5 | 47712.7 | 58198.1 | 79971.0 | 99253.5  |  |
| 1713.5           | 37459.7 | 47745.2 | 58907.2 | 79976.6 | 100822.0 |  |
| 1739.9           | 37461.1 | 47753.3 | 58984.9 | 80026.1 | 100822.0 |  |
| 8181.4           | 37602.4 | 47818.5 | 59006.9 | 80038.4 | 101010.2 |  |
| 8313.3           | 37624.5 | 47819.2 | 59025.9 | 80048.8 | 101010.2 |  |
| 8332.5           | 37711.5 | 47919.9 | 59033.6 | 80141.4 | 101263.3 |  |

Supporting Information

|         |         |         |         |         |          |
|---------|---------|---------|---------|---------|----------|
| 8415.4  | 37712.1 | 47920.0 | 59296.4 | 80141.9 | 101263.4 |
| 8427.7  | 37726.9 | 47976.8 | 59360.1 | 80295.8 | 101464.2 |
| 8624.9  | 37839.1 | 47977.8 | 59360.7 | 80295.8 | 101465.0 |
| 8626.4  | 37841.0 | 48067.2 | 59612.2 | 80453.5 | 101543.0 |
| 33837.9 | 38141.9 | 48067.2 | 59621.6 | 80453.5 | 101553.1 |
| 35635.4 | 38150.6 | 48274.8 | 59886.9 | 80607.5 | 101554.7 |
| 35643.5 | 38153.0 | 48274.8 | 59886.9 | 80607.5 | 101582.5 |
| 24601.8 | 38376.0 | 48366.3 | 60004.7 | 80815.0 | 101592.8 |
| 24601.9 | 38376.2 | 48366.3 | 60004.7 | 80815.0 | 102556.0 |
| 24863.3 | 38643.2 | 48545.6 | 60168.8 | 81108.8 | 102624.6 |
| 24864.5 | 38643.2 | 48545.6 | 60169.9 | 81108.8 | 102633.3 |
| 25058.5 | 38747.9 | 48869.0 | 60504.0 | 84235.6 | 102791.1 |
| 25076.3 | 38747.9 | 48869.0 | 60505.7 | 84704.0 | 102795.7 |
| 25082.8 | 38932.3 | 49234.5 | 60575.5 | 84708.5 | 102970.6 |
| 25091.6 | 38933.0 | 49234.5 | 60631.6 | 85820.2 | 102970.7 |
| 25121.2 | 38981.7 | 49648.3 | 60639.9 | 85831.6 | 103158.7 |
| 25160.3 | 38982.7 | 49648.3 | 60987.9 | 85850.3 | 103158.7 |
| 25180.9 | 39028.8 | 49982.5 | 60988.7 | 85928.3 | 103484.8 |
| 25228.9 | 39030.4 | 49982.5 | 61656.4 | 86002.6 | 103484.8 |
| 25229.4 | 39051.3 | 51643.3 | 61663.0 | 86052.3 | 104974.7 |
| 25276.8 | 39092.7 | 51644.0 | 61690.2 | 86053.9 | 105180.2 |
| 25283.3 | 39095.3 | 51693.2 | 61737.4 | 86088.5 | 105237.0 |
| 25376.9 | 39095.4 | 51693.7 | 61741.0 | 86096.2 | 105653.5 |
| 25393.8 | 39096.9 | 51697.4 | 61855.6 | 86131.1 | 105659.6 |
| 25430.2 | 41693.1 | 51705.0 | 61856.2 | 86132.7 | 106183.0 |
| 25444.7 | 41818.7 | 51725.3 | 62061.1 | 86704.2 | 106183.2 |
| 25465.3 | 41824.9 | 51758.7 | 62061.2 | 86745.7 | 106204.4 |
| 25490.7 | 41829.1 | 51763.1 | 62351.2 | 86796.7 | 106237.4 |
| 25500.3 | 41834.5 | 51763.8 | 62351.3 | 86801.2 | 106250.1 |
| 25533.4 | 41836.1 | 51765.1 | 62733.9 | 86822.6 | 106250.2 |
| 25544.7 | 41847.8 | 51953.3 | 62733.9 | 87045.5 | 106317.2 |
| 25574.3 | 41853.5 | 51953.4 | 63068.5 | 87047.8 | 106503.2 |
| 25587.3 | 41889.9 | 52230.5 | 63068.5 | 87270.3 | 106508.2 |
| 25588.1 | 41890.6 | 52243.4 | 64000.4 | 87280.0 | 107230.8 |
| 25590.5 | 41990.9 | 52322.6 | 64001.0 | 87329.6 | 107231.3 |
| 25594.9 | 41991.0 | 52377.6 | 64065.3 | 87387.5 | 108011.6 |
| 25604.3 | 42145.5 | 52381.4 | 64073.2 | 87399.9 | 108011.6 |
| 25614.3 | 42145.6 | 52464.8 | 64079.2 | 87545.7 | 109908.4 |
| 25621.6 | 42341.8 | 52465.0 | 64129.2 | 87546.0 | 109908.6 |
| 25621.7 | 42341.8 | 52562.5 | 64207.3 | 87630.7 | 110586.6 |
| 25666.9 | 42413.8 | 52562.8 | 66622.1 | 87634.7 | 110589.8 |
| 25667.0 | 42418.5 | 52596.9 | 66623.6 | 88076.2 | 110834.9 |
| 25877.7 | 42549.4 | 52597.0 | 67331.0 | 88076.6 | 110873.8 |
| 25877.7 | 42549.4 | 52665.0 | 67375.4 | 88258.0 | 110974.2 |
| 26151.5 | 42612.9 | 52665.1 | 67411.1 | 88258.1 | 113934.8 |
| 26151.6 | 42614.9 | 52976.9 | 67538.0 | 88683.8 | 115269.6 |
| 26201.3 | 42735.2 | 52976.9 | 67538.8 | 88683.9 | 115285.2 |
| 26201.3 | 42735.2 | 54791.5 | 67754.4 | 88903.2 | 119540.3 |
| 26682.7 | 42999.8 | 54850.4 | 67754.7 | 88903.2 | 119576.1 |
| 26683.3 | 43007.2 | 55002.8 | 68068.8 | 89115.6 | 119609.0 |
| 26772.4 | 43056.4 | 55139.1 | 68068.8 | 89115.6 | 119743.8 |
| 26784.0 | 43274.9 | 55155.6 | 68374.3 | 93377.3 | 119744.5 |
| 26924.0 | 43284.2 | 55168.4 | 68569.7 | 93377.5 | 119984.9 |
| 26961.8 | 43298.9 | 55202.7 | 68569.7 | 93576.6 | 119985.4 |
| 26965.2 | 43301.4 | 55465.8 | 69585.9 | 93584.7 | 120293.2 |
| 29444.0 | 43316.0 | 55468.8 | 69586.0 | 93750.1 | 120293.2 |
| 29444.1 | 43316.0 | 55613.0 | 69617.0 | 93750.2 | 120664.6 |
| 29708.2 | 43356.0 | 55623.4 | 69617.9 | 93785.1 | 120664.6 |
| 29708.2 | 43361.3 | 55625.3 | 69640.4 | 95137.0 | 121152.3 |
| 29720.8 | 43366.6 | 55628.8 | 69640.7 | 95137.0 | 121152.3 |
| 29720.9 | 43385.4 | 55649.7 | 69721.0 | 95414.2 | 121902.2 |
| 29725.4 | 43395.5 | 55714.7 | 69722.6 | 95414.5 | 121902.2 |
| 29726.2 | 43398.1 | 55722.5 | 69734.3 | 95488.6 | 122270.2 |
| 29822.5 | 43417.7 | 55817.9 | 69735.0 | 95489.7 | 122271.5 |
| 29824.2 | 43454.9 | 55818.2 | 69735.4 | 95531.5 | 123404.9 |
| 29942.8 | 43483.2 | 55953.8 | 69740.9 | 95533.0 | 123430.3 |
| 29953.7 | 43491.2 | 55953.9 | 69772.8 | 95625.8 | 123695.3 |
| 30012.3 | 43519.1 | 56114.4 | 69857.3 | 95642.9 | 131539.0 |
| 30097.3 | 43519.9 | 56114.4 | 69861.5 | 95694.0 | 131837.8 |
| 30102.3 | 43615.5 | 56242.2 | 70867.5 | 95857.0 | 131865.8 |
| 31281.5 | 43615.6 | 56272.2 | 71020.1 | 95857.1 | 132505.8 |
| 31283.2 | 43637.1 | 56272.4 | 71021.5 | 96012.8 | 132510.7 |
| 31317.3 | 43670.9 | 56274.9 | 71994.3 | 96014.2 | 133668.2 |
| 31317.3 | 43716.2 | 56342.7 | 71995.7 | 96047.6 | 133668.8 |
| 31341.7 | 43716.2 | 56342.9 | 73198.8 | 96055.3 | 139205.4 |
| 31367.4 | 43891.3 | 56408.2 | 73200.0 | 96126.2 | 139205.4 |
| 31376.9 | 43891.3 | 56421.6 | 73391.2 | 96143.0 | 139723.0 |

## Supporting Information

|         |         |         |         |         |          |
|---------|---------|---------|---------|---------|----------|
| 31430.1 | 43925.1 | 56422.0 | 73493.6 | 96156.0 | 139723.9 |
| 31430.6 | 43925.1 | 56453.8 | 73535.7 | 96156.5 | 140367.3 |
| 31451.1 | 44022.6 | 56468.9 | 73557.4 | 96195.6 | 140371.7 |
| 31451.1 | 44026.0 | 56500.3 | 73577.9 | 96391.1 | 140661.5 |
| 31473.0 | 44618.2 | 56502.7 | 73582.2 | 96391.2 | 140724.2 |
| 31473.0 | 44665.2 | 56536.0 | 76663.9 | 96514.6 | 140764.5 |
| 31530.6 | 44675.3 | 56536.0 | 76668.1 | 96515.0 | 142186.2 |
| 31530.7 | 44812.9 | 56541.3 | 76672.7 | 96581.1 | 142187.6 |
| 31532.9 | 44817.7 | 56541.4 | 76678.0 | 96695.2 | 143530.1 |
| 31532.9 | 44989.0 | 56723.0 | 76685.7 | 96718.6 | 145659.5 |
| 33012.0 | 44990.1 | 56725.9 | 76738.9 | 96756.1 | 145659.5 |
| 33039.0 | 45001.2 | 56729.6 | 76739.2 | 96756.1 | 146369.0 |
| 33097.5 | 45002.0 | 56770.6 | 76997.8 | 96846.9 | 146369.0 |
| 33098.4 | 45006.9 | 56778.5 | 76997.9 | 96861.9 | 146700.1 |
| 33191.7 | 45009.8 | 56791.2 | 77116.7 | 97037.5 | 146700.8 |
| 34458.9 | 45080.1 | 56791.5 | 77116.8 | 97037.5 | 146740.5 |
| 34459.1 | 45135.8 | 56808.5 | 77140.3 | 97068.6 | 146745.1 |
| 34470.5 | 45142.8 | 56844.3 | 77853.3 | 97072.7 | 146766.4 |
| 34471.2 | 45152.4 | 56854.0 | 77856.9 | 97148.5 | 146786.1 |
| 34669.3 | 45173.9 | 56854.9 | 78493.8 | 97179.3 | 146795.7 |
| 34687.3 | 45177.2 | 56867.5 | 78510.9 | 97182.3 | 173605.2 |
| 34698.0 | 45178.9 | 56875.2 | 79060.3 | 97320.2 | 173809.0 |
| 34747.5 | 45218.8 | 56876.3 | 79144.1 | 97320.7 | 173855.6 |
| 34793.9 | 45218.8 | 56902.2 | 79152.7 | 97515.6 | 175032.6 |
| 34798.2 | 45484.5 | 56916.6 | 79391.6 | 97580.8 | 175034.8 |
| 34800.1 | 45484.6 | 56965.8 | 79391.6 | 97593.4 | 177610.9 |
| 37078.2 | 45559.8 | 56965.9 | 79639.6 | 97593.6 | 177944.2 |
| 37078.3 | 45587.7 | 57386.4 | 79639.6 | 97598.6 | 177944.6 |
| 37099.6 | 45904.9 | 57386.5 | 79767.2 | 97968.2 | 177987.9 |
| 37099.7 | 45904.9 | 57456.0 | 79770.5 | 97968.2 | 178076.8 |
| 37248.4 | 46295.4 | 57456.3 | 79823.1 | 98168.8 | 179372.4 |
| 37249.6 | 46325.7 | 57775.5 | 79856.3 | 98191.9 | 179374.9 |
| 37258.4 | 46588.9 |         |         |         |          |

**Table S17:** NEVPT2 computed 21 roots of sextet (red) along with 224 roots of quartet and 490 roots of doublet states for  $[\text{Dy}(\text{C}_5\text{H}_5)_2]^+$  complex. All the values are reported herein  $\text{cm}^{-1}$ .

| 2                |         |         |         |         |         |
|------------------|---------|---------|---------|---------|---------|
| Spin free states |         |         |         |         |         |
| NEVPT2           |         |         |         |         |         |
| 0.6              | 35400.1 | 45467.2 | 55480.0 | 75607.8 | 91779.7 |
| 923.3            | 35648.5 | 45595.9 | 55582.0 | 75668.5 | 92347.9 |
| 926.2            | 35775.3 | 45599.3 | 55619.1 | 75740.3 | 92347.9 |
| 1071.4           | 36028.8 | 45697.9 | 55619.5 | 75861.2 | 92779.9 |
| 1080.3           | 36029.5 | 45697.9 | 55702.8 | 76028.4 | 92780.0 |
| 1427.3           | 37786.2 | 45736.7 | 55805.1 | 76028.8 | 92848.0 |
| 1441.0           | 37786.5 | 45736.7 | 55952.1 | 76173.8 | 92848.0 |
| 1652.9           | 37815.9 | 45977.6 | 55962.5 | 76249.4 | 93421.6 |
| 1830.8           | 37816.4 | 45977.6 | 55966.1 | 76275.6 | 93421.6 |
| 1848.9           | 37932.5 | 50034.3 | 56068.0 | 76437.3 | 93593.2 |
| 6931.0           | 37943.8 | 50035.9 | 56078.7 | 76468.5 | 93593.3 |
| 7122.2           | 37996.7 | 50091.7 | 56082.6 | 76680.2 | 93873.9 |
| 7185.5           | 37999.3 | 50094.4 | 56089.7 | 76745.5 | 93874.1 |
| 7210.4           | 38008.5 | 50116.8 | 56094.6 | 76748.4 | 94109.5 |
| 7239.6           | 38010.9 | 50117.2 | 56094.7 | 76782.4 | 94111.0 |
| 7477.7           | 38051.1 | 50125.8 | 56464.1 | 76876.5 | 94155.3 |
| 7482.4           | 38058.3 | 50127.4 | 56465.7 | 77127.7 | 94156.9 |
| 28453.1          | 38067.3 | 50155.9 | 56777.7 | 77130.1 | 94176.6 |
| 30337.8          | 38236.6 | 50163.7 | 56781.4 | 77290.5 | 94195.7 |
| 30367.2          | 38237.5 | 50182.6 | 57097.9 | 77290.6 | 94203.9 |
| 24050.5          | 38245.6 | 50202.4 | 57098.5 | 77479.5 | 94406.4 |
| 24186.9          | 38249.1 | 50212.9 | 57127.0 | 77479.5 | 94575.5 |
| 24210.4          | 38300.7 | 50218.5 | 57127.2 | 77647.1 | 94660.9 |
| 24210.6          | 38300.7 | 50218.6 | 57395.9 | 77647.1 | 94680.9 |
| 24498.1          | 38414.4 | 50221.4 | 57416.3 | 77848.5 | 94691.0 |
| 24500.3          | 38414.5 | 50258.1 | 57421.0 | 77848.5 | 94778.0 |
| 24534.6          | 38580.4 | 50258.9 | 57461.1 | 78192.1 | 94863.6 |
| 24569.1          | 38582.7 | 50352.5 | 57474.7 | 78192.1 | 94869.8 |
| 24721.2          | 38608.3 | 50352.6 | 57615.0 | 79272.9 | 95059.2 |
| 24722.3          | 38611.8 | 50398.7 | 57616.7 | 79296.3 | 95060.4 |
| 24905.1          | 38659.9 | 50398.8 | 58081.4 | 79327.5 | 95252.5 |
| 24929.9          | 38672.7 | 50492.8 | 58085.3 | 79459.8 | 95262.5 |
| 25117.1          | 38682.8 | 50492.8 | 58133.1 | 79579.3 | 95264.9 |
| 25118.9          | 38759.6 | 50710.8 | 58164.8 | 79700.8 | 95265.0 |
| 25129.5          | 38761.5 | 50710.8 | 58172.5 | 79710.7 | 95679.1 |
| 25183.8          | 38762.8 | 51009.8 | 58280.1 | 79734.1 | 95679.1 |

## Supporting Information

|         |         |         |         |         |          |
|---------|---------|---------|---------|---------|----------|
| 25209.3 | 38763.9 | 51009.8 | 58281.9 | 79738.1 | 95866.2  |
| 25421.9 | 38767.8 | 51308.0 | 58507.3 | 79890.6 | 95866.3  |
| 25452.9 | 39521.1 | 51323.4 | 58507.5 | 79913.9 | 95875.8  |
| 25454.7 | 39534.2 | 51369.8 | 58829.4 | 79983.1 | 95878.5  |
| 25462.9 | 39881.3 | 51369.8 | 58829.4 | 80012.5 | 96734.7  |
| 25471.3 | 39886.5 | 51425.4 | 59261.1 | 80034.8 | 96851.8  |
| 25486.9 | 40311.0 | 51492.9 | 59261.1 | 80262.9 | 96929.6  |
| 25511.9 | 40325.4 | 51500.5 | 59468.8 | 80270.9 | 97013.3  |
| 25536.5 | 40513.4 | 51595.1 | 59469.9 | 80779.6 | 97026.8  |
| 25571.7 | 40651.6 | 51596.1 | 59471.6 | 80780.2 | 97841.7  |
| 25638.5 | 40714.0 | 51695.9 | 59516.9 | 80966.8 | 97843.5  |
| 25692.7 | 40835.8 | 51696.0 | 59529.0 | 81024.6 | 98656.6  |
| 25880.3 | 40890.0 | 51697.9 | 59553.1 | 81060.3 | 98656.6  |
| 25897.4 | 41057.7 | 51699.3 | 59573.2 | 81092.0 | 100523.5 |
| 25979.2 | 41247.8 | 51756.6 | 59573.2 | 81101.7 | 100524.0 |
| 25988.9 | 41310.2 | 51756.7 | 59671.8 | 81244.1 | 101291.6 |
| 25991.1 | 41644.1 | 51774.6 | 60461.6 | 81250.6 | 101297.5 |
| 26186.6 | 41655.6 | 51774.6 | 60482.4 | 81483.6 | 101543.7 |
| 26240.6 | 42244.4 | 51930.7 | 62352.8 | 81483.9 | 101601.8 |
| 26420.7 | 42384.0 | 51931.0 | 63488.8 | 81785.8 | 101717.1 |
| 26506.7 | 42930.6 | 52150.7 | 63543.6 | 81786.8 | 103827.5 |
| 26534.6 | 42987.5 | 52150.7 | 63591.1 | 81931.1 | 105196.0 |
| 26574.0 | 42988.8 | 52150.8 | 63726.4 | 81931.1 | 105235.1 |
| 26757.9 | 42994.2 | 52199.4 | 63729.7 | 82587.5 | 110462.1 |
| 27134.2 | 43027.2 | 52254.1 | 63950.5 | 82587.6 | 110499.4 |
| 27362.2 | 43030.0 | 52254.1 | 63952.1 | 83257.6 | 110538.0 |
| 27648.7 | 43062.0 | 52329.5 | 64264.0 | 83257.6 | 110675.3 |
| 27650.6 | 43067.0 | 52559.3 | 64264.1 | 85294.8 | 110678.1 |
| 27884.4 | 43076.3 | 52579.5 | 64814.6 | 85296.4 | 110933.5 |
| 27884.4 | 43155.2 | 52579.5 | 64814.7 | 85445.3 | 110935.4 |
| 28291.2 | 43163.3 | 52621.6 | 65221.0 | 85463.7 | 111024.8 |
| 28291.4 | 43216.2 | 52630.3 | 65223.5 | 85597.0 | 111025.3 |
| 29632.8 | 43223.0 | 52645.0 | 65869.2 | 85610.1 | 111253.0 |
| 29632.9 | 43263.7 | 52651.1 | 65897.6 | 85683.2 | 111253.1 |
| 29929.1 | 43290.9 | 52696.8 | 65898.5 | 87654.8 | 111625.1 |
| 29929.9 | 43318.6 | 52765.8 | 66445.9 | 87654.9 | 111625.1 |
| 29958.6 | 43320.0 | 52799.8 | 66446.2 | 87802.6 | 112130.6 |
| 29958.8 | 43322.2 | 52820.3 | 66461.8 | 87954.9 | 112130.6 |
| 30011.5 | 43328.7 | 52925.5 | 66464.9 | 88016.9 | 112277.9 |
| 30011.7 | 43357.1 | 52945.9 | 66495.4 | 88047.8 | 112320.5 |
| 30043.1 | 43359.5 | 53030.5 | 66496.6 | 88048.7 | 112600.3 |
| 30048.1 | 43571.1 | 53050.1 | 66630.1 | 88049.8 | 113012.2 |
| 30159.6 | 43571.2 | 53267.4 | 66634.6 | 88049.8 | 113012.2 |
| 30171.9 | 43827.5 | 53269.8 | 66638.2 | 88301.0 | 118616.6 |
| 30227.6 | 43827.6 | 53559.5 | 66644.8 | 88304.2 | 118974.8 |
| 30345.8 | 43836.2 | 53561.8 | 66652.0 | 88422.1 | 119006.4 |
| 30348.5 | 43838.2 | 53713.6 | 66652.4 | 88423.0 | 119620.4 |
| 30355.9 | 43840.8 | 53759.6 | 66659.7 | 88537.1 | 119626.5 |
| 30386.1 | 43849.7 | 53802.2 | 66674.4 | 88560.6 | 120896.3 |
| 30492.4 | 43863.6 | 53803.9 | 66779.4 | 88567.5 | 120897.6 |
| 30494.2 | 43889.9 | 53812.9 | 66781.8 | 88590.7 | 127109.8 |
| 30585.4 | 43894.2 | 53826.9 | 66887.1 | 88606.1 | 127109.8 |
| 32123.6 | 43901.4 | 53988.0 | 66918.2 | 88611.7 | 127628.1 |
| 32123.8 | 43907.2 | 54081.3 | 67342.4 | 88613.5 | 127630.8 |
| 32199.3 | 43993.4 | 54130.8 | 67344.6 | 89210.3 | 128394.9 |
| 32226.4 | 43993.8 | 54131.5 | 67498.1 | 89386.3 | 128402.4 |
| 32233.7 | 44162.9 | 54159.5 | 67857.7 | 89492.6 | 128709.9 |
| 32241.0 | 44162.9 | 54160.4 | 67869.9 | 89657.4 | 128806.7 |
| 32241.0 | 44287.4 | 54161.6 | 69892.7 | 89660.0 | 128815.4 |
| 32290.2 | 44287.5 | 54167.5 | 70310.3 | 89670.9 | 128887.5 |
| 32292.6 | 44375.4 | 54207.2 | 70311.5 | 89675.2 | 128905.3 |
| 32338.5 | 44375.4 | 54212.6 | 70315.6 | 89704.5 | 130428.2 |
| 32338.6 | 44597.9 | 54264.9 | 70317.2 | 89706.4 | 132823.9 |
| 32342.9 | 44597.9 | 54278.1 | 70327.3 | 89719.8 | 132824.0 |
| 32343.0 | 44681.0 | 54296.3 | 70365.2 | 89746.2 | 133677.3 |
| 32425.3 | 44681.0 | 54323.1 | 70366.5 | 89798.5 | 133677.3 |
| 32425.3 | 44845.7 | 54327.1 | 70495.2 | 89848.3 | 134072.2 |
| 32427.7 | 44850.4 | 54350.1 | 70504.8 | 89883.6 | 134073.0 |
| 32427.7 | 44916.5 | 54354.7 | 70780.0 | 89883.8 | 134075.5 |
| 33221.0 | 44938.6 | 54360.4 | 70780.6 | 90030.7 | 134086.6 |
| 33222.6 | 44948.0 | 54363.1 | 70853.8 | 90058.1 | 134121.3 |
| 33239.7 | 44965.4 | 54494.5 | 70862.5 | 90095.4 | 134136.6 |
| 33240.8 | 44974.0 | 54495.1 | 71157.1 | 90154.6 | 134150.4 |
| 33484.1 | 44983.1 | 54581.1 | 71187.1 | 90175.5 | 156716.6 |
| 33494.4 | 44983.2 | 54581.6 | 71853.5 | 90176.2 | 156875.6 |
| 33525.7 | 45001.6 | 54928.4 | 71921.9 | 90424.2 | 156891.5 |
| 33597.2 | 45030.1 | 54981.0 | 71974.1 | 90424.8 | 157795.0 |

## Supporting Information

|         |         |         |         |         |          |
|---------|---------|---------|---------|---------|----------|
| 33655.8 | 45034.4 | 54985.3 | 74813.8 | 90808.3 | 157810.4 |
| 33661.9 | 45087.0 | 54995.4 | 75081.5 | 90809.0 | 159981.2 |
| 33668.5 | 45120.6 | 55004.5 | 75081.5 | 91012.8 | 160205.5 |
| 34443.6 | 45186.7 | 55014.6 | 75316.5 | 91030.7 | 160210.1 |
| 34640.8 | 45197.0 | 55042.9 | 75321.9 | 91030.8 | 160495.4 |
| 34938.2 | 45287.4 | 55052.0 | 75379.5 | 91034.8 | 160647.0 |
| 34969.5 | 45287.6 | 55053.0 | 75379.6 | 91362.4 | 162447.4 |
| 35055.3 | 45465.8 | 55191.9 | 75519.4 | 91362.8 | 162450.7 |
| 35197.9 | 45465.8 | 55192.2 | 75581.6 | 91779.6 |          |
| 35249.5 | 45467.2 | 55479.8 |         |         |          |

**Table S18:** CASSCF computed the spin-orbit states for  $[\text{Dy}(\text{C}_5\text{H}_5)_2]^+$  complex. All the values are reported here in  $\text{cm}^{-1}$ .

| 2                 |         |         |         |         |         |         |          |
|-------------------|---------|---------|---------|---------|---------|---------|----------|
| Spin Orbit states |         |         |         |         |         |         |          |
| CASSCF            |         |         |         |         |         |         |          |
| 0.0               | 31004.2 | 40565.1 | 50563.8 | 61152.1 | 70680.4 | 89912.8 | 105430.1 |
| 496.4             | 31011.7 | 40596.7 | 50621.6 | 61185.1 | 70708.5 | 90163.9 | 105542.6 |
| 819.6             | 31754.0 | 40746.2 | 50623.6 | 61246.8 | 70885.5 | 90164.1 | 105653.9 |
| 1047.2            | 32046.4 | 40761.1 | 50639.1 | 61260.9 | 70967.9 | 90212.3 | 105900.6 |
| 1247.3            | 32180.1 | 40781.1 | 50669.6 | 61428.6 | 71627.4 | 90262.3 | 105904.6 |
| 1421.7            | 32218.6 | 40806.5 | 50687.4 | 61456.3 | 72082.8 | 90281.4 | 105949.6 |
| 1544.0            | 32226.7 | 40840.9 | 50713.0 | 61532.9 | 72160.0 | 90532.9 | 106195.9 |
| 1646.5            | 32241.8 | 40866.6 | 50731.6 | 61583.9 | 72209.5 | 90584.4 | 106259.2 |
| 3344.9            | 32266.0 | 40889.1 | 50856.0 | 61627.1 | 72325.5 | 90630.5 | 106496.2 |
| 3559.5            | 32285.5 | 40927.0 | 50896.7 | 61669.0 | 72544.7 | 90774.4 | 106535.1 |
| 3903.5            | 32293.6 | 40947.3 | 51056.4 | 61688.1 | 72871.6 | 90809.8 | 106598.4 |
| 4180.3            | 32341.0 | 40983.9 | 51062.7 | 61725.8 | 73184.8 | 90967.4 | 106649.3 |
| 4350.3            | 32346.2 | 40988.1 | 51133.6 | 61737.0 | 73293.9 | 91003.9 | 106821.3 |
| 4447.0            | 32426.5 | 41017.0 | 51169.0 | 61835.9 | 74436.7 | 91073.9 | 107557.1 |
| 4499.1            | 32442.1 | 41023.8 | 51177.3 | 61862.3 | 74541.6 | 91133.6 | 107665.6 |
| 5732.6            | 32451.9 | 41079.3 | 51201.8 | 61876.6 | 74630.5 | 91169.5 | 107827.6 |
| 5885.4            | 32471.8 | 41239.8 | 51301.0 | 61896.7 | 74736.5 | 91248.2 | 107933.9 |
| 6167.2            | 32620.9 | 41470.3 | 51303.9 | 62008.0 | 74833.5 | 91252.2 | 107995.0 |
| 6439.4            | 32744.6 | 42236.8 | 51373.4 | 62021.6 | 75006.2 | 91328.6 | 108003.7 |
| 6576.4            | 32804.7 | 42305.0 | 51416.4 | 62069.1 | 75008.8 | 91424.6 | 108023.2 |
| 6632.8            | 33037.4 | 42380.4 | 51419.5 | 62089.4 | 75020.9 | 91460.8 | 109193.4 |
| 7583.1            | 33139.4 | 42423.1 | 51473.5 | 62157.9 | 75052.4 | 91472.0 | 109412.0 |
| 7695.9            | 33253.1 | 42586.3 | 51512.3 | 62167.4 | 75109.7 | 91653.8 | 109731.0 |
| 7952.8            | 33348.4 | 42891.1 | 51552.6 | 62203.9 | 75146.2 | 91785.8 | 109774.1 |
| 8224.3            | 33403.4 | 42996.7 | 51637.6 | 62426.2 | 75154.9 | 91851.1 | 109833.7 |
| 8286.1            | 33982.8 | 43066.4 | 51671.4 | 62448.9 | 75157.8 | 91925.2 | 109939.0 |
| 8978.0            | 34043.4 | 43123.8 | 51778.8 | 62465.6 | 75232.8 | 92009.3 | 110033.2 |
| 9063.9            | 34046.5 | 43247.5 | 51781.3 | 62478.5 | 75254.5 | 92060.9 | 110071.4 |
| 9505.6            | 34054.1 | 43266.4 | 51954.3 | 62517.6 | 75362.3 | 92108.0 | 110150.7 |
| 9603.2            | 34076.5 | 43290.6 | 51978.8 | 62542.0 | 75552.2 | 92210.9 | 110205.1 |
| 9956.7            | 34094.1 | 43297.2 | 52194.0 | 62561.9 | 75558.7 | 92211.7 | 110352.6 |
| 10263.0           | 34102.5 | 43333.9 | 52280.0 | 62567.1 | 75650.2 | 92314.4 | 110532.3 |
| 10298.9           | 34153.5 | 43344.1 | 52296.1 | 62618.5 | 75727.7 | 92537.0 | 110585.1 |
| 10346.7           | 34173.4 | 43354.3 | 52321.6 | 62622.1 | 75751.0 | 92684.4 | 110861.7 |
| 10403.4           | 34319.6 | 43417.1 | 52361.9 | 62677.3 | 75756.0 | 93024.2 | 111027.2 |
| 10490.1           | 34324.8 | 43431.0 | 52428.6 | 62836.0 | 75831.1 | 93078.3 | 111175.8 |
| 10506.6           | 34382.4 | 43433.7 | 52467.8 | 62955.8 | 75864.5 | 93958.5 | 111337.6 |
| 10640.8           | 34386.7 | 43444.1 | 52535.7 | 63117.0 | 75911.5 | 94093.0 | 111883.8 |
| 10726.5           | 34408.5 | 43535.1 | 52692.6 | 63171.1 | 75927.9 | 94414.0 | 113106.4 |
| 11657.7           | 34438.4 | 43536.8 | 52811.3 | 63247.0 | 76141.2 | 94940.6 | 113130.8 |
| 11716.3           | 34479.6 | 44647.2 | 52904.4 | 63328.6 | 77487.4 | 95194.4 | 113179.2 |
| 11764.3           | 34488.5 | 44696.3 | 53138.5 | 63370.8 | 77521.2 | 95268.3 | 113260.7 |
| 11775.8           | 34589.8 | 44869.0 | 53152.8 | 63453.5 | 77836.2 | 95423.5 | 113577.2 |
| 11888.6           | 34596.2 | 45008.3 | 53170.7 | 63592.0 | 78540.6 | 95473.0 | 113736.7 |
| 13372.7           | 34624.2 | 45010.8 | 53485.7 | 63599.4 | 79009.5 | 95712.7 | 114014.7 |
| 13407.5           | 34857.0 | 45135.6 | 53760.6 | 63676.8 | 79868.5 | 96140.2 | 114327.5 |
| 13458.8           | 35012.4 | 45155.3 | 53841.6 | 63695.3 | 80438.4 | 96690.8 | 114390.2 |
| 13471.3           | 35105.5 | 45220.6 | 54215.5 | 63761.9 | 80998.3 | 96914.4 | 114574.8 |
| 14683.3           | 35729.6 | 45270.9 | 54536.7 | 63831.7 | 81150.2 | 97020.8 | 114643.5 |
| 14706.7           | 35754.0 | 45346.4 | 54603.2 | 63965.9 | 81253.9 | 97140.1 | 114801.3 |
| 14718.5           | 35890.6 | 45410.1 | 54693.8 | 63973.1 | 81349.0 | 97274.8 | 115017.5 |
| 15506.2           | 35925.2 | 45422.6 | 54756.8 | 63973.9 | 81368.2 | 97472.7 | 115553.1 |
| 15507.1           | 35949.9 | 45442.2 | 54794.6 | 63991.4 | 81378.8 | 97567.3 | 115962.7 |
| 16025.0           | 35981.0 | 45472.8 | 54825.2 | 64006.2 | 81406.7 | 97618.6 | 116151.8 |
| 24411.1           | 36034.3 | 45513.8 | 54877.7 | 64054.8 | 81483.0 | 97803.8 | 116324.1 |

## Supporting Information

|         |         |         |         |         |         |          |          |
|---------|---------|---------|---------|---------|---------|----------|----------|
| 24476.9 | 36079.9 | 45605.8 | 54881.0 | 64073.0 | 81654.8 | 97820.1  | 116592.4 |
| 24553.0 | 36097.1 | 45619.8 | 54897.0 | 64099.0 | 81684.3 | 98333.2  | 117646.8 |
| 24563.4 | 36133.9 | 45647.6 | 54924.8 | 64128.5 | 81706.0 | 98412.9  | 117741.3 |
| 24681.6 | 36205.8 | 45663.4 | 54938.1 | 64153.5 | 81713.3 | 98532.9  | 117895.2 |
| 24864.3 | 36254.2 | 45755.7 | 55045.0 | 64326.1 | 81758.5 | 98626.7  | 117982.0 |
| 24988.1 | 36346.6 | 45836.4 | 55109.5 | 64394.2 | 81781.4 | 99137.5  | 118419.2 |
| 25220.0 | 36529.8 | 45917.3 | 55155.6 | 64423.8 | 81966.6 | 99963.2  | 120374.1 |
| 25469.0 | 36641.0 | 46038.9 | 55205.1 | 64443.2 | 81979.1 | 99967.5  | 121505.4 |
| 25600.0 | 36643.6 | 46220.0 | 55439.3 | 64524.2 | 82007.8 | 100034.5 | 124981.0 |
| 25629.9 | 37014.1 | 46457.1 | 55545.4 | 64887.0 | 82013.2 | 100060.8 | 125058.4 |
| 25696.4 | 37053.4 | 46596.0 | 55670.4 | 65318.5 | 82040.4 | 100260.0 | 125205.9 |
| 25712.8 | 37142.8 | 46630.4 | 55720.1 | 65351.5 | 82074.7 | 100467.0 | 125421.3 |
| 26695.6 | 37210.1 | 46657.5 | 55800.2 | 65443.6 | 82140.2 | 100511.6 | 125695.1 |
| 27047.2 | 37410.8 | 46706.6 | 55827.8 | 65623.3 | 82175.0 | 100595.1 | 125897.7 |
| 27146.0 | 37417.8 | 46724.1 | 55903.6 | 65722.1 | 82316.3 | 100603.3 | 126020.8 |
| 27175.7 | 37422.0 | 46756.1 | 55922.3 | 65752.4 | 82335.9 | 100633.1 | 126061.6 |
| 27234.2 | 37439.0 | 46833.8 | 55949.3 | 65803.5 | 82352.9 | 100653.0 | 126236.4 |
| 27244.5 | 37477.9 | 46869.6 | 56005.4 | 65866.1 | 82354.6 | 100964.0 | 126536.8 |
| 27376.9 | 37535.8 | 46880.6 | 56029.5 | 65905.2 | 82488.7 | 101263.4 | 126648.9 |
| 27403.6 | 37610.2 | 46883.3 | 56116.3 | 66047.6 | 82658.6 | 101517.0 | 126898.0 |
| 27448.8 | 37680.7 | 46907.1 | 56144.3 | 66229.4 | 82975.7 | 101690.6 | 127326.1 |
| 27454.3 | 37722.3 | 46930.0 | 56269.9 | 66243.4 | 83283.5 | 101700.3 | 127885.7 |
| 27475.7 | 37873.2 | 46953.4 | 56294.3 | 66340.9 | 83421.9 | 101705.5 | 127886.9 |
| 27507.7 | 37946.3 | 47024.6 | 56485.0 | 66460.9 | 84400.8 | 101727.8 | 128687.1 |
| 27519.4 | 37951.2 | 47088.0 | 56554.8 | 66520.3 | 84476.8 | 101762.6 | 128818.9 |
| 27538.1 | 37971.5 | 47141.7 | 56725.0 | 66557.4 | 84631.4 | 101833.3 | 129135.1 |
| 27600.9 | 38065.8 | 47188.8 | 57008.4 | 66639.3 | 84701.2 | 101858.5 | 129205.6 |
| 27842.4 | 38144.8 | 47340.3 | 57340.3 | 66860.6 | 84708.9 | 101923.5 | 130531.1 |
| 28004.1 | 38175.5 | 47390.3 | 57747.5 | 66896.0 | 84737.0 | 102051.0 | 136182.2 |
| 28162.2 | 38202.7 | 47713.1 | 57909.0 | 67094.2 | 84755.6 | 102100.6 | 136670.6 |
| 28196.8 | 38216.4 | 47767.9 | 57918.7 | 67151.0 | 84835.9 | 102282.9 | 137729.1 |
| 28475.6 | 38220.5 | 47787.4 | 57962.2 | 67187.1 | 84870.1 | 102463.1 | 139080.7 |
| 28532.1 | 38222.8 | 47870.1 | 58018.9 | 67245.9 | 84887.8 | 102604.7 | 139446.3 |
| 28561.6 | 38438.5 | 47955.9 | 58022.5 | 67261.6 | 85037.7 | 102681.2 | 140157.2 |
| 28654.5 | 38443.5 | 47966.6 | 58086.4 | 67300.2 | 85046.4 | 102985.1 | 141107.7 |
| 28667.1 | 38486.5 | 48016.0 | 58181.9 | 67375.0 | 85113.6 | 102994.0 | 143662.5 |
| 28705.6 | 38573.4 | 48028.3 | 59066.4 | 67428.0 | 85194.6 | 103235.5 | 143982.3 |
| 28711.0 | 38678.2 | 48092.2 | 59093.2 | 67515.1 | 85250.5 | 103290.4 | 144378.4 |
| 28722.2 | 38838.2 | 48162.8 | 59122.0 | 67524.4 | 85289.7 | 103388.9 | 144754.5 |
| 28734.6 | 38967.2 | 48342.9 | 59207.5 | 67607.2 | 85353.2 | 103410.3 | 144925.8 |
| 28790.0 | 38993.0 | 48575.4 | 59367.3 | 67612.2 | 85372.6 | 103438.6 | 146400.9 |
| 28797.8 | 38996.2 | 48920.6 | 59379.7 | 67644.6 | 85391.8 | 103495.3 | 147015.2 |
| 28838.1 | 39037.4 | 49150.3 | 59464.0 | 67809.8 | 85445.4 | 103593.4 | 147142.6 |
| 28863.5 | 39049.2 | 49179.6 | 59475.6 | 67841.2 | 85475.6 | 103677.6 | 147552.9 |
| 28888.1 | 39161.1 | 49193.4 | 59585.6 | 67856.3 | 85484.3 | 103704.0 | 147721.0 |
| 28961.6 | 39213.8 | 49207.8 | 59631.3 | 67884.6 | 85511.6 | 103734.5 | 147835.9 |
| 28978.6 | 39368.5 | 49300.1 | 59704.7 | 67907.9 | 85545.0 | 103766.6 | 149924.3 |
| 29092.4 | 39403.7 | 49355.7 | 59878.3 | 67924.1 | 85565.8 | 103932.4 | 150077.1 |
| 29116.6 | 39405.4 | 49381.3 | 59960.4 | 68150.9 | 85567.4 | 103989.6 | 150533.8 |
| 29172.7 | 39408.2 | 49464.2 | 60055.8 | 68174.7 | 85614.4 | 104088.8 | 150845.3 |
| 29266.3 | 39412.2 | 49552.8 | 60081.8 | 68292.3 | 85716.6 | 104143.0 | 150920.5 |
| 29270.1 | 39417.3 | 49563.8 | 60153.4 | 68338.4 | 85718.2 | 104149.3 | 150937.4 |
| 29305.3 | 39444.6 | 49605.0 | 60270.4 | 68445.9 | 85772.7 | 104299.7 | 150962.6 |
| 29369.0 | 39454.0 | 49649.1 | 60373.4 | 68488.1 | 85846.6 | 104328.0 | 153240.8 |
| 29379.8 | 39517.8 | 49654.5 | 60413.9 | 68625.4 | 86000.3 | 104355.7 | 154038.0 |
| 29457.9 | 39545.8 | 49677.5 | 60420.3 | 68859.5 | 86048.1 | 104399.6 | 154447.7 |
| 29484.4 | 39606.5 | 49840.8 | 60537.7 | 69064.3 | 86166.4 | 104649.5 | 154571.0 |
| 29521.3 | 39630.6 | 49945.6 | 60551.1 | 69242.5 | 86340.0 | 104655.3 | 154604.4 |
| 29528.6 | 39655.6 | 50041.3 | 60620.8 | 69387.0 | 86413.7 | 104656.7 | 177217.2 |
| 30148.8 | 39803.0 | 50072.5 | 60623.6 | 69390.6 | 86562.2 | 104698.1 | 177911.7 |
| 30354.8 | 39861.4 | 50225.1 | 60647.4 | 69700.2 | 86683.8 | 104705.6 | 179463.1 |
| 30576.6 | 39917.9 | 50245.6 | 60726.6 | 69808.4 | 86753.6 | 104773.7 | 181209.9 |
| 30685.9 | 39972.8 | 50286.5 | 60757.6 | 69844.3 | 86791.2 | 104855.8 | 182295.8 |
| 30722.6 | 39979.5 | 50356.8 | 60827.1 | 69886.0 | 86825.6 | 105045.8 | 182581.7 |
| 30749.3 | 40020.2 | 50388.0 | 60846.1 | 69960.2 | 87499.4 | 105103.3 | 182679.9 |
| 30774.1 | 40031.3 | 50400.7 | 60849.4 | 70105.2 | 87818.4 | 105126.6 | 182685.9 |
| 30785.1 | 40205.9 | 50416.6 | 60884.2 | 70157.6 | 89271.5 | 105130.9 | 183506.1 |
| 30868.5 | 40231.4 | 50440.5 | 60965.3 | 70194.2 | 89351.4 | 105150.8 | 185354.9 |
| 30892.2 | 40272.9 | 50465.4 | 60985.3 | 70390.8 | 89396.5 | 105186.4 | 185782.1 |
| 30932.6 | 40370.0 | 50467.8 | 61058.9 | 70421.3 | 89612.6 | 105273.8 | 187050.7 |
| 30987.2 |         |         |         |         |         |          |          |

**Table S19:** NEVPT2 computed the spin-orbit states for  $[\text{Dy}(\text{C}_5\text{H}_5)_2]^+$  complex. All the values are reported here in  $\text{cm}^{-1}$ .

Supporting Information

| Spin Orbit states |         |         |         |         |         |         |          |
|-------------------|---------|---------|---------|---------|---------|---------|----------|
| NEVPT2            |         |         |         |         |         |         |          |
| 0.0               | 31376.4 | 39937.8 | 49537.7 | 58797.8 | 66989.6 | 83404.7 | 98406.9  |
| 535.5             | 31440.7 | 40016.6 | 49766.7 | 58843.1 | 67024.9 | 83453.1 | 98512.6  |
| 859.2             | 31478.9 | 40031.1 | 50058.8 | 58925.2 | 67097.3 | 83629.0 | 98529.4  |
| 1082.2            | 31524.1 | 40070.6 | 50086.9 | 59080.6 | 67289.5 | 83719.8 | 98590.4  |
| 1290.5            | 31587.1 | 40089.9 | 50156.8 | 59107.2 | 67297.8 | 83819.3 | 98660.0  |
| 1482.7            | 31683.3 | 40102.5 | 50264.6 | 59111.3 | 67573.6 | 83845.1 | 98824.2  |
| 1621.5            | 31812.4 | 40154.2 | 50438.8 | 59140.3 | 67766.6 | 83867.7 | 98862.7  |
| 1764.3            | 31834.3 | 40185.3 | 50493.2 | 59218.1 | 67802.6 | 83885.4 | 98959.5  |
| 3383.3            | 31890.2 | 40220.8 | 50498.2 | 59254.6 | 68332.9 | 83909.9 | 98983.3  |
| 3560.9            | 31933.8 | 40278.0 | 50637.5 | 59279.7 | 68390.0 | 83914.4 | 99084.8  |
| 3945.5            | 31990.4 | 40342.8 | 50655.7 | 59326.7 | 68466.4 | 83961.3 | 99184.4  |
| 4244.9            | 32008.2 | 40357.3 | 50671.7 | 59433.0 | 68716.0 | 84044.3 | 99432.8  |
| 4416.3            | 32067.9 | 40377.7 | 50694.0 | 59458.6 | 68778.4 | 84102.1 | 99445.7  |
| 4517.4            | 32074.5 | 40415.5 | 50731.0 | 59511.5 | 68864.3 | 84268.1 | 99714.6  |
| 4572.2            | 32114.1 | 40419.4 | 50793.0 | 59596.6 | 69099.6 | 84312.4 | 99891.6  |
| 5744.2            | 32126.9 | 40467.5 | 50798.9 | 59633.6 | 69110.6 | 84460.1 | 99897.5  |
| 5875.9            | 32182.8 | 40557.5 | 50806.0 | 59677.8 | 69113.8 | 84535.2 | 100121.1 |
| 6177.7            | 32291.9 | 40582.4 | 51171.3 | 59784.3 | 69369.9 | 84568.9 | 100367.8 |
| 6479.1            | 32381.6 | 40611.2 | 52336.4 | 59791.5 | 69561.7 | 84601.3 | 100437.8 |
| 6615.5            | 32593.2 | 40809.7 | 52357.4 | 59801.0 | 69848.3 | 84610.1 | 100473.0 |
| 6655.9            | 32655.4 | 40987.2 | 52368.8 | 59848.3 | 70627.0 | 84675.4 | 100498.4 |
| 7574.2            | 32737.4 | 41011.2 | 52392.2 | 59869.0 | 70798.6 | 84734.2 | 100577.9 |
| 7683.0            | 32757.4 | 41116.5 | 52404.7 | 59921.2 | 71014.6 | 84781.1 | 100619.2 |
| 7947.9            | 32851.8 | 41160.0 | 52424.6 | 59963.1 | 71239.9 | 84807.8 | 100629.4 |
| 8246.5            | 32968.1 | 41185.4 | 52456.4 | 59982.6 | 71262.0 | 84892.0 | 100649.2 |
| 8291.0            | 32980.1 | 41220.1 | 52515.6 | 59997.7 | 71315.2 | 85171.1 | 100872.7 |
| 8934.8            | 33043.2 | 41256.1 | 52543.1 | 60034.6 | 71697.5 | 85217.6 | 100988.5 |
| 9021.9            | 33086.2 | 41272.4 | 52549.2 | 60129.9 | 71749.8 | 85301.2 | 101122.9 |
| 9046.3            | 33100.2 | 41316.4 | 52587.5 | 60139.5 | 71883.5 | 85341.9 | 101190.5 |
| 9096.9            | 33184.0 | 41323.4 | 52610.7 | 60198.7 | 71889.3 | 85473.3 | 101228.6 |
| 9143.7            | 33391.9 | 41400.2 | 52738.0 | 60220.8 | 71953.9 | 85623.8 | 101358.3 |
| 9207.7            | 33490.4 | 41419.3 | 52740.8 | 60255.0 | 72012.7 | 85654.9 | 101429.5 |
| 9314.5            | 33595.6 | 41525.6 | 52780.2 | 60257.4 | 72049.1 | 85692.5 | 101434.3 |
| 9483.3            | 33691.8 | 41898.4 | 52815.6 | 60295.2 | 72099.5 | 85892.5 | 101495.1 |
| 9520.6            | 33723.8 | 42117.4 | 52854.5 | 60329.3 | 72101.4 | 85974.9 | 101507.1 |
| 9590.5            | 33787.1 | 42353.5 | 52869.5 | 60338.3 | 72157.3 | 86413.9 | 101730.1 |
| 9937.2            | 33860.2 | 42650.4 | 52897.5 | 60346.5 | 72427.1 | 86715.8 | 102091.0 |
| 10412.4           | 33961.8 | 42905.9 | 52977.0 | 60413.6 | 72497.5 | 86850.3 | 102652.7 |
| 10498.4           | 34039.0 | 44054.8 | 52987.6 | 60486.1 | 72513.4 | 87195.7 | 103511.7 |
| 10636.5           | 34207.2 | 44080.7 | 53014.8 | 60510.3 | 72527.6 | 87772.4 | 103560.7 |
| 10651.9           | 34388.0 | 44089.3 | 53123.5 | 60562.7 | 72547.8 | 88316.2 | 103599.6 |
| 10658.4           | 34455.8 | 44138.5 | 53171.5 | 60580.5 | 72608.7 | 88660.6 | 103740.2 |
| 10738.5           | 34481.9 | 44166.6 | 53413.0 | 60730.2 | 72645.1 | 88727.5 | 104639.6 |
| 10763.1           | 34547.5 | 44189.8 | 53420.6 | 60749.8 | 72664.6 | 88867.5 | 104733.4 |
| 12207.8           | 34570.0 | 44257.1 | 53424.3 | 60759.2 | 72735.2 | 89127.3 | 104811.3 |
| 12262.9           | 34585.1 | 44281.3 | 53434.5 | 60774.6 | 73566.2 | 89138.9 | 105002.1 |
| 12312.7           | 34664.8 | 44317.7 | 53439.7 | 60905.5 | 73821.1 | 89386.2 | 105020.0 |
| 12328.2           | 34710.7 | 44335.8 | 53443.1 | 60966.3 | 74781.4 | 89531.7 | 105265.3 |
| 13483.3           | 34724.3 | 44443.7 | 53473.3 | 60981.1 | 74937.0 | 89591.3 | 105459.6 |
| 13512.4           | 34743.0 | 44512.4 | 53548.6 | 61016.2 | 74973.4 | 89672.9 | 105569.1 |
| 13535.4           | 34875.0 | 44550.6 | 53669.0 | 61039.6 | 75011.7 | 90216.7 | 105825.9 |
| 14265.5           | 35024.7 | 44631.7 | 53684.2 | 61066.5 | 75185.8 | 90281.9 | 106001.3 |
| 14274.5           | 35058.3 | 44661.9 | 53725.0 | 61126.2 | 75195.6 | 90545.5 | 106467.3 |
| 14778.8           | 35091.4 | 44919.7 | 53784.6 | 61169.1 | 75217.7 | 90683.2 | 106555.8 |
| 23611.9           | 35142.1 | 44946.7 | 54603.0 | 61214.7 | 75226.3 | 90822.3 | 106940.2 |
| 23847.1           | 35190.3 | 44992.9 | 54695.2 | 61253.5 | 75286.3 | 90833.4 | 107230.9 |
| 23881.7           | 35349.4 | 45276.6 | 54722.4 | 61409.5 | 75302.3 | 90988.7 | 108163.3 |
| 24144.8           | 35526.8 | 45541.6 | 54771.9 | 61611.8 | 75305.7 | 91086.6 | 108346.8 |
| 24310.2           | 35680.4 | 45620.9 | 54791.9 | 61647.9 | 75416.6 | 91503.2 | 108431.8 |
| 24683.2           | 35799.1 | 45644.9 | 54819.7 | 61704.7 | 75432.3 | 92107.9 | 108475.1 |
| 24817.6           | 35819.5 | 45700.3 | 54867.1 | 61778.7 | 75477.8 | 92191.7 | 108593.0 |
| 25159.6           | 35861.7 | 46203.6 | 54881.4 | 62091.7 | 75547.4 | 92568.1 | 110273.9 |
| 25420.1           | 36000.5 | 46267.7 | 54969.5 | 62153.4 | 75746.8 | 92824.8 | 111371.3 |
| 25529.7           | 36125.7 | 46382.1 | 55022.0 | 62195.5 | 75767.1 | 92857.3 | 115995.7 |
| 25609.0           | 36211.4 | 46499.7 | 55099.3 | 62285.6 | 75808.2 | 92930.9 | 116076.1 |
| 25622.7           | 36298.0 | 46524.5 | 55154.6 | 62289.9 | 75819.8 | 92999.3 | 116234.4 |
| 25638.3           | 36318.5 | 46544.1 | 55266.1 | 62410.6 | 75846.6 | 93035.4 | 116463.2 |
| 25770.5           | 36345.7 | 46560.2 | 55365.5 | 62447.4 | 75848.9 | 93237.1 | 116744.6 |
| 25797.9           | 36375.9 | 46637.6 | 55435.4 | 62468.1 | 75863.3 | 93318.0 | 116771.3 |
| 25858.0           | 36402.2 | 46657.0 | 55502.5 | 62494.6 | 75965.2 | 93340.7 | 116875.5 |
| 25977.8           | 36467.0 | 46678.3 | 55527.0 | 62531.5 | 75989.8 | 93422.9 | 117002.1 |
| 26120.0           | 36541.0 | 46689.3 | 55546.2 | 62604.5 | 76075.9 | 93448.7 | 117123.9 |
| 26251.7           | 36585.1 | 46707.7 | 55583.8 | 62676.7 | 76171.9 | 93506.5 | 117227.1 |
| 27679.9           | 36598.9 | 46735.2 | 55607.7 | 62743.7 | 76268.8 | 93607.9 | 117543.3 |
| 27714.6           | 36621.3 | 46802.0 | 55622.4 | 62817.4 | 76305.4 | 93619.4 | 117717.5 |



## Supporting Information

|         |         |         |         |         |         |         |          |
|---------|---------|---------|---------|---------|---------|---------|----------|
| 27732.1 | 36681.5 | 46815.3 | 55664.1 | 62920.3 | 76345.0 | 93715.8 | 117815.2 |
| 27822.1 | 36719.5 | 46835.1 | 55762.1 | 62976.9 | 76362.3 | 93923.0 | 117916.0 |
| 27842.6 | 36759.6 | 46861.7 | 55820.9 | 63016.2 | 76450.8 | 94225.5 | 118077.2 |
| 27874.1 | 36762.7 | 46910.9 | 55875.9 | 63270.6 | 77756.6 | 94321.0 | 118125.1 |
| 28006.4 | 36906.6 | 46938.9 | 55944.3 | 63286.4 | 78327.1 | 94340.4 | 118349.1 |
| 28152.6 | 37027.9 | 47046.4 | 56005.8 | 63366.7 | 78335.6 | 94394.2 | 118945.0 |
| 28182.3 | 37099.2 | 47060.6 | 56041.7 | 63417.5 | 78608.5 | 94580.7 | 119474.6 |
| 28202.7 | 37104.9 | 47096.7 | 56301.7 | 63522.8 | 78746.0 | 94638.6 | 119850.9 |
| 28316.1 | 37117.5 | 47178.7 | 56380.9 | 63600.8 | 78819.7 | 94817.6 | 123435.3 |
| 28352.1 | 37554.4 | 47216.6 | 56401.9 | 63705.1 | 78899.6 | 94832.8 | 123909.4 |
| 28417.4 | 37665.9 | 47258.6 | 56407.0 | 63880.3 | 78910.2 | 94880.9 | 125006.9 |
| 28436.5 | 37694.7 | 47387.7 | 56546.4 | 63886.8 | 78916.3 | 94919.6 | 126345.3 |
| 28712.7 | 37713.4 | 47446.6 | 56718.1 | 63908.0 | 79471.8 | 95004.3 | 126731.1 |
| 28833.3 | 37734.5 | 47485.9 | 56728.2 | 63911.4 | 79654.5 | 95199.2 | 127457.0 |
| 28859.2 | 37797.3 | 47529.0 | 56743.2 | 63915.8 | 79731.9 | 95206.6 | 128485.9 |
| 28980.8 | 37879.7 | 47555.5 | 56819.8 | 63975.9 | 79931.2 | 95301.3 | 131557.1 |
| 29091.1 | 37908.8 | 47571.7 | 56835.2 | 64077.5 | 80021.4 | 95514.1 | 131894.0 |
| 29196.3 | 37921.2 | 47600.7 | 56890.7 | 64091.1 | 80103.2 | 95549.6 | 132360.0 |
| 29249.5 | 37940.2 | 47610.5 | 56921.0 | 64271.4 | 80188.8 | 95564.9 | 132802.9 |
| 29310.2 | 37978.9 | 47615.5 | 56943.0 | 64305.6 | 80430.7 | 95584.1 | 132982.2 |
| 29366.2 | 38151.9 | 47637.2 | 56962.9 | 64384.3 | 80481.4 | 95631.2 | 133897.9 |
| 29440.2 | 38164.5 | 47646.6 | 56985.7 | 64416.9 | 80564.3 | 95708.9 | 134340.7 |
| 29520.3 | 38182.3 | 47677.8 | 57000.7 | 64434.2 | 80668.9 | 95837.0 | 134596.9 |
| 29541.2 | 38195.7 | 47717.9 | 57018.7 | 64530.1 | 80672.4 | 96351.2 | 135011.0 |
| 29614.2 | 38266.1 | 47737.7 | 57032.8 | 64539.9 | 80787.9 | 96449.2 | 135634.8 |
| 29651.8 | 38286.1 | 47780.2 | 57056.3 | 64640.7 | 80833.1 | 96469.9 | 135877.6 |
| 29673.8 | 38335.1 | 47810.9 | 57099.3 | 64677.6 | 80881.2 | 96483.5 | 136973.6 |
| 29692.3 | 38399.0 | 47822.2 | 57148.8 | 64741.0 | 80908.8 | 96537.4 | 137125.4 |
| 29721.7 | 38403.0 | 47836.3 | 57172.0 | 64747.1 | 80974.3 | 96680.8 | 137867.0 |
| 29733.7 | 38414.1 | 47868.2 | 57239.3 | 64968.4 | 81008.5 | 96790.9 | 138243.6 |
| 29791.1 | 38486.1 | 47884.6 | 57316.3 | 64999.1 | 81102.6 | 96874.5 | 138292.4 |
| 29838.0 | 38555.3 | 47912.3 | 57319.9 | 65023.7 | 81318.1 | 96894.3 | 138323.9 |
| 30020.8 | 38587.2 | 47932.1 | 57435.5 | 65077.6 | 81370.0 | 96933.7 | 138348.8 |
| 30127.3 | 38651.2 | 48009.2 | 57496.4 | 65191.6 | 81491.8 | 96978.9 | 140495.2 |
| 30257.7 | 38675.6 | 48141.9 | 57506.1 | 65283.7 | 81625.9 | 97013.3 | 141420.0 |
| 30306.8 | 38697.2 | 48178.5 | 57672.6 | 65289.5 | 81795.6 | 97082.7 | 141881.3 |
| 30457.2 | 38711.4 | 48305.2 | 57928.0 | 65354.7 | 81832.5 | 97126.9 | 141980.7 |
| 30490.1 | 38799.3 | 48404.1 | 58123.7 | 65403.6 | 81875.6 | 97170.1 | 142020.6 |
| 30670.6 | 38910.6 | 48417.7 | 58222.0 | 65464.9 | 81925.2 | 97224.4 | 160314.8 |
| 30724.3 | 38967.9 | 48426.6 | 58273.4 | 65667.0 | 82070.2 | 97239.8 | 160896.3 |
| 30826.5 | 39065.7 | 48544.2 | 58315.1 | 65728.2 | 82231.6 | 97266.8 | 162213.4 |
| 30860.1 | 39117.6 | 48659.7 | 58388.1 | 65777.6 | 82245.8 | 97353.3 | 164193.8 |
| 30944.6 | 39209.8 | 48683.8 | 58498.8 | 65841.4 | 82426.9 | 97414.6 | 164991.6 |
| 31001.2 | 39220.2 | 48730.3 | 58641.9 | 65961.7 | 82439.7 | 97464.6 | 165095.9 |
| 31056.5 | 39293.8 | 48859.0 | 58661.9 | 66046.0 | 82586.7 | 97550.3 | 165196.2 |
| 31084.1 | 39839.1 | 48895.2 | 58668.1 | 66081.3 | 82707.8 | 97571.1 | 165417.1 |
| 31093.3 | 39855.9 | 49079.8 | 58679.7 | 66118.9 | 82794.4 | 97581.2 | 166611.0 |
| 31118.2 | 39873.7 | 49261.4 | 58698.9 | 66233.3 | 82825.1 | 97637.0 | 167740.9 |
| 31159.3 | 39879.9 | 49317.8 | 58717.5 | 66393.9 | 82989.4 | 97965.1 | 168328.8 |
| 31198.5 | 39906.5 | 49390.1 | 58743.7 | 66434.1 | 83199.0 | 98180.6 | 170136.1 |
| 31267.5 |         |         |         |         |         |         |          |

**Table S20:** CASSCF computed 21 roots of sextet (red) along with 224 roots of quartet and 490 roots of doublet states for  $[\text{Dy}(\text{C}_6\text{H}_6)_2]^{3+}$  complex. All the values are reported herein  $\text{cm}^{-1}$ .

| 3                |         |         |         |         |          |
|------------------|---------|---------|---------|---------|----------|
| Spin free States |         |         |         |         |          |
| CASSCF           |         |         |         |         |          |
| 0.0              | 37063.8 | 47289.6 | 57489.1 | 79741.4 | 98302.5  |
| 626.1            | 37063.8 | 47319.0 | 57528.0 | 79745.9 | 98311.8  |
| 629.3            | 37096.0 | 47351.7 | 57537.4 | 79780.1 | 98365.5  |
| 654.2            | 37096.2 | 47439.8 | 57653.4 | 79805.7 | 98365.5  |
| 655.1            | 37101.1 | 47442.3 | 57688.4 | 79835.8 | 98451.0  |
| 832.1            | 37102.9 | 47672.4 | 57688.8 | 79940.3 | 98451.0  |
| 848.5            | 37200.3 | 47673.3 | 57716.2 | 79960.7 | 99018.3  |
| 1111.4           | 37203.5 | 47753.6 | 57717.9 | 79980.9 | 99019.6  |
| 1137.2           | 37220.0 | 47754.1 | 58863.5 | 80006.8 | 100902.3 |
| 1235.2           | 37220.1 | 47800.1 | 58866.9 | 80012.4 | 100902.4 |
| 7872.0           | 37383.3 | 47805.6 | 58903.5 | 80042.3 | 101013.4 |
| 7911.0           | 37423.6 | 47828.5 | 58936.9 | 80043.4 | 101013.4 |
| 8017.4           | 37463.3 | 47849.8 | 58983.6 | 80111.7 | 101205.9 |
| 8024.1           | 37464.2 | 47855.4 | 59109.5 | 80111.8 | 101206.0 |
| 8053.1           | 37542.6 | 47901.5 | 59112.0 | 80226.7 | 101335.9 |

Supporting Information

|         |         |         |         |         |          |
|---------|---------|---------|---------|---------|----------|
| 8178.7  | 37582.3 | 47902.6 | 59389.4 | 80226.8 | 101336.7 |
| 8180.7  | 37703.9 | 47925.0 | 59492.6 | 80331.1 | 101338.7 |
| 33992.8 | 37743.3 | 47925.0 | 59492.7 | 80331.1 | 101344.6 |
| 35100.1 | 37890.4 | 47985.2 | 59583.5 | 80403.6 | 101352.9 |
| 35190.2 | 37893.9 | 47985.3 | 59599.5 | 80403.6 | 101363.6 |
| 24497.9 | 37942.3 | 48121.1 | 59599.6 | 80526.6 | 101365.8 |
| 24497.9 | 37942.5 | 48121.1 | 59641.2 | 80526.6 | 102629.8 |
| 24713.9 | 38511.7 | 48314.1 | 60041.4 | 80735.8 | 102673.6 |
| 24713.9 | 38511.7 | 48314.1 | 60048.6 | 80735.8 | 102705.7 |
| 24815.0 | 38541.0 | 48546.4 | 60362.9 | 84457.7 | 102795.2 |
| 24848.1 | 38541.0 | 48546.4 | 60363.6 | 84728.8 | 102800.9 |
| 24858.1 | 38697.7 | 48799.0 | 60396.6 | 84788.9 | 102875.3 |
| 24866.6 | 38710.5 | 48799.0 | 60438.5 | 85616.9 | 102876.8 |
| 24869.3 | 38711.6 | 49066.0 | 60443.5 | 85618.0 | 102921.0 |
| 24876.5 | 38727.9 | 49066.0 | 60560.4 | 85777.3 | 102921.1 |
| 24899.3 | 38739.4 | 49181.5 | 60564.1 | 85779.3 | 103236.9 |
| 24920.4 | 38795.8 | 49181.5 | 61698.8 | 85883.8 | 103236.9 |
| 24922.2 | 38802.8 | 51472.0 | 61699.0 | 85893.3 | 105121.7 |
| 25077.2 | 38821.2 | 51496.5 | 61732.3 | 86008.6 | 105259.7 |
| 25080.3 | 38821.4 | 51503.2 | 61747.3 | 86028.7 | 105310.3 |
| 25105.8 | 38834.9 | 51503.9 | 61757.1 | 86030.2 | 105528.2 |
| 25168.8 | 38835.9 | 51516.7 | 61814.5 | 86073.8 | 105535.8 |
| 25170.5 | 41674.9 | 51564.9 | 61815.8 | 86076.4 | 105788.2 |
| 25183.9 | 41780.7 | 51574.9 | 61952.8 | 86909.1 | 105789.0 |
| 25194.3 | 41780.8 | 51590.2 | 61952.9 | 86911.6 | 105962.1 |
| 25266.5 | 41799.1 | 51591.3 | 62162.0 | 86941.7 | 105962.1 |
| 25299.8 | 41800.6 | 51631.3 | 62162.1 | 86973.3 | 106428.6 |
| 25302.3 | 41822.7 | 51632.6 | 62420.5 | 87000.7 | 106480.2 |
| 25310.6 | 41834.5 | 51710.7 | 62420.5 | 87088.5 | 106510.1 |
| 25314.8 | 41845.1 | 51710.7 | 62559.1 | 87089.4 | 106576.3 |
| 25316.1 | 41851.7 | 52106.0 | 62559.1 | 87465.1 | 106602.1 |
| 25317.0 | 41856.1 | 52152.6 | 63881.3 | 87466.5 | 107156.5 |
| 25319.0 | 41930.4 | 52162.1 | 63882.9 | 87466.7 | 107157.5 |
| 25319.3 | 41930.4 | 52261.8 | 63945.4 | 87470.3 | 107575.4 |
| 25367.0 | 42061.3 | 52262.8 | 63956.6 | 87499.6 | 107575.5 |
| 25367.5 | 42061.3 | 52352.4 | 63981.8 | 87516.8 | 110114.5 |
| 25377.9 | 42137.1 | 52354.3 | 63985.0 | 87537.5 | 110115.0 |
| 25379.1 | 42167.6 | 52370.8 | 64085.1 | 87622.6 | 110573.2 |
| 25389.0 | 42206.5 | 52370.8 | 66715.5 | 87625.1 | 110576.4 |
| 25389.1 | 42206.5 | 52385.8 | 66805.0 | 87954.7 | 110702.5 |
| 25416.9 | 42322.3 | 52386.0 | 67331.4 | 87954.9 | 110734.4 |
| 25416.9 | 42322.3 | 52416.4 | 67374.7 | 87996.3 | 110869.5 |
| 25767.3 | 42407.6 | 52416.6 | 67399.5 | 87996.3 | 114284.4 |
| 25767.3 | 42407.6 | 52657.7 | 67508.4 | 88247.4 | 115136.4 |
| 26022.5 | 42552.4 | 52657.7 | 67511.2 | 88247.4 | 115222.6 |
| 26022.6 | 42553.5 | 54685.0 | 67652.1 | 88422.1 | 119866.5 |
| 26368.9 | 42739.4 | 54882.2 | 67652.3 | 88422.2 | 119885.9 |
| 26370.1 | 42739.4 | 54891.0 | 67830.3 | 88568.8 | 119937.7 |
| 26376.2 | 42831.6 | 54929.5 | 67830.4 | 88568.8 | 120027.7 |
| 26377.7 | 42838.7 | 54932.3 | 67883.8 | 93484.6 | 120034.5 |
| 26545.9 | 42942.5 | 55163.4 | 68152.3 | 93485.0 | 120201.4 |
| 26551.1 | 42977.2 | 55166.9 | 68152.3 | 93564.7 | 120202.0 |
| 26559.3 | 42979.4 | 55206.2 | 69474.7 | 93568.4 | 120395.7 |
| 29329.7 | 43052.5 | 55206.8 | 69474.7 | 93665.1 | 120395.8 |
| 29329.7 | 43092.5 | 55556.1 | 69487.2 | 93717.6 | 120603.5 |
| 29504.3 | 43092.8 | 55561.7 | 69487.3 | 93718.2 | 120603.6 |
| 29504.7 | 43106.8 | 55572.2 | 69494.9 | 95244.6 | 120873.2 |
| 29518.1 | 43116.9 | 55576.6 | 69496.8 | 95244.6 | 120873.2 |
| 29520.6 | 43117.2 | 55584.8 | 69569.2 | 95436.2 | 121394.4 |
| 29553.0 | 43144.2 | 55656.7 | 69574.0 | 95436.3 | 121394.4 |
| 29553.2 | 43147.9 | 55657.0 | 69582.0 | 95476.2 | 122569.4 |
| 29608.1 | 43220.3 | 55754.4 | 69582.0 | 95476.8 | 122572.1 |
| 29608.1 | 43224.6 | 55754.4 | 69652.0 | 95531.6 | 123277.0 |
| 29653.6 | 43248.0 | 55814.2 | 69652.0 | 95535.1 | 123329.0 |
| 29656.1 | 43248.2 | 55814.2 | 69660.1 | 95622.4 | 123466.8 |
| 29770.1 | 43282.6 | 55895.8 | 69668.2 | 95640.6 | 131914.5 |
| 29773.7 | 43286.2 | 55895.8 | 69700.6 | 95687.6 | 132120.6 |
| 29807.9 | 43298.0 | 55991.5 | 70820.4 | 96105.9 | 132193.8 |
| 30996.1 | 43307.3 | 55991.5 | 70959.7 | 96106.1 | 132532.6 |
| 31008.8 | 43350.4 | 56148.1 | 71000.6 | 96214.7 | 132539.3 |
| 31019.5 | 43350.4 | 56148.1 | 72229.4 | 96219.5 | 133317.3 |
| 31025.1 | 43417.5 | 56176.1 | 72232.1 | 96231.2 | 133318.2 |
| 31025.1 | 43433.6 | 56289.5 | 73083.6 | 96243.5 | 139762.9 |
| 31060.4 | 43446.4 | 56300.6 | 73090.5 | 96287.6 | 139762.9 |
| 31064.1 | 43446.4 | 56326.9 | 73191.4 | 96340.8 | 140061.6 |
| 31078.1 | 43568.9 | 56327.6 | 73217.1 | 96370.0 | 140062.7 |
| 31078.1 | 43568.9 | 56363.4 | 73267.7 | 96379.4 | 140522.6 |

## Supporting Information

|         |         |         |         |         |          |
|---------|---------|---------|---------|---------|----------|
| 31116.5 | 43639.5 | 56363.8 | 73270.7 | 96380.7 | 140529.0 |
| 31117.0 | 43643.2 | 56382.5 | 73274.0 | 96493.6 | 140642.7 |
| 31137.5 | 44577.3 | 56383.7 | 73289.8 | 96494.7 | 140664.7 |
| 31137.5 | 44600.5 | 56441.2 | 76647.4 | 96582.7 | 140693.2 |
| 31152.0 | 44638.1 | 56441.2 | 76650.4 | 96582.7 | 142409.1 |
| 31152.0 | 44729.1 | 56504.7 | 76654.7 | 96816.7 | 142484.5 |
| 31162.3 | 44736.5 | 56516.1 | 76655.5 | 96839.9 | 143307.0 |
| 31162.3 | 44810.3 | 56524.3 | 76660.3 | 96839.9 | 146052.9 |
| 32834.1 | 44812.8 | 56544.9 | 76705.6 | 96848.3 | 146052.9 |
| 32836.8 | 44813.2 | 56544.9 | 76705.7 | 96870.9 | 146433.6 |
| 32852.7 | 44814.0 | 56563.3 | 76733.5 | 96877.8 | 146433.7 |
| 32860.6 | 44855.1 | 56563.4 | 76877.9 | 96886.4 | 146648.2 |
| 32928.1 | 44856.6 | 56625.8 | 76878.0 | 96886.4 | 146648.7 |
| 34196.5 | 44902.6 | 56628.6 | 76907.6 | 96888.0 | 146708.6 |
| 34196.5 | 44918.7 | 56650.9 | 76907.6 | 96971.2 | 146717.8 |
| 34301.5 | 44939.0 | 56651.3 | 77933.7 | 97045.4 | 146757.9 |
| 34301.5 | 44939.0 | 56693.1 | 77937.8 | 97094.3 | 146764.6 |
| 34362.7 | 44972.3 | 56693.9 | 78320.0 | 97223.8 | 146784.6 |
| 34422.6 | 44972.5 | 56800.7 | 78323.3 | 97228.2 | 174362.9 |
| 34440.8 | 44973.7 | 56806.7 | 78651.5 | 97339.0 | 174544.9 |
| 34449.7 | 44973.8 | 56836.5 | 78750.6 | 97340.0 | 174676.9 |
| 34451.5 | 44984.4 | 56839.8 | 78787.9 | 97480.3 | 175575.2 |
| 34524.0 | 45101.9 | 56849.8 | 79429.6 | 97480.4 | 175583.6 |
| 34528.5 | 45101.9 | 56885.6 | 79429.6 | 97693.3 | 177920.3 |
| 36815.0 | 45435.4 | 56928.8 | 79587.0 | 97693.3 | 177971.6 |
| 36815.0 | 45435.4 | 57005.2 | 79587.0 | 97759.5 | 178041.7 |
| 36923.6 | 45535.1 | 57005.2 | 79678.8 | 97835.9 | 178083.1 |
| 36923.7 | 45550.4 | 57189.0 | 79679.0 | 97912.3 | 178085.9 |
| 36989.3 | 46005.5 | 57189.5 | 79715.8 | 98010.6 | 178712.8 |
| 37014.3 | 46061.7 | 57488.3 | 79717.2 | 98010.6 | 178730.4 |
| 37020.6 | 46207.3 |         |         |         |          |

**Table S21:** NEVPT2 computed 21 roots of sextet (red) along with 224 roots of quartet and 490 roots of doublet states for  $[\text{Dy}(\text{C}_6\text{H}_6)_2]^{3+}$  complex. All the values are reported herein  $\text{cm}^{-1}$ .

| 3                |         |         |         |         |         |         |          |
|------------------|---------|---------|---------|---------|---------|---------|----------|
| Spin free States |         |         |         |         |         |         |          |
| NEVPT2           |         |         |         |         |         |         |          |
| 0.2              | 31900.4 | 42860.9 | 50328.0 | 55351.7 | 67352.7 | 82610.7 | 95074.2  |
| 593.8            | 31905.1 | 42868.8 | 50396.0 | 55351.8 | 67484.2 | 82610.7 | 95074.7  |
| 616.4            | 31905.1 | 42897.1 | 50396.4 | 55416.2 | 67485.3 | 85489.4 | 95276.5  |
| 709.9            | 31918.7 | 42928.6 | 50530.7 | 55416.3 | 69401.9 | 85492.5 | 95285.4  |
| 715.8            | 31918.7 | 42967.5 | 50530.8 | 55512.6 | 70443.5 | 85541.9 | 95470.6  |
| 810.8            | 31956.9 | 42998.9 | 50741.7 | 55512.7 | 70446.4 | 85547.4 | 95470.6  |
| 846.4            | 31960.7 | 43005.6 | 50741.7 | 55687.2 | 70446.4 | 85597.3 | 95540.2  |
| 1167.9           | 31973.1 | 43005.6 | 50999.7 | 55687.3 | 70446.8 | 85706.4 | 95549.5  |
| 1190.7           | 31973.1 | 43023.4 | 50999.7 | 55687.3 | 70448.0 | 85707.3 | 95705.4  |
| 1299.7           | 31998.0 | 43077.9 | 51166.8 | 55895.2 | 70517.3 | 87857.9 | 95705.7  |
| 6627.0           | 31998.1 | 43082.2 | 51223.8 | 55901.9 | 70519.2 | 87857.9 | 97124.2  |
| 6673.5           | 32008.3 | 43082.4 | 51233.0 | 55923.3 | 70615.7 | 88100.5 | 97208.3  |
| 6799.1           | 32008.4 | 43087.2 | 51281.9 | 55961.2 | 70635.3 | 88100.8 | 97215.1  |
| 6816.2           | 32926.7 | 43129.1 | 51281.9 | 55980.8 | 70736.9 | 88194.2 | 97217.5  |
| 6876.9           | 32926.8 | 43214.3 | 51359.5 | 55997.5 | 70736.9 | 88196.3 | 97273.9  |
| 6982.7           | 33073.7 | 43220.4 | 51359.7 | 56057.0 | 70762.2 | 88259.2 | 97885.4  |
| 6992.4           | 33074.0 | 43327.0 | 51438.1 | 56172.8 | 70762.3 | 88267.0 | 97893.6  |
| 28712.1          | 33125.7 | 43327.5 | 51438.5 | 56186.1 | 71022.6 | 88272.9 | 98297.6  |
| 29860.3          | 33210.1 | 43431.3 | 51462.2 | 56555.9 | 71029.6 | 88317.4 | 98297.8  |
| 29955.4          | 33232.5 | 43431.3 | 51465.2 | 56556.1 | 71413.3 | 88350.7 | 100899.2 |
| 24143.7          | 33243.8 | 43786.4 | 51467.2 | 56559.9 | 71562.0 | 88359.4 | 100902.8 |
| 24148.2          | 33254.7 | 43786.5 | 51471.9 | 56570.0 | 71598.6 | 88372.5 | 101409.5 |
| 24148.2          | 33339.1 | 43801.4 | 51526.3 | 56745.2 | 75174.9 | 88506.1 | 101413.9 |
| 24220.7          | 33347.5 | 43803.5 | 51527.6 | 56745.3 | 75186.0 | 88508.8 | 101539.5 |
| 24316.8          | 34027.9 | 43803.6 | 51594.8 | 57203.5 | 75186.0 | 88561.0 | 101571.8 |
| 24316.9          | 34094.3 | 43811.0 | 51594.8 | 57207.3 | 75351.7 | 88694.6 | 101748.0 |
| 24437.9          | 34375.6 | 43829.4 | 51693.2 | 57215.8 | 75351.7 | 88699.2 | 104358.1 |
| 24451.4          | 34936.6 | 43845.4 | 51693.2 | 57235.7 | 75371.1 | 88883.0 | 105231.1 |
| 24462.4          | 34939.6 | 43855.0 | 51773.0 | 57242.1 | 75371.4 | 88896.3 | 105322.8 |
| 24462.9          | 35054.5 | 43862.7 | 51773.0 | 57250.3 | 75393.2 | 88997.2 | 110993.8 |
| 24595.4          | 35081.1 | 43873.7 | 52021.1 | 57255.7 | 75396.5 | 89101.9 | 111019.6 |
| 24613.2          | 35264.9 | 43934.9 | 52221.3 | 58218.2 | 75464.9 | 89167.3 | 111068.0 |
| 24622.6          | 35469.4 | 43934.9 | 52221.7 | 58219.8 | 75483.7 | 89336.8 | 111159.3 |
| 24710.3          | 35487.1 | 44088.5 | 52244.3 | 58250.8 | 75521.1 | 89350.4 | 111165.7 |
| 24715.2          | 35534.3 | 44089.0 | 52255.0 | 58259.1 | 75526.4 | 89615.5 | 111335.1 |
| 24722.8          | 35535.2 | 44246.8 | 52282.5 | 58273.1 | 75537.6 | 89623.9 | 111338.2 |
| 24762.1          | 37452.4 | 44246.9 | 52296.2 | 58317.1 | 75558.0 | 90211.7 | 111523.5 |
| 24764.9          | 37452.5 | 44355.3 | 52535.5 | 58322.1 | 75644.2 | 90227.1 | 111525.9 |

## Supporting Information

|         |         |         |         |         |         |         |          |
|---------|---------|---------|---------|---------|---------|---------|----------|
| 24765.2 | 37566.7 | 44355.3 | 52540.5 | 58465.7 | 76387.6 | 90261.1 | 111526.6 |
| 24765.2 | 37567.0 | 44359.7 | 52668.9 | 58466.4 | 76389.0 | 90310.6 | 111527.5 |
| 24832.0 | 37629.9 | 44359.7 | 52701.2 | 58697.2 | 76852.3 | 90313.4 | 111718.2 |
| 24835.0 | 37654.4 | 44600.4 | 52702.4 | 58697.2 | 76964.7 | 90319.9 | 111718.2 |
| 24967.6 | 37660.6 | 44601.6 | 52796.0 | 58984.7 | 76975.3 | 90453.3 | 111983.6 |
| 24979.7 | 37765.0 | 44629.2 | 52805.4 | 58984.7 | 76996.5 | 90453.8 | 111983.6 |
| 24983.3 | 37766.6 | 44630.9 | 52831.1 | 59082.2 | 77003.6 | 90521.2 | 112293.5 |
| 25098.4 | 37767.5 | 44671.5 | 52832.7 | 59082.2 | 77105.2 | 90551.3 | 112348.0 |
| 25131.8 | 37768.7 | 44691.3 | 52964.0 | 59347.8 | 77106.7 | 90593.7 | 112490.9 |
| 25164.7 | 37798.2 | 44766.9 | 53015.2 | 59356.4 | 77205.3 | 90774.5 | 112603.7 |
| 25236.4 | 37798.2 | 44775.7 | 53019.9 | 59374.2 | 77205.4 | 90799.5 | 112603.7 |
| 25299.0 | 37908.0 | 44779.8 | 53038.4 | 59385.5 | 77289.2 | 90799.6 | 119214.5 |
| 25328.1 | 37924.9 | 44805.7 | 53238.4 | 59455.1 | 77289.2 | 90945.8 | 119471.7 |
| 25614.7 | 37946.6 | 44805.8 | 53239.0 | 59459.5 | 77402.8 | 90958.3 | 119548.7 |
| 26011.7 | 37947.4 | 44812.4 | 53319.2 | 59560.4 | 77402.9 | 91018.5 | 119838.8 |
| 26083.9 | 38086.3 | 44813.2 | 53380.3 | 60672.4 | 77497.5 | 91022.4 | 119848.3 |
| 26269.4 | 38086.5 | 44822.6 | 53383.1 | 60769.6 | 77497.5 | 91064.5 | 120696.1 |
| 26481.4 | 38136.7 | 44837.0 | 53545.7 | 61906.0 | 77607.9 | 91064.7 | 120701.9 |
| 26518.0 | 38136.7 | 44839.8 | 53560.0 | 63511.4 | 77607.9 | 91169.7 | 127973.3 |
| 26763.1 | 38221.5 | 44849.5 | 53789.8 | 63567.7 | 77854.4 | 91178.2 | 127973.4 |
| 26809.0 | 38284.4 | 44856.2 | 53840.2 | 63590.7 | 77854.4 | 91304.5 | 128252.2 |
| 26965.4 | 38285.2 | 44961.6 | 53840.2 | 63708.5 | 79313.0 | 91304.8 | 128258.1 |
| 26992.6 | 38329.4 | 44963.4 | 53922.5 | 63713.6 | 79313.0 | 91535.3 | 128796.2 |
| 27166.3 | 38339.9 | 45020.9 | 53931.1 | 63852.4 | 79469.5 | 91535.3 | 128805.4 |
| 27247.1 | 38375.7 | 45020.9 | 53966.7 | 63853.2 | 79488.7 | 91937.0 | 128919.0 |
| 27247.6 | 38386.9 | 45071.3 | 53966.7 | 64019.8 | 79654.5 | 91937.0 | 128924.7 |
| 27376.2 | 38425.8 | 45071.3 | 53988.3 | 64019.9 | 79679.0 | 92263.7 | 128977.4 |
| 27376.2 | 38433.6 | 45213.5 | 53988.5 | 64376.5 | 79683.3 | 92263.7 | 129361.5 |
| 27802.9 | 38437.5 | 45219.1 | 53990.8 | 64376.5 | 79733.7 | 92353.4 | 129447.0 |
| 27803.0 | 38438.5 | 45240.7 | 53994.3 | 65580.0 | 79749.7 | 92353.4 | 130365.6 |
| 29487.6 | 38705.7 | 45240.7 | 54007.5 | 65583.8 | 80250.1 | 93601.8 | 133502.8 |
| 29487.7 | 39183.5 | 45460.8 | 54010.9 | 65839.4 | 80254.9 | 93601.8 | 133502.9 |
| 29655.0 | 39215.1 | 45461.1 | 54013.2 | 65921.3 | 80267.5 | 93708.8 | 133976.0 |
| 29657.2 | 39795.1 | 49840.1 | 54045.0 | 65971.0 | 80302.2 | 93708.8 | 133976.3 |
| 29659.4 | 39801.7 | 49875.2 | 54045.1 | 66365.9 | 80329.1 | 93949.3 | 134231.7 |
| 29668.6 | 40089.1 | 49876.4 | 54060.8 | 66366.0 | 80374.8 | 93949.3 | 134232.8 |
| 29751.1 | 40100.3 | 49878.8 | 54066.7 | 66370.4 | 80387.0 | 94054.5 | 134278.5 |
| 29751.6 | 40199.7 | 49905.1 | 54213.8 | 66371.1 | 80749.4 | 94063.0 | 134296.2 |
| 29816.6 | 40239.5 | 49961.5 | 54220.7 | 66372.1 | 80750.3 | 94077.2 | 134336.1 |
| 29824.2 | 40443.1 | 49981.9 | 54248.9 | 66380.9 | 81259.7 | 94099.9 | 134344.3 |
| 29854.9 | 40489.9 | 49997.8 | 54249.1 | 66465.9 | 81271.4 | 94104.8 | 134370.5 |
| 29855.0 | 40578.8 | 49998.1 | 54314.1 | 66476.4 | 81273.5 | 94109.5 | 157899.8 |
| 29957.9 | 40924.7 | 50044.3 | 54320.3 | 66508.8 | 81273.6 | 94112.2 | 158072.2 |
| 29962.2 | 41022.2 | 50051.7 | 54756.4 | 66509.0 | 81280.8 | 94739.8 | 158219.0 |
| 30004.0 | 41053.7 | 50114.2 | 54756.5 | 66582.5 | 81341.0 | 94766.3 | 158905.0 |
| 30173.4 | 41218.0 | 50114.2 | 54991.5 | 66593.8 | 81371.8 | 94827.4 | 158917.1 |
| 30175.6 | 41240.9 | 50213.5 | 55006.5 | 66596.9 | 81372.1 | 94860.4 | 160618.4 |
| 30205.7 | 42161.9 | 50214.3 | 55006.6 | 66611.5 | 81377.9 | 94957.3 | 160687.8 |
| 30220.6 | 42190.9 | 50250.6 | 55006.8 | 66611.7 | 81431.8 | 94967.4 | 160697.0 |
| 30282.7 | 42616.8 | 50255.5 | 55007.9 | 66621.0 | 81431.9 | 94974.9 | 160740.0 |
| 31813.6 | 42675.8 | 50283.3 | 55028.2 | 66635.5 | 81781.4 | 95010.4 | 160810.1 |
| 31830.5 | 42820.4 | 50292.2 | 55032.2 | 66674.4 | 81782.3 | 95044.8 | 161816.8 |
| 31843.8 | 42825.2 | 50301.7 | 55032.7 | 67242.2 | 82382.4 | 95051.6 | 161847.6 |
| 31892.6 | 42832.0 | 50324.2 | 55038.3 | 67253.4 | 82382.5 |         |          |

**Table S22:** CASSCF computed the spin-orbit states for  $[\text{Dy}(\text{C}_6\text{H}_6)_2]^{3+}$  complex. All the values are reported here in  $\text{cm}^{-1}$ .

| 3                 |         |         |         |         |         |         |          |
|-------------------|---------|---------|---------|---------|---------|---------|----------|
| Spin Orbit States |         |         |         |         |         |         |          |
| CASSCF            |         |         |         |         |         |         |          |
| 0.0               | 30728.4 | 40309.3 | 50329.5 | 61017.2 | 70471.4 | 89759.6 | 105156.4 |
| 388.8             | 30743.9 | 40481.9 | 50481.5 | 61018.7 | 70603.8 | 90147.6 | 105394.6 |
| 557.8             | 31649.7 | 40497.1 | 50501.8 | 61039.4 | 70672.6 | 90152.2 | 105424.3 |
| 661.9             | 31841.3 | 40554.1 | 50509.2 | 61073.7 | 70911.3 | 90189.9 | 105625.8 |
| 779.0             | 31966.5 | 40555.9 | 50515.7 | 61174.8 | 71405.6 | 90226.5 | 105710.8 |
| 912.5             | 31983.1 | 40581.4 | 50553.8 | 61320.6 | 71595.3 | 90249.6 | 105917.3 |
| 1034.8            | 32008.1 | 40600.2 | 50557.7 | 61340.7 | 72152.3 | 90440.4 | 106159.6 |
| 1117.9            | 32011.1 | 40653.3 | 50597.4 | 61407.2 | 72200.6 | 90470.7 | 106228.7 |
| 3263.4            | 32014.2 | 40667.0 | 50640.7 | 61487.2 | 72286.9 | 90538.5 | 106439.4 |
| 3356.8            | 32018.9 | 40691.0 | 50777.1 | 61488.6 | 72437.3 | 90620.1 | 106458.0 |
| 3618.8            | 32031.7 | 40692.8 | 50797.6 | 61546.1 | 72646.2 | 90754.8 | 106528.4 |
| 3816.8            | 32042.9 | 40712.3 | 50902.6 | 61565.5 | 72880.7 | 90772.8 | 106561.0 |
| 3914.8            | 32108.1 | 40748.9 | 50915.3 | 61608.6 | 73092.2 | 90958.3 | 106670.5 |
| 3954.1            | 32130.6 | 40764.3 | 50939.0 | 61760.7 | 74393.9 | 91188.3 | 107557.4 |

Supporting Information

|         |         |         |         |         |         |          |          |
|---------|---------|---------|---------|---------|---------|----------|----------|
| 3999.2  | 32139.1 | 40779.0 | 51009.5 | 61770.8 | 74559.3 | 91262.6  | 107595.2 |
| 5575.1  | 32159.5 | 40796.7 | 51027.6 | 61773.8 | 74696.5 | 91284.7  | 107702.2 |
| 5637.1  | 32297.9 | 40967.3 | 51044.7 | 61847.8 | 74775.9 | 91333.0  | 107777.6 |
| 5894.7  | 32403.7 | 41058.3 | 51103.6 | 61851.6 | 74817.4 | 91354.1  | 107779.9 |
| 6074.0  | 32485.1 | 42024.5 | 51157.1 | 61945.8 | 74909.1 | 91382.0  | 107804.7 |
| 6115.7  | 32605.4 | 42097.0 | 51162.7 | 61983.8 | 74918.3 | 91427.4  | 107814.8 |
| 6157.0  | 32837.4 | 42135.0 | 51187.8 | 62003.8 | 74943.8 | 91464.9  | 109394.9 |
| 7360.4  | 32844.0 | 42162.0 | 51221.3 | 62034.2 | 74944.4 | 91471.2  | 109549.9 |
| 7427.9  | 32907.2 | 42260.7 | 51269.8 | 62046.2 | 74985.1 | 91544.3  | 109723.8 |
| 7682.6  | 33052.8 | 42662.4 | 51282.9 | 62059.1 | 75016.8 | 91691.3  | 109787.2 |
| 7786.2  | 33238.3 | 42784.3 | 51295.6 | 62199.4 | 75044.2 | 91693.0  | 109803.1 |
| 7845.9  | 33694.1 | 42842.9 | 51334.8 | 62228.3 | 75054.4 | 91802.4  | 109857.1 |
| 8709.7  | 33790.2 | 42916.1 | 51422.8 | 62262.1 | 75099.4 | 91979.9  | 109891.3 |
| 8819.0  | 33837.1 | 42994.2 | 51458.9 | 62266.3 | 75108.5 | 91997.1  | 109993.5 |
| 9107.6  | 33866.1 | 43005.2 | 51492.9 | 62272.1 | 75300.4 | 92015.6  | 110031.8 |
| 9176.5  | 33881.7 | 43011.1 | 51646.0 | 62288.0 | 75354.2 | 92087.0  | 110130.8 |
| 9660.4  | 33901.9 | 43039.2 | 51239.6 | 62294.3 | 75382.1 | 92126.8  | 110407.6 |
| 9953.8  | 33914.9 | 43082.1 | 52199.0 | 62352.1 | 75495.9 | 92252.1  | 110513.3 |
| 9975.3  | 33945.3 | 43092.0 | 52287.1 | 62379.3 | 75579.7 | 92278.3  | 110575.1 |
| 10007.6 | 33998.3 | 43123.5 | 52347.7 | 62387.0 | 75601.0 | 92353.9  | 110631.2 |
| 10037.1 | 34014.5 | 43168.4 | 52390.5 | 62411.4 | 75622.8 | 92465.7  | 110806.0 |
| 10059.8 | 34030.7 | 43211.1 | 52422.8 | 62487.5 | 75665.2 | 92555.4  | 110861.1 |
| 10095.4 | 34061.9 | 43229.2 | 52451.0 | 62934.5 | 75684.5 | 94134.1  | 111120.2 |
| 10203.7 | 34083.9 | 43238.4 | 52505.6 | 63089.5 | 75685.9 | 94205.3  | 111509.8 |
| 10257.6 | 34129.9 | 43298.9 | 52535.6 | 63149.3 | 75758.2 | 94392.3  | 113161.8 |
| 11308.5 | 34141.6 | 43305.7 | 52600.9 | 63169.6 | 75823.3 | 94763.1  | 113189.1 |
| 11372.8 | 34155.2 | 44449.1 | 52733.5 | 63264.8 | 77460.3 | 95068.7  | 113221.9 |
| 11383.8 | 34167.6 | 44501.1 | 52744.6 | 63314.7 | 77526.3 | 95415.2  | 113293.1 |
| 11416.1 | 34203.8 | 44740.3 | 52936.4 | 63335.4 | 77717.6 | 95481.7  | 113721.8 |
| 11471.9 | 34247.3 | 45009.4 | 53067.2 | 63398.9 | 78410.6 | 95567.7  | 113834.8 |
| 13007.1 | 34470.8 | 45019.3 | 53165.1 | 63484.0 | 78725.7 | 95743.2  | 113993.2 |
| 13052.3 | 34638.3 | 45075.8 | 53409.9 | 63534.7 | 79819.8 | 96040.9  | 114149.0 |
| 13069.5 | 34720.5 | 45096.8 | 53486.4 | 63559.7 | 80264.6 | 96412.9  | 114318.4 |
| 13097.5 | 34797.2 | 45113.4 | 53631.3 | 63570.6 | 81001.0 | 96722.9  | 114525.8 |
| 14320.8 | 35617.9 | 45190.0 | 53755.8 | 63656.2 | 81116.5 | 97198.0  | 114602.8 |
| 14325.6 | 35681.1 | 45219.5 | 54496.8 | 63691.0 | 81199.3 | 97275.2  | 114693.9 |
| 14350.3 | 35714.5 | 45221.4 | 54591.0 | 63813.5 | 81344.8 | 97312.4  | 114970.9 |
| 15129.9 | 35746.6 | 45254.0 | 54651.4 | 63822.1 | 81350.1 | 97596.2  | 115349.9 |
| 15142.1 | 35828.4 | 45267.3 | 54655.8 | 63835.0 | 81356.3 | 97645.4  | 115713.6 |
| 15641.8 | 35847.0 | 45317.6 | 54669.4 | 63845.7 | 81363.3 | 97716.1  | 116154.4 |
| 24175.1 | 35861.7 | 45323.7 | 54696.5 | 63855.1 | 81452.9 | 97764.0  | 116402.2 |
| 24225.3 | 35881.0 | 45433.2 | 54717.5 | 63920.7 | 81581.2 | 97833.9  | 116558.2 |
| 24294.1 | 35910.0 | 45440.6 | 54726.2 | 63929.2 | 81584.6 | 98188.2  | 117682.3 |
| 24343.3 | 35919.9 | 45488.8 | 54734.5 | 63938.1 | 81597.0 | 98216.5  | 117768.2 |
| 24413.4 | 35998.1 | 45535.8 | 54750.7 | 63986.6 | 81600.8 | 98348.9  | 117805.7 |
| 24816.5 | 36013.8 | 45584.8 | 54860.5 | 64000.1 | 81624.0 | 98452.7  | 117917.7 |
| 24832.1 | 36065.5 | 45613.0 | 54887.3 | 64015.2 | 81660.5 | 98606.4  | 118507.1 |
| 24994.3 | 36254.5 | 45637.1 | 54959.0 | 64120.4 | 81774.2 | 100190.4 | 120527.5 |
| 25227.3 | 36314.1 | 45684.5 | 55015.8 | 64174.7 | 81902.5 | 100214.5 | 121311.7 |
| 25245.7 | 36327.1 | 45798.1 | 55229.0 | 64187.3 | 81926.2 | 100238.7 | 125235.5 |
| 25306.3 | 36661.8 | 45991.3 | 55286.8 | 64488.9 | 81937.7 | 100275.5 | 125307.6 |
| 25341.8 | 36761.3 | 46222.5 | 55457.3 | 65229.5 | 81956.6 | 100369.4 | 125415.3 |
| 25355.1 | 36765.9 | 46254.0 | 55592.4 | 65258.9 | 81999.7 | 100498.0 | 125558.1 |
| 26604.3 | 36807.1 | 46391.2 | 55644.6 | 65324.5 | 82004.1 | 100533.0 | 125715.9 |
| 26802.1 | 37186.0 | 46494.5 | 55714.5 | 65451.8 | 82153.2 | 100597.8 | 125915.2 |
| 26878.6 | 37190.9 | 46498.7 | 55799.6 | 65575.0 | 82186.8 | 100625.0 | 126290.1 |
| 26971.4 | 37196.9 | 46534.2 | 55864.2 | 65771.3 | 82198.2 | 100631.0 | 126308.0 |
| 27002.6 | 37201.2 | 46540.4 | 55904.6 | 65806.4 | 82219.3 | 100640.8 | 126398.2 |
| 27032.3 | 37226.3 | 46601.3 | 55977.1 | 65837.1 | 82221.7 | 100887.3 | 126555.0 |
| 27146.6 | 37272.9 | 46622.0 | 55979.1 | 65899.8 | 82418.4 | 100992.6 | 126758.8 |
| 27166.9 | 37331.4 | 46648.2 | 56034.2 | 65992.8 | 82581.5 | 101557.7 | 126976.6 |
| 27184.1 | 37358.1 | 46664.1 | 56086.8 | 66125.8 | 82796.3 | 101684.1 | 127213.3 |
| 27228.2 | 37372.1 | 46695.3 | 56160.8 | 66151.6 | 82981.6 | 101691.3 | 127534.3 |
| 27254.4 | 37644.3 | 46713.1 | 56192.1 | 66253.2 | 83026.7 | 101719.8 | 128106.7 |
| 27268.1 | 37705.2 | 46862.5 | 56256.2 | 66321.4 | 84518.9 | 101770.4 | 128208.1 |
| 27273.8 | 37742.6 | 46871.7 | 56380.4 | 66349.5 | 84579.9 | 101811.3 | 128796.7 |
| 27284.2 | 37797.7 | 46952.9 | 56537.0 | 66389.4 | 84673.6 | 102011.9 | 129010.2 |
| 27298.5 | 37812.9 | 47026.5 | 56717.6 | 66395.6 | 84737.5 | 102083.2 | 129489.2 |
| 27428.0 | 37858.0 | 47074.5 | 56922.9 | 66537.7 | 84747.3 | 102126.3 | 130353.2 |
| 27736.3 | 37885.6 | 47101.5 | 57187.4 | 66609.9 | 84775.6 | 102160.7 | 136480.7 |
| 27959.1 | 37919.0 | 47480.5 | 57454.8 | 66679.7 | 84799.5 | 102296.0 | 136804.0 |
| 28040.3 | 37921.5 | 47664.1 | 57752.9 | 67109.1 | 84807.7 | 102328.9 | 137490.9 |
| 28261.2 | 37958.9 | 47717.9 | 57759.0 | 67141.3 | 84845.6 | 102557.7 | 139458.2 |
| 28374.4 | 38109.8 | 47768.2 | 57826.4 | 67174.3 | 84859.5 | 102653.5 | 139693.4 |
| 28421.4 | 38220.8 | 47780.0 | 57858.1 | 67282.4 | 84971.0 | 102856.0 | 140135.1 |
| 28445.5 | 38242.9 | 47800.7 | 57890.2 | 67312.2 | 85065.8 | 102877.6 | 140790.6 |
| 28454.0 | 38332.8 | 47824.5 | 57898.6 | 67319.7 | 85071.7 | 102995.1 | 144170.2 |

## Supporting Information

|         |         |         |         |         |         |          |          |
|---------|---------|---------|---------|---------|---------|----------|----------|
| 28476.2 | 38349.2 | 47886.5 | 59031.0 | 67365.4 | 85101.9 | 103071.7 | 144382.7 |
| 28483.4 | 38437.5 | 47895.2 | 59052.0 | 67445.0 | 85138.4 | 103386.9 | 144635.2 |
| 28494.5 | 38658.7 | 47974.5 | 59068.2 | 67464.7 | 85142.0 | 103558.1 | 144845.3 |
| 28506.3 | 38745.9 | 48068.1 | 59117.2 | 67526.0 | 85203.5 | 103620.9 | 144922.0 |
| 28532.4 | 38758.0 | 48198.7 | 59258.0 | 67529.4 | 85238.5 | 103625.8 | 146876.8 |
| 28575.0 | 38772.3 | 48471.5 | 59335.7 | 67554.6 | 85275.1 | 103774.6 | 147268.7 |
| 28584.4 | 38781.1 | 49016.4 | 59423.7 | 67647.7 | 85303.6 | 103781.8 | 147414.5 |
| 28633.2 | 38787.8 | 49022.2 | 59426.8 | 67656.6 | 85312.5 | 103822.9 | 147627.1 |
| 28637.6 | 38895.3 | 49038.3 | 59480.6 | 67671.3 | 85322.5 | 103830.2 | 147720.8 |
| 28749.5 | 38914.2 | 49074.8 | 59521.2 | 67699.8 | 85403.3 | 103937.4 | 147885.1 |
| 28763.0 | 39158.9 | 49225.0 | 59581.3 | 67728.8 | 85409.7 | 104020.0 | 150059.4 |
| 28789.9 | 39161.1 | 49231.4 | 59648.3 | 67738.9 | 85489.8 | 104067.7 | 150309.0 |
| 28844.6 | 39162.4 | 49248.4 | 59705.7 | 67792.1 | 85581.4 | 104130.3 | 150623.9 |
| 28849.9 | 39166.6 | 49307.1 | 59740.0 | 67878.3 | 85622.9 | 104136.5 | 150825.1 |
| 28928.4 | 39171.0 | 49354.2 | 59823.0 | 68052.7 | 85661.9 | 104158.1 | 150904.2 |
| 28931.9 | 39185.5 | 49393.0 | 59986.7 | 68274.7 | 85723.1 | 104172.4 | 150945.2 |
| 28939.8 | 39204.8 | 49393.7 | 60144.0 | 68306.9 | 85747.3 | 104195.0 | 150970.7 |
| 28955.1 | 39236.8 | 49396.8 | 60286.4 | 68367.5 | 85805.3 | 104303.8 | 153704.8 |
| 29017.9 | 39276.0 | 49431.9 | 60291.0 | 68481.2 | 85869.5 | 104371.9 | 154137.4 |
| 29033.4 | 39278.0 | 49472.2 | 60351.1 | 68633.6 | 85904.3 | 104407.1 | 154431.3 |
| 29052.5 | 39301.3 | 49566.0 | 60414.2 | 68752.2 | 86008.9 | 104569.1 | 154538.3 |
| 29096.3 | 39324.9 | 49728.2 | 60416.8 | 68857.3 | 86089.8 | 104608.6 | 154581.4 |
| 29105.9 | 39378.5 | 49906.1 | 60452.7 | 69293.4 | 86105.9 | 104639.1 | 178018.3 |
| 30068.7 | 39552.8 | 49931.5 | 60469.0 | 69379.2 | 86251.0 | 104687.2 | 178561.3 |
| 30191.8 | 39591.1 | 49960.3 | 60476.3 | 69597.4 | 86420.4 | 104698.4 | 179729.7 |
| 30350.3 | 39636.8 | 50100.7 | 60575.7 | 69765.8 | 86687.0 | 104723.3 | 181999.6 |
| 30448.5 | 39645.9 | 50107.3 | 60596.9 | 69794.8 | 86694.8 | 104776.7 | 182590.7 |
| 30463.4 | 39665.1 | 50118.9 | 60733.7 | 69830.7 | 86799.0 | 104790.5 | 182806.8 |
| 30475.6 | 39684.6 | 50203.3 | 60756.9 | 69869.8 | 87368.3 | 104798.7 | 182819.1 |
| 30514.1 | 39685.1 | 50251.5 | 60779.7 | 70068.6 | 87636.7 | 104947.9 | 183094.8 |
| 30553.9 | 39977.0 | 50276.1 | 60791.5 | 70089.6 | 89257.0 | 104997.1 | 183110.0 |
| 30562.9 | 40024.2 | 50292.7 | 60907.2 | 70110.1 | 89312.5 | 105070.7 | 185582.2 |
| 30579.6 | 40035.7 | 50292.8 | 60913.8 | 70257.3 | 89384.2 | 105095.0 | 185833.5 |
| 30661.3 | 40130.4 | 50308.2 | 60953.7 | 70394.2 | 89545.2 | 105117.4 | 186430.4 |
| 30694.2 |         |         |         |         |         |          |          |

**Table S23:** NEVPT2 computed the spin-orbit states for  $[\text{Dy}(\text{C}_6\text{H}_6)_2]^{3+}$  complex. All the values are reported here in  $\text{cm}^{-1}$ .

| 3                 |         |         |         |         |         |         |          |
|-------------------|---------|---------|---------|---------|---------|---------|----------|
| Spin Orbit States |         |         |         |         |         |         |          |
| NEVPT2            |         |         |         |         |         |         |          |
| 0.0               | 31129.4 | 39697.1 | 49323.3 | 58722.8 | 66949.2 | 83223.6 | 98475.6  |
| 408.9             | 31162.7 | 39733.5 | 49476.2 | 58728.1 | 66976.9 | 83362.5 | 98480.8  |
| 572.1             | 31212.1 | 39818.4 | 49645.5 | 58786.0 | 67018.7 | 83428.1 | 98572.2  |
| 665.4             | 31332.9 | 39840.5 | 49957.6 | 58837.0 | 67160.1 | 83569.0 | 98584.1  |
| 779.1             | 31470.5 | 39844.4 | 50056.8 | 58894.8 | 67262.2 | 83591.2 | 98653.5  |
| 927.6             | 31551.7 | 39848.7 | 50148.0 | 58897.4 | 67349.9 | 83696.7 | 98697.5  |
| 1070.8            | 31587.3 | 39895.9 | 50230.1 | 59024.2 | 67444.8 | 83814.6 | 98748.9  |
| 1165.9            | 31632.4 | 39939.0 | 50245.3 | 59055.0 | 68077.6 | 83977.3 | 98758.6  |
| 3280.1            | 31685.2 | 39954.0 | 50324.5 | 59104.6 | 68355.3 | 84066.2 | 98803.9  |
| 3354.9            | 31692.1 | 39962.8 | 50335.4 | 59171.0 | 68406.9 | 84192.5 | 98828.4  |
| 3629.0            | 31725.5 | 40019.9 | 50348.9 | 59182.8 | 68470.8 | 84211.9 | 99061.1  |
| 3845.5            | 31758.3 | 40044.5 | 50385.2 | 59269.7 | 68657.2 | 84239.6 | 99381.0  |
| 3946.8            | 31818.3 | 40051.1 | 50398.8 | 59285.9 | 68660.9 | 84276.7 | 99447.9  |
| 3975.6            | 31845.3 | 40061.4 | 50482.2 | 59297.5 | 68831.3 | 84292.2 | 99522.5  |
| 4024.6            | 31906.7 | 40072.0 | 50482.5 | 59325.9 | 68878.2 | 84371.0 | 99687.6  |
| 5559.5            | 31924.6 | 40108.8 | 50489.3 | 59331.9 | 68932.0 | 84521.2 | 99950.5  |
| 5604.8            | 31951.5 | 40138.5 | 50524.1 | 59378.8 | 68981.0 | 84547.8 | 100115.9 |
| 5885.8            | 31973.4 | 40180.3 | 50713.0 | 59442.1 | 69120.4 | 84558.7 | 100269.2 |
| 6068.7            | 32022.1 | 40189.7 | 52270.3 | 59539.1 | 69120.7 | 84617.1 | 100462.0 |
| 6103.8            | 32031.5 | 40625.1 | 52272.4 | 59621.9 | 69748.8 | 84628.4 | 100484.0 |
| 6150.9            | 32258.8 | 40689.3 | 52289.4 | 59671.4 | 70667.6 | 84697.5 | 100537.3 |
| 7325.1            | 32328.8 | 40803.4 | 52294.7 | 59792.6 | 70822.2 | 84735.8 | 100577.4 |
| 7380.2            | 32511.9 | 40818.8 | 52309.1 | 59814.8 | 70974.1 | 84757.8 | 100591.1 |
| 7661.2            | 32573.3 | 40823.2 | 52312.0 | 59872.7 | 71059.4 | 84823.2 | 100611.0 |
| 7749.0            | 32591.8 | 40836.5 | 52369.3 | 59897.6 | 71277.4 | 84935.6 | 100627.1 |
| 7823.6            | 32615.1 | 40916.3 | 52374.6 | 59913.0 | 71384.8 | 85053.8 | 100683.9 |
| 8634.3            | 32641.4 | 40943.0 | 52391.9 | 59976.2 | 71411.4 | 85187.2 | 100703.1 |
| 8705.8            | 32675.5 | 40989.8 | 52396.4 | 59988.2 | 71612.5 | 85350.5 | 101203.4 |
| 8720.2            | 32934.7 | 41025.3 | 52445.7 | 59989.3 | 71814.0 | 85370.2 | 101273.6 |
| 8745.3            | 32975.6 | 41058.3 | 52452.1 | 60023.5 | 71840.1 | 85392.1 | 101375.7 |
| 8809.3            | 33167.9 | 41090.1 | 52529.3 | 60038.5 | 71882.1 | 85460.7 | 101392.7 |
| 8827.5            | 33298.6 | 41103.0 | 52531.0 | 60086.6 | 71885.5 | 85525.5 | 101402.4 |
| 8871.7            | 33337.1 | 41134.3 | 52601.8 | 60100.7 | 71976.9 | 85573.5 | 101416.7 |
| 8994.4            | 33351.4 | 41625.2 | 52623.0 | 60107.0 | 71981.6 | 85713.6 | 101443.9 |

Supporting Information

|         |         |         |         |         |         |         |          |
|---------|---------|---------|---------|---------|---------|---------|----------|
| 9057.6  | 33368.2 | 41789.3 | 52626.9 | 60149.9 | 72033.7 | 85722.4 | 101566.5 |
| 9158.2  | 33465.6 | 41936.1 | 52644.5 | 60159.8 | 72092.9 | 85950.9 | 101739.8 |
| 9605.2  | 33481.6 | 42450.0 | 52704.5 | 60197.1 | 72339.2 | 86991.1 | 101961.0 |
| 9960.8  | 33639.1 | 42635.9 | 52708.2 | 60218.7 | 72399.3 | 87058.7 | 102373.4 |
| 10110.5 | 33698.8 | 43750.4 | 52718.7 | 60255.6 | 72406.6 | 87249.9 | 103726.9 |
| 10215.7 | 33791.0 | 43762.4 | 52746.4 | 60337.3 | 72432.9 | 87647.8 | 103747.2 |
| 10235.9 | 34019.2 | 43808.1 | 52780.5 | 60349.6 | 72433.6 | 87974.9 | 103793.7 |
| 10262.0 | 34207.3 | 43815.7 | 52819.1 | 60351.8 | 72509.5 | 88985.2 | 103899.4 |
| 10275.9 | 34268.6 | 43934.3 | 52985.5 | 60374.4 | 72522.5 | 89040.2 | 104872.1 |
| 10328.1 | 34279.4 | 43947.9 | 52994.7 | 60469.8 | 72556.2 | 89100.2 | 104964.1 |
| 11810.2 | 34313.1 | 44041.4 | 53090.1 | 60483.2 | 72586.0 | 89254.7 | 105122.4 |
| 11878.7 | 34322.2 | 44064.3 | 53115.7 | 60495.4 | 73370.1 | 89377.7 | 105142.2 |
| 11892.0 | 34340.3 | 44070.4 | 53206.9 | 60552.6 | 73579.2 | 89511.5 | 105219.1 |
| 11934.6 | 34393.8 | 44093.5 | 53218.3 | 60665.2 | 74759.9 | 89578.0 | 105243.5 |
| 13092.8 | 34407.8 | 44295.7 | 53228.6 | 60695.2 | 74864.9 | 89586.8 | 105364.7 |
| 13104.8 | 34448.0 | 44370.2 | 53234.2 | 60785.2 | 74915.1 | 90003.4 | 105499.5 |
| 13133.0 | 34515.1 | 44409.0 | 53251.6 | 60822.3 | 75111.2 | 90016.8 | 105648.6 |
| 13861.7 | 34720.0 | 44428.3 | 53269.7 | 60860.0 | 75284.9 | 90240.7 | 105897.3 |
| 13872.0 | 34745.7 | 44457.5 | 53307.9 | 60901.7 | 75288.4 | 90295.7 | 106216.3 |
| 14356.7 | 34833.4 | 44594.6 | 53449.8 | 60927.1 | 75334.7 | 90434.8 | 106834.5 |
| 23591.2 | 34884.6 | 44645.7 | 54550.4 | 60979.7 | 75343.5 | 90598.1 | 107144.0 |
| 23642.5 | 34952.0 | 44703.9 | 54635.0 | 61013.1 | 75347.1 | 91108.4 | 107319.3 |
| 23699.2 | 35071.5 | 44868.9 | 54705.0 | 61080.1 | 75371.0 | 91184.1 | 108420.8 |
| 23713.1 | 35141.0 | 45331.2 | 54746.5 | 61684.3 | 75400.6 | 91265.8 | 108484.1 |
| 23902.3 | 35310.9 | 45386.1 | 54815.2 | 61706.8 | 75445.4 | 91557.5 | 108505.8 |
| 24629.9 | 35400.2 | 45428.2 | 54844.9 | 61749.1 | 75452.7 | 92058.1 | 108606.2 |
| 24668.4 | 35410.6 | 45462.0 | 54855.3 | 61752.9 | 75473.4 | 92419.1 | 108648.2 |
| 24854.7 | 35757.6 | 46153.9 | 54881.0 | 61987.3 | 75522.4 | 92649.2 | 110573.3 |
| 25106.8 | 35853.4 | 46216.0 | 54891.9 | 62112.9 | 75645.2 | 92973.9 | 111336.6 |
| 25132.1 | 35913.1 | 46234.5 | 54903.9 | 62132.3 | 75679.3 | 93051.2 | 116453.5 |
| 25169.3 | 36006.5 | 46278.9 | 54940.3 | 62156.5 | 75717.0 | 93069.3 | 116524.7 |
| 25204.4 | 36043.1 | 46283.5 | 54978.5 | 62189.6 | 75829.5 | 93156.9 | 116631.7 |
| 25241.4 | 36068.7 | 46301.3 | 55030.7 | 62257.5 | 75868.0 | 93188.7 | 116770.5 |
| 25259.3 | 36083.5 | 46343.6 | 55174.0 | 62388.6 | 75888.6 | 93261.1 | 116920.0 |
| 25317.6 | 36093.0 | 46395.4 | 55227.5 | 62432.7 | 75913.8 | 93324.7 | 117111.5 |
| 25417.0 | 36101.2 | 46395.8 | 55365.4 | 62524.0 | 75919.1 | 93531.3 | 117276.4 |
| 25501.1 | 36219.5 | 46414.6 | 55382.2 | 62542.3 | 75930.5 | 93740.9 | 117471.7 |
| 25611.6 | 36249.8 | 46444.3 | 55404.5 | 62570.3 | 76083.4 | 93901.1 | 117579.7 |
| 25707.9 | 36259.6 | 46489.1 | 55429.3 | 62586.8 | 76085.2 | 93994.2 | 117581.8 |
| 27136.3 | 36293.2 | 46576.2 | 55432.0 | 62684.8 | 76164.4 | 94016.0 | 117738.0 |
| 27274.6 | 36309.3 | 46586.1 | 55474.0 | 62716.8 | 76174.0 | 94050.0 | 117878.8 |
| 27486.3 | 36341.5 | 46598.2 | 55480.4 | 62813.7 | 76234.6 | 94110.5 | 117941.1 |
| 27670.2 | 36412.6 | 46645.2 | 55631.2 | 62904.0 | 76267.1 | 94141.9 | 118098.4 |
| 27678.4 | 36501.7 | 46669.0 | 55756.7 | 62948.9 | 76278.5 | 94352.8 | 118152.8 |
| 27766.1 | 36587.7 | 46699.8 | 55801.0 | 63093.3 | 77789.1 | 94390.4 | 118380.0 |
| 27806.8 | 36615.8 | 46806.2 | 55842.0 | 63191.4 | 78217.2 | 94408.3 | 118547.4 |
| 27877.3 | 36745.1 | 46821.3 | 55864.3 | 63283.1 | 78382.2 | 94441.1 | 118711.2 |
| 27910.3 | 36748.6 | 46903.3 | 55906.4 | 63308.1 | 78615.1 | 94593.5 | 119365.4 |
| 27988.2 | 36766.4 | 46911.0 | 55986.5 | 63320.1 | 78677.3 | 94671.6 | 119428.3 |
| 28125.1 | 36789.4 | 46987.5 | 56168.6 | 63371.8 | 78785.5 | 94693.8 | 123926.1 |
| 28266.8 | 37339.4 | 46993.8 | 56189.8 | 63429.1 | 78939.3 | 94708.0 | 124230.1 |
| 28294.2 | 37413.2 | 47033.6 | 56278.1 | 63506.0 | 78942.5 | 94723.6 | 124934.8 |
| 28382.2 | 37418.1 | 47109.1 | 56389.7 | 63604.6 | 78953.2 | 94789.6 | 126931.4 |
| 28415.5 | 37423.3 | 47207.2 | 56452.9 | 63731.6 | 79544.5 | 95017.3 | 127178.0 |
| 28469.4 | 37473.8 | 47282.5 | 56460.5 | 63747.0 | 79689.7 | 95034.5 | 127608.2 |
| 28535.3 | 37496.5 | 47337.2 | 56483.8 | 63777.3 | 79725.8 | 95500.5 | 128316.2 |
| 28689.2 | 37637.0 | 47357.9 | 56526.0 | 63806.7 | 79821.3 | 95515.6 | 132364.5 |
| 28854.3 | 37646.5 | 47392.2 | 56574.8 | 63823.6 | 80045.2 | 95623.4 | 132572.8 |
| 28892.7 | 37681.0 | 47408.1 | 56650.0 | 64146.0 | 80048.3 | 95629.5 | 132875.3 |
| 28930.1 | 37687.3 | 47445.7 | 56656.2 | 64268.4 | 80198.9 | 95662.6 | 133114.9 |
| 29012.0 | 37706.7 | 47457.1 | 56686.2 | 64291.7 | 80368.0 | 95934.6 | 133184.7 |
| 29119.2 | 37894.5 | 47484.6 | 56714.3 | 64370.3 | 80411.1 | 95951.9 | 134410.7 |
| 29197.3 | 37906.4 | 47502.1 | 56730.9 | 64469.0 | 80442.5 | 96098.9 | 134915.8 |
| 29238.0 | 37932.7 | 47523.8 | 56735.9 | 64477.6 | 80507.4 | 96205.1 | 135114.2 |
| 29270.9 | 37951.1 | 47526.6 | 56761.7 | 64536.1 | 80508.2 | 96513.5 | 135523.3 |
| 29296.4 | 38019.0 | 47530.2 | 56825.4 | 64559.3 | 80542.8 | 96665.1 | 135935.9 |
| 29350.9 | 38067.0 | 47580.8 | 56864.4 | 64577.0 | 80599.4 | 96728.7 | 136037.6 |
| 29378.6 | 38158.2 | 47604.4 | 56903.9 | 64605.5 | 80684.0 | 96767.3 | 137133.0 |
| 29389.0 | 38170.9 | 47614.9 | 56925.1 | 64654.7 | 80761.8 | 96775.4 | 137789.1 |
| 29409.3 | 38194.8 | 47627.0 | 56944.6 | 64675.0 | 80917.5 | 96808.4 | 138188.5 |
| 29480.9 | 38218.4 | 47651.0 | 57057.7 | 64822.5 | 80999.2 | 96869.9 | 138431.2 |
| 29604.4 | 38233.8 | 47735.1 | 57123.1 | 64833.2 | 81261.9 | 96918.7 | 138508.4 |
| 29651.8 | 38265.4 | 47763.8 | 57210.2 | 64974.8 | 81559.9 | 96976.5 | 138551.2 |
| 29718.8 | 38277.9 | 47767.3 | 57242.8 | 65015.7 | 81620.6 | 96996.4 | 138579.7 |
| 29784.3 | 38293.3 | 47771.6 | 57328.9 | 65046.0 | 81699.8 | 97147.9 | 141235.8 |
| 29888.8 | 38393.1 | 47818.4 | 57360.7 | 65089.6 | 81745.0 | 97219.1 | 141749.8 |
| 30104.8 | 38485.5 | 47904.7 | 57386.1 | 65103.6 | 81821.0 | 97247.9 | 142075.2 |

## Supporting Information

|         |         |         |         |         |         |         |          |
|---------|---------|---------|---------|---------|---------|---------|----------|
| 30259.8 | 38494.7 | 47969.5 | 57698.3 | 65131.3 | 81927.3 | 97250.8 | 142176.6 |
| 30276.0 | 38516.6 | 48041.4 | 57745.8 | 65222.4 | 82052.3 | 97344.1 | 142225.3 |
| 30291.4 | 38658.4 | 48051.1 | 57925.1 | 65274.8 | 82149.8 | 97379.9 | 161547.1 |
| 30308.9 | 38704.9 | 48073.9 | 58359.3 | 65316.9 | 82269.1 | 97478.5 | 162031.9 |
| 30338.1 | 38750.0 | 48170.1 | 58409.3 | 65444.2 | 82377.1 | 97528.4 | 162986.4 |
| 30371.9 | 38840.2 | 48188.5 | 58459.8 | 65527.6 | 82429.8 | 97624.0 | 165174.4 |
| 30427.4 | 38877.9 | 48257.4 | 58513.1 | 65591.4 | 82451.2 | 97691.7 | 165456.9 |
| 30457.0 | 38913.5 | 48271.9 | 58517.4 | 65750.8 | 82580.3 | 97766.7 | 165501.8 |
| 30519.3 | 39002.7 | 48334.3 | 58525.3 | 65955.3 | 82615.4 | 97839.0 | 165985.4 |
| 30650.9 | 39494.7 | 48392.6 | 58530.0 | 65985.3 | 82643.2 | 97905.8 | 166237.1 |
| 30685.1 | 39530.3 | 48443.9 | 58552.6 | 66002.2 | 82804.8 | 97928.8 | 166494.7 |
| 30732.6 | 39586.1 | 49161.4 | 58575.4 | 66080.7 | 82887.3 | 98023.3 | 168352.7 |
| 30904.0 | 39633.3 | 49191.3 | 58603.0 | 66126.8 | 82941.3 | 98156.6 | 168642.7 |
| 30949.0 | 39666.9 | 49234.0 | 58655.1 | 66193.3 | 83067.2 | 98321.2 | 169558.4 |
| 31062.4 |         |         |         |         |         |         |          |

**Table S24:** CASSCF computed 21 roots of sextet (red) along with 224 roots of quartet and 490 roots of doublet states for  $[\text{Dy}(\text{C}_7\text{H}_7)_2]^{3-}$  complex. All the values are reported herein  $\text{cm}^{-1}$ .

| 4                |         |         |         |         |          |
|------------------|---------|---------|---------|---------|----------|
| Spin free States |         |         |         |         |          |
| CASSCF           |         |         |         |         |          |
| 0.7              | 36523.1 | 46708.6 | 56720.8 | 79067.6 | 97205.8  |
| 122.2            | 36536.0 | 46708.6 | 56720.9 | 79082.9 | 97216.6  |
| 122.2            | 36536.1 | 46912.6 | 56764.2 | 79082.9 | 97216.7  |
| 213.0            | 36699.9 | 46912.6 | 56766.2 | 79092.5 | 97531.3  |
| 223.3            | 36702.2 | 46915.3 | 56919.4 | 79092.5 | 97856.7  |
| 364.6            | 36783.8 | 46915.4 | 56919.7 | 79232.3 | 97886.2  |
| 384.4            | 36790.0 | 47092.8 | 57014.4 | 79232.3 | 98113.7  |
| 410.1            | 36824.0 | 47095.0 | 57014.4 | 79403.6 | 98114.8  |
| 1081.8           | 36829.0 | 47189.1 | 58342.8 | 79403.6 | 100408.4 |
| 1081.8           | 36873.3 | 47200.0 | 58342.8 | 79541.3 | 100408.4 |
| 7403.6           | 36918.1 | 47234.5 | 58554.1 | 79541.3 | 100427.5 |
| 7409.6           | 36918.2 | 47387.8 | 58609.9 | 79692.9 | 100427.6 |
| 7653.7           | 36950.2 | 47387.8 | 58619.9 | 79692.9 | 100467.0 |
| 7653.9           | 36953.5 | 47698.9 | 58634.6 | 79750.8 | 100467.1 |
| 7778.9           | 36953.5 | 47705.7 | 58634.8 | 79752.0 | 100498.5 |
| 7781.8           | 37128.7 | 47728.2 | 58701.6 | 79764.8 | 100500.7 |
| 8002.7           | 37383.4 | 47764.3 | 58701.7 | 79779.3 | 100514.6 |
| 34094.4          | 37383.6 | 47765.1 | 58703.9 | 79779.6 | 100522.2 |
| 34124.4          | 37452.8 | 47838.7 | 58707.1 | 79803.9 | 100524.7 |
| 34687.2          | 37456.4 | 47839.2 | 59109.7 | 79804.1 | 100570.8 |
| 24125.9          | 37582.4 | 47839.8 | 59110.3 | 79814.0 | 100570.8 |
| 24126.1          | 37595.4 | 47839.8 | 59366.1 | 79814.3 | 101855.6 |
| 24130.4          | 37882.1 | 47939.0 | 59376.0 | 79835.2 | 101855.6 |
| 24134.2          | 37882.1 | 47939.0 | 59646.1 | 79835.2 | 101911.0 |
| 24183.5          | 37883.1 | 48050.0 | 59708.3 | 84132.8 | 101911.1 |
| 24183.7          | 37883.1 | 48050.0 | 59803.3 | 84134.7 | 102188.5 |
| 24249.8          | 38049.3 | 48091.8 | 59803.6 | 84547.4 | 102188.7 |
| 24249.8          | 38049.5 | 48091.8 | 59821.0 | 84553.6 | 102229.1 |
| 24376.8          | 38130.5 | 48144.8 | 59827.0 | 84575.0 | 102229.2 |
| 24376.8          | 38130.5 | 48144.8 | 60052.3 | 85062.5 | 102445.2 |
| 24394.8          | 38268.2 | 48176.5 | 60056.3 | 85143.5 | 102451.3 |
| 24402.3          | 38268.7 | 48176.5 | 60943.8 | 85143.9 | 102547.4 |
| 24451.8          | 38431.5 | 50565.0 | 60943.8 | 85212.2 | 104639.0 |
| 24451.8          | 38440.9 | 50565.0 | 61433.1 | 85218.2 | 104639.2 |
| 24617.9          | 38496.9 | 50702.0 | 61433.1 | 85517.3 | 104665.9 |
| 24645.7          | 38707.0 | 50785.5 | 61458.4 | 85520.2 | 104666.0 |
| 24645.7          | 38707.0 | 50791.3 | 61487.7 | 85553.9 | 104766.6 |
| 24687.4          | 41341.0 | 50996.2 | 61503.9 | 85554.1 | 104767.1 |
| 24693.5          | 41341.0 | 51003.3 | 61591.3 | 86276.7 | 105009.0 |
| 24736.7          | 41414.0 | 51249.9 | 61591.4 | 86276.7 | 105014.4 |
| 24736.7          | 41414.0 | 51250.1 | 61666.8 | 86548.9 | 105139.5 |
| 24799.4          | 41438.6 | 51282.6 | 61666.8 | 86548.9 | 105775.9 |
| 24799.5          | 41448.8 | 51282.6 | 61699.4 | 86600.2 | 105776.1 |
| 24826.2          | 41488.1 | 51439.5 | 61699.5 | 86600.2 | 105966.0 |
| 24827.0          | 41530.6 | 51439.5 | 61747.5 | 86788.4 | 105966.0 |
| 24966.8          | 41530.6 | 51720.5 | 61747.5 | 86788.4 | 106168.2 |
| 24992.3          | 41628.4 | 51720.6 | 63188.5 | 86923.2 | 106176.5 |
| 24992.7          | 41628.4 | 51724.7 | 63378.1 | 86923.8 | 106525.8 |
| 24996.3          | 41680.3 | 51724.7 | 63378.6 | 86966.5 | 106545.9 |
| 24997.6          | 41680.3 | 51779.0 | 63408.2 | 86973.2 | 106681.9 |
| 25011.9          | 41700.7 | 51779.0 | 63408.2 | 86977.0 | 109677.2 |
| 25012.3          | 41700.7 | 51830.8 | 63537.7 | 86998.8 | 109689.6 |
| 25180.4          | 41712.5 | 51830.8 | 63539.9 | 87000.1 | 109691.9 |
| 25182.1          | 41712.5 | 51837.5 | 66224.3 | 87243.3 | 109708.4 |



## Supporting Information

|         |         |         |         |         |          |
|---------|---------|---------|---------|---------|----------|
| 25202.1 | 41733.6 | 51837.6 | 66758.8 | 87243.4 | 109715.8 |
| 25202.1 | 41733.8 | 51935.8 | 66758.8 | 87247.4 | 110068.2 |
| 25296.6 | 41773.8 | 51936.7 | 66771.2 | 87294.1 | 110068.5 |
| 25302.2 | 41775.4 | 52009.1 | 66800.0 | 87311.5 | 113964.2 |
| 25366.4 | 41822.2 | 52013.8 | 67118.1 | 87416.7 | 113989.0 |
| 25660.2 | 41839.1 | 52039.9 | 67119.6 | 87418.3 | 114505.5 |
| 25843.5 | 41862.5 | 54435.6 | 67130.6 | 87479.6 | 119074.2 |
| 25855.6 | 41979.9 | 54441.2 | 67152.5 | 87479.7 | 119074.2 |
| 25895.7 | 42144.9 | 54464.8 | 67152.6 | 87504.3 | 119498.8 |
| 25896.3 | 42149.4 | 54464.9 | 67163.0 | 87504.7 | 119498.8 |
| 25985.7 | 42198.8 | 54474.9 | 67163.9 | 92803.6 | 119699.9 |
| 25985.7 | 42198.8 | 54475.1 | 67241.5 | 92805.1 | 119699.9 |
| 26069.0 | 42277.1 | 54645.0 | 67241.7 | 92940.9 | 119803.5 |
| 26069.1 | 42277.5 | 54648.0 | 68954.4 | 92946.0 | 119803.7 |
| 29157.1 | 42306.2 | 54751.8 | 68954.4 | 92989.3 | 119845.7 |
| 29159.5 | 42365.5 | 54938.8 | 68989.6 | 92989.5 | 119850.8 |
| 29161.3 | 42369.3 | 54938.8 | 68989.6 | 93055.1 | 119859.2 |
| 29161.5 | 42378.4 | 55178.5 | 69002.8 | 94669.5 | 119873.5 |
| 29165.1 | 42381.8 | 55198.9 | 69002.8 | 94673.5 | 119874.3 |
| 29173.7 | 42544.5 | 55208.7 | 69006.3 | 94678.3 | 119890.1 |
| 29175.3 | 42545.5 | 55217.4 | 69006.8 | 94778.2 | 119890.3 |
| 29181.3 | 42655.2 | 55217.4 | 69018.5 | 94779.2 | 122066.0 |
| 29181.5 | 42655.2 | 55226.9 | 69021.9 | 94825.8 | 122070.8 |
| 29190.6 | 42693.1 | 55226.9 | 69030.7 | 94825.8 | 122085.9 |
| 29190.6 | 42695.6 | 55256.3 | 69030.7 | 94960.2 | 122516.6 |
| 29194.8 | 42766.2 | 55257.7 | 69037.6 | 94960.2 | 122518.2 |
| 29194.9 | 42766.3 | 55307.5 | 69038.2 | 94997.5 | 131484.0 |
| 29319.2 | 42869.3 | 55307.7 | 69044.6 | 94997.5 | 131484.3 |
| 29319.2 | 42869.5 | 55313.3 | 70304.2 | 95522.0 | 131488.3 |
| 30338.2 | 42964.8 | 55313.3 | 70309.5 | 95522.0 | 131488.6 |
| 30338.2 | 42964.8 | 55346.9 | 70555.8 | 95829.6 | 131979.9 |
| 30489.7 | 42975.3 | 55346.9 | 71980.1 | 95844.3 | 131999.6 |
| 30497.4 | 42975.3 | 55735.1 | 72045.2 | 95845.7 | 132307.7 |
| 30498.8 | 43102.1 | 55735.1 | 72071.5 | 95857.4 | 139298.2 |
| 30529.0 | 43103.9 | 55742.0 | 72252.4 | 95862.6 | 139321.9 |
| 30532.4 | 43104.0 | 55742.0 | 72581.8 | 95870.1 | 139337.4 |
| 30601.5 | 43112.5 | 55785.4 | 72585.0 | 95870.1 | 139481.7 |
| 30601.7 | 43114.2 | 55816.3 | 72604.8 | 95958.2 | 139484.7 |
| 30708.4 | 43114.2 | 55819.3 | 72605.0 | 95961.8 | 139662.6 |
| 30708.5 | 43354.6 | 55938.3 | 72692.0 | 95965.0 | 139662.9 |
| 30735.7 | 44156.7 | 55941.4 | 72695.9 | 95966.5 | 139739.8 |
| 30735.7 | 44156.8 | 55971.3 | 75976.6 | 95975.8 | 139739.9 |
| 30812.3 | 44164.3 | 56035.4 | 76035.4 | 95997.1 | 141472.2 |
| 30812.3 | 44164.3 | 56044.3 | 76035.4 | 96002.2 | 141997.6 |
| 30841.5 | 44308.1 | 56106.9 | 76144.9 | 96057.3 | 142020.9 |
| 30841.5 | 44308.1 | 56107.2 | 76145.2 | 96057.3 | 145305.5 |
| 32241.4 | 44326.1 | 56126.9 | 76157.9 | 96061.5 | 145305.7 |
| 32243.0 | 44326.3 | 56136.1 | 76158.0 | 96061.7 | 145344.4 |
| 32454.5 | 44377.9 | 56158.8 | 76198.4 | 96084.4 | 145344.4 |
| 32458.3 | 44378.0 | 56158.9 | 76203.9 | 96084.4 | 145545.3 |
| 32759.1 | 44412.9 | 56182.5 | 76206.4 | 96123.4 | 145550.0 |
| 33812.7 | 44418.2 | 56182.5 | 76216.2 | 96123.4 | 145855.2 |
| 33857.8 | 44461.1 | 56196.7 | 76222.6 | 96197.2 | 145867.8 |
| 33861.8 | 44461.1 | 56196.7 | 77536.0 | 96197.3 | 145993.7 |
| 33902.4 | 44492.7 | 56209.9 | 77538.3 | 96723.7 | 146093.7 |
| 33907.9 | 44494.5 | 56210.4 | 77579.6 | 96723.7 | 146093.7 |
| 33926.8 | 44525.9 | 56290.8 | 77593.0 | 96789.8 | 173814.5 |
| 33927.1 | 44525.9 | 56290.8 | 77733.7 | 96834.2 | 173821.5 |
| 33958.1 | 44554.7 | 56471.1 | 78100.5 | 96852.5 | 174364.3 |
| 33958.1 | 44555.5 | 56493.5 | 78100.8 | 96971.9 | 174644.6 |
| 33988.8 | 44556.8 | 56510.0 | 78891.2 | 96974.8 | 174664.6 |
| 33988.8 | 44710.8 | 56574.1 | 78927.6 | 97050.5 | 176846.3 |
| 36263.7 | 44727.8 | 56592.0 | 78929.2 | 97050.5 | 176849.6 |
| 36263.7 | 44736.0 | 56594.6 | 78972.0 | 97117.3 | 176953.0 |
| 36292.6 | 44793.7 | 56625.7 | 78972.0 | 97117.5 | 176953.6 |
| 36292.6 | 45423.0 | 56626.6 | 79004.9 | 97172.2 | 177182.9 |
| 36370.8 | 45430.3 | 56627.0 | 79007.3 | 97172.4 | 177255.9 |
| 36370.8 | 45605.0 | 56643.6 | 79067.5 | 97205.8 | 177277.0 |
| 36523.1 | 45613.1 |         |         |         |          |

**Table S25:** NEVPT2 computed 21 roots of sextet (red) along with 224 roots of quartet and 490 roots of doublet states for  $[\text{Dy}(\text{C}_7\text{H}_7)_2]^{3-}$  complex. All the values are reported herein  $\text{cm}^{-1}$ .

|                  |
|------------------|
| 4                |
| Spin free States |
| NEVPT2           |

Supporting Information

|         |         |         |         |         |          |
|---------|---------|---------|---------|---------|----------|
| 1.9     | 35026.7 | 44774.7 | 54677.3 | 74698.3 | 90858.2  |
| 71.4    | 35036.4 | 44774.8 | 54680.9 | 74858.9 | 90858.3  |
| 71.5    | 35053.8 | 44858.8 | 54775.5 | 74859.0 | 90968.3  |
| 310.6   | 35231.1 | 44872.3 | 54778.8 | 74884.2 | 91076.0  |
| 330.0   | 35237.4 | 44910.8 | 54814.7 | 74884.2 | 91102.5  |
| 396.3   | 36837.1 | 44947.6 | 54814.7 | 74925.5 | 91102.6  |
| 435.8   | 36837.1 | 44947.6 | 54831.4 | 74925.6 | 91135.9  |
| 449.9   | 36946.3 | 44997.5 | 54831.4 | 75247.5 | 91136.0  |
| 1575.2  | 36946.3 | 44997.5 | 55400.9 | 75315.1 | 93015.9  |
| 1575.3  | 36989.5 | 48796.8 | 55401.0 | 75326.7 | 93016.2  |
| 6180.8  | 36989.6 | 48796.8 | 55463.9 | 76178.3 | 93047.0  |
| 6192.1  | 37259.7 | 48800.2 | 55468.1 | 76178.3 | 93047.9  |
| 6538.7  | 37259.7 | 48800.2 | 55595.2 | 76395.7 | 93084.7  |
| 6539.3  | 37346.0 | 49013.3 | 55708.6 | 76395.7 | 93104.5  |
| 6738.8  | 37346.5 | 49133.5 | 55720.6 | 76589.7 | 93138.6  |
| 6743.5  | 37355.3 | 49138.7 | 55742.6 | 76589.7 | 93151.1  |
| 7023.5  | 37355.9 | 49421.6 | 55742.6 | 76735.3 | 93154.3  |
| 28765.3 | 37387.9 | 49434.3 | 55809.7 | 76735.3 | 93166.9  |
| 28797.8 | 37388.4 | 49747.0 | 55820.7 | 76789.9 | 93171.6  |
| 29621.8 | 37509.8 | 49747.0 | 55832.3 | 76790.0 | 93308.2  |
| 22835.7 | 37514.9 | 49780.4 | 55833.1 | 76808.1 | 93308.3  |
| 22871.4 | 37592.4 | 49780.9 | 55850.8 | 76808.4 | 93841.0  |
| 23294.0 | 37592.4 | 49841.9 | 55852.5 | 76813.2 | 93841.2  |
| 23310.9 | 37730.4 | 49841.9 | 56216.6 | 76814.5 | 93876.1  |
| 23564.1 | 37740.3 | 50060.2 | 56648.4 | 76828.6 | 93876.6  |
| 23582.0 | 37799.7 | 50060.2 | 56708.4 | 76835.2 | 94107.6  |
| 23582.4 | 37799.7 | 50157.5 | 56711.0 | 76845.3 | 94113.3  |
| 23607.4 | 37822.4 | 50172.1 | 56712.0 | 76854.9 | 94174.2  |
| 23794.0 | 37901.4 | 50194.7 | 56715.1 | 76857.5 | 94175.4  |
| 23802.2 | 37901.4 | 50245.4 | 57042.0 | 78418.6 | 94235.9  |
| 23819.4 | 37942.3 | 50250.3 | 57047.8 | 78573.1 | 94237.5  |
| 23826.9 | 37943.7 | 50364.5 | 57269.1 | 78574.7 | 94268.8  |
| 23844.4 | 38200.3 | 50365.5 | 57269.2 | 78746.6 | 94285.4  |
| 23975.9 | 38213.7 | 50375.9 | 57913.0 | 78763.6 | 94343.5  |
| 24259.4 | 38297.8 | 50377.6 | 57913.0 | 78960.7 | 94343.6  |
| 24264.6 | 38507.0 | 50522.8 | 57917.7 | 78960.7 | 94604.8  |
| 24264.8 | 38519.0 | 50522.8 | 57970.2 | 79135.2 | 94609.4  |
| 24386.0 | 38542.9 | 50697.7 | 57988.2 | 79135.3 | 94620.5  |
| 24388.1 | 38584.1 | 50697.7 | 58133.0 | 79223.7 | 94623.5  |
| 24389.4 | 38584.1 | 50756.7 | 58133.5 | 79240.2 | 94743.6  |
| 24403.2 | 39214.5 | 50756.7 | 58248.5 | 79802.0 | 94804.3  |
| 24496.1 | 39384.0 | 50761.0 | 58248.5 | 79893.5 | 96093.5  |
| 24496.4 | 39388.1 | 50761.0 | 58314.5 | 79894.5 | 96096.1  |
| 24547.9 | 39625.5 | 50836.7 | 58315.2 | 79983.5 | 96494.3  |
| 24635.8 | 39625.8 | 50836.7 | 58391.2 | 80017.6 | 96494.5  |
| 24685.3 | 39725.4 | 50844.0 | 58391.3 | 80195.4 | 96725.5  |
| 24685.4 | 39754.5 | 50844.0 | 58501.2 | 80203.3 | 96755.6  |
| 24751.1 | 40245.9 | 50890.8 | 58871.9 | 80241.0 | 97123.1  |
| 25047.9 | 40246.7 | 50890.8 | 58873.9 | 80241.8 | 97248.0  |
| 25981.1 | 40557.1 | 50935.3 | 58885.8 | 80310.8 | 97440.3  |
| 25986.4 | 40558.1 | 50935.3 | 58886.5 | 80313.1 | 100297.8 |
| 25986.6 | 40891.3 | 50951.2 | 59100.7 | 80351.7 | 100298.0 |
| 26043.5 | 40908.9 | 50952.1 | 59105.4 | 80357.2 | 100309.1 |
| 26043.6 | 41055.1 | 50956.8 | 59989.3 | 80665.2 | 100353.2 |
| 26073.0 | 41142.1 | 50957.4 | 60805.0 | 80665.5 | 100365.4 |
| 26361.3 | 42134.6 | 51133.1 | 60836.6 | 81058.2 | 100894.8 |
| 26361.3 | 42146.4 | 51133.3 | 62811.8 | 81058.2 | 100895.2 |
| 26640.9 | 42392.6 | 51283.0 | 62811.9 | 81259.9 | 103814.9 |
| 26643.2 | 42400.8 | 51286.6 | 63332.9 | 81277.0 | 103840.7 |
| 26848.4 | 42419.4 | 51339.7 | 63344.8 | 81343.9 | 104539.7 |
| 26848.4 | 42419.4 | 51662.2 | 63349.2 | 81348.6 | 109755.2 |
| 27318.3 | 42426.3 | 51672.9 | 63372.4 | 81352.6 | 109755.4 |
| 27326.9 | 42426.9 | 51792.2 | 63373.0 | 81386.5 | 110363.8 |
| 27327.7 | 42452.3 | 51792.4 | 63394.8 | 81386.8 | 110363.8 |
| 27430.8 | 42452.3 | 51853.7 | 63395.1 | 84637.9 | 110597.5 |
| 27430.8 | 42571.4 | 51854.5 | 63512.5 | 84644.2 | 110597.6 |
| 27439.8 | 42571.7 | 51980.9 | 63513.2 | 84812.7 | 110734.7 |
| 27439.8 | 42627.9 | 52014.1 | 65205.8 | 84826.7 | 110741.6 |
| 29401.5 | 42632.3 | 52036.2 | 65261.6 | 84885.0 | 110749.5 |
| 29404.1 | 42632.3 | 52036.4 | 65273.0 | 84885.4 | 110750.9 |
| 29405.7 | 42640.8 | 52036.4 | 65277.4 | 84973.6 | 110770.5 |
| 29408.3 | 42641.7 | 52057.0 | 65286.7 | 87097.5 | 110818.8 |
| 29410.4 | 42642.7 | 52059.4 | 65678.7 | 87104.8 | 110826.7 |
| 29431.9 | 42726.6 | 52157.5 | 65832.6 | 87144.1 | 110870.0 |
| 29433.9 | 42730.3 | 52174.7 | 65832.6 | 87267.4 | 110877.3 |
| 29445.7 | 42816.9 | 52298.1 | 65933.6 | 87290.3 | 110877.8 |
| 29452.1 | 42981.9 | 52604.7 | 65933.6 | 87294.4 | 110902.1 |

## Supporting Information

|         |         |         |         |         |          |
|---------|---------|---------|---------|---------|----------|
| 29492.7 | 42982.0 | 52614.3 | 65949.4 | 87298.2 | 110903.1 |
| 29492.8 | 42996.9 | 52614.5 | 65951.4 | 87343.7 | 111392.3 |
| 29521.8 | 42999.2 | 52640.1 | 65952.1 | 87344.1 | 111417.8 |
| 29521.9 | 43267.0 | 52657.9 | 65953.0 | 87601.3 | 118427.7 |
| 29583.2 | 43274.0 | 52693.4 | 65957.5 | 87601.9 | 118431.3 |
| 29585.3 | 43341.5 | 52740.3 | 65967.1 | 87662.3 | 118431.6 |
| 29690.0 | 43342.3 | 52836.1 | 65969.1 | 87663.6 | 118445.7 |
| 29690.0 | 43361.6 | 52836.4 | 65975.4 | 87833.7 | 119179.9 |
| 29897.2 | 43456.1 | 52952.3 | 65975.5 | 87868.8 | 119202.4 |
| 29905.6 | 43456.3 | 52953.8 | 66007.3 | 87871.3 | 119714.1 |
| 30372.8 | 43538.0 | 52978.4 | 66007.4 | 87881.0 | 127110.1 |
| 31161.3 | 43627.5 | 52979.3 | 66067.2 | 87885.3 | 127119.8 |
| 31161.4 | 43627.5 | 53518.1 | 66067.7 | 87923.7 | 127138.2 |
| 31368.6 | 43634.9 | 53523.6 | 66242.1 | 88264.7 | 127329.1 |
| 31371.3 | 43635.0 | 53570.4 | 66750.5 | 88422.3 | 127331.3 |
| 31372.9 | 43726.2 | 53570.4 | 66756.8 | 88466.3 | 127615.7 |
| 31403.6 | 43742.8 | 53695.0 | 66974.4 | 88724.5 | 127617.8 |
| 31408.7 | 43776.9 | 53712.9 | 66981.0 | 88724.5 | 127736.0 |
| 31507.9 | 43776.9 | 53761.7 | 68559.5 | 88728.2 | 127740.1 |
| 31508.1 | 43793.8 | 53761.7 | 69798.7 | 88738.8 | 127907.6 |
| 31685.0 | 43793.9 | 53776.4 | 69799.5 | 88739.3 | 128637.8 |
| 31685.0 | 43801.7 | 53777.2 | 69836.6 | 89457.8 | 128699.3 |
| 31758.6 | 43801.7 | 53877.5 | 69837.0 | 89457.9 | 132334.6 |
| 31758.7 | 43827.5 | 53882.1 | 69925.8 | 89483.7 | 132340.4 |
| 31862.6 | 43827.5 | 53937.4 | 69925.9 | 89483.7 | 132389.9 |
| 31862.6 | 43835.1 | 53937.4 | 69937.0 | 89548.3 | 132390.7 |
| 31910.1 | 43835.1 | 53956.7 | 69948.5 | 89662.0 | 132595.3 |
| 31910.5 | 43841.7 | 53956.7 | 69952.9 | 89875.0 | 132653.0 |
| 32549.1 | 43842.3 | 53976.2 | 69991.6 | 89875.1 | 133059.3 |
| 32661.2 | 43950.1 | 53976.3 | 69999.8 | 89886.7 | 133108.4 |
| 32669.0 | 43971.2 | 53987.7 | 70099.9 | 89956.0 | 133268.5 |
| 32717.8 | 44029.6 | 54002.4 | 70102.2 | 90009.8 | 133378.4 |
| 32728.1 | 44035.3 | 54036.8 | 70105.2 | 90052.8 | 133444.1 |
| 32772.2 | 44057.2 | 54038.1 | 70120.5 | 90054.7 | 156464.4 |
| 32772.9 | 44177.4 | 54091.9 | 70450.6 | 90211.8 | 156503.3 |
| 32859.3 | 44177.4 | 54091.9 | 70994.6 | 90212.5 | 157379.2 |
| 32859.3 | 44449.4 | 54186.9 | 70995.6 | 90262.7 | 157591.3 |
| 32933.3 | 44449.6 | 54187.0 | 74420.9 | 90276.0 | 157598.7 |
| 32933.3 | 44482.4 | 54269.9 | 74509.6 | 90370.6 | 158989.3 |
| 33741.1 | 44482.7 | 54416.2 | 74511.6 | 90378.6 | 159018.7 |
| 33747.3 | 44505.4 | 54416.9 | 74613.4 | 90378.7 | 159062.3 |
| 33749.0 | 44505.7 | 54416.9 | 74613.4 | 90491.0 | 159070.1 |
| 34385.2 | 44713.3 | 54424.8 | 74648.0 | 90498.1 | 159211.9 |
| 34392.2 | 44713.4 | 54455.3 | 74651.8 | 90736.3 | 159719.2 |
| 34645.0 | 44736.7 | 54459.1 | 74697.5 | 90737.5 | 159830.3 |
| 35025.7 | 44740.4 |         |         |         |          |

**Table S26:** CASSCF computed the spin-orbit states for  $[\text{Dy}(\text{C}_7\text{H}_7)_2]^{3-}$  complex. All the values are reported here in  $\text{cm}^{-1}$ .

| 4                 |         |         |         |         |         |         |          |
|-------------------|---------|---------|---------|---------|---------|---------|----------|
| Spin Orbit States |         |         |         |         |         |         |          |
| CASSCF            |         |         |         |         |         |         |          |
| 0.0               | 30318.5 | 39766.7 | 49776.1 | 60362.0 | 69812.1 | 88860.5 | 104255.4 |
| 34.0              | 30362.9 | 39771.7 | 49817.9 | 60407.2 | 69832.7 | 89241.5 | 104266.5 |
| 59.6              | 31215.7 | 39843.6 | 49833.5 | 60417.6 | 70117.1 | 89450.6 | 104273.6 |
| 148.1             | 31220.9 | 39891.3 | 49963.6 | 60423.1 | 70406.0 | 89514.2 | 104847.7 |
| 225.4             | 31369.1 | 39935.5 | 50036.4 | 60458.5 | 70545.6 | 89519.5 | 105199.3 |
| 270.9             | 31381.1 | 39984.5 | 50118.5 | 60465.1 | 70625.1 | 89610.4 | 105295.1 |
| 272.6             | 31392.5 | 40010.6 | 50183.7 | 60839.3 | 71356.9 | 89643.4 | 105313.8 |
| 965.2             | 31459.9 | 40040.5 | 50198.9 | 60880.0 | 71774.0 | 89663.7 | 105381.5 |
| 3132.2            | 31489.8 | 40097.2 | 50238.3 | 60902.7 | 71801.3 | 89808.9 | 105632.6 |
| 3141.5            | 31491.3 | 40149.6 | 50266.0 | 60911.5 | 71834.9 | 89848.3 | 105647.1 |
| 3163.2            | 31534.2 | 40154.0 | 50274.2 | 60940.3 | 71921.3 | 89942.3 | 105683.0 |
| 3192.6            | 31550.0 | 40189.8 | 50284.9 | 60959.2 | 71948.4 | 90106.5 | 105735.7 |
| 3201.9            | 31567.2 | 40264.5 | 50308.1 | 60991.5 | 72429.8 | 90231.2 | 105823.9 |
| 3286.8            | 31570.3 | 40268.0 | 50310.8 | 61072.2 | 73728.7 | 90268.8 | 106776.8 |
| 3724.0            | 31713.0 | 40314.9 | 50334.2 | 61135.0 | 73800.9 | 90352.2 | 106809.5 |
| 5318.2            | 31767.1 | 40340.2 | 50339.3 | 61248.4 | 74087.6 | 90558.0 | 106858.0 |
| 5339.9            | 31793.7 | 40381.9 | 50392.9 | 61276.9 | 74283.5 | 90624.4 | 106863.4 |
| 5386.9            | 31815.3 | 40440.3 | 50445.5 | 61298.1 | 74291.4 | 90679.2 | 106896.0 |
| 5464.8            | 31914.4 | 41411.7 | 50481.8 | 61315.9 | 74311.3 | 90788.5 | 106928.5 |
| 5532.7            | 32209.3 | 41495.8 | 50502.8 | 61323.7 | 74315.3 | 90842.4 | 106951.8 |
| 5774.3            | 32228.7 | 41575.2 | 50513.0 | 61366.9 | 74323.1 | 90937.4 | 108770.7 |
| 7007.7            | 32337.7 | 41639.0 | 50563.0 | 61425.2 | 74331.6 | 91071.9 | 108910.7 |
| 7065.6            | 32433.3 | 41654.3 | 50607.0 | 61459.2 | 74342.4 | 91098.0 | 108917.6 |

Supporting Information

|         |         |         |         |         |         |          |          |
|---------|---------|---------|---------|---------|---------|----------|----------|
| 7138.2  | 32481.1 | 42179.9 | 50616.6 | 61465.8 | 74343.9 | 91120.8  | 108923.0 |
| 7224.9  | 32862.9 | 42231.0 | 50642.2 | 61490.6 | 74356.7 | 91152.0  | 108945.9 |
| 7430.5  | 33015.5 | 42245.1 | 50691.0 | 61491.7 | 74363.8 | 91172.4  | 109016.4 |
| 8337.4  | 33120.6 | 42291.9 | 50861.1 | 61505.8 | 74370.6 | 91188.0  | 109060.2 |
| 8393.9  | 33132.0 | 42315.6 | 50869.1 | 61508.0 | 74412.8 | 91217.4  | 109124.0 |
| 8478.8  | 33222.3 | 42343.5 | 50980.8 | 61534.2 | 74522.6 | 91219.2  | 109214.9 |
| 8782.2  | 33299.6 | 42374.8 | 50992.8 | 61592.1 | 74543.9 | 91238.9  | 109357.3 |
| 9288.4  | 33309.0 | 42409.6 | 51182.2 | 61611.3 | 74632.3 | 91254.3  | 109408.8 |
| 9412.4  | 33356.9 | 42447.7 | 51541.1 | 61626.6 | 74682.5 | 91260.9  | 109582.1 |
| 9420.8  | 33361.1 | 42455.7 | 51701.5 | 61658.8 | 74937.7 | 91281.1  | 109776.5 |
| 9452.3  | 33368.2 | 42528.0 | 51747.2 | 61730.7 | 74953.5 | 91375.4  | 109793.5 |
| 9556.3  | 33414.4 | 42550.5 | 51835.7 | 61749.6 | 74958.4 | 91516.4  | 109899.5 |
| 9577.3  | 33422.1 | 42610.2 | 51898.2 | 61770.4 | 74959.2 | 91518.3  | 110000.6 |
| 9682.0  | 33549.6 | 42655.0 | 52022.7 | 62494.7 | 74978.6 | 93341.3  | 110266.3 |
| 9765.3  | 33559.0 | 42754.8 | 52210.0 | 62496.2 | 74982.7 | 93820.3  | 110419.4 |
| 9910.7  | 33644.8 | 42808.8 | 52240.6 | 62577.3 | 75008.5 | 93839.3  | 112363.7 |
| 10814.9 | 33649.1 | 42867.7 | 52278.3 | 62728.0 | 75066.8 | 93888.0  | 112367.1 |
| 10919.0 | 33673.7 | 43860.8 | 52284.2 | 62748.0 | 76781.7 | 93932.6  | 112426.4 |
| 10959.7 | 33744.6 | 43952.7 | 52358.5 | 62754.7 | 76927.7 | 94665.1  | 112486.4 |
| 10965.2 | 33818.4 | 44215.1 | 52456.1 | 62755.5 | 77006.8 | 94975.7  | 112984.2 |
| 10990.2 | 33855.9 | 44369.6 | 52535.7 | 62776.2 | 77759.6 | 95181.3  | 113040.0 |
| 12500.1 | 33910.4 | 44521.9 | 52558.2 | 62787.4 | 77843.5 | 95295.5  | 113141.6 |
| 12510.8 | 34090.0 | 44568.0 | 52613.8 | 62844.6 | 79219.1 | 95341.0  | 113224.0 |
| 12626.6 | 34129.7 | 44593.3 | 52633.2 | 62914.7 | 79437.7 | 95355.6  | 113418.8 |
| 12707.7 | 34321.3 | 44618.8 | 52640.9 | 62944.5 | 80290.9 | 95374.7  | 113543.1 |
| 13778.3 | 35086.1 | 44635.5 | 52762.2 | 62987.5 | 80445.0 | 96580.0  | 113928.8 |
| 13850.9 | 35165.8 | 44644.8 | 53713.2 | 62991.5 | 80527.3 | 96795.4  | 113949.6 |
| 13933.2 | 35214.1 | 44667.5 | 53777.6 | 63068.0 | 80596.5 | 96808.3  | 114191.2 |
| 14654.4 | 35273.6 | 44696.5 | 53876.7 | 63072.2 | 80737.9 | 96920.0  | 114434.8 |
| 14702.4 | 35292.3 | 44715.4 | 53996.1 | 63096.8 | 80760.5 | 96923.8  | 114544.4 |
| 15175.4 | 35302.7 | 44739.1 | 54014.1 | 63209.6 | 80774.3 | 96999.3  | 115512.5 |
| 23413.7 | 35315.4 | 44826.1 | 54032.3 | 63216.8 | 80777.3 | 97154.8  | 115522.1 |
| 23456.7 | 35321.0 | 44827.3 | 54072.0 | 63272.5 | 80780.3 | 97211.4  | 115716.7 |
| 23731.3 | 35349.0 | 44892.6 | 54178.1 | 63279.5 | 80781.4 | 97249.7  | 116635.1 |
| 23854.9 | 35521.4 | 44907.1 | 54194.0 | 63287.0 | 80802.4 | 97328.1  | 116899.1 |
| 24009.6 | 35586.0 | 44946.4 | 54271.6 | 63363.7 | 80820.4 | 97413.3  | 117085.6 |
| 24417.9 | 35591.1 | 44989.2 | 54328.0 | 63378.0 | 80984.7 | 97464.7  | 117111.9 |
| 24492.9 | 35605.7 | 45141.7 | 54454.2 | 63493.7 | 80999.1 | 97509.3  | 117709.1 |
| 24549.6 | 35663.6 | 45265.5 | 54482.6 | 63514.9 | 81030.6 | 99311.9  | 119820.0 |
| 24648.7 | 35702.0 | 45266.7 | 54490.1 | 63523.0 | 81099.0 | 99675.3  | 120258.4 |
| 24654.2 | 35715.1 | 45287.1 | 54580.1 | 63524.3 | 81185.5 | 99686.7  | 124282.7 |
| 24717.2 | 35978.4 | 45314.5 | 54630.4 | 63577.5 | 81214.7 | 99691.2  | 124666.1 |
| 24732.5 | 36005.5 | 45330.6 | 54739.6 | 64548.9 | 81249.8 | 99731.1  | 124829.8 |
| 25065.6 | 36182.9 | 45342.8 | 54956.9 | 64717.2 | 81311.3 | 99763.7  | 124893.1 |
| 26165.8 | 36254.6 | 45350.2 | 55104.1 | 64729.2 | 81329.1 | 99767.2  | 124902.2 |
| 26267.0 | 36556.9 | 45764.4 | 55158.9 | 64750.4 | 81363.8 | 99821.7  | 124916.7 |
| 26301.0 | 36648.2 | 45812.3 | 55163.3 | 64760.6 | 81397.0 | 99846.3  | 124922.0 |
| 26357.6 | 36709.5 | 45855.4 | 55176.0 | 64906.4 | 81480.7 | 99908.2  | 125394.6 |
| 26369.3 | 36710.6 | 45863.3 | 55241.4 | 65293.8 | 81595.6 | 99942.4  | 125868.3 |
| 26381.4 | 36718.0 | 45943.8 | 55304.1 | 65426.8 | 81607.8 | 99998.0  | 126105.6 |
| 26451.0 | 36729.7 | 45978.8 | 55336.6 | 65480.9 | 81908.2 | 100034.3 | 126229.4 |
| 26489.3 | 36760.5 | 46135.8 | 55350.8 | 65508.9 | 81920.7 | 100811.0 | 126285.3 |
| 26547.3 | 36764.4 | 46194.4 | 55571.2 | 65547.9 | 81950.8 | 100854.3 | 126304.3 |
| 26550.4 | 36785.7 | 46224.5 | 55880.4 | 65556.4 | 81975.0 | 100918.9 | 126323.1 |
| 26647.8 | 36947.9 | 46235.8 | 55914.3 | 65584.0 | 82333.9 | 100939.3 | 126339.0 |
| 26660.6 | 37148.5 | 46306.8 | 55961.5 | 65608.1 | 83825.0 | 101022.3 | 127636.5 |
| 26823.1 | 37270.5 | 46349.4 | 55965.9 | 65642.2 | 83942.1 | 101028.5 | 127661.2 |
| 26961.1 | 37274.2 | 46365.4 | 56033.7 | 65687.5 | 83966.3 | 101213.7 | 128047.5 |
| 27036.8 | 37288.0 | 46496.6 | 56121.6 | 65692.2 | 84057.8 | 101333.4 | 128814.8 |
| 27060.3 | 37303.4 | 46526.7 | 56176.9 | 65786.9 | 84079.3 | 101635.8 | 129251.3 |
| 27109.9 | 37319.9 | 46605.0 | 56205.4 | 65836.3 | 84140.5 | 101657.7 | 135798.5 |
| 27496.6 | 37365.0 | 46753.0 | 56240.8 | 65838.6 | 84176.7 | 101719.7 | 135856.2 |
| 27502.9 | 37375.4 | 47087.0 | 56932.7 | 66388.5 | 84198.9 | 101803.6 | 136362.5 |
| 27533.4 | 37441.1 | 47103.9 | 57028.3 | 66609.8 | 84199.6 | 101855.6 | 138805.7 |
| 27606.0 | 37612.0 | 47201.5 | 57129.1 | 66712.5 | 84219.3 | 101856.4 | 138854.9 |
| 27618.4 | 37653.7 | 47216.1 | 57304.8 | 66723.5 | 84224.3 | 101885.4 | 139222.6 |
| 27746.4 | 37735.3 | 47262.9 | 57399.8 | 66778.0 | 84237.4 | 101924.3 | 139511.9 |
| 27779.7 | 37791.6 | 47270.1 | 57462.6 | 66784.1 | 84267.3 | 102175.1 | 143549.5 |
| 27963.0 | 37825.0 | 47363.0 | 58240.1 | 66790.4 | 84269.3 | 102415.7 | 143614.8 |
| 28098.1 | 37870.1 | 47382.8 | 58467.9 | 66825.5 | 84284.6 | 102624.6 | 143732.8 |
| 28102.7 | 38086.6 | 47388.9 | 58579.2 | 66915.6 | 84291.7 | 102830.4 | 143844.5 |
| 28111.4 | 38107.9 | 47482.2 | 58610.1 | 66938.8 | 84457.1 | 102836.6 | 143892.2 |
| 28131.0 | 38210.3 | 47570.4 | 58672.7 | 66946.9 | 84469.2 | 102867.3 | 146233.1 |
| 28208.1 | 38214.0 | 47623.3 | 58680.2 | 67003.2 | 84501.1 | 102987.4 | 146365.2 |
| 28212.6 | 38214.9 | 48317.2 | 58730.0 | 67004.8 | 84567.6 | 103109.0 | 146495.3 |
| 28277.1 | 38292.0 | 48374.6 | 58742.7 | 67012.5 | 84591.3 | 103165.6 | 146563.6 |
| 28296.7 | 38311.4 | 48469.0 | 58827.5 | 67014.9 | 84638.7 | 103169.1 | 146681.2 |

## Supporting Information

|         |         |         |         |         |         |          |          |
|---------|---------|---------|---------|---------|---------|----------|----------|
| 28306.1 | 38368.8 | 48572.3 | 58990.2 | 67021.6 | 84696.4 | 103170.6 | 146857.8 |
| 28308.3 | 38566.6 | 48640.0 | 58991.5 | 67029.4 | 84734.4 | 103172.8 | 148992.8 |
| 28312.2 | 38581.0 | 48684.1 | 59004.0 | 67068.4 | 84772.5 | 103274.1 | 149422.9 |
| 28315.3 | 38592.9 | 48756.2 | 59033.8 | 67087.0 | 84866.6 | 103479.4 | 149510.4 |
| 28322.9 | 38593.9 | 48765.1 | 59066.9 | 67101.8 | 84980.8 | 103511.8 | 149588.7 |
| 28366.6 | 38619.1 | 48792.5 | 59076.3 | 67125.5 | 85051.7 | 103554.2 | 149870.6 |
| 28372.9 | 38649.3 | 48794.6 | 59341.2 | 67557.6 | 85105.7 | 103572.3 | 150080.4 |
| 28396.0 | 38665.2 | 48797.2 | 59606.9 | 67848.1 | 85139.2 | 103591.7 | 150183.3 |
| 28400.3 | 38690.5 | 48833.0 | 59635.3 | 67876.1 | 85147.5 | 103652.3 | 153011.5 |
| 28407.2 | 38701.2 | 48851.1 | 59679.9 | 67887.4 | 85206.1 | 103678.2 | 153034.4 |
| 28450.4 | 38719.2 | 48904.3 | 59724.0 | 67941.3 | 85281.5 | 103705.4 | 153250.2 |
| 28475.8 | 38745.6 | 48994.2 | 59760.8 | 67993.8 | 85304.1 | 103729.8 | 153491.3 |
| 28503.6 | 38757.5 | 49044.6 | 59815.2 | 68005.7 | 85321.1 | 103762.7 | 153705.7 |
| 28572.4 | 38840.5 | 49072.3 | 59841.8 | 68176.9 | 85324.0 | 103784.6 | 177352.9 |
| 29663.9 | 38951.4 | 49336.2 | 59863.6 | 68767.2 | 85339.1 | 103795.2 | 178001.6 |
| 29695.7 | 39037.5 | 49391.3 | 59885.5 | 68906.0 | 85343.6 | 103830.5 | 178255.6 |
| 29722.7 | 39061.0 | 49427.5 | 59893.1 | 69055.9 | 85949.2 | 103924.6 | 181398.6 |
| 29736.2 | 39097.0 | 49469.6 | 59970.0 | 69184.2 | 86047.7 | 103936.9 | 181512.0 |
| 29765.3 | 39100.2 | 49500.5 | 60035.3 | 69187.0 | 86081.3 | 103952.5 | 181531.7 |
| 29813.6 | 39135.8 | 49541.5 | 60222.7 | 69219.7 | 86660.6 | 103996.1 | 181561.9 |
| 29927.9 | 39141.0 | 49582.6 | 60264.1 | 69362.0 | 86803.7 | 104052.3 | 181645.9 |
| 29961.7 | 39422.3 | 49617.9 | 60275.0 | 69529.3 | 88511.3 | 104065.6 | 182476.6 |
| 29969.3 | 39457.0 | 49636.2 | 60284.8 | 69627.0 | 88596.2 | 104120.3 | 184555.7 |
| 30090.3 | 39513.4 | 49665.6 | 60306.5 | 69691.2 | 88761.8 | 104241.5 | 184589.1 |
| 30192.1 | 39559.6 | 49716.7 | 60356.3 | 69761.2 | 88837.7 | 104248.0 | 184776.0 |
| 30249.7 |         |         |         |         |         |          |          |

**Table S27.** NEVPT2 computed the spin-orbit states for  $[\text{Dy}(\text{C}_7\text{H}_7)_2]^{3-}$  complex. All the values are reported here in  $\text{cm}^{-1}$ .

| 4                 |         |         |         |         |         |         |          |
|-------------------|---------|---------|---------|---------|---------|---------|----------|
| Spin Orbit States |         |         |         |         |         |         |          |
| NEVPT2            |         |         |         |         |         |         |          |
| 0.0               | 30634.6 | 39257.0 | 48835.2 | 58260.8 | 66269.6 | 82266.3 | 97566.7  |
| 26.2              | 30653.8 | 39298.8 | 48925.3 | 58302.2 | 66488.1 | 82362.3 | 97593.4  |
| 76.0              | 30671.3 | 39331.8 | 48979.3 | 58330.8 | 66554.4 | 82414.5 | 97639.9  |
| 166.8             | 30785.4 | 39341.3 | 49440.3 | 58380.5 | 66560.7 | 82656.1 | 97667.2  |
| 237.1             | 30822.5 | 39356.6 | 49446.0 | 58403.3 | 66687.8 | 82658.8 | 97701.9  |
| 275.1             | 30938.8 | 39371.3 | 49506.8 | 58418.5 | 66729.7 | 82859.5 | 97761.4  |
| 332.1             | 30956.3 | 39398.1 | 49513.9 | 58429.5 | 66853.5 | 82893.9 | 97774.4  |
| 1426.8            | 31012.8 | 39420.8 | 49630.9 | 58505.1 | 67475.3 | 82951.7 | 97904.5  |
| 3119.7            | 31118.7 | 39448.3 | 49641.4 | 58529.3 | 67664.3 | 83017.3 | 97988.5  |
| 3152.8            | 31317.6 | 39462.6 | 49700.1 | 58537.5 | 67716.6 | 83327.1 | 98016.2  |
| 3175.7            | 31330.8 | 39492.4 | 49760.0 | 58575.9 | 67886.1 | 83336.3 | 98050.2  |
| 3243.6            | 31372.0 | 39535.3 | 49824.4 | 58656.2 | 68007.4 | 83384.4 | 98091.3  |
| 3252.1            | 31428.8 | 39569.6 | 49853.7 | 58744.0 | 68031.1 | 83544.9 | 98116.1  |
| 3374.0            | 31431.7 | 39570.8 | 49918.5 | 58760.1 | 68049.2 | 83614.1 | 98678.5  |
| 4091.9            | 31493.5 | 39579.8 | 50010.0 | 58786.4 | 68143.8 | 83711.2 | 98819.3  |
| 5316.7            | 31520.0 | 39593.4 | 50072.8 | 58814.7 | 68177.4 | 83735.4 | 99000.5  |
| 5330.8            | 31532.1 | 39645.9 | 50117.6 | 58823.5 | 68220.5 | 83860.9 | 99047.7  |
| 5354.9            | 31542.0 | 39668.6 | 50309.4 | 58834.5 | 68243.8 | 83876.7 | 99237.9  |
| 5488.6            | 31606.2 | 39684.2 | 51335.3 | 58901.8 | 68412.7 | 83907.8 | 99307.9  |
| 5613.9            | 31619.8 | 40134.3 | 51582.0 | 58973.4 | 69061.7 | 83919.0 | 99496.8  |
| 6060.5            | 31797.6 | 40151.1 | 51621.8 | 59059.2 | 70001.1 | 83974.4 | 99526.2  |
| 6988.7            | 31874.6 | 40156.4 | 51686.8 | 59130.5 | 70279.1 | 84037.7 | 99558.0  |
| 7029.0            | 31992.0 | 40287.7 | 51701.4 | 59160.7 | 70339.4 | 84079.7 | 99579.3  |
| 7104.2            | 32200.7 | 40304.6 | 51804.5 | 59163.4 | 70345.1 | 84082.9 | 99653.0  |
| 7271.8            | 32314.7 | 40363.6 | 51810.6 | 59189.5 | 70376.5 | 84124.4 | 99662.3  |
| 7672.5            | 32328.8 | 40387.5 | 51842.7 | 59217.4 | 70566.4 | 84131.3 | 99673.1  |
| 8224.5            | 32397.4 | 40416.1 | 51848.5 | 59279.4 | 70708.0 | 84173.3 | 99680.9  |
| 8250.3            | 32444.0 | 40563.4 | 51865.6 | 59305.9 | 70897.4 | 84473.9 | 100284.8 |
| 8303.6            | 32487.2 | 40590.5 | 51923.3 | 59317.5 | 71193.6 | 84513.9 | 100288.8 |
| 8317.1            | 32514.8 | 40603.2 | 51931.4 | 59389.8 | 71261.8 | 84525.2 | 100316.2 |
| 8384.4            | 32692.2 | 40699.7 | 51960.7 | 59426.2 | 71274.2 | 84557.6 | 100370.5 |
| 8433.5            | 32779.4 | 40765.2 | 52011.8 | 59467.1 | 71285.7 | 84572.3 | 100433.3 |
| 8489.0            | 32881.5 | 40981.8 | 52013.1 | 59495.5 | 71297.1 | 84592.1 | 100463.0 |
| 8567.5            | 32893.1 | 40987.8 | 52073.0 | 59506.2 | 71316.0 | 84798.1 | 100472.8 |
| 8694.7            | 32912.5 | 41370.7 | 52086.5 | 59555.5 | 71336.3 | 84896.0 | 100660.1 |
| 9052.4            | 32967.9 | 41616.5 | 52096.7 | 59564.4 | 71341.5 | 84988.0 | 100702.4 |
| 9230.7            | 33158.2 | 41892.2 | 52142.6 | 59584.7 | 71606.1 | 85901.1 | 101019.1 |
| 9363.5            | 33209.1 | 42034.3 | 52163.6 | 59597.9 | 71674.6 | 86563.5 | 101216.4 |
| 9705.9            | 33216.8 | 43012.0 | 52182.5 | 59640.5 | 71782.2 | 86591.3 | 102662.2 |
| 9799.2            | 33252.0 | 43103.6 | 52184.2 | 59661.0 | 71788.3 | 86686.5 | 102770.4 |
| 9857.2            | 33595.8 | 43145.1 | 52277.9 | 59661.8 | 71809.2 | 86756.1 | 102847.0 |
| 9894.1            | 33694.7 | 43276.5 | 52290.6 | 59702.8 | 71817.9 | 87908.9 | 102974.0 |
| 9898.4            | 33720.0 | 43463.6 | 52308.8 | 59721.6 | 71853.9 | 88313.6 | 103938.5 |

Supporting Information

|         |         |         |         |         |         |         |          |
|---------|---------|---------|---------|---------|---------|---------|----------|
| 10218.1 | 33768.8 | 43492.6 | 52342.2 | 59757.0 | 71880.9 | 88523.2 | 103961.2 |
| 11344.4 | 33833.0 | 43536.6 | 52486.9 | 59786.6 | 71899.2 | 88621.6 | 104125.7 |
| 11369.4 | 33850.7 | 43607.1 | 52490.9 | 59864.0 | 72618.3 | 88673.7 | 104182.0 |
| 11537.3 | 33851.9 | 43608.0 | 52542.4 | 59876.2 | 72721.0 | 88695.5 | 104195.8 |
| 11633.6 | 33892.2 | 43714.2 | 52571.6 | 59925.1 | 73944.6 | 88799.8 | 104284.7 |
| 12596.6 | 33982.0 | 43738.6 | 52650.7 | 59939.1 | 74119.6 | 88856.1 | 104454.5 |
| 12719.1 | 34006.0 | 43800.9 | 52724.4 | 59954.6 | 74223.7 | 88871.3 | 104527.0 |
| 12806.5 | 34293.5 | 43899.4 | 52741.3 | 60277.2 | 74443.7 | 88896.5 | 104627.3 |
| 13469.4 | 34500.8 | 43963.9 | 52901.3 | 60334.2 | 74504.5 | 89218.0 | 104847.2 |
| 13559.7 | 34550.2 | 44028.3 | 52962.8 | 60352.5 | 74532.0 | 89295.3 | 105020.6 |
| 14009.1 | 34637.2 | 44070.3 | 53133.3 | 60389.9 | 74548.1 | 89558.4 | 106018.8 |
| 22374.1 | 34644.3 | 44080.2 | 53273.6 | 60480.5 | 74551.2 | 89732.9 | 106041.1 |
| 22431.8 | 34644.6 | 44228.4 | 54036.8 | 60528.3 | 74599.1 | 90180.5 | 106382.1 |
| 22555.1 | 34696.1 | 44443.0 | 54067.0 | 60612.1 | 74633.7 | 90490.1 | 107183.2 |
| 22822.1 | 34742.1 | 44707.1 | 54150.2 | 61010.7 | 74687.0 | 90799.6 | 107434.5 |
| 23295.3 | 34797.8 | 44715.3 | 54183.7 | 61058.1 | 74704.3 | 90974.9 | 107551.5 |
| 24112.6 | 34807.4 | 44901.5 | 54201.1 | 61142.7 | 74720.3 | 91051.1 | 107692.7 |
| 24137.8 | 34839.5 | 45075.7 | 54226.7 | 61198.2 | 74727.1 | 91095.9 | 107752.5 |
| 24176.5 | 34855.8 | 45470.3 | 54339.0 | 61273.0 | 74737.7 | 91574.4 | 109614.2 |
| 24183.9 | 34930.7 | 45485.4 | 54392.2 | 61299.7 | 74775.5 | 92027.8 | 110154.3 |
| 24275.4 | 34963.8 | 45624.9 | 54403.6 | 61396.2 | 74789.0 | 92091.9 | 115063.5 |
| 24283.1 | 35339.9 | 45641.0 | 54643.8 | 61416.3 | 74803.2 | 92199.7 | 115616.7 |
| 24703.2 | 35447.4 | 45686.2 | 54671.3 | 61521.0 | 74823.1 | 92265.6 | 115813.8 |
| 24824.0 | 35514.0 | 45695.9 | 54710.0 | 61541.4 | 75007.4 | 92291.4 | 115914.0 |
| 24889.4 | 35557.1 | 45701.6 | 54763.6 | 61639.4 | 75049.4 | 92373.1 | 115958.6 |
| 24934.5 | 35568.6 | 45844.7 | 54779.9 | 61649.3 | 75159.8 | 92483.9 | 115984.1 |
| 25025.1 | 35599.8 | 45890.2 | 54797.1 | 61664.6 | 75190.1 | 92684.0 | 115998.3 |
| 25081.4 | 35631.8 | 45906.7 | 54798.5 | 61688.9 | 75198.5 | 92975.3 | 116120.9 |
| 25135.3 | 35668.6 | 45971.3 | 54900.3 | 62007.9 | 75279.6 | 93044.6 | 116441.5 |
| 25200.2 | 35685.2 | 45976.8 | 54919.3 | 62123.5 | 75311.3 | 93060.7 | 116458.9 |
| 26665.0 | 35757.5 | 45984.4 | 55013.2 | 62182.5 | 75403.9 | 93184.8 | 116768.5 |
| 26722.3 | 35802.1 | 46033.1 | 55033.8 | 62199.8 | 75406.2 | 93406.3 | 116997.3 |
| 26838.4 | 35852.9 | 46042.6 | 55055.9 | 62260.2 | 75431.1 | 93436.3 | 117045.9 |
| 26902.9 | 35933.1 | 46082.8 | 55098.0 | 62302.9 | 75470.1 | 93493.5 | 117199.4 |
| 27143.4 | 36048.9 | 46162.1 | 55180.6 | 62316.9 | 75528.8 | 93533.9 | 117295.5 |
| 27269.5 | 36123.1 | 46197.4 | 55214.4 | 62408.2 | 77041.9 | 93538.9 | 117341.2 |
| 27336.4 | 36193.3 | 46201.4 | 55331.9 | 62431.8 | 77350.1 | 93544.0 | 117366.7 |
| 27395.8 | 36243.3 | 46227.0 | 55343.7 | 62490.0 | 77573.3 | 93607.5 | 117390.3 |
| 27439.7 | 36270.9 | 46255.8 | 55419.3 | 62558.3 | 77809.8 | 93626.2 | 117576.5 |
| 27496.3 | 36301.3 | 46314.7 | 55454.4 | 62668.5 | 77903.5 | 93635.8 | 118154.7 |
| 27620.9 | 36322.6 | 46370.9 | 55496.5 | 62733.4 | 78005.5 | 93673.7 | 122859.0 |
| 27961.6 | 36797.5 | 46564.6 | 55523.1 | 62876.4 | 78120.6 | 93743.8 | 122949.6 |
| 27987.5 | 36824.2 | 46652.5 | 55588.7 | 62890.0 | 78138.2 | 93830.8 | 123708.7 |
| 28051.1 | 36850.6 | 46744.2 | 55604.9 | 62926.6 | 78185.6 | 93879.6 | 125903.5 |
| 28146.9 | 36921.2 | 46760.0 | 55626.2 | 62947.1 | 78686.4 | 93901.2 | 125943.3 |
| 28321.9 | 36946.7 | 46794.2 | 55709.7 | 63078.9 | 79021.2 | 93916.4 | 126504.9 |
| 28345.4 | 36999.0 | 46880.7 | 55719.8 | 63193.8 | 79215.0 | 94464.2 | 126971.6 |
| 28439.6 | 37004.0 | 46923.4 | 55768.3 | 63202.1 | 79232.7 | 94601.6 | 131337.7 |
| 28540.7 | 37102.3 | 46928.4 | 55907.8 | 63358.0 | 79256.8 | 94623.8 | 131408.1 |
| 28622.8 | 37114.5 | 46970.5 | 55929.6 | 63509.3 | 79260.8 | 94641.4 | 131569.0 |
| 28761.3 | 37121.6 | 46988.3 | 55997.9 | 63598.3 | 79295.5 | 94650.8 | 131769.9 |
| 28763.2 | 37226.1 | 46995.2 | 56001.6 | 63799.0 | 79297.5 | 95054.2 | 131872.3 |
| 28817.5 | 37440.9 | 46999.7 | 56071.3 | 63908.1 | 79471.8 | 95086.0 | 132997.9 |
| 28851.0 | 37525.9 | 47037.6 | 56091.4 | 63910.1 | 79484.6 | 95389.2 | 133536.4 |
| 28962.7 | 37594.2 | 47046.3 | 56171.1 | 63942.9 | 79647.9 | 95558.5 | 134082.8 |
| 29013.2 | 37600.6 | 47092.5 | 56213.4 | 63960.4 | 79660.3 | 95593.3 | 134234.5 |
| 29155.1 | 37618.7 | 47113.6 | 56241.5 | 63960.9 | 79719.8 | 95685.9 | 134525.0 |
| 29163.1 | 37623.5 | 47133.2 | 56323.9 | 64075.7 | 79842.5 | 95720.9 | 134700.4 |
| 29204.5 | 37645.2 | 47179.2 | 56368.0 | 64091.4 | 79906.7 | 95861.5 | 135661.5 |
| 29254.8 | 37673.0 | 47227.0 | 56461.0 | 64112.9 | 79927.8 | 95898.0 | 136477.4 |
| 29262.0 | 37687.0 | 47258.8 | 56472.4 | 64119.6 | 80046.8 | 95931.2 | 136595.0 |
| 29283.0 | 37716.7 | 47275.7 | 56509.7 | 64218.3 | 80358.0 | 96006.3 | 136669.4 |
| 29327.7 | 37734.7 | 47295.2 | 56685.0 | 64245.3 | 80436.0 | 96050.8 | 137050.0 |
| 29381.2 | 37745.4 | 47307.0 | 56789.8 | 64257.6 | 80439.0 | 96116.1 | 137348.3 |
| 29400.3 | 37775.8 | 47341.0 | 56799.2 | 64290.7 | 80752.6 | 96331.0 | 137518.6 |
| 29445.0 | 37847.8 | 47401.5 | 56835.2 | 64302.6 | 80959.9 | 96364.2 | 140124.3 |
| 29506.8 | 37868.4 | 47410.0 | 56867.8 | 64323.7 | 81133.2 | 96392.8 | 140146.4 |
| 29572.7 | 37981.2 | 47419.9 | 56903.5 | 64384.9 | 81285.7 | 96406.9 | 140446.4 |
| 29631.9 | 38004.0 | 47421.0 | 56934.1 | 64398.4 | 81361.7 | 96410.4 | 140788.1 |
| 29765.5 | 38025.0 | 47432.7 | 57040.9 | 64655.7 | 81372.1 | 96423.6 | 141057.2 |
| 29788.2 | 38034.1 | 47434.5 | 57046.6 | 64686.8 | 81374.8 | 96431.1 | 159999.7 |
| 29946.4 | 38215.2 | 47439.9 | 57274.0 | 64716.2 | 81383.7 | 96472.8 | 160849.3 |
| 29948.5 | 38228.5 | 47460.9 | 57776.3 | 64744.8 | 81396.8 | 96519.4 | 161165.6 |
| 29961.7 | 38271.0 | 47521.9 | 57790.2 | 64791.3 | 81636.1 | 96544.9 | 163580.5 |
| 30039.3 | 38282.7 | 47563.0 | 57890.2 | 64828.5 | 81676.2 | 96713.0 | 163658.2 |
| 30047.7 | 38358.5 | 47618.6 | 57890.7 | 65126.9 | 81738.0 | 97119.7 | 163960.5 |
| 30092.6 | 38473.6 | 47645.5 | 57943.7 | 65286.9 | 81985.5 | 97212.8 | 164012.7 |

## Supporting Information

|         |         |         |         |         |         |         |          |
|---------|---------|---------|---------|---------|---------|---------|----------|
| 30111.4 | 39081.0 | 47806.5 | 58002.7 | 65306.9 | 82047.7 | 97269.7 | 164350.7 |
| 30142.9 | 39132.2 | 47925.0 | 58047.6 | 65362.1 | 82078.8 | 97293.6 | 165306.8 |
| 30221.8 | 39138.3 | 48632.9 | 58113.4 | 65398.9 | 82086.9 | 97315.4 | 166776.5 |
| 30266.2 | 39223.9 | 48727.1 | 58241.7 | 65456.5 | 82159.6 | 97369.8 | 166984.6 |
| 30422.0 | 39232.4 | 48758.1 | 58249.8 | 65570.2 | 82169.9 | 97400.7 | 167170.6 |
| 30473.7 |         |         |         |         |         |         |          |

**Table S28:** CASSCF computed 21 roots of sextet (red) along with 224 roots of quartet and 490 roots of doublet states for  $[\text{Dy}(\text{C}_8\text{H}_8)_2]^-$  complex. All the values are reported herein  $\text{cm}^{-1}$ .

| 5                |         |         |         |         |          |  |
|------------------|---------|---------|---------|---------|----------|--|
| Spin free States |         |         |         |         |          |  |
| CASSCF           |         |         |         |         |          |  |
| 1.0              | 36444.9 | 46510.5 | 56693.2 | 79076.4 | 97229.2  |  |
| 74.9             | 36573.7 | 46510.5 | 56696.9 | 79083.6 | 97286.8  |  |
| 75.0             | 36573.7 | 46776.5 | 56818.1 | 79083.6 | 97286.9  |  |
| 115.3            | 36621.0 | 46776.5 | 56818.2 | 79109.9 | 97708.3  |  |
| 136.5            | 36621.0 | 46880.2 | 56953.7 | 79110.0 | 98005.8  |  |
| 137.0            | 36765.6 | 46880.3 | 56954.3 | 79115.5 | 98011.4  |  |
| 156.2            | 36766.5 | 47088.9 | 57160.9 | 79115.5 | 98040.6  |  |
| 162.7            | 36816.9 | 47089.0 | 57161.1 | 79313.8 | 98040.7  |  |
| 1157.3           | 36819.8 | 47179.6 | 58248.3 | 79313.8 | 100448.2 |  |
| 1157.3           | 36822.6 | 47179.6 | 58248.3 | 79488.6 | 100448.2 |  |
| 7345.4           | 36842.4 | 47205.5 | 58552.8 | 79488.6 | 100458.3 |  |
| 7345.4           | 36842.4 | 47209.8 | 58552.8 | 79695.6 | 100458.3 |  |
| 7537.7           | 36845.6 | 47255.0 | 58557.2 | 79695.6 | 100480.9 |  |
| 7538.1           | 36876.0 | 47640.2 | 58635.2 | 79802.2 | 100481.1 |  |
| 7752.5           | 36876.0 | 47640.2 | 58636.8 | 79803.2 | 100502.9 |  |
| 7754.8           | 37102.3 | 47806.6 | 58732.7 | 79805.0 | 100503.2 |  |
| 7949.3           | 37265.3 | 47817.0 | 58733.5 | 79806.8 | 100512.3 |  |
| 33966.9          | 37266.0 | 47823.3 | 58749.5 | 79807.4 | 100514.8 |  |
| 33977.5          | 37464.4 | 47859.1 | 58749.6 | 79808.7 | 100515.4 |  |
| 34829.5          | 37464.4 | 47859.5 | 58959.8 | 79810.6 | 100631.5 |  |
| 24085.3          | 37548.5 | 47920.3 | 58959.8 | 79811.9 | 100631.5 |  |
| 24085.4          | 37549.6 | 47920.8 | 59366.0 | 79812.4 | 101890.4 |  |
| 24091.9          | 37845.5 | 47943.6 | 59368.9 | 79825.3 | 101890.4 |  |
| 24091.9          | 37845.6 | 47943.6 | 59702.0 | 79825.4 | 101950.9 |  |
| 24172.1          | 37897.5 | 47996.6 | 59722.5 | 83996.8 | 101951.1 |  |
| 24172.3          | 37897.6 | 47996.6 | 59772.4 | 83996.8 | 102177.8 |  |
| 24178.2          | 37982.3 | 48071.2 | 59772.6 | 84618.7 | 102177.8 |  |
| 24178.2          | 37982.6 | 48071.2 | 59815.2 | 84626.2 | 102220.1 |  |
| 24277.0          | 38162.7 | 48091.7 | 59817.5 | 84697.6 | 102220.2 |  |
| 24277.4          | 38162.7 | 48091.7 | 60021.5 | 85061.8 | 102485.6 |  |
| 24311.3          | 38190.9 | 48117.5 | 60021.5 | 85114.7 | 102490.4 |  |
| 24311.3          | 38190.9 | 48117.5 | 60816.1 | 85114.7 | 102593.6 |  |
| 24440.5          | 38352.0 | 50558.9 | 60816.1 | 85241.0 | 104565.0 |  |
| 24440.5          | 38352.5 | 50558.9 | 61313.6 | 85242.0 | 104565.1 |  |
| 24486.9          | 38408.7 | 50724.9 | 61313.6 | 85468.8 | 104696.9 |  |
| 24616.2          | 38642.7 | 50795.8 | 61505.5 | 85469.3 | 104697.1 |  |
| 24616.2          | 38642.7 | 50795.9 | 61535.1 | 85546.7 | 104834.7 |  |
| 24641.3          | 41146.5 | 50967.6 | 61539.1 | 85546.7 | 104834.7 |  |
| 24641.3          | 41146.5 | 50967.7 | 61587.5 | 86089.3 | 105093.7 |  |
| 24688.6          | 41271.7 | 51191.1 | 61587.5 | 86089.3 | 105098.2 |  |
| 24688.6          | 41271.7 | 51191.2 | 61617.4 | 86390.4 | 105219.7 |  |
| 24697.4          | 41373.2 | 51220.0 | 61617.5 | 86390.4 | 105760.1 |  |
| 24700.0          | 41377.1 | 51220.0 | 61705.5 | 86463.0 | 105760.4 |  |
| 24729.6          | 41407.1 | 51376.7 | 61705.7 | 86463.0 | 105806.2 |  |
| 24729.7          | 41407.1 | 51376.7 | 61722.0 | 86757.8 | 105806.2 |  |
| 24892.2          | 41442.6 | 51661.5 | 61722.1 | 86757.8 | 106261.4 |  |
| 24892.6          | 41543.0 | 51661.6 | 63121.0 | 86991.2 | 106261.5 |  |
| 24899.9          | 41543.0 | 51706.0 | 63348.2 | 86991.6 | 106630.5 |  |
| 24955.9          | 41621.6 | 51706.0 | 63349.7 | 87077.0 | 106637.5 |  |
| 24956.4          | 41621.6 | 51707.6 | 63416.5 | 87079.6 | 106758.9 |  |
| 24992.1          | 41659.3 | 51707.6 | 63416.7 | 87087.5 | 109606.9 |  |
| 24992.1          | 41659.3 | 51740.7 | 63489.6 | 87089.8 | 109634.6 |  |
| 25025.2          | 41684.6 | 51740.7 | 63489.6 | 87091.0 | 109639.0 |  |
| 25025.2          | 41684.6 | 51778.2 | 66010.3 | 87091.0 | 109745.5 |  |
| 25155.5          | 41721.8 | 51778.3 | 66650.1 | 87094.4 | 109745.5 |  |
| 25155.5          | 41722.0 | 51922.8 | 66650.1 | 87330.2 | 110169.7 |  |
| 25294.7          | 41783.0 | 51922.8 | 66832.3 | 87386.8 | 110170.0 |  |
| 25299.1          | 41783.1 | 52024.3 | 66842.8 | 87391.8 | 113913.3 |  |
| 25393.6          | 41856.1 | 52027.4 | 67084.9 | 87449.9 | 113922.0 |  |
| 25527.7          | 41863.0 | 52061.6 | 67085.0 | 87450.0 | 114655.4 |  |
| 25805.4          | 41904.4 | 54348.3 | 67169.6 | 87509.2 | 118906.8 |  |
| 25810.5          | 41990.4 | 54348.4 | 67171.0 | 87509.3 | 118906.8 |  |
| 25847.3          | 42073.0 | 54363.4 | 67172.0 | 87561.7 | 119416.8 |  |

## Supporting Information

|         |         |         |         |         |          |
|---------|---------|---------|---------|---------|----------|
| 25847.3 | 42076.8 | 54363.5 | 67173.6 | 87562.6 | 119416.8 |
| 25928.2 | 42238.5 | 54447.9 | 67179.8 | 92799.1 | 119669.3 |
| 25928.5 | 42238.5 | 54448.7 | 67201.4 | 92799.1 | 119669.3 |
| 26087.9 | 42255.9 | 54624.0 | 67201.5 | 92915.0 | 119822.9 |
| 26087.9 | 42302.9 | 54627.7 | 68899.9 | 92915.7 | 119822.9 |
| 29041.0 | 42303.3 | 54792.2 | 68899.9 | 93003.5 | 119920.5 |
| 29055.3 | 42340.5 | 54819.9 | 68951.9 | 93003.5 | 119920.7 |
| 29055.6 | 42341.2 | 54819.9 | 68951.9 | 93034.5 | 119985.4 |
| 29055.6 | 42359.0 | 55116.4 | 68994.5 | 94629.4 | 119985.9 |
| 29057.6 | 42359.1 | 55116.4 | 68994.5 | 94635.6 | 120025.1 |
| 29094.4 | 42540.8 | 55176.3 | 68997.5 | 94638.2 | 120033.2 |
| 29094.5 | 42540.8 | 55176.3 | 68998.2 | 94744.3 | 120045.6 |
| 29100.6 | 42553.2 | 55192.4 | 68999.2 | 94744.3 | 121981.2 |
| 29100.6 | 42553.2 | 55212.3 | 69003.6 | 94893.5 | 122056.3 |
| 29136.4 | 42624.9 | 55215.5 | 69003.6 | 94893.5 | 122063.5 |
| 29136.8 | 42625.0 | 55261.9 | 69007.9 | 94929.5 | 122644.5 |
| 29156.8 | 42748.1 | 55262.0 | 69008.3 | 94929.7 | 122644.5 |
| 29156.9 | 42748.8 | 55265.5 | 69045.7 | 94998.9 | 131329.4 |
| 29280.7 | 42791.7 | 55265.5 | 69045.7 | 94999.0 | 131329.6 |
| 29280.7 | 42792.2 | 55318.1 | 70239.8 | 95342.0 | 131544.2 |
| 30313.3 | 42862.7 | 55318.1 | 70241.1 | 95342.0 | 131544.3 |
| 30313.3 | 42862.7 | 55343.9 | 70584.9 | 95704.9 | 132120.0 |
| 30445.4 | 42999.6 | 55343.9 | 71760.3 | 95704.9 | 132129.3 |
| 30449.6 | 42999.6 | 55603.9 | 71983.5 | 95763.9 | 132487.0 |
| 30449.9 | 43060.3 | 55603.9 | 71993.2 | 95768.5 | 139269.6 |
| 30476.6 | 43060.3 | 55687.3 | 72249.6 | 95787.6 | 139288.2 |
| 30476.6 | 43101.2 | 55687.3 | 72580.1 | 95814.5 | 139293.8 |
| 30548.5 | 43101.2 | 55815.8 | 72580.1 | 95815.0 | 139438.4 |
| 30548.5 | 43136.9 | 55828.9 | 72686.0 | 95943.4 | 139438.5 |
| 30665.7 | 43139.4 | 55829.4 | 72688.6 | 95943.4 | 139691.0 |
| 30665.7 | 43270.3 | 55901.1 | 72730.2 | 95958.3 | 139691.4 |
| 30730.2 | 44097.2 | 55901.1 | 72730.2 | 95958.3 | 139864.1 |
| 30730.2 | 44097.2 | 56006.7 | 75999.9 | 96019.1 | 139864.2 |
| 30778.7 | 44124.5 | 56007.0 | 76003.7 | 96019.4 | 141409.2 |
| 30778.7 | 44124.5 | 56027.2 | 76003.7 | 96028.5 | 142111.0 |
| 30817.7 | 44243.9 | 56038.3 | 76118.1 | 96029.9 | 142119.1 |
| 30817.7 | 44244.0 | 56038.3 | 76118.2 | 96033.2 | 145418.9 |
| 32188.4 | 44303.5 | 56075.4 | 76122.7 | 96037.7 | 145419.0 |
| 32189.8 | 44303.6 | 56079.6 | 76122.8 | 96038.0 | 145482.4 |
| 32399.0 | 44334.0 | 56088.3 | 76188.4 | 96059.8 | 145482.5 |
| 32399.0 | 44334.4 | 56088.4 | 76188.6 | 96059.8 | 145573.5 |
| 32695.3 | 44343.0 | 56109.7 | 76200.2 | 96067.6 | 145573.6 |
| 33776.8 | 44343.0 | 56109.8 | 76208.2 | 96068.0 | 145807.8 |
| 33809.4 | 44384.2 | 56134.8 | 76209.6 | 96291.9 | 145811.2 |
| 33809.7 | 44384.2 | 56134.8 | 77502.5 | 96291.9 | 145899.4 |
| 33813.2 | 44414.6 | 56190.7 | 77506.7 | 96637.0 | 146221.8 |
| 33813.2 | 44414.6 | 56191.2 | 77577.1 | 96637.0 | 146221.8 |
| 33847.9 | 44447.6 | 56251.0 | 77577.3 | 96911.0 | 173526.2 |
| 33848.4 | 44448.2 | 56251.0 | 77694.2 | 96951.9 | 173526.3 |
| 33939.8 | 44508.6 | 56357.9 | 78181.7 | 96952.1 | 174708.4 |
| 33939.8 | 44558.0 | 56373.5 | 78182.5 | 96966.5 | 174710.8 |
| 33988.2 | 44558.1 | 56379.7 | 78836.3 | 96971.2 | 174713.8 |
| 33988.2 | 44626.0 | 56483.2 | 78882.0 | 97005.8 | 176989.4 |
| 36206.1 | 44745.3 | 56483.3 | 78884.2 | 97005.8 | 176990.3 |
| 36206.1 | 44750.2 | 56489.5 | 78987.6 | 97099.5 | 177024.9 |
| 36287.7 | 44813.5 | 56489.6 | 78987.7 | 97099.6 | 177025.0 |
| 36287.7 | 45478.6 | 56629.1 | 78994.8 | 97219.4 | 177244.5 |
| 36298.2 | 45478.7 | 56679.3 | 78994.8 | 97219.5 | 177487.9 |
| 36298.2 | 45503.0 | 56679.4 | 79076.3 | 97229.1 | 177495.8 |
| 36444.2 | 45507.9 |         |         |         |          |

**Table S29:** NEVPT2 computed 21 roots of sextet (red) along with 224 roots of quartet and 490 roots of doublet states for  $[\text{Dy}(\text{C}_8\text{H}_8)_2]^-$  complex. All the values are reported herein  $\text{cm}^{-1}$ .

| 5                |         |         |         |         |         |
|------------------|---------|---------|---------|---------|---------|
| Spin free States |         |         |         |         |         |
| NEVPT2           |         |         |         |         |         |
| 0.6              | 34841.7 | 44785.0 | 54609.4 | 74656.4 | 90848.1 |
| 13.9             | 34913.2 | 44785.2 | 54609.6 | 74801.9 | 90848.1 |
| 15.7             | 34913.4 | 44792.3 | 54669.2 | 74802.1 | 91062.1 |
| 60.7             | 35171.6 | 44792.3 | 54669.2 | 74864.0 | 91062.5 |
| 190.9            | 35171.8 | 44803.7 | 54766.0 | 74864.0 | 91068.3 |
| 199.4            | 36753.0 | 44808.6 | 54766.0 | 74895.8 | 91068.3 |
| 223.1            | 36753.0 | 44858.4 | 54790.2 | 74895.9 | 91149.7 |
| 224.7            | 36883.3 | 44885.4 | 54790.3 | 75339.7 | 91150.0 |
| 1507.9           | 36883.3 | 44885.4 | 55299.6 | 75348.1 | 93039.8 |



## Supporting Information

|         |         |         |         |         |          |
|---------|---------|---------|---------|---------|----------|
| 1507.9  | 36932.9 | 48704.2 | 55299.6 | 75352.9 | 93039.8  |
| 6104.7  | 36932.9 | 48704.3 | 55339.1 | 76077.9 | 93056.1  |
| 6105.2  | 37107.2 | 48822.8 | 55339.3 | 76077.9 | 93056.4  |
| 6371.3  | 37108.6 | 48822.8 | 55547.7 | 76293.2 | 93078.7  |
| 6372.0  | 37309.3 | 49029.8 | 55649.0 | 76293.2 | 93078.8  |
| 6656.3  | 37309.3 | 49129.2 | 55649.0 | 76523.8 | 93117.6  |
| 6658.8  | 37369.1 | 49129.4 | 55677.7 | 76523.8 | 93117.7  |
| 6896.6  | 37369.3 | 49354.5 | 55678.7 | 76640.7 | 93137.1  |
| 28640.8 | 37374.4 | 49354.6 | 55780.7 | 76640.7 | 93139.9  |
| 28652.4 | 37374.4 | 49553.3 | 55785.7 | 76731.2 | 93141.6  |
| 29654.7 | 37433.4 | 49553.3 | 55787.5 | 76749.2 | 93321.7  |
| 22850.7 | 37433.4 | 49648.1 | 55787.7 | 76753.5 | 93321.7  |
| 22853.9 | 37499.5 | 49648.5 | 55829.7 | 76753.5 | 93892.6  |
| 23177.1 | 37500.1 | 49731.2 | 55831.3 | 76784.1 | 93893.0  |
| 23182.1 | 37602.3 | 49731.2 | 56167.9 | 76789.8 | 93931.1  |
| 23611.5 | 37604.0 | 49895.9 | 56611.0 | 76827.3 | 93931.5  |
| 23614.9 | 37698.5 | 49895.9 | 56611.4 | 76828.8 | 94031.8  |
| 23629.8 | 37712.8 | 50118.3 | 56627.5 | 76829.6 | 94032.3  |
| 23633.3 | 37712.8 | 50118.3 | 56627.6 | 76835.8 | 94251.7  |
| 23635.2 | 37809.9 | 50207.2 | 56650.7 | 76866.3 | 94251.8  |
| 23635.3 | 37809.9 | 50227.9 | 56932.8 | 78485.3 | 94272.5  |
| 23650.2 | 37816.4 | 50233.9 | 56932.9 | 78543.4 | 94272.9  |
| 23653.9 | 37816.4 | 50285.9 | 57182.8 | 78543.4 | 94279.0  |
| 23654.0 | 38051.0 | 50286.4 | 57182.8 | 78772.7 | 94279.0  |
| 23808.2 | 38051.3 | 50385.5 | 57774.2 | 78773.9 | 94340.7  |
| 23871.0 | 38125.6 | 50386.4 | 57774.2 | 78957.6 | 94342.2  |
| 23873.9 | 38398.7 | 50508.3 | 57925.9 | 78957.6 | 94599.1  |
| 24085.0 | 38398.7 | 50508.7 | 57977.6 | 78995.8 | 94604.9  |
| 24323.6 | 38415.8 | 50512.8 | 57982.0 | 78996.9 | 94684.4  |
| 24323.6 | 38420.3 | 50512.8 | 58106.1 | 79219.3 | 94689.9  |
| 24378.9 | 38488.8 | 50630.5 | 58106.2 | 79219.4 | 94739.1  |
| 24381.7 | 39207.9 | 50630.5 | 58115.5 | 79698.9 | 94846.2  |
| 24382.0 | 39305.4 | 50681.3 | 58115.6 | 79698.9 | 96129.8  |
| 24383.2 | 39310.7 | 50681.5 | 58256.1 | 79957.6 | 96130.7  |
| 24389.2 | 39619.6 | 50697.8 | 58256.5 | 80064.2 | 96363.0  |
| 24389.8 | 39620.3 | 50697.8 | 58299.1 | 80069.2 | 96363.2  |
| 24635.8 | 39746.6 | 50712.7 | 58299.4 | 80183.8 | 96814.0  |
| 24635.8 | 39747.1 | 50712.7 | 58425.4 | 80184.4 | 96814.0  |
| 24975.1 | 40298.5 | 50779.8 | 58812.5 | 80259.8 | 97298.1  |
| 24975.1 | 40298.6 | 50779.9 | 58814.2 | 80260.1 | 97305.9  |
| 25743.5 | 40385.7 | 50805.1 | 58849.2 | 80302.0 | 97436.9  |
| 25743.5 | 40387.4 | 50805.1 | 58849.9 | 80302.0 | 100211.5 |
| 25933.0 | 40857.8 | 50817.4 | 58998.7 | 80327.2 | 100261.3 |
| 25933.0 | 40860.2 | 50817.7 | 58998.7 | 80329.0 | 100266.7 |
| 26377.0 | 40943.7 | 50870.5 | 59808.7 | 80525.2 | 100401.7 |
| 26377.0 | 41017.8 | 50870.5 | 60808.6 | 80525.2 | 100401.9 |
| 26378.8 | 42132.8 | 51056.3 | 60821.1 | 81007.6 | 100945.3 |
| 26383.3 | 42133.0 | 51056.4 | 62728.1 | 81007.6 | 100945.9 |
| 26528.3 | 42228.0 | 51227.4 | 62728.1 | 81310.2 | 103789.2 |
| 26528.7 | 42232.8 | 51231.7 | 63292.2 | 81311.1 | 103798.9 |
| 26773.5 | 42326.3 | 51288.5 | 63292.4 | 81396.6 | 104638.5 |
| 26773.5 | 42326.5 | 51560.7 | 63330.7 | 81397.7 | 109695.9 |
| 27132.7 | 42380.7 | 51561.1 | 63334.0 | 81405.6 | 109695.9 |
| 27132.7 | 42380.9 | 51641.1 | 63341.8 | 81406.4 | 110319.7 |
| 27163.0 | 42385.6 | 51642.2 | 63345.7 | 81406.9 | 110319.7 |
| 27169.0 | 42385.6 | 51817.5 | 63362.8 | 84632.2 | 110582.7 |
| 27169.6 | 42449.5 | 51819.1 | 63411.0 | 84632.3 | 110582.8 |
| 27238.5 | 42450.1 | 51890.2 | 63411.2 | 84775.7 | 110701.2 |
| 27249.9 | 42537.9 | 51908.0 | 64992.9 | 84776.4 | 110750.9 |
| 29207.9 | 42538.0 | 51914.4 | 65170.1 | 84873.6 | 110751.5 |
| 29231.8 | 42561.4 | 51956.0 | 65170.8 | 84873.9 | 110785.0 |
| 29231.8 | 42561.4 | 51956.0 | 65208.5 | 84943.3 | 110793.8 |
| 29237.4 | 42583.0 | 51967.7 | 65219.6 | 87086.4 | 110866.9 |
| 29239.9 | 42583.4 | 51972.4 | 65649.1 | 87090.6 | 110867.4 |
| 29306.8 | 42615.8 | 52075.2 | 65737.4 | 87093.7 | 110954.9 |
| 29306.8 | 42616.5 | 52080.1 | 65737.4 | 87161.7 | 110955.8 |
| 29345.8 | 42705.3 | 52263.5 | 65845.3 | 87162.5 | 111025.7 |
| 29345.8 | 42753.9 | 52467.1 | 65852.4 | 87259.6 | 111035.9 |
| 29388.0 | 42753.9 | 52472.8 | 65852.4 | 87259.6 | 111053.7 |
| 29388.7 | 42933.9 | 52588.1 | 65855.1 | 87418.8 | 111500.2 |
| 29446.9 | 42934.1 | 52589.5 | 65856.2 | 87418.8 | 111500.9 |
| 29447.1 | 43137.3 | 52644.9 | 65894.2 | 87554.7 | 118364.2 |
| 29508.6 | 43137.4 | 52749.3 | 65894.5 | 87555.1 | 118364.9 |
| 29510.3 | 43193.2 | 52756.9 | 65929.4 | 87637.1 | 118548.0 |
| 29582.4 | 43198.7 | 52880.0 | 65929.5 | 87637.2 | 118548.3 |
| 29582.4 | 43283.2 | 52880.7 | 65935.3 | 87757.4 | 119291.8 |
| 29793.1 | 43299.4 | 52881.5 | 65936.1 | 87763.5 | 119302.9 |

## Supporting Information

|         |         |         |         |         |          |
|---------|---------|---------|---------|---------|----------|
| 29793.2 | 43299.4 | 52882.8 | 65979.0 | 87791.4 | 119833.4 |
| 30230.4 | 43461.5 | 52931.8 | 65979.0 | 87796.8 | 127167.9 |
| 31110.1 | 43461.5 | 52931.9 | 66122.0 | 87798.1 | 127168.1 |
| 31110.1 | 43472.6 | 53454.0 | 66122.0 | 87976.2 | 127174.8 |
| 31283.3 | 43633.6 | 53454.1 | 66253.3 | 87977.1 | 127337.4 |
| 31283.6 | 43633.6 | 53588.3 | 66705.6 | 88027.5 | 127338.2 |
| 31285.5 | 43697.0 | 53589.9 | 66705.8 | 88487.0 | 127655.0 |
| 31312.4 | 43697.0 | 53638.3 | 66923.3 | 88487.0 | 127655.9 |
| 31312.4 | 43702.7 | 53638.7 | 66927.1 | 88544.4 | 127862.2 |
| 31408.1 | 43706.4 | 53686.3 | 68568.0 | 88549.2 | 127862.8 |
| 31408.1 | 43710.2 | 53686.4 | 69755.6 | 88587.6 | 127957.8 |
| 31581.2 | 43710.6 | 53731.0 | 69755.6 | 88587.9 | 128824.6 |
| 31581.6 | 43712.7 | 53743.6 | 69795.0 | 89336.9 | 128834.7 |
| 31679.4 | 43713.2 | 53749.9 | 69795.2 | 89336.9 | 132570.0 |
| 31679.4 | 43714.5 | 53749.9 | 69871.4 | 89402.0 | 132570.2 |
| 31751.0 | 43714.5 | 53757.0 | 69871.8 | 89402.0 | 132632.1 |
| 31751.0 | 43724.3 | 53757.0 | 69890.3 | 89806.9 | 132632.7 |
| 31805.4 | 43724.3 | 53847.2 | 69890.4 | 89807.0 | 132746.9 |
| 31805.4 | 43771.1 | 53847.5 | 69927.3 | 90034.0 | 132747.4 |
| 32491.4 | 43771.1 | 53876.8 | 69940.7 | 90043.0 | 133063.0 |
| 32576.7 | 43821.2 | 53881.3 | 69942.1 | 90051.2 | 133067.6 |
| 32576.7 | 43821.4 | 53903.8 | 70042.7 | 90051.4 | 133183.0 |
| 32588.5 | 43892.9 | 53904.6 | 70047.7 | 90091.9 | 133628.3 |
| 32588.8 | 43903.7 | 53915.7 | 70164.8 | 90093.9 | 133628.3 |
| 32639.1 | 44022.6 | 53915.9 | 70164.8 | 90113.2 | 156432.6 |
| 32639.9 | 44034.0 | 53948.1 | 70398.6 | 90113.2 | 156437.4 |
| 32792.4 | 44034.0 | 53948.6 | 71011.7 | 90148.1 | 157705.9 |
| 32792.4 | 44282.6 | 54158.9 | 71013.0 | 90149.2 | 157708.4 |
| 32877.3 | 44282.7 | 54158.9 | 74376.6 | 90157.3 | 157836.8 |
| 32877.4 | 44446.1 | 54197.2 | 74453.4 | 90338.0 | 159185.9 |
| 33593.3 | 44446.1 | 54229.0 | 74455.8 | 90338.0 | 159187.4 |
| 33750.3 | 44470.7 | 54229.0 | 74565.4 | 90492.8 | 159305.9 |
| 33754.2 | 44470.7 | 54297.6 | 74565.5 | 90608.4 | 159314.1 |
| 34308.4 | 44481.0 | 54297.6 | 74634.8 | 90610.6 | 159387.0 |
| 34308.5 | 44481.5 | 54343.1 | 74634.9 | 90783.0 | 160042.4 |
| 34593.8 | 44666.0 | 54345.8 | 74656.3 | 90783.0 | 160058.2 |
| 34840.4 | 44666.1 |         |         |         |          |

**Table S30:** CASSCF computed the spin-orbit states for  $[\text{Dy}(\text{C}_8\text{H}_8)_2]^-$  complex. All the values are reported here in  $\text{cm}^{-1}$ .

| 5                 |         |         |         |         |         |         |          |
|-------------------|---------|---------|---------|---------|---------|---------|----------|
| Spin Orbit States |         |         |         |         |         |         |          |
| CASSCF            |         |         |         |         |         |         |          |
| 0.0               | 30241.5 | 39740.4 | 49742.9 | 60402.4 | 69795.4 | 88903.4 | 104352.2 |
| 21.3              | 30351.7 | 39787.1 | 49790.0 | 60412.5 | 69824.1 | 89274.5 | 104360.9 |
| 48.7              | 31199.5 | 39789.0 | 49819.4 | 60439.3 | 70132.8 | 89493.9 | 104380.6 |
| 54.4              | 31227.8 | 39860.6 | 49900.7 | 60457.1 | 70428.6 | 89499.6 | 104717.7 |
| 74.4              | 31303.8 | 39896.2 | 50002.9 | 60462.6 | 70610.2 | 89570.1 | 105260.7 |
| 83.4              | 31344.8 | 39994.5 | 50118.6 | 60492.4 | 70702.9 | 89642.4 | 105299.2 |
| 283.9             | 31378.1 | 40012.3 | 50195.9 | 60747.4 | 71293.1 | 89661.4 | 105372.9 |
| 1069.5            | 31398.9 | 40056.6 | 50224.9 | 60871.9 | 71754.3 | 89697.0 | 105424.6 |
| 3030.0            | 31440.0 | 40097.3 | 50228.0 | 60897.5 | 71859.7 | 89828.1 | 105662.6 |
| 3049.0            | 31453.1 | 40155.7 | 50231.6 | 60901.7 | 71897.7 | 89904.5 | 105722.1 |
| 3072.8            | 31513.1 | 40159.9 | 50273.1 | 60918.5 | 71932.7 | 89911.9 | 105746.7 |
| 3086.0            | 31537.0 | 40175.7 | 50278.9 | 60985.3 | 71947.6 | 90209.2 | 105777.9 |
| 3172.5            | 31546.9 | 40205.3 | 50297.4 | 60994.8 | 72428.5 | 90234.0 | 105887.5 |
| 3329.4            | 31564.5 | 40292.8 | 50299.5 | 61075.1 | 73710.9 | 90250.2 | 106852.5 |
| 3805.9            | 31658.1 | 40298.8 | 50335.9 | 61098.7 | 73855.2 | 90310.9 | 106879.3 |
| 5233.7            | 31738.0 | 40298.9 | 50339.7 | 61218.4 | 74036.4 | 90491.6 | 106919.8 |
| 5240.8            | 31761.6 | 40401.5 | 50407.4 | 61251.8 | 74260.0 | 90546.2 | 106938.8 |
| 5276.6            | 31834.9 | 40406.3 | 50408.1 | 61282.6 | 74300.7 | 90721.9 | 106972.3 |
| 5399.0            | 31892.7 | 41382.3 | 50419.2 | 61312.0 | 74319.5 | 90768.4 | 107007.1 |
| 5557.6            | 32199.2 | 41523.3 | 50489.5 | 61321.7 | 74330.4 | 90848.4 | 107033.4 |
| 5851.7            | 32201.1 | 41564.1 | 50527.9 | 61330.0 | 74335.2 | 90876.7 | 108680.2 |
| 6938.4            | 32379.4 | 41611.7 | 50538.0 | 61434.2 | 74349.8 | 91060.0 | 108948.7 |
| 6961.4            | 32403.2 | 41653.4 | 50577.2 | 61451.7 | 74358.3 | 91161.3 | 108957.7 |
| 7037.4            | 32442.3 | 42153.2 | 50642.3 | 61457.5 | 74363.1 | 91190.6 | 108966.0 |
| 7224.1            | 32783.4 | 42214.2 | 50675.7 | 61485.9 | 74372.2 | 91196.4 | 108978.1 |
| 7504.9            | 33046.9 | 42253.1 | 50741.6 | 61513.4 | 74392.6 | 91240.4 | 109083.3 |
| 8266.2            | 33118.9 | 42291.3 | 50810.0 | 61543.5 | 74393.0 | 91266.0 | 109124.7 |
| 8275.5            | 33119.2 | 42311.7 | 50931.3 | 61545.9 | 74423.4 | 91279.4 | 109189.0 |
| 8446.9            | 33221.8 | 42345.8 | 50998.4 | 61563.3 | 74451.5 | 91293.8 | 109340.2 |
| 8862.0            | 33294.3 | 42377.0 | 51020.0 | 61606.1 | 74492.3 | 91308.4 | 109389.0 |
| 9235.8            | 33299.9 | 42419.5 | 51033.1 | 61638.2 | 74678.5 | 91329.1 | 109510.3 |
| 9266.5            | 33320.3 | 42420.2 | 51516.3 | 61671.4 | 74710.0 | 91378.2 | 109678.4 |

## Supporting Information

|         |         |         |         |         |         |          |          |
|---------|---------|---------|---------|---------|---------|----------|----------|
| 9374.4  | 33354.7 | 42450.2 | 51647.7 | 61720.6 | 74958.2 | 91409.7  | 109802.0 |
| 9421.2  | 33361.9 | 42483.1 | 51659.3 | 61754.6 | 74959.1 | 91440.8  | 109813.6 |
| 9491.2  | 33373.2 | 42611.2 | 51724.2 | 61781.1 | 74967.8 | 91493.9  | 109928.2 |
| 9537.8  | 33417.4 | 42615.9 | 51938.5 | 61802.9 | 74999.4 | 91566.6  | 110099.5 |
| 9671.6  | 33541.7 | 42618.2 | 52057.5 | 62392.7 | 75005.9 | 93256.3  | 110391.9 |
| 9758.8  | 33573.5 | 42729.5 | 52109.4 | 62396.5 | 75008.4 | 93805.5  | 110551.5 |
| 10003.0 | 33593.8 | 42792.2 | 52357.3 | 62545.9 | 75015.5 | 93935.9  | 112375.0 |
| 10751.3 | 33609.0 | 42833.3 | 52373.4 | 62699.4 | 75219.2 | 93985.8  | 112402.9 |
| 10912.7 | 33660.8 | 43823.0 | 52407.4 | 62732.6 | 76763.0 | 93986.9  | 112475.6 |
| 10929.0 | 33734.1 | 43968.9 | 52411.8 | 62755.7 | 76880.1 | 94510.5  | 112548.9 |
| 10938.5 | 33777.8 | 44158.9 | 52464.2 | 62779.6 | 77069.6 | 94879.1  | 113034.3 |
| 10956.5 | 33808.9 | 44347.9 | 52535.6 | 62814.5 | 77796.7 | 95166.4  | 113070.5 |
| 12465.8 | 33889.8 | 44537.3 | 52548.2 | 62831.3 | 77894.6 | 95360.3  | 113122.6 |
| 12486.9 | 34053.4 | 44569.1 | 52575.3 | 62873.8 | 79189.1 | 95455.8  | 113321.1 |
| 12606.0 | 34163.5 | 44572.7 | 52600.9 | 62906.5 | 79512.1 | 95490.4  | 113524.9 |
| 12661.8 | 34292.9 | 44594.2 | 52626.5 | 62951.8 | 80274.9 | 95505.8  | 113652.4 |
| 13752.5 | 35050.7 | 44604.2 | 52815.4 | 62959.9 | 80486.0 | 96400.5  | 113839.1 |
| 13830.3 | 35155.6 | 44627.0 | 53715.7 | 63045.5 | 80524.8 | 96722.1  | 113938.4 |
| 13890.0 | 35173.5 | 44629.0 | 53815.0 | 63046.3 | 80608.6 | 96779.6  | 114309.7 |
| 14607.9 | 35239.8 | 44650.4 | 53895.2 | 63113.2 | 80731.3 | 96922.9  | 114567.1 |
| 14687.0 | 35256.6 | 44669.5 | 53974.4 | 63130.9 | 80764.1 | 96951.5  | 114677.8 |
| 15157.2 | 35261.5 | 44730.2 | 53996.6 | 63234.6 | 80778.3 | 97024.1  | 115525.3 |
| 23424.4 | 35281.4 | 44730.4 | 54063.7 | 63252.7 | 80786.0 | 97220.1  | 115528.0 |
| 23440.3 | 35286.1 | 44766.5 | 54074.1 | 63259.9 | 80790.4 | 97270.6  | 115770.3 |
| 23698.0 | 35337.3 | 44802.4 | 54161.7 | 63308.1 | 80793.4 | 97305.3  | 116735.0 |
| 23821.2 | 35519.1 | 44859.5 | 54178.6 | 63310.7 | 80840.8 | 97450.1  | 117011.1 |
| 24008.1 | 35527.6 | 44862.2 | 54273.8 | 63343.3 | 80867.8 | 97474.8  | 117125.8 |
| 24428.0 | 35544.4 | 44929.2 | 54318.6 | 63426.4 | 80993.9 | 97572.0  | 117128.2 |
| 24431.0 | 35562.6 | 45124.3 | 54383.2 | 63487.6 | 81019.5 | 97618.1  | 117738.9 |
| 24482.4 | 35636.0 | 45289.4 | 54426.4 | 63501.7 | 81038.3 | 99244.7  | 119780.2 |
| 24571.7 | 35702.5 | 45336.3 | 54498.6 | 63515.0 | 81131.7 | 99562.9  | 120423.4 |
| 24636.5 | 35706.4 | 45361.0 | 54584.6 | 63594.1 | 81216.4 | 99720.9  | 124214.3 |
| 24654.1 | 35930.3 | 45396.4 | 54672.6 | 63623.7 | 81251.4 | 99727.8  | 124649.9 |
| 24707.6 | 36033.3 | 45401.7 | 54769.9 | 64517.3 | 81256.8 | 99783.4  | 124849.8 |
| 25084.0 | 36242.6 | 45437.8 | 54775.2 | 64703.5 | 81340.2 | 99804.9  | 124955.8 |
| 26091.9 | 36273.6 | 45441.6 | 55006.4 | 64772.6 | 81361.8 | 99809.6  | 125012.1 |
| 26220.3 | 36526.3 | 45745.7 | 55122.7 | 64775.0 | 81366.2 | 99845.4  | 125044.9 |
| 26316.0 | 36608.7 | 45821.9 | 55152.1 | 64782.7 | 81424.5 | 99866.6  | 125064.5 |
| 26338.5 | 36697.4 | 45850.4 | 55168.1 | 64803.6 | 81509.2 | 99889.1  | 125216.5 |
| 26351.6 | 36702.8 | 45865.4 | 55238.8 | 65198.5 | 81617.9 | 99994.1  | 125795.8 |
| 26397.8 | 36710.5 | 45959.0 | 55325.9 | 65391.7 | 81629.6 | 100014.7 | 126093.4 |
| 26432.4 | 36732.6 | 45973.6 | 55378.3 | 65475.8 | 81938.2 | 100082.3 | 126272.1 |
| 26456.2 | 36735.9 | 46093.6 | 55402.7 | 65564.9 | 81942.4 | 100815.2 | 126387.6 |
| 26532.2 | 36763.9 | 46098.4 | 55424.3 | 65586.8 | 81943.9 | 100864.8 | 126466.1 |
| 26615.7 | 36771.2 | 46196.0 | 55836.4 | 65622.1 | 82048.2 | 100972.0 | 126519.8 |
| 26617.3 | 36940.2 | 46250.0 | 56029.2 | 65638.9 | 82428.3 | 101005.5 | 126550.5 |
| 26641.5 | 37177.9 | 46317.3 | 56045.7 | 65653.1 | 83713.3 | 101060.0 | 127624.8 |
| 26807.3 | 37240.8 | 46346.3 | 56074.7 | 65653.2 | 83864.2 | 101062.9 | 127696.4 |
| 26862.8 | 37244.0 | 46353.3 | 56089.9 | 65658.3 | 83939.9 | 101122.3 | 128202.5 |
| 26966.2 | 37254.9 | 46476.3 | 56118.6 | 65721.5 | 84021.3 | 101163.0 | 128771.2 |
| 27087.1 | 37272.8 | 46536.4 | 56171.1 | 65782.6 | 84089.6 | 101551.3 | 129411.3 |
| 27147.0 | 37321.1 | 46563.8 | 56202.1 | 65841.6 | 84181.7 | 101756.7 | 135727.6 |
| 27464.2 | 37340.4 | 46775.8 | 56212.5 | 65847.6 | 84190.0 | 101775.7 | 135968.7 |
| 27481.9 | 37397.9 | 47080.0 | 56934.5 | 66307.8 | 84200.4 | 101832.7 | 136534.6 |
| 27531.9 | 37398.4 | 47123.6 | 57067.1 | 66520.3 | 84202.9 | 101854.1 | 138669.4 |
| 27574.7 | 37573.3 | 47164.4 | 57137.0 | 66630.0 | 84236.0 | 101913.0 | 138909.8 |
| 27613.8 | 37646.7 | 47182.2 | 57277.7 | 66760.2 | 84255.9 | 101949.5 | 139381.2 |
| 27687.0 | 37732.8 | 47238.3 | 57392.2 | 66761.4 | 84269.4 | 102002.7 | 139714.1 |
| 27742.6 | 37746.4 | 47247.8 | 57427.4 | 66770.0 | 84337.9 | 102310.2 | 143561.4 |
| 27920.7 | 37754.5 | 47259.4 | 58172.3 | 66777.5 | 84365.1 | 102473.0 | 143625.0 |
| 28009.8 | 37886.5 | 47376.4 | 58416.2 | 66854.8 | 84371.4 | 102502.3 | 143743.9 |
| 28046.1 | 38082.2 | 47377.2 | 58639.2 | 66938.9 | 84379.0 | 102684.6 | 143896.3 |
| 28059.1 | 38102.7 | 47511.7 | 58661.6 | 66943.1 | 84399.0 | 102892.6 | 144028.8 |
| 28077.7 | 38195.9 | 47615.5 | 58672.9 | 66972.2 | 84531.4 | 102934.9 | 146233.7 |
| 28157.8 | 38197.2 | 47677.1 | 58689.1 | 66979.0 | 84536.2 | 102940.1 | 146365.4 |
| 28206.0 | 38205.2 | 48331.4 | 58715.0 | 67021.7 | 84578.6 | 103080.8 | 146506.3 |
| 28220.5 | 38264.0 | 48385.0 | 58729.1 | 67046.4 | 84653.7 | 103197.0 | 146625.0 |
| 28246.8 | 38330.3 | 48444.7 | 58752.6 | 67052.2 | 84683.1 | 103217.5 | 146844.5 |
| 28270.2 | 38334.3 | 48552.9 | 58952.8 | 67069.1 | 84684.6 | 103240.5 | 146990.6 |
| 28283.2 | 38554.9 | 48607.4 | 59033.2 | 67070.8 | 84700.6 | 103246.8 | 149094.1 |
| 28298.1 | 38559.8 | 48659.9 | 59058.8 | 67085.5 | 84788.6 | 103306.7 | 149569.9 |
| 28321.0 | 38564.4 | 48712.6 | 59062.4 | 67092.8 | 84873.4 | 103410.7 | 149675.8 |
| 28328.8 | 38577.9 | 48739.3 | 59083.2 | 67114.3 | 84930.3 | 103423.4 | 149684.0 |
| 28338.5 | 38579.2 | 48765.8 | 59097.3 | 67140.4 | 85087.0 | 103646.1 | 149888.6 |
| 28342.1 | 38605.0 | 48779.5 | 59308.9 | 67504.9 | 85113.3 | 103653.2 | 150049.1 |
| 28393.1 | 38639.0 | 48790.5 | 59579.1 | 67852.4 | 85160.0 | 103660.8 | 150337.3 |
| 28396.1 | 38668.7 | 48804.0 | 59612.6 | 67901.5 | 85212.1 | 103689.3 | 153113.5 |

## Supporting Information

|         |         |         |         |         |         |          |          |
|---------|---------|---------|---------|---------|---------|----------|----------|
| 28425.6 | 38679.8 | 48837.0 | 59665.4 | 67932.4 | 85238.2 | 103704.0 | 153218.1 |
| 28467.0 | 38700.8 | 48918.4 | 59749.0 | 67970.0 | 85304.4 | 103737.4 | 153258.3 |
| 28468.5 | 38713.2 | 49030.7 | 59772.8 | 68004.5 | 85360.9 | 103768.9 | 153441.5 |
| 28551.3 | 38730.1 | 49090.9 | 59803.4 | 68006.0 | 85388.5 | 103811.7 | 153895.3 |
| 28569.4 | 38850.9 | 49121.4 | 59837.5 | 68673.9 | 85396.4 | 103813.9 | 177091.1 |
| 29645.7 | 38938.1 | 49307.7 | 59848.2 | 68739.2 | 85399.2 | 103832.4 | 178079.6 |
| 29665.3 | 39021.8 | 49427.5 | 59875.6 | 68950.3 | 85403.1 | 103857.3 | 178585.3 |
| 29673.8 | 39049.9 | 49431.3 | 59906.7 | 69037.3 | 85955.7 | 103992.0 | 181374.6 |
| 29708.3 | 39106.6 | 49485.0 | 59962.1 | 69163.1 | 86033.1 | 104030.0 | 181554.3 |
| 29752.4 | 39136.9 | 49487.7 | 59985.0 | 69172.3 | 86136.0 | 104047.0 | 181571.4 |
| 29775.9 | 39156.3 | 49522.6 | 60191.2 | 69212.7 | 86673.6 | 104049.6 | 181623.2 |
| 29921.3 | 39172.0 | 49546.5 | 60231.9 | 69378.9 | 86859.7 | 104090.4 | 181820.4 |
| 29946.9 | 39371.7 | 49588.6 | 60236.4 | 69596.7 | 88546.9 | 104169.8 | 182743.1 |
| 29992.7 | 39444.9 | 49597.6 | 60273.9 | 69631.9 | 88556.3 | 104182.0 | 184698.9 |
| 30063.8 | 39510.6 | 49636.2 | 60346.1 | 69673.8 | 88844.1 | 104280.9 | 184729.8 |
| 30203.7 | 39573.9 | 49722.5 | 60351.6 | 69729.1 | 88862.4 | 104336.3 | 185017.9 |
| 30230.4 |         |         |         |         |         |          |          |

**Table S31:** NEVPT2 computed the spin-orbit states for  $[\text{Dy}(\text{C}_8\text{H}_8)_2]^-$  complex. All the values are reported here in  $\text{cm}^{-1}$ .

| 5                 |         |         |         |         |         |         |          |
|-------------------|---------|---------|---------|---------|---------|---------|----------|
| Spin Orbit States |         |         |         |         |         |         |          |
| NEVPT2            |         |         |         |         |         |         |          |
| 0.0               | 30530.2 | 39188.6 | 48797.0 | 58246.2 | 66194.5 | 82363.9 | 97597.7  |
| 26.0              | 30540.4 | 39239.3 | 48890.6 | 58272.7 | 66527.7 | 82416.4 | 97600.3  |
| 38.6              | 30559.7 | 39242.8 | 48946.5 | 58340.9 | 66543.8 | 82448.8 | 97632.4  |
| 43.9              | 30685.1 | 39254.4 | 49406.0 | 58361.8 | 66569.6 | 82642.8 | 97684.2  |
| 60.1              | 30791.1 | 39277.9 | 49410.4 | 58381.2 | 66574.8 | 82723.1 | 97700.1  |
| 71.3              | 30946.1 | 39288.0 | 49417.6 | 58422.9 | 66711.7 | 82873.1 | 97720.1  |
| 307.1             | 30981.4 | 39346.7 | 49561.7 | 58434.8 | 66771.7 | 82922.0 | 97752.9  |
| 1407.5            | 31033.2 | 39369.0 | 49582.8 | 58507.0 | 67427.3 | 82941.0 | 97880.7  |
| 3003.0            | 31060.7 | 39376.0 | 49613.5 | 58517.0 | 67584.3 | 83103.2 | 97981.5  |
| 3043.5            | 31149.3 | 39425.2 | 49630.4 | 58523.7 | 67677.8 | 83319.0 | 97986.9  |
| 3066.7            | 31178.5 | 39432.2 | 49684.3 | 58567.3 | 67914.1 | 83336.6 | 98071.2  |
| 3110.3            | 31179.4 | 39489.6 | 49740.4 | 58572.7 | 67957.5 | 83384.0 | 98134.5  |
| 3204.8            | 31298.2 | 39491.3 | 49859.9 | 58628.4 | 68051.7 | 83576.1 | 98140.2  |
| 3388.4            | 31412.5 | 39535.3 | 49899.4 | 58699.9 | 68074.8 | 83621.9 | 98603.5  |
| 4067.3            | 31426.0 | 39536.9 | 49942.2 | 58706.5 | 68123.9 | 83723.2 | 98810.4  |
| 5209.8            | 31463.4 | 39586.3 | 49989.0 | 58716.3 | 68138.9 | 83750.9 | 99043.8  |
| 5215.4            | 31467.5 | 39622.2 | 50065.8 | 58744.6 | 68156.3 | 83795.7 | 99180.6  |
| 5233.5            | 31475.1 | 39671.3 | 50229.3 | 58834.1 | 68245.5 | 83866.6 | 99358.8  |
| 5392.1            | 31556.7 | 39690.8 | 51280.8 | 58844.5 | 68505.7 | 83878.8 | 99407.9  |
| 5607.3            | 31707.3 | 40068.1 | 51543.0 | 58896.8 | 69057.6 | 83985.7 | 99557.3  |
| 6040.5            | 31728.4 | 40099.7 | 51556.9 | 58986.3 | 69964.7 | 83991.5 | 99601.2  |
| 6898.7            | 31846.4 | 40103.6 | 51592.4 | 59097.5 | 70292.3 | 84072.1 | 99643.7  |
| 6915.6            | 31979.4 | 40228.6 | 51655.8 | 59108.6 | 70307.8 | 84084.3 | 99650.5  |
| 6978.9            | 32230.8 | 40232.7 | 51730.1 | 59118.5 | 70336.5 | 84132.9 | 99693.2  |
| 7242.0            | 32231.4 | 40329.3 | 51775.6 | 59124.2 | 70342.7 | 84159.4 | 99700.6  |
| 7655.2            | 32326.9 | 40356.0 | 51783.8 | 59215.0 | 70556.3 | 84195.0 | 99732.0  |
| 8148.2            | 32375.6 | 40356.0 | 51796.6 | 59239.3 | 70646.0 | 84197.6 | 99767.6  |
| 8172.4            | 32435.0 | 40497.9 | 51797.6 | 59249.5 | 70920.8 | 84458.0 | 100309.9 |
| 8191.1            | 32436.2 | 40551.9 | 51815.9 | 59285.6 | 71131.8 | 84486.2 | 100350.1 |
| 8228.9            | 32522.8 | 40606.7 | 51846.9 | 59331.0 | 71196.6 | 84593.1 | 100388.3 |
| 8299.1            | 32623.0 | 40641.2 | 51912.9 | 59360.2 | 71221.2 | 84633.3 | 100429.9 |
| 8315.7            | 32689.5 | 40660.0 | 51917.4 | 59431.1 | 71241.0 | 84650.1 | 100481.0 |
| 8447.1            | 32705.1 | 40878.3 | 51981.1 | 59469.7 | 71305.7 | 84676.0 | 100514.4 |
| 8507.8            | 32742.5 | 40915.7 | 52002.3 | 59523.7 | 71306.5 | 84819.1 | 100521.0 |
| 8634.9            | 32745.4 | 41379.6 | 52003.0 | 59532.9 | 71313.8 | 84840.4 | 100622.9 |
| 9029.8            | 32978.1 | 41526.4 | 52057.4 | 59559.1 | 71342.6 | 84997.5 | 100797.0 |
| 9162.4            | 33002.9 | 41859.8 | 52082.5 | 59560.0 | 71597.2 | 85893.9 | 101114.7 |
| 9202.3            | 33168.3 | 42003.2 | 52098.6 | 59566.9 | 71687.4 | 86549.5 | 101311.7 |
| 9572.8            | 33213.4 | 42974.0 | 52133.8 | 59571.0 | 71734.1 | 86662.3 | 102719.4 |
| 9753.1            | 33227.5 | 43045.8 | 52163.7 | 59578.2 | 71752.9 | 86759.9 | 102788.2 |
| 9789.6            | 33541.2 | 43160.5 | 52171.3 | 59620.7 | 71774.3 | 86780.3 | 102896.3 |
| 9795.3            | 33677.9 | 43188.2 | 52242.5 | 59697.4 | 71797.6 | 87877.7 | 103028.2 |
| 9813.0            | 33680.3 | 43410.1 | 52306.4 | 59709.3 | 71861.4 | 88245.4 | 103984.0 |
| 10194.2           | 33717.6 | 43501.3 | 52309.1 | 59718.5 | 71863.4 | 88518.8 | 104032.3 |
| 11283.5           | 33762.6 | 43505.5 | 52312.0 | 59767.8 | 71877.9 | 88593.8 | 104142.3 |
| 11287.3           | 33792.6 | 43540.0 | 52517.2 | 59775.4 | 72621.8 | 88670.0 | 104179.4 |
| 11465.4           | 33809.3 | 43583.8 | 52568.7 | 59840.7 | 72755.3 | 88708.8 | 104229.3 |

## Supporting Information

|         |         |         |         |         |         |         |          |
|---------|---------|---------|---------|---------|---------|---------|----------|
| 11521.8 | 33831.2 | 43588.1 | 52574.5 | 59877.6 | 73942.7 | 88843.4 | 104256.6 |
| 12536.1 | 33831.9 | 43681.9 | 52598.9 | 59933.3 | 74132.9 | 88942.9 | 104520.0 |
| 12650.0 | 33980.7 | 43764.4 | 52683.6 | 59937.5 | 74175.1 | 88958.0 | 104651.2 |
| 12707.2 | 34235.9 | 43774.2 | 52694.7 | 60195.3 | 74432.3 | 88968.3 | 104693.1 |
| 13373.8 | 34448.4 | 43962.7 | 52811.1 | 60365.7 | 74535.2 | 89181.9 | 104980.0 |
| 13493.9 | 34472.5 | 43963.8 | 52890.5 | 60378.9 | 74535.5 | 89259.6 | 105113.1 |
| 13944.7 | 34541.0 | 43968.9 | 53006.7 | 60384.7 | 74557.0 | 89362.4 | 106030.3 |
| 22297.7 | 34548.8 | 43997.9 | 53216.5 | 60396.8 | 74568.8 | 89604.3 | 106061.4 |
| 22366.6 | 34594.2 | 44207.4 | 53998.7 | 60477.8 | 74599.6 | 90109.4 | 106398.9 |
| 22474.1 | 34600.3 | 44376.2 | 54015.5 | 60507.7 | 74613.4 | 90413.5 | 107288.2 |
| 22787.1 | 34681.4 | 44642.1 | 54030.0 | 60935.2 | 74680.4 | 90802.7 | 107551.6 |
| 22943.9 | 34691.9 | 44691.0 | 54033.0 | 61019.0 | 74688.4 | 91042.6 | 107599.0 |
| 23985.4 | 34721.4 | 44823.1 | 54149.7 | 61096.1 | 74702.0 | 91134.5 | 107684.4 |
| 23993.1 | 34730.7 | 45032.0 | 54171.0 | 61133.5 | 74709.3 | 91176.6 | 107770.8 |
| 24031.6 | 34738.1 | 45460.6 | 54306.9 | 61198.2 | 74714.8 | 91482.5 | 109604.5 |
| 24106.3 | 34853.1 | 45496.1 | 54367.2 | 61278.0 | 74778.0 | 92041.4 | 110295.1 |
| 24149.8 | 34935.2 | 45580.3 | 54376.0 | 61371.9 | 74800.5 | 92088.3 | 115099.6 |
| 24370.9 | 35194.9 | 45599.3 | 54580.6 | 61399.2 | 74822.2 | 92103.2 | 115638.3 |
| 24654.6 | 35384.0 | 45633.9 | 54620.7 | 61454.9 | 74875.7 | 92230.8 | 115848.5 |
| 24802.7 | 35448.6 | 45674.0 | 54743.7 | 61511.8 | 75041.0 | 92246.8 | 115968.1 |
| 24905.6 | 35463.5 | 45701.7 | 54759.5 | 61606.6 | 75068.8 | 92307.7 | 116042.3 |
| 24967.9 | 35468.9 | 45810.6 | 54782.4 | 61620.9 | 75152.0 | 92521.8 | 116053.3 |
| 25053.4 | 35541.3 | 45819.4 | 54811.0 | 61634.5 | 75185.3 | 92826.5 | 116096.7 |
| 25072.9 | 35594.5 | 45831.1 | 54837.8 | 61671.8 | 75187.9 | 92969.0 | 116135.7 |
| 25221.4 | 35598.0 | 45902.1 | 54906.2 | 61911.4 | 75269.2 | 92997.5 | 116465.0 |
| 25234.3 | 35609.7 | 45941.8 | 54940.6 | 62131.1 | 75288.5 | 93046.5 | 116540.4 |
| 26606.5 | 35617.1 | 45942.8 | 54947.4 | 62166.3 | 75392.4 | 93414.7 | 116741.1 |
| 26668.8 | 35718.3 | 45988.3 | 54949.7 | 62166.7 | 75414.3 | 93438.1 | 117054.0 |
| 26700.4 | 35870.5 | 45991.8 | 54969.6 | 62204.5 | 75425.4 | 93479.6 | 117119.0 |
| 26852.2 | 35891.2 | 45996.9 | 55020.9 | 62237.9 | 75456.7 | 93536.9 | 117244.2 |
| 27065.6 | 35998.0 | 46016.7 | 55060.6 | 62317.1 | 75547.8 | 93596.1 | 117376.9 |
| 27197.5 | 36056.6 | 46096.8 | 55161.8 | 62329.7 | 77011.3 | 93629.1 | 117474.2 |
| 27233.0 | 36112.7 | 46126.9 | 55181.6 | 62430.6 | 77395.6 | 93632.2 | 117552.2 |
| 27251.3 | 36155.3 | 46131.1 | 55224.1 | 62440.6 | 77560.3 | 93671.1 | 117561.2 |
| 27294.6 | 36194.7 | 46192.6 | 55316.4 | 62563.4 | 77826.0 | 93696.0 | 117615.8 |
| 27431.8 | 36293.8 | 46263.5 | 55497.4 | 62633.7 | 77906.4 | 93718.3 | 118297.0 |
| 27578.6 | 36295.4 | 46285.2 | 55519.9 | 62752.6 | 78051.4 | 93733.1 | 122874.2 |
| 27964.9 | 36752.2 | 46570.3 | 55535.8 | 62849.7 | 78124.7 | 93740.2 | 123102.5 |
| 27980.3 | 36790.3 | 46612.7 | 55537.4 | 62851.7 | 78150.3 | 93836.6 | 123842.6 |
| 28210.8 | 36791.3 | 46625.2 | 55573.1 | 62877.6 | 78207.4 | 93951.0 | 125851.0 |
| 28267.0 | 36876.7 | 46704.5 | 55592.9 | 62898.9 | 78635.3 | 93952.8 | 126060.9 |
| 28326.9 | 36884.7 | 46762.7 | 55676.2 | 63068.5 | 78981.7 | 94032.1 | 126658.4 |
| 28362.3 | 36951.2 | 46788.4 | 55680.9 | 63142.7 | 79198.1 | 94438.9 | 127131.5 |
| 28387.5 | 36967.6 | 46798.3 | 55739.6 | 63158.2 | 79285.1 | 94574.2 | 131434.3 |
| 28504.9 | 37043.6 | 46818.8 | 55833.5 | 63306.8 | 79300.5 | 94647.5 | 131493.2 |
| 28582.1 | 37074.4 | 46841.5 | 55888.3 | 63472.4 | 79308.4 | 94672.1 | 131631.2 |
| 28649.5 | 37078.8 | 46939.7 | 55960.1 | 63543.0 | 79319.4 | 94690.4 | 131841.1 |
| 28705.2 | 37197.5 | 46943.4 | 56026.4 | 63807.8 | 79327.4 | 95046.0 | 132016.9 |
| 28732.7 | 37358.8 | 46949.5 | 56033.6 | 63815.2 | 79459.8 | 95523.2 | 133107.7 |
| 28830.9 | 37475.5 | 46972.8 | 56064.5 | 63815.4 | 79469.7 | 95525.5 | 133732.1 |
| 28877.2 | 37501.2 | 46980.8 | 56172.8 | 63895.5 | 79627.3 | 95548.1 | 134166.4 |
| 28887.4 | 37540.6 | 46994.3 | 56202.5 | 63936.6 | 79740.7 | 95666.6 | 134291.3 |
| 28999.1 | 37566.5 | 47040.5 | 56226.5 | 63980.9 | 79784.6 | 95677.9 | 134606.9 |
| 29071.3 | 37569.0 | 47077.9 | 56291.7 | 64014.5 | 79830.0 | 95714.1 | 134868.1 |
| 29100.0 | 37591.6 | 47119.4 | 56337.9 | 64049.2 | 79924.7 | 95786.6 | 135835.6 |
| 29128.7 | 37605.0 | 47125.3 | 56424.8 | 64059.9 | 79934.1 | 95833.8 | 136742.7 |
| 29152.0 | 37614.1 | 47188.7 | 56462.8 | 64075.8 | 80017.0 | 95912.1 | 136864.2 |
| 29167.5 | 37629.8 | 47197.6 | 56513.3 | 64190.4 | 80446.2 | 95968.6 | 136875.8 |
| 29187.1 | 37659.2 | 47228.8 | 56636.0 | 64233.3 | 80450.2 | 95970.8 | 137131.6 |
| 29242.6 | 37697.9 | 47272.8 | 56693.9 | 64240.2 | 80495.8 | 96194.0 | 137339.6 |
| 29332.1 | 37701.6 | 47273.7 | 56775.1 | 64259.8 | 80697.8 | 96324.1 | 137764.0 |
| 29368.1 | 37817.8 | 47328.7 | 56782.6 | 64269.0 | 80894.9 | 96345.4 | 140337.1 |
| 29400.6 | 37827.0 | 47382.5 | 56812.9 | 64315.3 | 81092.5 | 96369.8 | 140431.7 |
| 29585.1 | 37869.8 | 47395.8 | 56838.9 | 64343.8 | 81273.8 | 96390.2 | 140525.9 |
| 29611.0 | 37929.6 | 47429.6 | 56913.4 | 64398.2 | 81367.4 | 96423.0 | 140765.9 |
| 29792.5 | 37950.6 | 47435.1 | 56937.7 | 64633.0 | 81369.4 | 96453.2 | 141331.5 |
| 29823.5 | 37979.6 | 47439.2 | 57042.5 | 64671.9 | 81389.8 | 96481.4 | 159982.4 |
| 29853.9 | 38139.0 | 47443.7 | 57304.6 | 64711.0 | 81411.3 | 96503.0 | 161028.5 |
| 29862.3 | 38199.6 | 47460.6 | 57750.4 | 64711.3 | 81418.0 | 96526.7 | 161577.9 |
| 29863.1 | 38218.3 | 47489.0 | 57768.7 | 64751.0 | 81625.1 | 96544.7 | 163803.0 |
| 29881.1 | 38221.4 | 47536.5 | 57841.4 | 64782.0 | 81669.4 | 96668.7 | 163858.9 |
| 29953.7 | 38350.5 | 47544.0 | 57890.0 | 65086.9 | 81736.6 | 97255.9 | 164182.6 |
| 30056.9 | 38440.4 | 47683.6 | 57921.9 | 65251.1 | 81924.6 | 97284.1 | 164221.3 |
| 30120.2 | 39028.5 | 47781.9 | 57944.1 | 65282.8 | 81977.7 | 97311.8 | 164413.2 |
| 30218.5 | 39044.8 | 47877.8 | 57979.0 | 65340.1 | 82007.7 | 97333.3 | 165607.4 |
| 30225.4 | 39050.7 | 48574.1 | 58035.6 | 65343.5 | 82104.9 | 97348.6 | 167013.5 |
| 30244.7 | 39166.2 | 48652.5 | 58171.3 | 65486.6 | 82138.7 | 97443.3 | 167233.4 |

## Supporting Information

|                    |         |         |         |         |         |         |          |
|--------------------|---------|---------|---------|---------|---------|---------|----------|
| 30249.4<br>30504.4 | 39169.5 | 48672.3 | 58200.4 | 65530.4 | 82245.1 | 97475.6 | 167502.1 |
|--------------------|---------|---------|---------|---------|---------|---------|----------|

**Table S32.** CASSCF computed 21 roots of sextet (red) along with 224 roots of quartet and 490 roots of doublet states for  $[\text{Dy}(\text{C}_9\text{H}_9)_2]^+$  complex. All the values are reported herein  $\text{cm}^{-1}$ .

| 6                |         |         |         |         |          |  |
|------------------|---------|---------|---------|---------|----------|--|
| Spin free States |         |         |         |         |          |  |
| CASSCF           |         |         |         |         |          |  |
| 87.7             | 36521.0 | 46664.6 | 56874.0 | 79231.1 | 97431.8  |  |
| 88.7             | 36672.7 | 46664.6 | 56874.5 | 79236.1 | 97444.5  |  |
| 135.6            | 36672.9 | 46825.1 | 56967.5 | 79236.1 | 97444.5  |  |
| 135.7            | 36730.9 | 46825.1 | 56967.8 | 79260.1 | 98040.2  |  |
| 168.3            | 36730.9 | 47000.7 | 57083.6 | 79260.1 | 98095.5  |  |
| 178.4            | 36805.1 | 47000.7 | 57083.7 | 79283.7 | 98097.1  |  |
| 186.7            | 36805.3 | 47196.7 | 57360.9 | 79283.7 | 98245.4  |  |
| 186.7            | 36858.2 | 47198.3 | 57360.9 | 79435.0 | 98246.1  |  |
| 1177.9           | 36874.2 | 47215.2 | 58356.9 | 79435.0 | 100652.3 |  |
| 1177.9           | 36885.1 | 47215.2 | 58357.0 | 79613.8 | 100652.4 |  |
| 7436.8           | 36885.1 | 47320.2 | 58617.1 | 79613.8 | 100654.6 |  |
| 7441.2           | 36948.2 | 47320.7 | 58617.1 | 79822.2 | 100654.6 |  |
| 7539.2           | 36948.5 | 47367.3 | 58720.8 | 79822.2 | 100667.2 |  |
| 7539.2           | 37017.5 | 47608.7 | 58795.1 | 79915.6 | 100667.4 |  |
| 7796.3           | 37017.9 | 47608.7 | 58795.3 | 79915.6 | 100668.8 |  |
| 7796.5           | 37231.4 | 47903.6 | 58868.2 | 79935.3 | 100669.3 |  |
| 7924.8           | 37278.1 | 47903.6 | 58868.2 | 79935.4 | 100676.8 |  |
| 34006.8          | 37278.1 | 48031.2 | 58900.9 | 79944.3 | 100677.1 |  |
| 34008.3          | 37543.0 | 48040.5 | 58903.3 | 79944.4 | 100678.8 |  |
| 34990.8          | 37544.9 | 48041.4 | 59004.1 | 79964.2 | 100830.4 |  |
| 24240.1          | 37566.6 | 48065.7 | 59004.4 | 79965.9 | 100830.4 |  |
| 24241.4          | 37566.7 | 48070.1 | 59493.4 | 79984.5 | 102131.3 |  |
| 24255.3          | 38005.0 | 48081.1 | 59493.8 | 79985.1 | 102131.3 |  |
| 24255.3          | 38005.0 | 48081.1 | 59831.3 | 79992.5 | 102193.3 |  |
| 24308.6          | 38088.3 | 48105.8 | 59867.4 | 84086.9 | 102193.3 |  |
| 24308.7          | 38088.4 | 48105.9 | 59888.6 | 84088.9 | 102280.3 |  |
| 24323.3          | 38088.9 | 48143.5 | 59888.6 | 84806.1 | 102280.3 |  |
| 24323.4          | 38089.0 | 48143.6 | 59938.8 | 84807.2 | 102412.3 |  |
| 24348.8          | 38248.5 | 48157.6 | 59939.2 | 84941.5 | 102412.6 |  |
| 24348.9          | 38250.5 | 48157.6 | 60095.7 | 85270.8 | 102641.0 |  |
| 24461.0          | 38324.0 | 48167.9 | 60100.2 | 85291.7 | 102641.7 |  |
| 24461.0          | 38324.0 | 48167.9 | 60949.0 | 85293.0 | 102734.4 |  |
| 24474.5          | 38379.4 | 50768.9 | 60949.0 | 85438.9 | 104675.8 |  |
| 24603.9          | 38379.5 | 50768.9 | 61364.7 | 85439.1 | 104675.8 |  |
| 24603.9          | 38424.5 | 50939.7 | 61364.7 | 85542.9 | 104936.1 |  |
| 24667.4          | 38652.3 | 50983.8 | 61630.3 | 85542.9 | 104936.1 |  |
| 24672.8          | 38652.3 | 50983.9 | 61630.3 | 85686.5 | 105069.5 |  |
| 24708.9          | 41172.9 | 51089.1 | 61694.7 | 85687.9 | 105069.7 |  |
| 24709.2          | 41172.9 | 51096.4 | 61715.4 | 86193.5 | 105299.0 |  |
| 24766.7          | 41311.4 | 51254.7 | 61716.0 | 86193.5 | 105299.6 |  |
| 24766.8          | 41311.4 | 51254.7 | 61764.7 | 86470.7 | 105394.3 |  |
| 24772.4          | 41452.6 | 51286.9 | 61765.2 | 86470.7 | 105894.4 |  |
| 24772.4          | 41452.6 | 51287.0 | 61787.5 | 86626.9 | 105894.4 |  |
| 24813.8          | 41457.8 | 51393.4 | 61787.5 | 86626.9 | 105986.6 |  |
| 24813.9          | 41458.4 | 51393.4 | 61810.3 | 86887.6 | 105986.6 |  |
| 24887.5          | 41592.5 | 51751.6 | 61810.3 | 86887.6 | 106499.4 |  |
| 24887.6          | 41599.5 | 51751.6 | 63260.6 | 87146.2 | 106508.0 |  |
| 24894.5          | 41599.5 | 51784.6 | 63470.9 | 87146.2 | 106834.0 |  |
| 24894.5          | 41694.7 | 51784.6 | 63471.1 | 87169.1 | 106835.0 |  |
| 24937.5          | 41694.7 | 51825.4 | 63569.1 | 87169.2 | 106927.0 |  |
| 25014.3          | 41750.0 | 51825.5 | 63569.1 | 87281.7 | 109737.5 |  |
| 25014.3          | 41750.0 | 51846.7 | 63578.3 | 87285.9 | 109799.4 |  |
| 25084.6          | 41792.9 | 51846.7 | 63580.1 | 87300.9 | 109800.1 |  |
| 25084.6          | 41792.9 | 51877.8 | 66052.8 | 87302.7 | 109961.7 |  |
| 25205.3          | 41845.1 | 51877.8 | 66760.7 | 87303.7 | 109965.6 |  |
| 25209.0          | 41845.1 | 52026.8 | 66760.7 | 87544.5 | 110388.3 |  |
| 25339.2          | 41914.2 | 52026.9 | 66993.9 | 87544.7 | 110388.3 |  |
| 25339.8          | 41914.9 | 52133.6 | 66995.4 | 87564.8 | 114083.2 |  |
| 25431.9          | 41989.0 | 52134.1 | 67161.8 | 87611.7 | 114084.4 |  |
| 25597.4          | 41989.9 | 52169.5 | 67161.8 | 87612.4 | 114913.0 |  |
| 25860.9          | 42028.8 | 54414.2 | 67296.3 | 87703.2 | 119064.8 |  |
| 25861.6          | 42151.2 | 54414.2 | 67296.4 | 87703.3 | 119064.8 |  |
| 25909.5          | 42193.4 | 54477.2 | 67324.9 | 87712.5 | 119564.9 |  |
| 25909.5          | 42193.9 | 54481.2 | 67327.1 | 87712.6 | 119564.9 |  |
| 25998.6          | 42428.6 | 54578.0 | 67354.4 | 92998.3 | 119831.1 |  |
| 25998.7          | 42475.5 | 54578.0 | 67354.9 | 93000.3 | 119831.1 |  |
| 26173.1          | 42475.5 | 54725.1 | 67367.6 | 93072.0 | 120007.5 |  |

## Supporting Information

|         |         |         |         |         |          |
|---------|---------|---------|---------|---------|----------|
| 26173.1 | 42484.2 | 54725.7 | 69017.7 | 93072.1 | 120007.5 |
| 29057.6 | 42484.2 | 54895.0 | 69017.7 | 93175.8 | 120137.6 |
| 29085.3 | 42507.2 | 54926.8 | 69073.9 | 93175.8 | 120137.6 |
| 29085.6 | 42507.2 | 54926.8 | 69074.5 | 93176.7 | 120235.1 |
| 29096.7 | 42548.7 | 55180.0 | 69099.9 | 94787.0 | 120238.8 |
| 29096.7 | 42563.1 | 55180.0 | 69105.2 | 94802.6 | 120305.9 |
| 29149.0 | 42624.9 | 55288.3 | 69105.4 | 94803.0 | 120307.0 |
| 29152.0 | 42627.6 | 55288.3 | 69126.4 | 94904.9 | 120332.4 |
| 29152.3 | 42639.3 | 55370.6 | 69128.4 | 94906.9 | 122136.8 |
| 29153.3 | 42639.3 | 55376.7 | 69131.6 | 95066.6 | 122268.3 |
| 29209.2 | 42698.0 | 55376.8 | 69131.6 | 95066.6 | 122269.2 |
| 29209.2 | 42698.3 | 55380.7 | 69147.5 | 95115.1 | 122893.9 |
| 29229.5 | 42775.3 | 55381.1 | 69147.6 | 95115.1 | 122895.9 |
| 29229.5 | 42775.3 | 55406.7 | 69187.6 | 95151.0 | 131450.3 |
| 29349.4 | 42890.2 | 55407.9 | 69187.6 | 95151.0 | 131450.3 |
| 29349.4 | 42890.2 | 55448.9 | 70355.8 | 95434.0 | 131833.2 |
| 30450.5 | 42912.4 | 55448.9 | 70355.9 | 95434.0 | 131834.2 |
| 30450.5 | 42912.4 | 55456.0 | 70727.4 | 95771.8 | 132386.5 |
| 30536.4 | 43082.8 | 55456.0 | 71802.0 | 95771.8 | 132387.8 |
| 30540.1 | 43082.8 | 55664.6 | 72109.7 | 95898.5 | 132720.6 |
| 30540.1 | 43085.2 | 55664.7 | 72111.1 | 95899.1 | 139492.8 |
| 30562.1 | 43085.2 | 55801.0 | 72440.6 | 95915.9 | 139506.3 |
| 30564.8 | 43149.3 | 55801.0 | 72719.7 | 95973.6 | 139507.1 |
| 30625.4 | 43149.3 | 55990.1 | 72723.6 | 95976.2 | 139625.4 |
| 30625.4 | 43238.7 | 55990.2 | 72802.4 | 96044.0 | 139628.2 |
| 30726.6 | 43239.0 | 55997.5 | 72802.8 | 96044.1 | 139902.0 |
| 30726.6 | 43267.8 | 56001.4 | 72930.5 | 96090.5 | 139902.0 |
| 30802.0 | 44213.5 | 56001.7 | 72933.2 | 96090.5 | 140140.1 |
| 30802.0 | 44213.5 | 56041.0 | 76144.5 | 96187.2 | 140140.1 |
| 30822.8 | 44271.8 | 56041.0 | 76144.5 | 96187.2 | 141633.2 |
| 30822.8 | 44271.8 | 56102.6 | 76160.4 | 96228.7 | 142392.0 |
| 30864.3 | 44307.2 | 56102.6 | 76247.9 | 96228.7 | 142393.1 |
| 30864.3 | 44307.2 | 56148.0 | 76247.9 | 96236.0 | 145772.0 |
| 32297.1 | 44349.3 | 56148.0 | 76267.4 | 96237.3 | 145772.0 |
| 32297.3 | 44349.4 | 56182.6 | 76267.4 | 96239.5 | 145820.0 |
| 32474.2 | 44430.8 | 56182.8 | 76330.8 | 96239.5 | 145825.1 |
| 32477.8 | 44430.8 | 56221.9 | 76331.5 | 96251.7 | 145851.3 |
| 32692.9 | 44435.5 | 56224.6 | 76339.3 | 96251.9 | 145851.4 |
| 33863.6 | 44435.5 | 56230.2 | 76341.4 | 96263.8 | 145944.4 |
| 33868.5 | 44485.3 | 56241.2 | 76341.6 | 96516.4 | 145944.9 |
| 33886.8 | 44489.9 | 56241.8 | 77631.4 | 96516.4 | 145987.6 |
| 33893.1 | 44497.3 | 56282.6 | 77632.0 | 96777.5 | 146445.2 |
| 33893.2 | 44497.4 | 56282.6 | 77773.7 | 96777.5 | 146445.2 |
| 33911.1 | 44527.9 | 56314.8 | 77774.0 | 97054.8 | 173637.7 |
| 33911.1 | 44527.9 | 56314.8 | 77818.3 | 97054.8 | 173646.0 |
| 34030.7 | 44569.5 | 56433.9 | 78325.9 | 97118.2 | 174986.0 |
| 34030.8 | 44663.0 | 56444.5 | 78325.9 | 97118.2 | 174986.4 |
| 34087.5 | 44664.6 | 56445.4 | 78984.5 | 97194.3 | 175210.9 |
| 34087.5 | 44798.4 | 56519.2 | 79026.8 | 97241.3 | 177247.4 |
| 36353.7 | 44832.9 | 56519.2 | 79027.1 | 97242.0 | 177247.4 |
| 36353.7 | 44833.6 | 56571.0 | 79128.9 | 97342.9 | 177435.1 |
| 36397.5 | 44893.4 | 56574.7 | 79130.8 | 97345.3 | 177436.1 |
| 36397.5 | 45510.6 | 56774.1 | 79199.4 | 97345.3 | 177495.7 |
| 36477.9 | 45511.3 | 56774.1 | 79199.4 | 97346.7 | 177805.6 |
| 36477.9 | 45639.5 | 56816.1 | 79231.1 | 97431.8 | 177806.8 |
| 36521.0 | 45647.0 |         |         |         |          |

**Table S33:** NEVPT2 computed 21 roots of sextet (red) along with 224 roots of quartet and 490 roots of doublet states for  $[\text{Dy}(\text{C}_9\text{H}_9)_2]^+$  complex. All the values are reported herein  $\text{cm}^{-1}$ .

| 6                |         |         |         |         |         |
|------------------|---------|---------|---------|---------|---------|
| Spin free States |         |         |         |         |         |
| NEVPT2           |         |         |         |         |         |
| 160.1            | 34866.8 | 44794.3 | 54765.7 | 74937.0 | 91136.1 |
| 160.8            | 34943.2 | 44794.4 | 54765.7 | 74962.6 | 91142.1 |
| 164.3            | 34943.3 | 44830.6 | 54798.9 | 74962.6 | 91214.5 |
| 164.6            | 35231.9 | 44830.7 | 54799.8 | 75058.3 | 91214.5 |
| 199.2            | 35235.2 | 44888.9 | 54929.6 | 75058.3 | 91296.7 |
| 199.4            | 36968.4 | 44889.0 | 54929.7 | 75074.0 | 91296.7 |
| 280.0            | 36968.4 | 44914.6 | 54964.6 | 75074.0 | 91330.7 |
| 298.9            | 37051.3 | 44915.2 | 54964.7 | 75563.8 | 91330.8 |
| 1447.5           | 37051.3 | 44966.8 | 55428.8 | 75564.8 | 93313.4 |
| 1447.5           | 37163.9 | 49009.7 | 55442.5 | 75634.6 | 93313.4 |
| 6233.8           | 37163.9 | 49009.7 | 55453.5 | 76289.4 | 93315.7 |
| 6242.7           | 37224.6 | 49108.5 | 55453.8 | 76289.5 | 93315.8 |
| 6390.3           | 37224.6 | 49108.5 | 55747.2 | 76503.2 | 93335.3 |

## Supporting Information

|         |         |         |         |         |          |
|---------|---------|---------|---------|---------|----------|
| 6390.3  | 37435.2 | 49303.9 | 55747.3 | 76503.2 | 93335.5  |
| 6695.7  | 37436.1 | 49366.9 | 55751.8 | 76713.1 | 93337.9  |
| 6696.3  | 37536.3 | 49366.9 | 55864.4 | 76713.1 | 93339.7  |
| 6847.9  | 37536.3 | 49502.6 | 55864.6 | 76783.5 | 93359.2  |
| 28754.8 | 37537.9 | 49515.6 | 55931.1 | 76783.6 | 93359.6  |
| 28756.3 | 37538.0 | 49667.4 | 55931.7 | 76871.1 | 93363.0  |
| 29795.4 | 37633.7 | 49667.4 | 55933.2 | 76871.1 | 93565.4  |
| 23273.8 | 37634.0 | 49715.9 | 55944.6 | 76945.3 | 93565.4  |
| 23286.2 | 37652.8 | 49716.0 | 55996.1 | 76945.4 | 94218.9  |
| 23499.8 | 37653.0 | 49805.1 | 55996.2 | 77003.0 | 94218.9  |
| 23500.6 | 37682.4 | 49805.1 | 56264.8 | 77003.1 | 94252.2  |
| 23526.5 | 37682.7 | 49903.5 | 56728.0 | 77042.0 | 94252.3  |
| 23527.4 | 37696.3 | 49903.5 | 56728.0 | 77044.4 | 94258.3  |
| 23551.6 | 37696.4 | 50115.7 | 56750.6 | 77072.1 | 94258.4  |
| 23566.9 | 37716.7 | 50115.7 | 56750.8 | 77072.8 | 94443.8  |
| 23567.0 | 37889.5 | 50461.7 | 56808.0 | 77082.1 | 94443.8  |
| 23568.3 | 37892.3 | 50465.4 | 56998.1 | 78783.2 | 94508.1  |
| 23689.2 | 37994.0 | 50465.4 | 57004.2 | 78800.2 | 94508.3  |
| 23828.9 | 37994.1 | 50482.2 | 57425.0 | 78803.3 | 94603.9  |
| 23829.1 | 38073.0 | 50483.0 | 57425.0 | 79038.4 | 94604.1  |
| 23835.7 | 38073.0 | 50518.9 | 57886.5 | 79038.6 | 94658.2  |
| 23835.8 | 38129.1 | 50528.1 | 57886.5 | 79116.7 | 94658.9  |
| 23937.5 | 38373.5 | 50592.3 | 58161.9 | 79116.9 | 94796.2  |
| 24083.4 | 38373.6 | 50592.4 | 58190.7 | 79268.5 | 94797.0  |
| 24402.5 | 38535.7 | 50661.7 | 58191.0 | 79268.5 | 94913.4  |
| 24406.9 | 38536.3 | 50661.8 | 58202.0 | 79384.6 | 94953.7  |
| 24433.2 | 38700.3 | 50662.7 | 58202.4 | 79387.4 | 94954.4  |
| 24433.4 | 39362.2 | 50663.2 | 58284.2 | 79851.8 | 95069.3  |
| 24467.5 | 39480.0 | 50716.4 | 58285.9 | 79851.9 | 96491.8  |
| 24467.6 | 39480.7 | 50716.4 | 58375.0 | 80270.7 | 96491.8  |
| 24603.4 | 39815.0 | 50730.9 | 58375.1 | 80326.9 | 96559.2  |
| 24603.5 | 39815.0 | 50730.9 | 58375.5 | 80328.2 | 96559.2  |
| 24701.8 | 40020.6 | 50849.7 | 58375.6 | 80352.1 | 97122.0  |
| 24701.8 | 40045.7 | 50849.7 | 58644.8 | 80352.7 | 97137.0  |
| 25086.4 | 40285.2 | 50888.6 | 58971.5 | 80489.0 | 97530.0  |
| 25086.4 | 40303.4 | 50888.6 | 58971.7 | 80490.3 | 97530.9  |
| 25909.0 | 40436.2 | 50920.9 | 59036.0 | 80507.1 | 97616.9  |
| 25909.8 | 40436.2 | 50921.0 | 59036.2 | 80508.3 | 10040.1  |
| 26083.1 | 40920.5 | 50955.8 | 59102.3 | 80528.0 | 100521.7 |
| 26083.2 | 40946.3 | 50955.9 | 59105.3 | 80528.0 | 100522.2 |
| 26602.5 | 40946.6 | 51010.0 | 59957.3 | 80709.4 | 100699.4 |
| 26604.4 | 41292.6 | 51010.0 | 60997.7 | 80709.7 | 100707.0 |
| 26677.4 | 42226.6 | 51168.9 | 60999.3 | 81195.6 | 101202.0 |
| 26679.6 | 42227.2 | 51169.4 | 62921.3 | 81195.7 | 101202.0 |
| 26722.8 | 42295.1 | 51328.7 | 62921.4 | 81517.0 | 104070.7 |
| 26722.9 | 42306.9 | 51329.2 | 63399.1 | 81517.0 | 104071.9 |
| 26870.8 | 42474.8 | 51382.6 | 63399.2 | 81606.8 | 104937.3 |
| 26870.8 | 42475.1 | 51731.7 | 63522.0 | 81624.2 | 110032.5 |
| 27022.8 | 42549.2 | 51739.3 | 63525.7 | 81630.2 | 110032.8 |
| 27022.8 | 42549.3 | 51765.7 | 63525.8 | 81631.5 | 110587.4 |
| 27168.9 | 42561.4 | 51765.7 | 63526.9 | 81632.5 | 110587.4 |
| 27178.0 | 42561.4 | 51981.6 | 63561.9 | 84917.6 | 110843.2 |
| 27185.7 | 42586.5 | 51981.6 | 63562.6 | 84921.2 | 110843.3 |
| 27255.4 | 42586.5 | 52047.8 | 63581.8 | 85007.2 | 110977.5 |
| 27257.1 | 42630.1 | 52061.0 | 65129.1 | 85007.4 | 111017.4 |
| 29238.6 | 42641.2 | 52061.9 | 65332.1 | 85112.1 | 111017.4 |
| 29282.4 | 42677.8 | 52081.6 | 65332.3 | 85112.2 | 111118.7 |
| 29282.7 | 42678.6 | 52082.3 | 65428.2 | 85155.3 | 111119.8 |
| 29296.8 | 42685.3 | 52167.3 | 65429.7 | 87324.8 | 111155.1 |
| 29296.9 | 42685.4 | 52167.3 | 65800.3 | 87345.9 | 111155.4 |
| 29380.4 | 42738.7 | 52223.0 | 65902.8 | 87346.3 | 111268.2 |
| 29387.5 | 42738.7 | 52230.7 | 65902.8 | 87443.3 | 111274.6 |
| 29409.2 | 42752.5 | 52344.5 | 65979.5 | 87443.4 | 111367.6 |
| 29409.5 | 42757.9 | 52578.9 | 65990.9 | 87499.1 | 111369.1 |
| 29479.2 | 42757.9 | 52578.9 | 65991.4 | 87501.9 | 111398.2 |
| 29479.2 | 43047.9 | 52760.0 | 66005.7 | 87717.9 | 111807.9 |
| 29527.1 | 43050.7 | 52760.0 | 66008.5 | 87718.0 | 111810.4 |
| 29527.2 | 43233.9 | 52886.4 | 66047.0 | 87744.9 | 118638.4 |
| 29645.1 | 43233.9 | 52960.2 | 66050.9 | 87745.0 | 118638.4 |
| 29645.1 | 43267.9 | 52960.2 | 66094.6 | 87845.6 | 118967.9 |
| 29656.2 | 43268.7 | 52970.5 | 66094.6 | 87845.7 | 118969.3 |
| 29656.5 | 43344.1 | 52971.0 | 66103.9 | 87950.8 | 119622.5 |
| 29883.3 | 43386.9 | 53073.3 | 66103.9 | 87951.5 | 119624.1 |
| 29890.2 | 43386.9 | 53073.3 | 66147.3 | 87992.6 | 120080.5 |
| 30199.5 | 43538.7 | 53084.4 | 66147.4 | 88004.5 | 127539.3 |
| 31288.1 | 43538.7 | 53085.9 | 66339.2 | 88014.1 | 127542.9 |
| 31288.1 | 43702.1 | 53533.5 | 66343.7 | 88458.7 | 127543.7 |



## Supporting Information

|         |         |         |         |         |          |
|---------|---------|---------|---------|---------|----------|
| 31403.8 | 43702.1 | 53533.5 | 66525.2 | 88681.4 | 127661.4 |
| 31403.8 | 43786.5 | 53610.6 | 66870.7 | 88682.0 | 127667.5 |
| 31403.8 | 43796.7 | 53613.6 | 66878.1 | 88683.7 | 127980.2 |
| 31428.3 | 43796.7 | 53668.0 | 67053.6 | 88683.7 | 127980.3 |
| 31433.2 | 43830.9 | 53668.0 | 67054.2 | 88831.8 | 128231.1 |
| 31507.4 | 43831.0 | 53682.5 | 68773.6 | 88832.6 | 128231.1 |
| 31507.4 | 43845.0 | 53682.5 | 69963.7 | 89092.2 | 128362.9 |
| 31642.9 | 43845.0 | 53741.6 | 69965.6 | 89101.1 | 129217.1 |
| 31642.9 | 43871.9 | 53741.6 | 70028.8 | 89559.3 | 129218.5 |
| 31739.7 | 43871.9 | 53762.2 | 70028.8 | 89559.3 | 133083.6 |
| 31739.7 | 43938.7 | 53762.6 | 70061.2 | 89717.3 | 133083.9 |
| 31775.9 | 43941.5 | 53854.7 | 70061.2 | 89717.3 | 133133.4 |
| 31775.9 | 43945.2 | 53862.8 | 70099.9 | 89828.3 | 133143.1 |
| 31830.6 | 43945.6 | 53862.9 | 70100.4 | 89905.0 | 133158.2 |
| 31830.6 | 44004.5 | 53930.3 | 70111.9 | 89968.3 | 133158.2 |
| 32650.6 | 44015.3 | 53930.4 | 70114.1 | 89968.3 | 133304.5 |
| 32658.5 | 44015.3 | 53960.9 | 70114.3 | 89972.4 | 133305.9 |
| 32661.3 | 44017.3 | 53981.2 | 70272.1 | 90043.9 | 133362.1 |
| 32707.2 | 44056.1 | 53981.3 | 70272.4 | 90251.1 | 133919.3 |
| 32707.4 | 44058.0 | 54003.0 | 70432.6 | 90251.2 | 133919.7 |
| 32722.2 | 44146.1 | 54013.4 | 70433.5 | 90276.5 | 156816.0 |
| 32722.2 | 44168.5 | 54039.9 | 70576.4 | 90276.5 | 156831.7 |
| 32894.3 | 44168.5 | 54040.6 | 71146.9 | 90404.5 | 158153.9 |
| 32894.5 | 44370.1 | 54471.5 | 71146.9 | 90404.9 | 158154.1 |
| 32977.5 | 44370.3 | 54471.5 | 74612.3 | 90468.4 | 158499.2 |
| 32977.5 | 44510.5 | 54521.0 | 74672.8 | 90583.0 | 159626.4 |
| 33617.0 | 44510.5 | 54596.0 | 74673.2 | 90583.0 | 159626.6 |
| 33952.2 | 44588.5 | 54596.0 | 74758.5 | 90851.6 | 159795.7 |
| 33952.7 | 44588.5 | 54607.2 | 74761.6 | 90946.3 | 159885.4 |
| 34465.8 | 44608.6 | 54607.2 | 74817.0 | 90946.7 | 159886.3 |
| 34466.7 | 44608.6 | 54614.3 | 74819.7 | 90948.1 | 160432.6 |
| 34771.5 | 44772.9 | 54614.6 | 74937.0 | 90948.4 | 160435.0 |
| 34866.7 | 44776.1 |         |         |         |          |

**Table S34:** CASSCF computed the spin-orbit states for  $[\text{Dy}(\text{C}_9\text{H}_9)_2]^+$  complex. All the values are reported here in  $\text{cm}^{-1}$ .

| 6                 |         |         |         |         |         |         |          |
|-------------------|---------|---------|---------|---------|---------|---------|----------|
| Spin Orbit States |         |         |         |         |         |         |          |
| CASSCF            |         |         |         |         |         |         |          |
| 0.0               | 30266.0 | 39858.0 | 49823.5 | 60511.9 | 69887.1 | 89072.3 | 104520.6 |
| 20.1              | 30369.6 | 39872.3 | 49880.1 | 60542.9 | 69904.2 | 89473.3 | 104556.3 |
| 48.9              | 31299.9 | 39926.2 | 49912.6 | 60546.6 | 70244.5 | 89614.5 | 104586.3 |
| 71.0              | 31347.7 | 39952.4 | 49955.5 | 60549.7 | 70566.7 | 89685.8 | 104829.2 |
| 92.5              | 31348.5 | 40003.4 | 50096.4 | 60588.0 | 70763.4 | 89743.2 | 105351.3 |
| 156.7             | 31403.6 | 40076.8 | 50191.1 | 60606.2 | 70857.4 | 89751.7 | 105514.2 |
| 369.7             | 31432.4 | 40086.5 | 50209.5 | 60800.4 | 71419.4 | 89813.8 | 105562.7 |
| 1081.6            | 31476.6 | 40175.1 | 50292.3 | 60974.6 | 71819.3 | 89828.1 | 105579.1 |
| 3037.1            | 31488.1 | 40191.6 | 50315.4 | 60994.7 | 72002.6 | 89973.7 | 105833.0 |
| 3039.2            | 31539.5 | 40200.2 | 50320.1 | 60996.6 | 72040.3 | 90039.1 | 105915.8 |
| 3063.5            | 31598.5 | 40228.5 | 50321.6 | 61002.9 | 72052.4 | 90093.3 | 105936.0 |
| 3102.3            | 31616.7 | 40244.4 | 50349.8 | 61100.3 | 72058.1 | 90353.2 | 105940.7 |
| 3233.8            | 31619.6 | 40250.7 | 50408.7 | 61101.2 | 72547.1 | 90381.3 | 106053.0 |
| 3426.8            | 31635.0 | 40309.9 | 50453.8 | 61191.6 | 73838.6 | 90423.9 | 107064.1 |
| 3840.1            | 31662.5 | 40368.6 | 50458.7 | 61197.5 | 74019.9 | 90488.6 | 107072.0 |
| 5248.5            | 31806.2 | 40412.8 | 50473.7 | 61316.4 | 74136.1 | 90594.8 | 107100.6 |
| 5249.0            | 31824.0 | 40434.0 | 50494.8 | 61367.4 | 74371.8 | 90684.5 | 107121.3 |
| 5278.6            | 31876.1 | 40475.8 | 50509.1 | 61387.9 | 74417.2 | 90792.6 | 107154.1 |
| 5421.6            | 31952.4 | 41466.5 | 50527.0 | 61399.2 | 74429.2 | 90967.0 | 107189.2 |
| 5633.2            | 32259.7 | 41643.7 | 50582.2 | 61414.8 | 74444.8 | 90983.9 | 107214.9 |
| 5903.6            | 32264.2 | 41647.1 | 50619.7 | 61446.3 | 74457.3 | 90999.1 | 108794.3 |
| 6968.1            | 32441.3 | 41671.6 | 50668.2 | 61520.2 | 74468.2 | 91144.8 | 109113.5 |
| 6969.9            | 32474.3 | 41720.7 | 50678.1 | 61571.8 | 74495.9 | 91282.3 | 109124.5 |
| 7044.8            | 32488.2 | 42201.4 | 50743.4 | 61587.5 | 74501.9 | 91337.9 | 109155.8 |
| 7288.9            | 32815.0 | 42298.3 | 50777.4 | 61610.6 | 74505.6 | 91404.9 | 109178.3 |
| 7560.0            | 33138.5 | 42369.2 | 50851.3 | 61638.8 | 74519.5 | 91410.6 | 109272.0 |
| 8277.4            | 33247.9 | 42384.0 | 50861.4 | 61682.2 | 74523.7 | 91445.0 | 109307.0 |
| 8295.2            | 33258.2 | 42390.7 | 51028.0 | 61690.8 | 74539.4 | 91454.8 | 109360.7 |
| 8507.6            | 33344.4 | 42489.8 | 51046.8 | 61697.7 | 74544.5 | 91465.2 | 109547.5 |
| 8913.5            | 33392.6 | 42492.1 | 51104.0 | 61722.7 | 74608.1 | 91477.8 | 109558.2 |
| 9248.2            | 33394.3 | 42497.9 | 51171.7 | 61763.7 | 74840.1 | 91495.2 | 109730.6 |
| 9305.7            | 33400.6 | 42528.0 | 51637.2 | 61798.6 | 74844.5 | 91573.5 | 109890.9 |
| 9426.4            | 33432.7 | 42565.3 | 51669.7 | 61851.4 | 75076.6 | 91589.2 | 109915.1 |
| 9480.3            | 33437.6 | 42585.2 | 51692.9 | 61854.9 | 75083.9 | 91608.3 | 110014.2 |
| 9482.9            | 33451.4 | 42669.4 | 51849.6 | 61891.0 | 75087.0 | 91609.2 | 110134.5 |
| 9587.2            | 33486.4 | 42679.6 | 52045.5 | 61902.6 | 75119.2 | 91707.1 | 110327.0 |

Supporting Information

|         |         |         |         |         |         |          |          |
|---------|---------|---------|---------|---------|---------|----------|----------|
| 9702.1  | 33618.9 | 42753.2 | 52079.9 | 62455.2 | 75122.7 | 93390.9  | 110596.4 |
| 9773.5  | 33623.8 | 42784.0 | 52139.9 | 62464.9 | 75123.3 | 93900.4  | 110741.9 |
| 10042.3 | 33630.3 | 42843.8 | 52369.0 | 62644.6 | 75165.9 | 94128.1  | 112533.8 |
| 10783.3 | 33664.3 | 42860.0 | 52555.5 | 62767.1 | 75396.7 | 94147.7  | 112593.1 |
| 10947.0 | 33726.9 | 43896.2 | 52569.6 | 62814.6 | 76893.4 | 94173.0  | 112668.1 |
| 10962.5 | 33763.7 | 44056.8 | 52578.7 | 62853.5 | 76974.5 | 94613.0  | 112737.3 |
| 10966.7 | 33775.2 | 44243.9 | 52599.2 | 62897.2 | 77226.1 | 94974.3  | 113167.6 |
| 10969.5 | 33882.8 | 44422.3 | 52606.7 | 62926.9 | 77941.5 | 95285.3  | 113249.7 |
| 12514.4 | 33903.9 | 44580.7 | 52629.4 | 62961.1 | 78044.6 | 95514.9  | 113363.5 |
| 12539.1 | 34116.3 | 44581.4 | 52650.0 | 62968.8 | 79303.6 | 95640.8  | 113544.4 |
| 12635.8 | 34273.0 | 44617.6 | 52660.8 | 63038.8 | 79675.6 | 95694.4  | 113721.0 |
| 12660.6 | 34324.7 | 44714.7 | 52675.9 | 63081.9 | 80414.1 | 95716.2  | 113828.2 |
| 13804.7 | 35156.3 | 44724.6 | 52945.9 | 63087.0 | 80631.6 | 96473.0  | 113943.7 |
| 13868.7 | 35228.2 | 44741.3 | 53876.8 | 63125.2 | 80653.6 | 96825.1  | 114141.9 |
| 13906.1 | 35244.7 | 44753.6 | 53992.6 | 63184.4 | 80759.8 | 96941.6  | 114540.7 |
| 14633.7 | 35269.0 | 44763.2 | 54042.1 | 63229.6 | 80849.7 | 97074.2  | 114774.2 |
| 14716.4 | 35311.1 | 44769.8 | 54074.7 | 63290.3 | 80893.0 | 97104.8  | 114880.0 |
| 15189.8 | 35349.3 | 44799.6 | 54117.6 | 63325.2 | 80904.5 | 97178.8  | 115693.1 |
| 23559.5 | 35369.5 | 44840.7 | 54188.0 | 63355.0 | 80918.0 | 97393.4  | 115705.5 |
| 23613.5 | 35369.6 | 44862.4 | 54192.5 | 63366.6 | 80926.1 | 97409.9  | 115948.9 |
| 23782.8 | 35397.9 | 44879.7 | 54227.9 | 63415.7 | 80930.9 | 97480.9  | 117001.4 |
| 23856.0 | 35551.3 | 44886.4 | 54279.6 | 63416.2 | 80987.2 | 97651.0  | 117242.4 |
| 24049.5 | 35582.5 | 44911.1 | 54315.4 | 63485.5 | 81044.3 | 97657.9  | 117264.1 |
| 24495.3 | 35586.1 | 45017.1 | 54379.3 | 63524.7 | 81115.1 | 97772.0  | 117286.0 |
| 24519.6 | 35646.3 | 45199.5 | 54428.2 | 63551.7 | 81145.0 | 97819.1  | 117923.5 |
| 24565.5 | 35702.6 | 45369.2 | 54485.0 | 63576.5 | 81158.6 | 99401.3  | 119935.5 |
| 24579.8 | 35781.5 | 45455.9 | 54602.7 | 63614.2 | 81299.4 | 99637.3  | 120673.7 |
| 24632.2 | 35784.8 | 45482.8 | 54691.7 | 63746.1 | 81375.8 | 99900.4  | 124397.0 |
| 24653.3 | 35971.1 | 45493.6 | 54785.9 | 63746.6 | 81388.8 | 99908.6  | 124808.0 |
| 24836.4 | 36128.7 | 45525.6 | 54868.1 | 64632.1 | 81408.1 | 99924.8  | 125015.3 |
| 25119.9 | 36299.9 | 45556.5 | 54897.7 | 64801.4 | 81471.9 | 99949.0  | 125141.8 |
| 26167.5 | 36403.4 | 45560.0 | 55059.6 | 64883.2 | 81476.6 | 99983.5  | 125227.3 |
| 26283.1 | 36610.4 | 45886.0 | 55199.0 | 64913.8 | 81531.6 | 100023.1 | 125289.2 |
| 26397.4 | 36676.1 | 45953.4 | 55248.3 | 64920.3 | 81586.0 | 100028.5 | 125325.3 |
| 26472.1 | 36772.9 | 45968.7 | 55272.2 | 64930.2 | 81651.3 | 100088.1 | 125356.8 |
| 26488.7 | 36779.1 | 45996.6 | 55338.0 | 65267.2 | 81732.1 | 100140.7 | 125930.9 |
| 26494.7 | 36784.6 | 46082.6 | 55428.1 | 65517.3 | 81738.7 | 100161.2 | 126242.0 |
| 26536.7 | 36796.9 | 46103.6 | 55466.1 | 65520.1 | 82066.3 | 100220.1 | 126445.1 |
| 26565.8 | 36817.7 | 46108.4 | 55490.2 | 65708.0 | 82088.8 | 100981.1 | 126595.8 |
| 26593.0 | 36823.7 | 46144.5 | 55521.0 | 65743.7 | 82096.6 | 101030.4 | 126713.5 |
| 26671.8 | 36831.1 | 46231.2 | 55828.2 | 65747.1 | 82215.0 | 101140.7 | 126801.0 |
| 26719.8 | 37054.7 | 46356.3 | 56074.8 | 65758.1 | 82553.3 | 101209.1 | 126849.2 |
| 26729.5 | 37292.8 | 46377.0 | 56211.0 | 65774.3 | 83814.6 | 101220.6 | 127785.1 |
| 26766.2 | 37303.1 | 46381.0 | 56244.0 | 65779.5 | 83985.2 | 101224.1 | 127926.2 |
| 26880.0 | 37307.2 | 46473.9 | 56248.4 | 65818.7 | 84073.7 | 101260.3 | 128444.3 |
| 27029.5 | 37325.7 | 46539.1 | 56258.2 | 65858.5 | 84140.4 | 101264.3 | 128940.4 |
| 27144.3 | 37328.2 | 46589.0 | 56265.6 | 65878.6 | 84251.2 | 101645.5 | 129663.9 |
| 27201.8 | 37400.9 | 46647.0 | 56267.6 | 65920.2 | 84324.4 | 101853.2 | 135875.9 |
| 27577.9 | 37406.9 | 46887.9 | 56274.9 | 65932.2 | 84325.3 | 101969.9 | 136249.9 |
| 27597.7 | 37414.5 | 47193.2 | 57088.5 | 66416.1 | 84354.5 | 102013.9 | 136775.6 |
| 27654.0 | 37486.3 | 47232.3 | 57229.2 | 66608.2 | 84369.3 | 102057.3 | 138787.3 |
| 27670.0 | 37674.2 | 47241.2 | 57262.9 | 66686.2 | 84380.2 | 102105.2 | 139167.3 |
| 27728.2 | 37752.3 | 47260.1 | 57349.7 | 66852.6 | 84417.8 | 102106.5 | 139650.4 |
| 27758.8 | 37771.9 | 47289.7 | 57463.6 | 66857.1 | 84441.6 | 102196.3 | 139963.8 |
| 27857.3 | 37793.6 | 47311.8 | 57464.5 | 66871.6 | 84510.6 | 102514.5 | 143780.4 |
| 28007.2 | 37816.0 | 47373.8 | 58287.0 | 66915.9 | 84527.5 | 102601.3 | 143835.1 |
| 28033.0 | 37968.7 | 47441.7 | 58526.0 | 67005.2 | 84548.1 | 102637.9 | 143936.0 |
| 28080.5 | 38177.1 | 47490.6 | 58752.0 | 67031.9 | 84550.4 | 102838.4 | 144100.9 |
| 28100.2 | 38195.4 | 47615.4 | 58771.6 | 67044.4 | 84567.8 | 103020.2 | 144290.2 |
| 28139.6 | 38268.8 | 47715.0 | 58789.8 | 67084.0 | 84674.4 | 103057.8 | 146455.6 |
| 28189.9 | 38279.6 | 47773.0 | 58827.2 | 67087.7 | 84677.0 | 103137.5 | 146562.6 |
| 28197.7 | 38283.6 | 48484.1 | 58832.6 | 67135.7 | 84691.0 | 103269.0 | 146737.1 |
| 28241.7 | 38326.0 | 48491.3 | 58845.7 | 67137.9 | 84784.4 | 103360.7 | 146836.7 |
| 28279.6 | 38374.5 | 48528.1 | 58848.4 | 67158.7 | 84788.4 | 103398.9 | 147121.6 |
| 28293.3 | 38417.9 | 48635.4 | 59024.6 | 67177.3 | 84801.6 | 103447.2 | 147261.5 |
| 28310.0 | 38630.6 | 48702.9 | 59106.2 | 67191.9 | 84863.8 | 103458.3 | 149358.2 |
| 28342.6 | 38632.3 | 48723.4 | 59190.2 | 67202.7 | 84896.4 | 103465.4 | 149919.6 |
| 28351.5 | 38641.9 | 48753.6 | 59216.3 | 67231.4 | 85030.5 | 103492.5 | 149955.1 |
| 28409.2 | 38647.6 | 48809.9 | 59219.0 | 67235.1 | 85042.3 | 103569.8 | 150038.1 |
| 28409.8 | 38648.1 | 48873.8 | 59238.2 | 67239.1 | 85205.0 | 103752.4 | 150064.8 |
| 28417.9 | 38680.4 | 48883.4 | 59348.7 | 67614.1 | 85268.1 | 103850.9 | 150154.0 |
| 28448.5 | 38724.1 | 48886.4 | 59679.7 | 67927.5 | 85280.2 | 103857.7 | 150553.7 |
| 28449.9 | 38749.9 | 48895.6 | 59714.7 | 68060.2 | 85333.6 | 103860.6 | 153421.0 |
| 28504.7 | 38752.4 | 48913.3 | 59772.4 | 68076.2 | 85421.2 | 103888.7 | 153457.0 |
| 28523.8 | 38772.7 | 49017.0 | 59856.6 | 68077.7 | 85428.2 | 103925.4 | 153553.9 |
| 28582.9 | 38774.7 | 49130.9 | 59888.9 | 68091.6 | 85490.5 | 103951.2 | 153579.3 |
| 28599.3 | 38789.3 | 49197.2 | 59912.3 | 68102.6 | 85528.9 | 103964.0 | 154145.0 |

## Supporting Information

|         |         |         |         |         |         |          |          |
|---------|---------|---------|---------|---------|---------|----------|----------|
| 28610.6 | 38925.6 | 49227.9 | 59927.9 | 68765.7 | 85553.5 | 104006.6 | 177202.8 |
| 29734.0 | 39033.4 | 49420.4 | 59963.2 | 68828.7 | 85570.4 | 104048.8 | 178351.6 |
| 29741.6 | 39090.5 | 49479.8 | 59974.8 | 69083.1 | 85579.7 | 104053.8 | 178996.5 |
| 29764.1 | 39119.2 | 49592.8 | 60021.1 | 69163.7 | 86099.4 | 104150.5 | 181492.1 |
| 29795.9 | 39179.7 | 49602.3 | 60073.6 | 69283.3 | 86155.3 | 104184.6 | 181819.0 |
| 29804.6 | 39225.0 | 49607.2 | 60098.9 | 69293.7 | 86299.9 | 104227.4 | 181914.0 |
| 29927.8 | 39228.1 | 49629.2 | 60290.3 | 69352.7 | 86819.4 | 104273.7 | 181922.9 |
| 30018.4 | 39251.3 | 49682.2 | 60309.6 | 69471.6 | 87015.2 | 104310.9 | 182187.5 |
| 30030.3 | 39433.5 | 49685.9 | 60319.4 | 69683.1 | 88670.9 | 104319.4 | 183057.3 |
| 30098.8 | 39525.8 | 49715.3 | 60389.1 | 69776.2 | 88715.4 | 104348.4 | 185008.0 |
| 30125.9 | 39591.6 | 49725.1 | 60436.0 | 69785.8 | 88981.2 | 104421.3 | 185042.1 |
| 30224.5 | 39656.9 | 49805.8 | 60503.7 | 69851.5 | 89040.6 | 104513.4 | 185362.1 |
| 30256.6 |         |         |         |         |         |          |          |

**Table S35:** NEVPT2 computed the spin-orbit states for  $[\text{Dy}(\text{C}_9\text{H}_9)_2]^+$  complex. All the values are reported here in  $\text{cm}^{-1}$ .

| 6                 |         |         |         |         |         |         |          |
|-------------------|---------|---------|---------|---------|---------|---------|----------|
| Spin Orbit States |         |         |         |         |         |         |          |
| NEVPT2            |         |         |         |         |         |         |          |
| 0.0               | 30597.6 | 39288.9 | 48895.5 | 58336.2 | 66267.4 | 82607.4 | 97765.7  |
| 29.0              | 30622.8 | 39295.8 | 48981.6 | 58381.1 | 66624.8 | 82651.6 | 97836.4  |
| 73.0              | 30705.0 | 39310.9 | 49033.3 | 58525.1 | 66681.4 | 82669.8 | 97857.7  |
| 105.5             | 30827.7 | 39350.2 | 49474.2 | 58540.4 | 66722.1 | 82811.2 | 97861.4  |
| 120.4             | 30904.3 | 39354.0 | 49565.9 | 58567.1 | 66732.6 | 82954.9 | 97865.5  |
| 171.8             | 31060.8 | 39372.0 | 49573.8 | 58571.7 | 66809.3 | 83083.9 | 97940.4  |
| 408.0             | 31072.7 | 39404.8 | 49690.0 | 58593.1 | 66809.8 | 83147.5 | 98102.8  |
| 1329.5            | 31108.9 | 39442.6 | 49714.3 | 58613.8 | 67600.7 | 83158.7 | 98109.9  |
| 3041.6            | 31111.8 | 39478.9 | 49749.8 | 58644.1 | 67731.8 | 83356.2 | 98127.8  |
| 3063.1            | 31162.4 | 39509.0 | 49771.1 | 58645.2 | 67851.7 | 83456.7 | 98180.6  |
| 3106.8            | 31237.7 | 39512.6 | 49782.7 | 58671.0 | 68038.6 | 83530.4 | 98281.5  |
| 3118.7            | 31255.5 | 39540.5 | 49837.6 | 58688.0 | 68115.3 | 83588.3 | 98285.4  |
| 3280.7            | 31330.8 | 39555.9 | 49943.4 | 58712.6 | 68230.6 | 83806.7 | 98343.5  |
| 3497.0            | 31469.1 | 39608.1 | 50015.8 | 58717.9 | 68243.6 | 83831.7 | 98809.0  |
| 4028.6            | 31483.2 | 39611.4 | 50040.5 | 58731.6 | 68253.4 | 83907.3 | 99043.8  |
| 5247.2            | 31545.6 | 39674.8 | 50063.3 | 58827.9 | 68259.9 | 83923.1 | 99330.0  |
| 5250.8            | 31549.1 | 39709.3 | 50129.1 | 58830.5 | 68288.2 | 83974.1 | 99478.3  |
| 5259.7            | 31585.2 | 39757.7 | 50268.2 | 58902.5 | 68399.0 | 84003.1 | 99631.6  |
| 5430.9            | 31643.0 | 39768.9 | 51580.4 | 58909.8 | 68685.3 | 84016.6 | 99659.8  |
| 5688.2            | 31700.9 | 40139.7 | 51676.5 | 58960.9 | 69211.8 | 84081.0 | 99820.4  |
| 6028.5            | 31840.7 | 40185.1 | 51697.9 | 59059.9 | 70115.0 | 84213.0 | 99836.2  |
| 6931.6            | 31941.8 | 40201.3 | 51711.2 | 59228.5 | 70434.6 | 84258.7 | 99856.7  |
| 6969.1            | 32064.3 | 40325.3 | 51809.0 | 59290.3 | 70474.2 | 84286.7 | 99887.1  |
| 7010.9            | 32331.4 | 40332.8 | 51842.0 | 59329.6 | 70486.9 | 84307.8 | 99893.8  |
| 7316.8            | 32343.1 | 40381.0 | 51851.5 | 59355.4 | 70513.1 | 84350.9 | 99906.5  |
| 7654.4            | 32446.5 | 40432.8 | 51883.1 | 59382.8 | 70737.5 | 84361.7 | 99945.3  |
| 8207.5            | 32510.8 | 40493.1 | 51887.7 | 59389.4 | 70791.7 | 84367.3 | 99994.3  |
| 8208.9            | 32535.4 | 40561.8 | 51921.5 | 59407.1 | 71094.2 | 84614.2 | 100541.3 |
| 8264.3            | 32563.2 | 40611.6 | 51962.3 | 59464.0 | 71273.1 | 84678.0 | 100593.5 |
| 8276.1            | 32638.3 | 40680.1 | 51975.4 | 59473.9 | 71320.3 | 84818.8 | 100632.8 |
| 8290.0            | 32689.1 | 40705.4 | 52000.1 | 59487.2 | 71354.0 | 84835.3 | 100662.5 |
| 8367.0            | 32695.8 | 40736.8 | 52010.3 | 59592.6 | 71369.9 | 84870.6 | 100703.1 |
| 8523.4            | 32727.5 | 40868.6 | 52066.8 | 59613.3 | 71445.4 | 84899.6 | 100730.0 |
| 8528.2            | 32753.7 | 41012.2 | 52111.2 | 59634.9 | 71451.2 | 84941.2 | 100809.6 |
| 8628.5            | 32784.4 | 41493.6 | 52141.6 | 59666.5 | 71463.2 | 85039.5 | 100812.6 |
| 9009.9            | 32962.2 | 41543.3 | 52151.7 | 59674.5 | 71486.8 | 85155.9 | 101080.9 |
| 9206.7            | 32992.9 | 41972.3 | 52190.2 | 59680.2 | 71773.0 | 86125.2 | 101354.4 |
| 9254.2            | 33216.1 | 42112.5 | 52209.1 | 59682.8 | 71853.4 | 86699.9 | 101529.8 |
| 9582.1            | 33290.1 | 43159.5 | 52215.5 | 59706.9 | 71857.3 | 86919.0 | 102998.3 |
| 9791.1            | 33328.9 | 43196.6 | 52217.2 | 59730.2 | 71886.3 | 86948.7 | 103018.0 |
| 9797.2            | 33609.1 | 43302.3 | 52280.0 | 59770.6 | 71911.4 | 86973.9 | 103148.8 |
| 9806.0            | 33784.7 | 43346.4 | 52350.5 | 59823.7 | 71935.8 | 88092.0 | 103256.1 |
| 9809.9            | 33797.4 | 43477.1 | 52392.4 | 59829.7 | 71985.7 | 88416.9 | 104237.0 |
| 10151.8           | 33818.3 | 43605.9 | 52422.3 | 59846.9 | 71991.7 | 88751.5 | 104305.6 |
| 11322.5           | 33824.4 | 43635.7 | 52425.0 | 59867.2 | 72034.8 | 88761.6 | 104324.4 |
| 11343.3           | 33832.2 | 43652.1 | 52608.1 | 59917.5 | 72784.7 | 88875.4 | 104450.1 |
| 11479.9           | 33891.3 | 43693.2 | 52646.6 | 59935.4 | 72932.9 | 88916.8 | 104498.1 |
| 11497.7           | 33909.3 | 43726.8 | 52696.0 | 59980.9 | 74128.1 | 89023.2 | 104522.1 |
| 12591.1           | 33916.8 | 43750.9 | 52702.6 | 60046.6 | 74311.1 | 89146.1 | 104744.6 |
| 12673.7           | 34057.2 | 43760.3 | 52726.7 | 60051.0 | 74319.4 | 89178.0 | 104890.5 |
| 12712.9           | 34288.9 | 43904.0 | 52806.6 | 60241.5 | 74631.8 | 89190.3 | 104949.0 |
| 13395.8           | 34483.0 | 43992.1 | 52861.6 | 60430.9 | 74733.7 | 89362.3 | 105214.9 |
| 13502.7           | 34573.7 | 44042.1 | 52941.2 | 60524.6 | 74750.1 | 89437.7 | 105324.8 |
| 13961.3           | 34599.6 | 44063.7 | 52999.5 | 60526.8 | 74759.8 | 89880.5 | 106273.5 |
| 22443.9           | 34646.1 | 44085.0 | 53502.1 | 60528.9 | 74762.6 | 89955.8 | 106309.8 |
| 22486.7           | 34667.2 | 44291.5 | 54113.5 | 60536.0 | 74784.8 | 90283.7 | 106618.1 |

## Supporting Information

|          |         |         |         |         |         |         |          |
|----------|---------|---------|---------|---------|---------|---------|----------|
| 22567.7  | 34697.2 | 44405.0 | 54127.3 | 60544.5 | 74793.7 | 90582.8 | 107635.2 |
| 22654.9  | 34716.2 | 44752.6 | 54156.0 | 61089.2 | 74834.1 | 90988.0 | 107842.3 |
| 22816.7  | 34718.3 | 44809.4 | 54167.5 | 61247.8 | 74875.0 | 91250.1 | 107854.2 |
| 24014.4  | 34738.1 | 44873.6 | 54259.2 | 61287.4 | 74877.2 | 91350.5 | 107880.8 |
| 24055.3  | 34758.3 | 45065.4 | 54299.7 | 61335.3 | 74881.4 | 91388.8 | 107972.2 |
| 24075.4  | 34767.2 | 45627.7 | 54419.1 | 61348.7 | 74893.9 | 91730.4 | 109852.6 |
| 24180.5  | 34798.4 | 45673.5 | 54483.7 | 61444.6 | 74956.5 | 92268.0 | 110589.1 |
| 24237.7  | 35077.1 | 45740.4 | 54500.6 | 61504.4 | 74983.5 | 92304.0 | 115437.6 |
| 24534.8  | 35190.2 | 45749.8 | 54567.4 | 61537.2 | 75009.2 | 92334.0 | 115895.0 |
| 24743.5  | 35415.5 | 45750.7 | 54746.4 | 61659.6 | 75069.6 | 92459.4 | 116091.5 |
| 24867.3  | 35451.3 | 45801.4 | 54903.9 | 61679.9 | 75231.2 | 92494.2 | 116213.2 |
| 24958.8  | 35532.9 | 45825.7 | 54907.8 | 61739.5 | 75279.5 | 92781.1 | 116301.6 |
| 25028.2  | 35540.4 | 45847.4 | 54909.2 | 61774.7 | 75333.4 | 92794.2 | 116354.3 |
| 25128.4  | 35552.6 | 45912.0 | 54985.7 | 61777.6 | 75362.9 | 93096.9 | 116386.8 |
| 25195.7  | 35634.2 | 45956.6 | 54994.5 | 61778.8 | 75368.4 | 93217.1 | 116443.0 |
| 25290.5  | 35688.4 | 45963.0 | 55015.5 | 62029.3 | 75427.4 | 93234.5 | 116721.6 |
| 245308.7 | 35720.6 | 45976.3 | 55039.2 | 62258.4 | 75442.6 | 93244.1 | 116860.5 |
| 26776.0  | 35726.1 | 46015.2 | 55045.2 | 62259.9 | 75561.1 | 93615.7 | 116980.6 |
| 26793.5  | 35823.5 | 46034.6 | 55057.1 | 62322.9 | 75592.0 | 93641.6 | 117285.1 |
| 26860.4  | 35958.9 | 46062.3 | 55077.6 | 62384.2 | 75605.2 | 93649.4 | 117400.4 |
| 26977.4  | 35961.9 | 46105.2 | 55113.3 | 62405.0 | 75619.1 | 93653.3 | 117483.8 |
| 27093.7  | 36096.0 | 46121.4 | 55120.9 | 62429.1 | 75672.8 | 93760.2 | 117635.4 |
| 27153.2  | 36126.2 | 46187.0 | 55170.7 | 62490.4 | 77183.9 | 93800.6 | 117767.2 |
| 27163.2  | 36163.9 | 46263.9 | 55209.2 | 62528.8 | 77578.0 | 93809.8 | 117838.3 |
| 27264.6  | 36201.6 | 46332.6 | 55213.7 | 62551.2 | 77769.4 | 93885.2 | 117878.6 |
| 27413.7  | 36252.9 | 46347.7 | 55402.6 | 62700.5 | 78002.2 | 93894.8 | 117947.7 |
| 27554.2  | 36371.6 | 46371.2 | 55566.8 | 62760.8 | 78081.5 | 93918.2 | 118600.6 |
| 27722.9  | 36381.1 | 46465.2 | 55662.3 | 62945.4 | 78237.5 | 93956.6 | 123154.2 |
| 28104.3  | 36860.3 | 46593.7 | 55670.1 | 62950.6 | 78311.1 | 93961.0 | 123481.1 |
| 28135.5  | 36871.4 | 46720.9 | 55685.8 | 62977.8 | 78346.1 | 93974.6 | 124113.3 |
| 28344.8  | 36894.2 | 46728.1 | 55687.5 | 62990.9 | 78396.6 | 93997.1 | 126101.2 |
| 28454.1  | 36957.6 | 46742.0 | 55746.7 | 63016.6 | 78818.0 | 94109.2 | 126433.2 |
| 28526.0  | 36965.8 | 46807.7 | 55820.7 | 63208.4 | 79131.3 | 94209.8 | 126988.1 |
| 28539.5  | 36965.8 | 46831.7 | 55827.2 | 63249.2 | 79347.6 | 94680.7 | 127396.6 |
| 28563.5  | 37049.7 | 46838.1 | 55887.7 | 63282.2 | 79454.7 | 94869.7 | 131785.9 |
| 28609.8  | 37063.9 | 46883.4 | 55957.2 | 63395.7 | 79483.5 | 94913.6 | 131835.3 |
| 28639.1  | 37141.7 | 46910.8 | 56031.2 | 63610.2 | 79498.5 | 94925.7 | 131942.2 |
| 28752.3  | 37167.2 | 47013.4 | 56082.0 | 63676.7 | 79523.1 | 94968.1 | 132144.5 |
| 28801.7  | 37167.5 | 47043.9 | 56151.7 | 63901.0 | 79556.2 | 95276.6 | 132353.3 |
| 28836.7  | 37282.2 | 47049.4 | 56193.4 | 63922.8 | 79641.3 | 95630.3 | 133490.2 |
| 28876.2  | 37444.8 | 47052.7 | 56196.2 | 64001.8 | 79663.9 | 95692.4 | 134098.2 |
| 28913.6  | 37555.7 | 47056.0 | 56291.8 | 64043.0 | 79798.8 | 95699.4 | 134517.1 |
| 28962.8  | 37579.6 | 47102.7 | 56317.0 | 64084.0 | 79973.2 | 95772.0 | 134610.4 |
| 29020.5  | 37629.8 | 47149.9 | 56353.5 | 64122.7 | 79985.5 | 95898.7 | 134918.0 |
| 29115.0  | 37638.6 | 47164.0 | 56381.3 | 64138.1 | 80004.5 | 95955.5 | 135222.1 |
| 29128.6  | 37647.5 | 47179.3 | 56447.6 | 64143.3 | 80100.5 | 95982.2 | 136206.1 |
| 29152.5  | 37651.7 | 47210.0 | 56501.3 | 64166.1 | 80111.5 | 96047.7 | 137234.2 |
| 29160.6  | 37660.4 | 47233.4 | 56541.2 | 64180.3 | 80187.5 | 96079.4 | 137274.2 |
| 29204.6  | 37661.8 | 47320.1 | 56625.2 | 64292.7 | 80611.0 | 96113.8 | 137363.6 |
| 29213.3  | 37691.6 | 47362.3 | 56649.8 | 64375.5 | 80697.9 | 96131.6 | 137411.6 |
| 29409.3  | 37721.3 | 47371.7 | 56770.3 | 64382.9 | 80706.2 | 96480.8 | 137524.1 |
| 29425.1  | 37779.5 | 47385.3 | 56785.0 | 64401.2 | 80896.4 | 96495.4 | 138030.9 |
| 29454.1  | 37793.1 | 47428.3 | 56878.1 | 64411.5 | 81084.7 | 96602.0 | 140779.3 |
| 29512.9  | 37898.6 | 47476.3 | 56878.3 | 64466.6 | 81260.1 | 96639.9 | 140834.4 |
| 29693.2  | 37917.2 | 47504.8 | 56989.0 | 64468.9 | 81418.9 | 96644.5 | 140930.0 |
| 29720.6  | 37937.7 | 47507.0 | 57048.5 | 64537.0 | 81500.1 | 96648.8 | 140962.5 |
| 29793.3  | 37985.5 | 47528.7 | 57152.9 | 64727.8 | 81536.2 | 96705.3 | 141636.9 |
| 29868.8  | 38019.7 | 47539.8 | 57177.2 | 64830.9 | 81579.7 | 96706.0 | 160348.5 |
| 29921.0  | 38057.0 | 47547.6 | 57450.5 | 64834.1 | 81613.7 | 96738.2 | 161474.9 |
| 29924.3  | 38173.0 | 47557.7 | 57842.6 | 64844.7 | 81629.8 | 96739.5 | 162117.0 |
| 29942.3  | 38261.9 | 47581.8 | 57945.1 | 64855.1 | 81789.4 | 96842.7 | 164215.2 |
| 29948.8  | 38313.1 | 47601.0 | 58028.9 | 64859.8 | 81849.8 | 96910.0 | 164370.0 |
| 29978.8  | 38322.1 | 47625.3 | 58038.8 | 65225.6 | 81951.3 | 97462.6 | 164574.6 |
| 30141.3  | 38449.9 | 47778.4 | 58044.6 | 65380.6 | 82108.0 | 97471.3 | 164581.8 |
| 30219.3  | 38521.7 | 47867.2 | 58061.2 | 65416.8 | 82125.2 | 97605.8 | 164879.2 |
| 30249.7  | 39108.4 | 47939.6 | 58065.2 | 65457.8 | 82179.5 | 97614.8 | 166075.2 |
| 30316.4  | 39130.4 | 48690.5 | 58148.7 | 65486.0 | 82304.0 | 97654.9 | 167487.7 |
| 30360.3  | 39154.2 | 48704.4 | 58250.7 | 65616.8 | 82351.7 | 97687.2 | 167650.2 |
| 30398.4  | 39230.2 | 48777.7 | 58276.3 | 65651.8 | 82512.9 | 97736.8 | 167946.1 |
| 30523.2  | 39264.9 |         |         |         |         |         |          |

**Table S36:** NEVPT2 computed the eight low lying Kramer Doublets for  $1_Q - 6_Q$ . All the values are reported here in  $\text{cm}^{-1}$ .

Spin Orbit States

| NEVPT2     |                |                |                |                |                |                |
|------------|----------------|----------------|----------------|----------------|----------------|----------------|
|            | 1 <sub>Q</sub> | 2 <sub>Q</sub> | 3 <sub>Q</sub> | 4 <sub>Q</sub> | 5 <sub>Q</sub> | 6 <sub>Q</sub> |
| <b>KD1</b> | 0.00           | 0.0            | 0.00           | 0.00           | 0.00           | 0.00           |
| <b>KD2</b> | 249.35         | 138.4          | 94.70          | 174.24         | 122.23         | 32.11          |
| <b>KD3</b> | 458.34         | 258.6          | 175.69         | 323.82         | 241.85         | 71.80          |
| <b>KD4</b> | 628.11         | 360.2          | 244.15         | 450.10         | 355.30         | 113.84         |
| <b>KD5</b> | 760.97         | 442.4          | 300.66         | 553.21         | 457.62         | 154.10         |
| <b>KD6</b> | 858.70         | 502.6          | 344.09         | 631.17         | 542.19         | 187.85         |
| <b>KD7</b> | 922.61         | 543.0          | 372.46         | 686.84         | 602.22         | 213.69         |
| <b>KD8</b> | 954.46         | 591.8          | 392.03         | 733.54         | 634.60         | 226.74         |

Table S37: DFT-optimized geometry coordinates

| 1  |                 |                 |
|----|-----------------|-----------------|
| Dy | 0.000000000000  | 0.000000000000  |
| Si | 2.078484935773  | -2.003997946204 |
| Si | -2.079447509189 | 2.003544441301  |
| Si | 2.079137940498  | -2.007359280089 |
| Si | -1.975262034051 | -2.102628647759 |
| Si | 1.983851639157  | 2.102186784756  |
| Si | 1.976745847057  | 2.105022645633  |
| Si | -1.975803382377 | -2.105952410060 |
| Si | -2.071575468433 | 2.007637098145  |
| C  | -0.739970772721 | 0.728853817074  |
| C  | 0.703554911154  | 0.765727946139  |
| C  | -0.703649633882 | -0.765519450303 |
| C  | 0.739970772721  | -0.728853817074 |
| C  | 0.709153077271  | 0.764146764519  |
| C  | 0.742297035908  | -0.730526546358 |
| C  | -0.734418115847 | 0.730526546358  |
| C  | -0.701345066962 | -0.763976369445 |
| H  | 1.581377415594  | -3.310560386961 |
| H  | 3.271561082064  | -1.557833261432 |
| H  | 2.600924170861  | -2.292117495435 |
| H  | -2.496205285057 | -2.405658295158 |
| H  | -3.182791598544 | -1.729126878578 |
| H  | -1.407217774467 | -3.386653958658 |
| H  | 1.413977484645  | 3.385808862591  |
| H  | 2.512452614133  | 2.406444123372  |
| H  | 3.186331265163  | 1.725702572600  |
| H  | 1.410864334890  | 3.388340975728  |
| H  | 3.183967430392  | 1.727227661432  |
| H  | 2.497250410124  | 2.412136483040  |
| H  | -3.180635201255 | -1.732585051901 |
| H  | -2.501126104295 | -2.410383847991 |
| H  | -1.404228452187 | -3.388753204805 |
| H  | 2.603518197736  | -2.295176669111 |
| H  | 3.271125040011  | -1.562025403598 |
| H  | 1.580782091189  | -3.314037610664 |
| H  | -3.270316986352 | 1.552063641886  |
| H  | -1.582710413084 | 3.308509295944  |
| H  | -2.604407215514 | 2.296963171504  |
| H  | -2.595657798879 | 2.300642540916  |
| H  | -1.573043403100 | 3.312084417438  |
| H  | -3.263715500170 | 1.558737096173  |

| 2  |                 |                 |
|----|-----------------|-----------------|
| Dy | 0.000000000000  | 0.000000000000  |
| C  | 1.157919000000  | 0.404148000000  |
| C  | 0.747885000000  | -0.967427000000 |
| C  | -0.696901000000 | -1.001636000000 |
| C  | -1.176609000000 | 0.346457000000  |
| C  | -0.032294000000 | 1.218458000000  |
| C  | 1.896266000000  | 0.917978000000  |
| C  | 0.662944000000  | 1.043876000000  |
| C  | 0.183298000000  | -0.271222000000 |
| C  | 1.105514000000  | -1.213948000000 |

Supporting Information

|   |                 |                 |                 |
|---|-----------------|-----------------|-----------------|
| C | 2.172199000000  | -0.476684000000 | 1.344925000000  |
| C | -2.617103000000 | 0.786715000000  | -2.271302000000 |
| H | -2.783443000000 | 1.712436000000  | -1.689377000000 |
| H | -2.955269000000 | 1.004736000000  | -3.302661000000 |
| H | -3.295835000000 | 0.011070000000  | -1.874795000000 |
| C | -1.531373000000 | -2.254130000000 | -2.273175000000 |
| H | -1.081418000000 | -3.068107000000 | -1.674450000000 |
| H | -2.555805000000 | -2.080543000000 | -1.899742000000 |
| H | -1.633186000000 | -2.649281000000 | -3.302750000000 |
| C | 1.643244000000  | -2.170482000000 | -2.389288000000 |
| H | 1.665690000000  | -2.551156000000 | -3.429030000000 |
| H | 2.682641000000  | -1.934846000000 | -2.108404000000 |
| H | 1.302013000000  | -3.011128000000 | -1.757142000000 |
| C | 2.561060000000  | 0.915460000000  | -2.461810000000 |
| H | 2.796225000000  | 1.051306000000  | -3.535155000000 |
| H | 2.711606000000  | 1.894306000000  | -1.975592000000 |
| H | 3.310217000000  | 0.215276000000  | -2.055784000000 |
| C | -0.064808000000 | 2.721842000000  | -2.302410000000 |
| H | -0.069919000000 | 3.088050000000  | -3.347899000000 |
| H | -0.969300000000 | 3.136995000000  | -1.822558000000 |
| H | 0.819200000000  | 3.171518000000  | -1.816014000000 |
| C | 3.416730000000  | -1.079621000000 | 0.756225000000  |
| H | 3.222435000000  | -2.050901000000 | 0.269752000000  |
| H | 3.888663000000  | -0.415355000000 | 0.013125000000  |
| H | 4.168787000000  | -1.263200000000 | 1.547787000000  |
| C | -1.053206000000 | -0.616762000000 | 3.339556000000  |
| H | -0.806267000000 | -0.793591000000 | 4.404134000000  |
| H | -1.802832000000 | 0.194081000000  | 3.320985000000  |
| H | -1.542895000000 | -1.539944000000 | 2.977849000000  |
| C | 0.032120000000  | 2.346987000000  | 2.663593000000  |
| H | 0.140358000000  | 3.131345000000  | 1.891307000000  |
| H | -1.042116000000 | 2.240120000000  | 2.895142000000  |
| H | 0.514028000000  | 2.745659000000  | 3.577643000000  |
| C | 2.774731000000  | 2.063313000000  | 1.090185000000  |
| H | 3.509378000000  | 1.760349000000  | 0.326677000000  |
| H | 2.198569000000  | 2.917110000000  | 0.687850000000  |
| H | 3.346182000000  | 2.452701000000  | 1.955172000000  |
| C | 1.018577000000  | -2.712386000000 | 2.078048000000  |
| H | 1.569017000000  | -3.079100000000 | 2.966700000000  |
| H | -0.021632000000 | -3.068016000000 | 2.186928000000  |
| H | 1.464688000000  | -3.217611000000 | 1.202572000000  |

3

|    |                 |                 |                 |
|----|-----------------|-----------------|-----------------|
| Dy | 0.000000000000  | 0.000000000000  | 0.000000000000  |
| C  | 1.435209000000  | 0.017739000000  | -2.301847000000 |
| H  | 2.535421000000  | 0.014424000000  | -2.319288000000 |
| C  | 0.712687000000  | -1.224133000000 | -2.407184000000 |
| H  | 1.268678000000  | -2.168207000000 | -2.525468000000 |
| C  | -0.715809000000 | -1.244391000000 | -2.355559000000 |
| C  | -1.436900000000 | -0.017457000000 | -2.335965000000 |
| H  | -2.536333000000 | -0.015020000000 | -2.377457000000 |
| C  | 0.715809000000  | 1.244391000000  | -2.366047000000 |
| H  | 1.253691000000  | 2.202688000000  | -2.427420000000 |
| C  | -0.712404000000 | 1.223636000000  | -2.437184000000 |
| H  | -1.266326000000 | 2.166869000000  | -2.569872000000 |
| C  | 1.469076000000  | 0.005703000000  | 2.309936000000  |
| H  | 2.569011000000  | -0.006132000000 | 2.332174000000  |
| C  | 0.758634000000  | 1.238623000000  | 2.345215000000  |
| H  | 1.304174000000  | 2.193635000000  | 2.390558000000  |
| C  | -0.668857000000 | 1.230511000000  | 2.417806000000  |
| C  | -1.403374000000 | -0.005977000000 | 2.324928000000  |
| H  | -2.503148000000 | 0.006889000000  | 2.359674000000  |
| C  | 0.735562000000  | -1.229850000000 | 2.425739000000  |
| H  | 1.284141000000  | -2.176944000000 | 2.552744000000  |
| C  | -0.693257000000 | -1.238623000000 | 2.379105000000  |
| H  | -1.238299000000 | -2.192192000000 | 2.451158000000  |
| H  | -1.215302000000 | 2.179098000000  | 2.543882000000  |
| H  | -1.252564000000 | -2.203965000000 | -2.408387000000 |

4

|    |                 |                |                |
|----|-----------------|----------------|----------------|
| Dy | 0.000000000000  | 0.000000000000 | 0.000000000000 |
| C  | 1.167466000000  | 1.437299000000 | 1.850307000000 |
| C  | -0.211822000000 | 1.491501000000 | 2.187822000000 |
| C  | -1.133357000000 | 0.446522000000 | 2.296666000000 |

## Supporting Information

|   |                 |                 |                 |
|---|-----------------|-----------------|-----------------|
| C | -0.866773000000 | -0.971332000000 | 2.282371000000  |
| C | -0.797778000000 | -1.415621000000 | -2.112860000000 |
| C | 0.602633000000  | -1.515388000000 | -2.051939000000 |
| C | -1.612420000000 | -0.263394000000 | -2.002659000000 |
| C | 1.995264000000  | 0.285421000000  | 1.762404000000  |
| C | 1.563474000000  | -0.455175000000 | -2.100195000000 |
| C | -1.193547000000 | 1.106116000000  | -2.091085000000 |
| C | 1.622036000000  | -1.066016000000 | 1.760000000000  |
| C | 1.346085000000  | 0.918179000000  | -2.062210000000 |
| C | 0.091553000000  | 1.625283000000  | -2.064384000000 |
| C | 0.330820000000  | -1.623395000000 | 2.054938000000  |
| H | 0.162449000000  | 2.697021000000  | -1.994600000000 |
| H | 2.223465000000  | 1.539353000000  | -1.979562000000 |
| H | 2.592753000000  | -0.769268000000 | -2.019916000000 |
| H | 0.999528000000  | -2.514132000000 | -1.993504000000 |
| H | -1.321355000000 | -2.355258000000 | -2.050622000000 |
| H | -2.674786000000 | -0.434351000000 | -1.956774000000 |
| H | -1.984295000000 | 1.835110000000  | -2.022147000000 |
| H | 1.648014000000  | 2.387608000000  | 1.692008000000  |
| H | 3.020300000000  | 0.481765000000  | 1.486188000000  |
| H | 2.396561000000  | -1.780297000000 | 1.534790000000  |
| H | 0.270296000000  | -2.696393000000 | 1.989338000000  |
| H | -1.731115000000 | -1.607405000000 | 2.379291000000  |
| H | -2.161039000000 | 0.733954000000  | 2.443029000000  |
| H | -0.634406000000 | 2.482215000000  | 2.202953000000  |

5

|    |                 |                 |                 |
|----|-----------------|-----------------|-----------------|
| Dy | 0.000000000000  | 0.000000000000  | 0.000000000000  |
| C  | -0.779857000000 | -1.686901000000 | -1.914212000000 |
| H  | -1.238816000000 | -2.678957000000 | -1.798256000000 |
| C  | -1.744006000000 | -0.641330000000 | -1.909224000000 |
| H  | -2.769418000000 | -1.018862000000 | -1.790152000000 |
| C  | -1.686555000000 | 0.780105000000  | -1.908189000000 |
| H  | -2.678110000000 | 1.239061000000  | -1.788431000000 |
| C  | -0.641125000000 | 1.744480000000  | -1.913398000000 |
| H  | -1.018244000000 | 2.770377000000  | -1.796925000000 |
| C  | 0.779826000000  | 1.686934000000  | -1.914889000000 |
| H  | 1.238960000000  | 2.678997000000  | -1.799736000000 |
| C  | 1.743879000000  | 0.641306000000  | -1.910521000000 |
| H  | 2.769387000000  | 1.018966000000  | -1.792607000000 |
| C  | 1.686555000000  | -0.780105000000 | -1.909665000000 |
| H  | 2.678209000000  | -1.239020000000 | -1.790564000000 |
| C  | 0.641119000000  | -1.744439000000 | -1.913880000000 |
| H  | 1.018289000000  | -2.770334000000 | -1.797482000000 |
| C  | 0.739310000000  | 1.705771000000  | 1.914009000000  |
| H  | 1.173493000000  | 2.708871000000  | 1.797710000000  |
| C  | 1.729047000000  | 0.684333000000  | 1.908877000000  |
| H  | 2.744793000000  | 1.087280000000  | 1.790183000000  |
| C  | 1.706992000000  | -0.738068000000 | 1.908681000000  |
| H  | 2.709614000000  | -1.172354000000 | 1.789076000000  |
| C  | 0.685798000000  | -1.727969000000 | 1.913646000000  |
| H  | 1.088194000000  | -2.744229000000 | 1.797258000000  |
| C  | -0.736141000000 | -1.705735000000 | 1.914583000000  |
| H  | -1.170399000000 | -2.708900000000 | 1.799144000000  |
| C  | -1.725933000000 | -0.684338000000 | 1.910615000000  |
| H  | -2.741777000000 | -1.087205000000 | 1.792570000000  |
| C  | -1.703759000000 | 0.738068000000  | 1.910427000000  |
| H  | -2.706570000000 | 1.172219000000  | 1.791844000000  |
| C  | -0.682644000000 | 1.728047000000  | 1.914507000000  |
| H  | -1.085343000000 | 2.744184000000  | 1.798008000000  |

6

|    |                 |                 |                 |
|----|-----------------|-----------------|-----------------|
| Dy | 0.000000000000  | 0.000000000000  | 0.000000000000  |
| C  | -0.036037000000 | 2.066538000000  | -1.806997000000 |
| H  | -0.054019000000 | 3.160044000000  | -1.712554000000 |
| C  | -1.357550000000 | 1.562392000000  | -1.810024000000 |
| H  | -2.074476000000 | 2.388197000000  | -1.717621000000 |
| C  | -2.041239000000 | 0.325371000000  | -1.804740000000 |
| H  | -3.121393000000 | 0.495688000000  | -1.708689000000 |
| C  | -1.773027000000 | -1.066882000000 | -1.810272000000 |
| H  | -2.711611000000 | -1.628293000000 | -1.718492000000 |
| C  | -0.676345000000 | -1.953957000000 | -1.808778000000 |
| H  | -1.030608000000 | -2.988741000000 | -1.716283000000 |
| C  | 0.743287000000  | -1.930327000000 | -1.809896000000 |

## Supporting Information

|   |                 |                 |                 |
|---|-----------------|-----------------|-----------------|
| H | 1.132486000000  | -2.952461000000 | -1.717877000000 |
| C | 1.807565000000  | -1.006022000000 | -1.809978000000 |
| H | 2.765141000000  | -1.534359000000 | -1.717414000000 |
| C | 2.029119000000  | 0.396086000000  | -1.808287000000 |
| H | 3.103173000000  | 0.602376000000  | -1.714831000000 |
| C | 1.304227000000  | 1.606800000000  | -1.812462000000 |
| H | 1.991729000000  | 2.457507000000  | -1.722131000000 |
| C | 0.039603000000  | -2.066538000000 | 1.805657000000  |
| H | 0.057103000000  | -3.159923000000 | 1.709737000000  |
| C | 1.361257000000  | -1.562790000000 | 1.808276000000  |
| H | 2.077852000000  | -2.388766000000 | 1.714844000000  |
| C | 2.045247000000  | -0.325988000000 | 1.803414000000  |
| H | 3.125349000000  | -0.496571000000 | 1.707252000000  |
| C | 1.777380000000  | 1.066305000000  | 1.808471000000  |
| H | 2.716063000000  | 1.627414000000  | 1.715825000000  |
| C | 0.681041000000  | 1.953749000000  | 1.807108000000  |
| H | 1.035512000000  | 2.988334000000  | 1.713214000000  |
| C | -0.738599000000 | 1.930600000000  | 1.810260000000  |
| H | -1.127657000000 | 2.952766000000  | 1.718009000000  |
| C | -1.803159000000 | 1.006584000000  | 1.813157000000  |
| H | -2.760791000000 | 1.535154000000  | 1.722518000000  |
| C | -2.025110000000 | -0.395487000000 | 1.812124000000  |
| H | -3.099441000000 | -0.601464000000 | 1.721187000000  |
| C | -1.300539000000 | -1.606434000000 | 1.813859000000  |
| H | -1.988453000000 | -2.456861000000 | 1.724047000000  |

## EDA Input File

```
#!/bin/sh
```

```
# dependency: D:/ADF_DATA/Homoleptic/Dy55/Dy55.Region_1 Dy55.Region_1.results/adf.rkf Region_1.rkf
```

```
# dependency: D:/ADF_DATA/Homoleptic/Dy55/Dy55.Region_2 Dy55.Region_2.results/adf.rkf Region_2.rkf
```

```
"$AMSBIN/ams" << eor
```

```
Task SinglePoint
```

```
System
```

```
Atoms
```

```
Dy 0.0 0.0 0.0 region=Region_1 adf.f=Region_1
C 1.157919 0.404148 -2.293779 region=Region_2 adf.f=Region_2
C 0.747885 -0.967427 -2.285179 region=Region_2 adf.f=Region_2
C -0.696901 -1.001636 -2.261709 region=Region_2 adf.f=Region_2
C -1.176609 0.346457 -2.260421 region=Region_2 adf.f=Region_2
C -0.032294 1.218458 -2.264046 region=Region_2 adf.f=Region_2
C 1.896266 0.917978 1.51 region=Region_1 adf.f=Region_1
C 0.662944 1.043876 2.252933 region=Region_1 adf.f=Region_1
C 0.183298 -0.271222 2.551573 region=Region_1 adf.f=Region_1
C 1.105514 -1.213948 1.97816 region=Region_1 adf.f=Region_1
C 2.172199 -0.476684 1.344925 region=Region_1 adf.f=Region_1
C -2.617103 0.7867150000000001 -2.271302 region=Region_2 adf.f=Region_2
H -2.783443 1.712436 -1.689377 region=Region_2 adf.f=Region_2
H -2.955269 1.004736 -3.302661 region=Region_2 adf.f=Region_2
H -3.295835 0.01107 -1.874795 region=Region_2 adf.f=Region_2
C -1.531373 -2.25413 -2.273175 region=Region_2 adf.f=Region_2
H -1.081418 -3.068107 -1.67445 region=Region_2 adf.f=Region_2
H -2.555805 -2.080543 -1.899742 region=Region_2 adf.f=Region_2
H -1.633186 -2.649281 -3.30275 region=Region_2 adf.f=Region_2
C 1.643244 -2.170482 -2.389288 region=Region_2 adf.f=Region_2
H 1.66569 -2.551156 -3.42903 region=Region_2 adf.f=Region_2
H 2.682641 -1.934846 -2.108404 region=Region_2 adf.f=Region_2
H 1.302013 -3.011128 -1.757142 region=Region_2 adf.f=Region_2
C 2.56106 0.9154600000000001 -2.46181 region=Region_2 adf.f=Region_2
H 2.796225 1.051306 -3.535155 region=Region_2 adf.f=Region_2
H 2.711606 1.894306 -1.975592 region=Region_2 adf.f=Region_2
H 3.310217 0.215276 -2.055784 region=Region_2 adf.f=Region_2
C -0.064808 2.721842 -2.30241 region=Region_2 adf.f=Region_2
H -0.069919 3.08805 -3.347899 region=Region_2 adf.f=Region_2
```



## Supporting Information

H -0.969300000000001 3.136995 -1.822558 region=Region\_2 adf.f=Region\_2  
H 0.8192 3.171518 -1.816014 region=Region\_2 adf.f=Region\_2  
C 3.41673 -1.079621 0.756225 region=Region\_1 adf.f=Region\_1  
H 3.222435 -2.050901 0.269752 region=Region\_1 adf.f=Region\_1  
H 3.888663 -0.415355 0.013125 region=Region\_1 adf.f=Region\_1  
H 4.168787 -1.2632 1.547787 region=Region\_1 adf.f=Region\_1  
C -1.053206 -0.616762 3.339556 region=Region\_1 adf.f=Region\_1  
H -0.806267 -0.793591 4.404134 region=Region\_1 adf.f=Region\_1  
H -1.802832 0.194081 3.320985 region=Region\_1 adf.f=Region\_1  
H -1.542895 -1.539944 2.977849 region=Region\_1 adf.f=Region\_1  
C 0.03212 2.346987 2.663593 region=Region\_1 adf.f=Region\_1  
H 0.140358 3.131345 1.891307 region=Region\_1 adf.f=Region\_1  
H -1.042116 2.24012 2.895142 region=Region\_1 adf.f=Region\_1  
H 0.514028 2.745659 3.577643 region=Region\_1 adf.f=Region\_1  
C 2.774731 2.063313 1.090185 region=Region\_1 adf.f=Region\_1  
H 3.509378 1.760349 0.326677 region=Region\_1 adf.f=Region\_1  
H 2.198569 2.91711 0.68785 region=Region\_1 adf.f=Region\_1  
H 3.346182 2.452701 1.955172 region=Region\_1 adf.f=Region\_1  
C 1.018577 -2.712386 2.078048 region=Region\_1 adf.f=Region\_1  
H 1.569017 -3.0791 2.9667 region=Region\_1 adf.f=Region\_1  
H -0.021632 -3.068016 2.186928 region=Region\_1 adf.f=Region\_1  
H 1.464688 -3.217611 1.202572 region=Region\_1 adf.f=Region\_1

End

Charge 1.0

BondOrders

2 3 1.5  
2 6 1.5  
2 24 1.0  
3 4 1.5  
3 20 1.0  
4 5 1.5  
4 16 1.0  
5 6 1.5  
5 12 1.0  
6 28 1.0  
7 8 1.5  
7 11 1.5  
7 44 1.0  
8 9 1.5  
8 40 1.0  
9 10 1.5  
9 36 1.0  
10 11 1.5  
10 48 1.0  
11 32 1.0  
12 13 1.0  
12 14 1.0  
12 15 1.0  
16 17 1.0  
16 18 1.0  
16 19 1.0  
20 21 1.0  
20 22 1.0  
20 23 1.0  
24 25 1.0  
24 26 1.0  
24 27 1.0  
28 29 1.0  
28 30 1.0  
28 31 1.0  
32 33 1.0  
32 34 1.0

## Supporting Information

```
32 35 1.0
36 37 1.0
36 38 1.0
36 39 1.0
40 41 1.0
40 42 1.0
40 43 1.0
44 45 1.0
44 46 1.0
44 47 1.0
48 49 1.0
48 50 1.0
48 51 1.0
End
End

Engine ADF
Basis
  Type TZ2P
  Core None
End
SpinPolarization 5.0
Fragments
  Region_1 Region_1.rkf
  Region_2 Region_2.rkf
End

Print ETSLOWDIN-Unrestricted
Print NOCVHIRSHFELD
XC
  Hybrid PBE0
  DISPERSION GRIMME3 BJDAMP
End
Symmetry NOSYM
Unrestricted Yes
BeckeGrid
  Quality Good
End
NumericalQuality Good
SCF
  Iterations 2000
  DIIS
  N 15
  End
  AccelerationMethod MESA
End
UnrestrictedFragments Yes
ETSNOCV
  Enabled Yes
End
EndEngine
eor
```

## CASSCF Input File

```
!DKH2 DKH-def2-svp slowconv tightscf autoaux
!moread
%moinp "/home/mshruti.iith/ibtesham/homoleptic/Dy55/Dy55-n.gbw"

%pal nprocs 12
end
```

## Supporting Information

%Maxcore 6000

%basis newgto Dy

0 6  
1 1205955.486947000027 0.008165729207  
2 535980.216420999961 -0.004019299653  
3 238213.429520000005 0.016042861724  
4 105872.635341999994 0.006534642408  
5 47054.504596999999 0.032501357805  
6 20913.113153999999 0.044343203836  
0 1  
7 9294.716957000001 1.000000000000  
0 1  
8 4130.985314000000 1.000000000000  
0 1  
9 1835.993473000000 1.000000000000  
0 1  
10 815.997099000000 1.000000000000  
0 1  
11 362.665377000000 1.000000000000  
0 1  
12 161.184612000000 1.000000000000  
0 1  
13 71.637605000000 1.000000000000  
0 1  
14 31.838936000000 1.000000000000  
0 1  
15 14.150638000000 1.000000000000  
0 1  
16 6.289172000000 1.000000000000  
0 1  
17 2.795188000000 1.000000000000  
0 1  
18 1.242306000000 1.000000000000  
0 1  
19 0.552136000000 1.000000000000  
0 1  
20 0.245394000000 1.000000000000  
0 1  
21 0.109064000000 1.000000000000  
0 1  
22 0.048473000000 1.000000000000  
0 1  
23 0.021543000000 1.000000000000  
1 5  
1 16500.520027999999 0.004760264705  
2 6600.208011000000 0.005897483480  
3 2640.083204000000 0.029326527847  
4 1056.033282000000 0.089161858001  
5 422.413313000000 0.265122289728  
1 1  
6 168.965325000000 1.000000000000  
1 1  
7 67.586130000000 1.000000000000  
1 1  
8 27.034452000000 1.000000000000  
1 1  
9 10.813781000000 1.000000000000  
1 1  
10 4.325512000000 1.000000000000  
1 1  
11 1.730205000000 1.000000000000

## Supporting Information

```
1 1
12 0.692082000000 1.000000000000
1 1
13 0.276833000000 1.000000000000
1 1
14 0.110733000000 1.000000000000
1 1
15 0.044293000000 1.000000000000
1 1
16 0.017717000000 1.000000000000
2 4
1 1185.048662000000 0.004734300415
2 430.926786000000 0.026490774838
3 156.700650000000 0.145474353692
4 56.982054000000 0.463452784138
2 1
5 20.720747000000 1.000000000000
2 1
6 7.534817000000 1.000000000000
2 1
7 2.739933000000 1.000000000000
2 1
8 0.996339000000 1.000000000000
2 1
9 0.362305000000 1.000000000000
2 1
10 0.131747000000 1.000000000000
2 1
11 0.047908000000 1.000000000000
2 1
12 0.017421000000 1.000000000000
3 4
1 33.836944000000 0.101241740066
2 11.278981000000 0.330021330584
3 3.759660000000 0.494377985697
4 1.253220000000 0.347706969111
3 1
5 0.417740000000 0.145206846483
3 1
6 0.139247000000 1.000000000000
end
end
```

```
%method
SpecialGridAtoms 66
SpecialGridIntAcc 9
end
```

```
%casscf
nel 9
norb 7
mult 6,4,2
nroots 21,224,120
actorbs forbs
nevpt2 true
maxiter 100
ci
nguessmat 8000
maxiter 100
end
```

```
rel
```

## Supporting Information

dosoc true  
gtensor true  
printlevel 3  
NDoubGTensor 8  
domagnetization true  
dosusceptibility true

SUSTempMIN 2.0  
SUSTempMAX 300.0  
SUSNPoints 100

MAGTemperatureMIN 2.0  
MAGTemperatureMAX 5.0  
MAGTemperatureNPoints 4

MAGFieldMIN 0.0  
MAGFieldMAX 70000.0  
MAGNpoints 15

end

ANISO  
doaniso true  
MLTP 2,2,2,2,2,2,2,2  
TINT 0, 300, 100  
HINT 0, 7.0, 10  
TMAG 2.0, 3.0, 5.0  
CRYS\_element "Dy"  
CRYS\_charge 3  
PLOT true  
UBAR true  
end  
end

\*xyz 1 6

|    |                 |                 |                 |
|----|-----------------|-----------------|-----------------|
| Dy | 0.000000000000  | 0.000000000000  | 0.000000000000  |
| C  | 1.157918712184  | 0.404148230124  | -2.293778758050 |
| C  | 0.747884502475  | -0.967427218409 | -2.285178865700 |
| C  | -0.696900842632 | -1.001636036929 | -2.261708727721 |
| C  | -1.176608525320 | 0.346457484487  | -2.260420583506 |
| C  | -0.032293846672 | 1.218457540662  | -2.264045730813 |
| C  | 1.896265882687  | 0.917978302092  | 1.510000355064  |
| C  | 0.662943989271  | 1.043876413575  | 2.252932513009  |
| C  | 0.183297780820  | -0.271222473181 | 2.551572897517  |
| C  | 1.105514012837  | -1.213948170343 | 1.978160146375  |
| C  | 2.172198785582  | -0.476684072208 | 1.344924504544  |
| C  | -2.617102872079 | 0.786715070251  | -2.271301782725 |
| H  | -2.783443023321 | 1.712436405819  | -1.689377024691 |
| H  | -2.955269481754 | 1.004735576285  | -3.302661122935 |
| H  | -3.295834672753 | 0.011070137836  | -1.874794835371 |
| C  | -1.531372699577 | -2.254130280088 | -2.273174943648 |
| H  | -1.081417727741 | -3.068107099222 | -1.674450454046 |
| H  | -2.555805013620 | -2.080543440205 | -1.899741630380 |
| H  | -1.633186375053 | -2.649281432905 | -3.302749691041 |
| C  | 1.643244092855  | -2.170481780600 | -2.389287899682 |
| H  | 1.665689964282  | -2.551155598827 | -3.429030034480 |
| H  | 2.682641049214  | -1.934845684983 | -2.108403672315 |
| H  | 1.302013105727  | -3.011128081554 | -1.757142326961 |
| C  | 2.561059797030  | 0.915460395816  | -2.461810204421 |
| H  | 2.796224768917  | 1.051306422457  | -3.535154978248 |
| H  | 2.711606183204  | 1.894306089143  | -1.975591647029 |
| H  | 3.310216952019  | 0.215276139540  | -2.055783720193 |

## Supporting Information

|   |                 |                 |                 |
|---|-----------------|-----------------|-----------------|
| C | -0.064808108766 | 2.721841806701  | -2.302409749379 |
| H | -0.069918640385 | 3.088049783819  | -3.347899016859 |
| H | -0.969299965123 | 3.136994632776  | -1.822557951200 |
| H | 0.819200232511  | 3.171518137984  | -1.816014247935 |
| C | 3.416729696373  | -1.079620621612 | 0.756224660955  |
| H | 3.222434852091  | -2.050900704856 | 0.269752030260  |
| H | 3.888662502108  | -0.415355075462 | 0.013124767693  |
| H | 4.168786594178  | -1.263200203999 | 1.547787424005  |
| C | -1.053205703625 | -0.616761844125 | 3.339556171619  |
| H | -0.806266546253 | -0.793591094400 | 4.404134480890  |
| H | -1.802832230215 | 0.194081478199  | 3.320984914742  |
| H | -1.542894690355 | -1.539944214904 | 2.977848513048  |
| C | 0.032119949540  | 2.346986650164  | 2.663592507768  |
| H | 0.140358337304  | 3.131345453470  | 1.891307139167  |
| H | -1.042116468064 | 2.240119802668  | 2.895142136441  |
| H | 0.514028002145  | 2.745658820205  | 3.577642525900  |
| C | 2.774731350726  | 2.063313039789  | 1.090184648141  |
| H | 3.509377520640  | 1.760348719377  | 0.326677025841  |
| H | 2.198568995049  | 2.917110156156  | 0.687850414681  |
| H | 3.346181589227  | 2.452700793817  | 1.955171920150  |
| C | 1.018576928426  | -2.712386204176 | 2.078048467505  |
| H | 1.569016618081  | -3.079100126918 | 2.966699600844  |
| H | -0.021632118398 | -3.068015964206 | 2.186927773380  |
| H | 1.464688187219  | -3.217611153764 | 1.202572027910  |

\*

## References

1. J. P. Durrant, B. M. Day, J. Tang, A. Mansikkamaki and R. A. Layfield, *Angew. Chem. Int. Edit.*, 2022, **61**, e202200525.
2. S. Demir, M. D. Boshart, J. F. Corbey, D. H. Woen, M. I. Gonzalez, J. W. Ziller, K. R. Meihaus, J. R. Long and W. J. Evans, *Inorg. Chem.*, 2017, **56**, 15049-15056.
3. H. Braunschweig, N. Buggisch, U. Englert, M. Homberger, T. Kupfer, D. Leusser, M. Lutz and K. Radacki, *J. Am. Chem. Soc.*, 2007, **129**, 4840-4846.
4. T. Arliguie, M. Lance, M. Nierlich, J. Vigner and M. Ephritikhine, *J. Chem. Soc., Chem. Commun.*, 1995, DOI: 10.1039/C39950000183, 183-184.
5. M. Jeletic, P. H. Lin, J. J. Le Roy, I. Korobkov, S. I. Gorelsky and M. Murugesu, *J. Am. Chem. Soc.*, 2011, **133**, 19286-19289.
6. L. Munzfeld, C. Schoo, S. Bestgen, E. Moreno-Pineda, R. Koppe, M. Ruben and P. W. Roesky, *Nat. Commun.*, 2019, **10**, 3135.
7. L. Bondi, A. L. Garden, F. Totti, P. Jerabek and S. Brooker, *Chem. Eur. J.*, 2022, **28**.
8. L. Bondi, A. L. Garden, P. Jerabek, F. Totti and S. Brooker, *Chem. Eur. J.*, 2020, **26**, 13677-13685.
